# Supplementary material for: The Core Human Microbiome: Does It Exist and How Can We Find It? A Critical Review of the Concept
Source: Nutrients. 2022 Jul 13;14(14):2872. doi: 10.3390/nu14142872 (PMC9323970; doi:10.3390/nu14142872)
Supplement: Supplementary file 1 [file nutrients-14-02872-s001.zip › Core-microbiome.Supp_tables.xlsx]

## Sheet: Table S1
Table S1: Summary of information of the data that was used for the community and function analyses. A complete list of the samples used from each project is available at the end of this document.
Dataset name	NCBI project ID	Number of samples	Average number of species/sample detected
HMP 1	PRJNA48479	138	62.3±16.8
HMP 2	PRJNA48479	91	64.1±16.5
HMP 3	PRJNA275349	42	58.0±19.0
MetaHit/Denmark, healthy	PRJEB2054	64	100.1±12.3
MetaHit/Spain, IBD	PRJEB2054	16	92.8±23.4
Central Africa Republic	PRJNA635116	19	97.6±13.7
Gorillas	PRJNA635116	15	14.1±3.8
Mice	PRJEB7759	141	26.6±8.4
Chicken	PRJNA408020	121	64.9±23.7

## Sheet: Table S2
Table S2: Statistics of samples related to the human microbiome. number of samples, number of samples <200Mbp (likely 16S) and the rest (likely metagenomics) samples identified in the European Nucleotide Archive for different taxonomic terms associated with the human microbiome
Term	Number of samples	<200Mbp	Rest
human bile metagenome	222	203	19
human blood metagenome	2621	2288	333
human brain metagenome	91	91	0
human eye metagenome	665	638	27
human feces metagenome	420	398	22
human gut metagenome	320638	264373	56265
human hair metagenome	0	0	0
human lung metagenome	22638	21526	1112
human metagenomes	0	0	0
human metagenome	115956	104205	11751
human milk metagenome	4658	4498	160
human nasopharyngeal metagenome	19094	18195	899
human oral metagenome	58878	56296	2582
human reproductive system metagenome	3308	3207	101
human saliva metagenome	3556	3444	112
human semen metagenome	203	89	114
human skeleton metagenome	1	1	0
human skin metagenome	38766	35945	2821
human sputum metagenome	1246	1156	90
human tracheal metagenome	411	405	6
human urinary tract metagenome	2472	2459	13
human vaginal metagenome	17617	17193	424
human viral metagenome	199	27	172
Total	613660	536637	77023

## Sheet: Table S3
Table S3: fraction of samples in each cohort in which the species was identified. Avg. abundance - average relative abundance across samples in which the species was found
Species	HMP.phase1		HMP.phase2		HMP.phase3		MetaHit.Healthy		MetaHit.IBD		Traditional		Gorillas		Mice		Chicken
	Fraction of samples	Avg. Abundance	Fraction of samples	Avg. Abundance	Fraction of samples	Avg. Abundance	Fraction of samples	Avg. Abundance	Fraction of samples	Avg. Abundance	Fraction of samples	Avg. Abundance	Fraction of samples	Avg. Abundance	Fraction of samples	Avg. Abundance	Fraction of samples	Avg. Abundance
k__Bacteria|p__Firmicutes|c__Clostridia|o__Clostridiales|f__Lachnospiraceae|g__Butyrivibrio|s__Butyrivibrio_crossotus	0.072	13.591	0.055	4.283	0.024	0.494	0.391	10.524	0.062	0.004	0.579	2.119	0	0	0	0	0	0
k__Bacteria|p__Bacteroidetes|c__Bacteroidia|o__Bacteroidales|f__Bacteroidaceae|g__Bacteroides|s__Bacteroides_vulgatus	0.848	19.002	0.912	19.956	1	24.207	0.891	7.1	0.812	7.168	0.263	1.393	0.067	1.196	0.433	8.001	0.008	0.006
k__Bacteria|p__Firmicutes|c__Clostridia|o__Clostridiales|f__Ruminococcaceae|g__Ruminococcaceae_unclassified|s__Eubacterium_siraeum	0.42	1.409	0.527	1.477	0.405	0.681	0.75	2.527	0.625	1.958	0.737	0.7	0	0	0	0	0	0
k__Bacteria|p__Firmicutes|c__Clostridia|o__Clostridiales|f__Clostridiaceae|g__Clostridium|s__Clostridium_sp_CAG_510	0	0	0	0	0.024	0.048	0.094	4.315	0.062	4.23	0.474	1.348	0.467	29.21	0	0	0	0
k__Bacteria|p__Firmicutes|c__Clostridia|o__Clostridiales|f__Lachnospiraceae|g__Roseburia|s__Roseburia_faecis	0.659	0.99	0.648	0.725	0.548	1.068	0.875	2.895	0.75	4.216	0.737	0.276	0	0	0	0	0	0
k__Bacteria|p__Firmicutes|c__Clostridia|o__Clostridiales|f__Lachnospiraceae|g__Lachnospiraceae_unclassified|s__Eubacterium_rectale	0.877	1.787	0.846	1.447	0.81	1.876	0.906	2.888	0.812	2.296	0.947	2.115	0	0	0	0	0	0
k__Bacteria|p__Bacteroidetes|c__Bacteroidia|o__Bacteroidales|f__Rikenellaceae|g__Alistipes|s__Alistipes_putredinis	0.754	8.037	0.714	9.587	0.714	10.66	0.828	4.291	0.875	2.676	0.105	0.156	0	0	0	0	0.008	0.151
k__Bacteria|p__Firmicutes|c__Clostridia|o__Clostridiales|f__Ruminococcaceae|g__Faecalibacterium|s__Faecalibacterium_prausnitzii	0.964	3.462	0.978	3.327	0.905	2.166	1	5.756	0.938	8.863	1	7.573	0.067	1.156	0	0	0.025	0.035
k__Bacteria|p__Firmicutes|c__Clostridia|o__Clostridiales|f__Lachnospiraceae|g__Lachnospira|s__Lachnospira_pectinoschiza	0.551	0.617	0.516	0.475	0.452	0.235	0.734	1.546	0.375	0.535	0.526	0.106	0.333	5.722	0	0	0	0
k__Bacteria|p__Firmicutes|c__Clostridia|o__Clostridiales|f__Eubacteriaceae|g__Eubacterium|s__Eubacterium_eligens	0.768	0.732	0.703	0.676	0.667	0.733	0.828	2.382	0.75	4.391	1	1.672	0	0	0	0	0	0
k__Bacteria|p__Firmicutes|c__Clostridia|o__Clostridiales|f__Ruminococcaceae|g__Ruminococcus|s__Ruminococcus_bicirculans	0.696	3.854	0.615	2.002	0.714	3.505	0.781	1.005	0.5	0.76	0.684	0.244	0	0	0	0	0	0
k__Bacteria|p__Firmicutes|c__Clostridia|o__Clostridiales|f__Ruminococcaceae|g__Ruminococcus|s__Ruminococcus_bromii	0.551	2.437	0.462	2.401	0.5	1.228	0.578	2.595	0.562	2.299	0.842	3.125	0.067	0.188	0	0	0	0
k__Bacteria|p__Bacteroidetes|c__Bacteroidia|o__Bacteroidales|f__Bacteroidaceae|g__Bacteroides|s__Bacteroides_uniformis	0.891	9.804	0.934	10.395	0.857	14.719	0.953	6.576	0.812	5.552	0.368	0.503	0	0	0.525	2.466	0.124	1.118
k__Bacteria|p__Firmicutes|c__Erysipelotrichia|o__Erysipelotrichales|f__Erysipelotrichaceae|g__Catenibacterium|s__Catenibacterium_mitsuokai	0.072	0.287	0.066	0.025	0	0	0.156	0.513	0.375	0.511	0.895	0.829	0	0	0	0	0	0
k__Bacteria|p__Firmicutes|c__Clostridia|o__Clostridiales|f__Lachnospiraceae|g__Fusicatenibacter|s__Fusicatenibacter_saccharivorans	0.826	0.256	0.912	0.28	0.786	0.331	1	1.258	0.75	1.101	0.947	0.336	0	0	0	0	0	0
k__Bacteria|p__Firmicutes|c__Negativicutes|o__Acidaminococcales|f__Acidaminococcaceae|g__Phascolarctobacterium|s__Phascolarctobacterium_succinatutens	0.08	1.125	0.077	3.137	0.095	0.286	0.234	2.471	0.25	2.177	0.947	5.973	0	0	0	0	0	0
k__Bacteria|p__Bacteroidetes|c__Bacteroidia|o__Bacteroidales|f__Tannerellaceae|g__Parabacteroides|s__Parabacteroides_distasonis	0.797	3.48	0.703	2.573	0.81	2.643	0.906	2.007	0.938	1.622	0.421	0.787	0.067	0.554	0.199	2.332	0.025	3.6
k__Bacteria|p__Bacteroidetes|c__Bacteroidia|o__Bacteroidales|f__Bacteroidaceae|g__Bacteroides|s__Bacteroides_cellulosilyticus	0.507	2.694	0.407	2.966	0.429	1.332	0.516	1.445	0.25	1.997	0.105	0.069	0	0	0	0	0	0
k__Bacteria|p__Bacteroidetes|c__Bacteroidia|o__Bacteroidales|f__Tannerellaceae|g__Parabacteroides|s__Parabacteroides_merdae	0.609	4.639	0.648	4.704	0.452	6.228	0.734	1.502	0.625	1.005	0.211	1.348	0	0	0	0	0.025	1.402
k__Bacteria|p__Bacteroidetes|c__Bacteroidia|o__Bacteroidales|f__Prevotellaceae|g__Paraprevotella|s__Paraprevotella_xylaniphila	0.138	1.436	0.165	1.79	0.143	2.105	0.422	1.367	0.438	0.428	0.053	0.006	0	0	0	0	0	0
k__Bacteria|p__Firmicutes|c__Clostridia|o__Clostridiales|f__Clostridiales_unclassified|g__Clostridiales_unclassified|s__Bacteroides_pectinophilus	0.014	0.481	0.033	0.305	0	0	0.109	0.598	0.125	2.418	0.316	0.55	0	0	0	0	0	0
k__Bacteria|p__Bacteroidetes|c__Bacteroidia|o__Bacteroidales|f__Bacteroidaceae|g__Bacteroides|s__Bacteroides_plebeius	0.087	10.458	0.198	9.158	0	0	0.219	5.909	0.375	5.751	0.053	0.024	0	0	0	0	0.793	5.524
k__Bacteria|p__Bacteroidetes|c__Bacteroidia|o__Bacteroidales|f__Bacteroidaceae|g__Bacteroides|s__Bacteroides_salyersiae	0.145	1.416	0.143	1.043	0.095	1.557	0.188	1.377	0.125	0.889	0	0	0	0	0	0	0.008	0.059
k__Bacteria|p__Firmicutes|c__Clostridia|o__Clostridiales|f__Lachnospiraceae|g__Roseburia|s__Roseburia_inulinivorans	0.819	0.58	0.802	0.39	0.738	0.438	1	0.986	0.625	0.694	1	1.342	0	0	0	0	0	0
k__Bacteria|p__Firmicutes|c__Clostridia|o__Clostridiales|f__Lachnospiraceae|g__Anaerostipes|s__Anaerostipes_hadrus	0.775	0.112	0.714	0.132	0.714	0.137	1	0.814	0.812	1.175	0.842	0.342	0.267	5.873	0	0	0	0
k__Bacteria|p__Firmicutes|c__Clostridia|o__Clostridiales|f__Lachnospiraceae|g__Coprococcus|s__Coprococcus_comes	0.775	0.18	0.659	0.206	0.714	0.121	0.969	0.552	0.812	0.961	1	0.189	0	0	0	0	0	0
k__Bacteria|p__Bacteroidetes|c__Bacteroidia|o__Bacteroidales|f__Bacteroidaceae|g__Bacteroides|s__Bacteroides_caccae	0.638	4.568	0.56	4.872	0.476	4.138	0.672	1.338	0.625	0.514	0.158	0.698	0	0	0.206	0.549	0	0
k__Bacteria|p__Firmicutes|c__Clostridia|o__Clostridiales|f__Clostridiaceae|g__Clostridium|s__Clostridium_sp_CAG_413	0.007	0.014	0	0	0	0	0.094	2.276	0.062	2.37	0.421	0.827	0	0	0	0	0	0
k__Bacteria|p__Bacteroidetes|c__Bacteroidia|o__Bacteroidales|f__Bacteroidaceae|g__Bacteroides|s__Bacteroides_dorei	0.464	9.423	0.396	6.976	0.357	8.997	0.734	5.048	0.875	7.853	0.263	1.094	0	0	0.121	30.479	0.074	0.703
k__Bacteria|p__Firmicutes|c__Clostridia|o__Clostridiales|f__Oscillospiraceae|g__Oscillibacter|s__Oscillibacter_sp_57_20	0.696	0.631	0.659	1.179	0.738	0.817	0.844	0.679	0.5	0.454	0.947	0.953	0	0	0	0	0	0
k__Bacteria|p__Firmicutes|c__Clostridia|o__Clostridiales|f__Lachnospiraceae|g__Dorea|s__Dorea_longicatena	0.826	0.138	0.846	0.143	0.762	0.112	0.938	0.661	0.875	0.553	0.947	0.566	0.533	19.127	0	0	0	0
k__Bacteria|p__Actinobacteria|c__Actinobacteria|o__Bifidobacteriales|f__Bifidobacteriaceae|g__Bifidobacterium|s__Bifidobacterium_adolescentis	0.478	0.257	0.495	0.519	0.524	0.209	0.75	0.909	0.812	2.518	0.263	0.199	0	0	0	0	0	0
k__Bacteria|p__Firmicutes|c__Clostridia|o__Clostridiales|f__Lachnospiraceae|g__Roseburia|s__Roseburia_intestinalis	0.783	0.627	0.725	0.526	0.69	0.361	0.875	1.564	0.875	0.696	0.632	0.075	0	0	0	0	0	0
k__Bacteria|p__Actinobacteria|c__Coriobacteriia|o__Coriobacteriales|f__Coriobacteriaceae|g__Collinsella|s__Collinsella_aerofaciens	0.732	0.312	0.703	0.414	0.69	0.28	1	0.46	0.875	0.662	1	3.961	0.933	6.905	0.05	0.009	0.388	0.127
k__Bacteria|p__Bacteroidetes|c__Bacteroidia|o__Bacteroidales|f__Odoribacteraceae|g__Odoribacter|s__Odoribacter_splanchnicus	0.746	1.263	0.703	1.286	0.667	0.938	0.984	0.918	0.812	0.477	0.211	0.157	0	0	0	0	0.066	0.302
k__Bacteria|p__Firmicutes|c__Bacilli|o__Lactobacillales|f__Lactobacillaceae|g__Lactobacillus|s__Lactobacillus_rogosae	0.217	0.055	0.176	0.031	0.071	0.017	0.625	0.17	0.25	0.021	0.316	0.037	0	0	0	0	0	0
k__Bacteria|p__Synergistetes|c__Synergistia|o__Synergistales|f__Synergistaceae|g__Cloacibacillus|s__Cloacibacillus_porcorum	0.007	0.003	0.011	0.017	0.024	0.003	0.047	0.309	0.062	0.002	0	0	0	0	0	0	0	0
k__Bacteria|p__Firmicutes|c__Clostridia|o__Clostridiales|f__Ruminococcaceae|g__Gemmiger|s__Gemmiger_formicilis	0.746	0.102	0.747	0.146	0.643	0.111	0.953	0.287	0.625	0.458	1	0.193	0	0	0	0	0	0
k__Bacteria|p__Firmicutes|c__Firmicutes_unclassified|o__Firmicutes_unclassified|f__Firmicutes_unclassified|g__Firmicutes_unclassified|s__Firmicutes_bacterium_CAG_83	0.638	0.258	0.659	0.759	0.571	0.532	0.797	0.29	0.812	0.678	0.842	1.41	0	0	0	0	0	0
k__Bacteria|p__Firmicutes|c__Clostridia|o__Clostridiales|f__Ruminococcaceae|g__Ruminococcus|s__Ruminococcus_lactaris	0.391	0.297	0.374	0.333	0.429	0.147	0.734	0.548	0.25	0.778	0.421	1.602	0	0	0	0	0	0
k__Bacteria|p__Bacteroidetes|c__Bacteroidia|o__Bacteroidales|f__Bacteroidaceae|g__Bacteroides|s__Bacteroides_fragilis	0.522	2.468	0.505	2.655	0.595	1.921	0.516	0.857	0.375	2.738	0.158	5.008	0	0	0	0	0.083	0.926
k__Bacteria|p__Bacteroidetes|c__Bacteroidia|o__Bacteroidales|f__Bacteroidaceae|g__Bacteroides|s__Bacteroides_thetaiotaomicron	0.804	3.446	0.736	3.15	0.714	3.877	0.812	0.989	0.812	1.513	0.158	0.824	0	0	0.206	5.486	0.025	0.306
k__Bacteria|p__Bacteroidetes|c__Bacteroidia|o__Bacteroidales|f__Bacteroidaceae|g__Bacteroides|s__Bacteroides_ovatus	0.841	7.022	0.835	6.459	0.881	6.511	0.781	0.682	0.75	2.002	0.211	0.144	0	0	0.057	4.778	0.008	0.024
k__Bacteria|p__Firmicutes|c__Clostridia|o__Clostridiales|f__Lachnospiraceae|g__Blautia|s__Blautia_obeum	0.696	0.1	0.571	0.072	0.595	0.085	0.969	0.224	0.812	0.147	0.895	0.235	0	0	0	0	0	0
k__Bacteria|p__Firmicutes|c__Firmicutes_unclassified|o__Firmicutes_unclassified|f__Firmicutes_unclassified|g__Firmicutes_unclassified|s__Firmicutes_bacterium_CAG_110	0.355	0.45	0.308	0.375	0.19	0.578	0.781	0.601	0.438	0.74	0.789	0.414	0	0	0	0	0	0
k__Bacteria|p__Bacteroidetes|c__Bacteroidia|o__Bacteroidales|f__Prevotellaceae|g__Paraprevotella|s__Paraprevotella_clara	0.109	0.14	0.088	0.149	0.071	0.251	0.141	0.12	0.312	0.038	0	0	0	0	0	0	0	0
k__Bacteria|p__Firmicutes|c__Clostridia|o__Clostridiales|f__Lachnospiraceae|g__Roseburia|s__Roseburia_sp_CAG_182	0.138	0.12	0.099	0.149	0.095	0.045	0.422	0.204	0.125	0.018	0.105	1.044	0.467	14.722	0	0	0	0
k__Bacteria|p__Bacteroidetes|c__Bacteroidia|o__Bacteroidales|f__Barnesiellaceae|g__Barnesiella|s__Barnesiella_intestinihominis	0.384	3.555	0.352	3.396	0.357	2.319	0.859	1.972	0.75	1.405	0.053	0.034	0	0	0	0	0.008	0.078
k__Bacteria|p__Firmicutes|c__Clostridia|o__Clostridiales|f__Lachnospiraceae|g__Roseburia|s__Roseburia_hominis	0.754	0.161	0.736	0.243	0.548	0.127	0.953	0.395	0.688	0.23	0.526	0.051	0.4	11.737	0	0	0	0
k__Bacteria|p__Firmicutes|c__Bacilli|o__Lactobacillales|f__Lactobacillaceae|g__Lactobacillus|s__Lactobacillus_ruminis	0.022	0.231	0.044	0.189	0	0	0.156	0.248	0.125	0.482	0.158	0.423	0.067	0.705	0	0	0	0
k__Bacteria|p__Firmicutes|c__Clostridia|o__Clostridiales|f__Eubacteriaceae|g__Eubacterium|s__Eubacterium_sp_CAG_38	0.471	0.237	0.418	0.27	0.452	0.211	0.844	0.459	0.438	0.643	0.474	0.125	0.067	0.312	0	0	0	0
k__Bacteria|p__Firmicutes|c__Clostridia|o__Clostridiales|f__Lachnospiraceae|g__Coprococcus|s__Coprococcus_catus	0.464	0.04	0.374	0.032	0.476	0.059	0.922	0.156	0.688	0.1	0.895	0.095	0	0	0	0	0	0
k__Bacteria|p__Firmicutes|c__Clostridia|o__Clostridiales|f__Lachnospiraceae|g__Roseburia|s__Roseburia_sp_CAG_309	0.145	0.021	0.154	0.03	0.071	0.069	0.578	0.177	0.125	0.042	0.053	1.125	0	0	0	0	0	0
k__Bacteria|p__Firmicutes|c__Clostridia|o__Clostridiales|f__Oscillospiraceae|g__Oscillibacter|s__Oscillibacter_sp_CAG_241	0.399	0.082	0.484	0.376	0.381	0.134	0.906	0.379	0.625	0.045	0.842	0.322	0	0	0	0	0	0
k__Bacteria|p__Firmicutes|c__Clostridia|o__Clostridiales|f__Eubacteriaceae|g__Eubacterium|s__Eubacterium_hallii	0.63	0.079	0.637	0.064	0.5	0.081	1	0.465	0.812	0.353	0.947	0.326	0.4	1.722	0	0	0	0
k__Bacteria|p__Bacteroidetes|c__Bacteroidia|o__Bacteroidales|f__Rikenellaceae|g__Alistipes|s__Alistipes_shahii	0.717	0.497	0.637	1.311	0.738	0.779	0.875	0.279	0.688	0.188	0.263	0.054	0	0	0.05	0.063	0	0
k__Bacteria|p__Firmicutes|c__Clostridia|o__Clostridiales|f__Clostridiaceae|g__Clostridium|s__Clostridium_sp_CAG_58	0.464	0.08	0.505	0.107	0.524	0.133	0.422	0.214	0.625	0.212	0	0	0	0	0	0	0	0
k__Bacteria|p__Candidatus_Melainabacteria|c__Candidatus_Melainabacteria_unclassified|o__Candidatus_Gastranaerophilales|f__Candidatus_Gastranaerophilales_unclassified|g__Candidatus_Gastranaerophilales_unclassified|s__Candidatus_Gastranaerophilales_bacterium	0.007	0.018	0.011	0.429	0	0	0.141	0.096	0.062	0.158	0.053	0.125	0	0	0	0	0.008	0.002
k__Bacteria|p__Bacteroidetes|c__Bacteroidia|o__Bacteroidales|f__Rikenellaceae|g__Alistipes|s__Alistipes_inops	0.087	0.843	0.154	5.958	0.095	0.443	0.453	1.323	0.312	1.877	0	0	0	0	0.064	0.343	0.066	1.213
k__Bacteria|p__Firmicutes|c__Clostridia|o__Clostridiales|f__Lachnospiraceae|g__Dorea|s__Dorea_formicigenerans	0.848	0.141	0.857	0.094	0.786	0.09	1	0.189	0.875	0.174	0.947	0.296	0	0	0	0	0	0
k__Bacteria|p__Firmicutes|c__Firmicutes_unclassified|o__Firmicutes_unclassified|f__Firmicutes_unclassified|g__Firmicutes_unclassified|s__Firmicutes_bacterium_CAG_95	0.261	0.182	0.121	0.337	0.143	0.158	0.484	0.39	0.312	0.101	0.474	0.127	0	0	0	0	0	0
k__Bacteria|p__Proteobacteria|c__Gammaproteobacteria|o__Enterobacterales|f__Enterobacteriaceae|g__Escherichia|s__Escherichia_coli	0.391	1.956	0.418	0.208	0.452	0.098	0.469	1.342	0.5	0.494	0.842	3.688	0.333	5.069	0.163	0.614	0.826	6.985
k__Bacteria|p__Actinobacteria|c__Actinobacteria|o__Bifidobacteriales|f__Bifidobacteriaceae|g__Bifidobacterium|s__Bifidobacterium_longum	0.529	0.195	0.495	0.116	0.619	0.143	0.828	0.421	0.875	0.7	0	0	0	0	0	0	0.008	4.229
k__Archaea|p__Euryarchaeota|c__Methanobacteria|o__Methanobacteriales|f__Methanobacteriaceae|g__Methanobrevibacter|s__Methanobrevibacter_smithii	0.181	0.109	0.154	0.079	0.167	0.046	0.469	0.674	0.375	0.397	0.684	1.546	0.067	0.044	0	0	0	0
k__Bacteria|p__Bacteroidetes|c__Bacteroidia|o__Bacteroidales|f__Rikenellaceae|g__Alistipes|s__Alistipes_finegoldii	0.804	1.781	0.736	1.754	0.667	0.988	0.984	1.584	0.875	0.53	0.053	0.001	0	0	0	0	0	0
k__Bacteria|p__Verrucomicrobia|c__Verrucomicrobiae|o__Verrucomicrobiales|f__Akkermansiaceae|g__Akkermansia|s__Akkermansia_muciniphila	0.514	1.132	0.56	3.524	0.571	1.505	0.766	1.575	0.312	0.392	0.105	0.937	0	0	0.362	23.106	0.017	0.392
k__Bacteria|p__Proteobacteria|c__Betaproteobacteria|o__Burkholderiales|f__Sutterellaceae|g__Parasutterella|s__Parasutterella_excrementihominis	0.696	0.47	0.637	0.537	0.762	0.625	0.812	0.429	0.438	0.362	0.105	0.016	0	0	0.362	1.892	0.017	0.096
k__Bacteria|p__Firmicutes|c__Clostridia|o__Clostridiales|f__Lachnospiraceae|g__Blautia|s__Blautia_wexlerae	0.884	0.081	0.89	0.277	0.81	0.041	0.922	0.238	0.75	0.23	0.895	0.217	0	0	0	0	0	0
k__Bacteria|p__Bacteroidetes|c__Bacteroidia|o__Bacteroidales|f__Odoribacteraceae|g__Butyricimonas|s__Butyricimonas_synergistica	0.348	0.192	0.352	0.223	0.381	0.133	0.469	0.069	0.562	0.075	0	0	0	0	0	0	0.008	0.007
k__Bacteria|p__Firmicutes|c__Clostridia|o__Clostridiales|f__Eubacteriaceae|g__Eubacterium|s__Eubacterium_ventriosum	0.58	0.17	0.418	0.15	0.452	0.067	0.781	0.144	0.375	0.102	0.737	0.103	0	0	0	0	0	0
k__Bacteria|p__Firmicutes|c__Erysipelotrichia|o__Erysipelotrichales|f__Erysipelotrichaceae|g__Holdemanella|s__Holdemanella_biformis	0.087	0.148	0.132	0.122	0.095	0.144	0.359	0.333	0.312	0.411	0.947	1.678	0	0	0	0	0	0
k__Bacteria|p__Bacteroidetes|c__Bacteroidia|o__Bacteroidales|f__Bacteroidaceae|g__Bacteroides|s__Bacteroides_xylanisolvens	0.645	3.2	0.78	2.028	0.738	3.387	0.766	0.541	0.5	0.199	0.263	1.027	0	0	0	0	0.025	0.105
k__Bacteria|p__Firmicutes|c__Firmicutes_unclassified|o__Firmicutes_unclassified|f__Firmicutes_unclassified|g__Firmicutes_unclassified|s__Firmicutes_bacterium_CAG_94	0.116	0.035	0.187	0.059	0.048	0.012	0.406	0.11	0.438	0.138	0	0	0	0	0	0	0.711	1.67
k__Bacteria|p__Firmicutes|c__Clostridia|o__Clostridiales|f__Eubacteriaceae|g__Eubacterium|s__Eubacterium_ramulus	0.471	0.066	0.473	0.035	0.429	0.022	0.859	0.09	0.812	0.133	0.737	0.118	0.2	0.852	0	0	0	0
k__Bacteria|p__Firmicutes|c__Clostridia|o__Clostridiales|f__Clostridiales_unclassified|g__Lawsonibacter|s__Lawsonibacter_asaccharolyticus	0.5	0.052	0.648	0.098	0.667	0.08	0.953	0.091	0.812	0.086	0	0	0	0	0	0	0.017	0.016
k__Bacteria|p__Proteobacteria|c__Betaproteobacteria|o__Burkholderiales|f__Sutterellaceae|g__Sutterella|s__Sutterella_parvirubra	0.275	0.042	0.22	0.068	0.167	0.019	0.578	0.06	0.688	0.034	0.263	0.046	0	0	0	0	0.537	0.205
k__Bacteria|p__Firmicutes|c__Clostridia|o__Clostridiales|f__Ruminococcaceae|g__Agathobaculum|s__Agathobaculum_butyriciproducens	0.587	0.054	0.769	0.049	0.619	0.055	0.953	0.165	0.812	0.213	0.947	0.243	0	0	0	0	0	0
k__Bacteria|p__Actinobacteria|c__Coriobacteriia|o__Eggerthellales|f__Eggerthellaceae|g__Asaccharobacter|s__Asaccharobacter_celatus	0.261	0.013	0.44	0.018	0.357	0.033	0.672	0.092	0.562	0.083	0	0	0	0	0.816	0.145	0	0
k__Bacteria|p__Actinobacteria|c__Coriobacteriia|o__Coriobacteriales|f__Coriobacteriaceae|g__Collinsella|s__Collinsella_stercoris	0.268	0.05	0.341	0.022	0.286	0.009	1	0.027	0.875	0.042	0.947	0.057	0.733	1.869	0.113	0.011	0.545	0.123
k__Bacteria|p__Firmicutes|c__Clostridia|o__Clostridiales|f__Lachnospiraceae|g__Blautia|s__Ruminococcus_torques	0.797	0.285	0.725	0.206	0.762	0.183	0.922	0.403	0.688	0.197	0.947	2.496	0	0	0	0	0	0
k__Bacteria|p__Bacteroidetes|c__Bacteroidia|o__Bacteroidales|f__Rikenellaceae|g__Alistipes|s__Alistipes_indistinctus	0.514	0.194	0.451	0.578	0.452	0.225	0.734	0.102	0.375	0.061	0	0	0	0	0.057	0.571	0.017	0.047
k__Bacteria|p__Firmicutes|c__Clostridia|o__Clostridiales|f__Ruminococcaceae|g__Ruthenibacterium|s__Ruthenibacterium_lactatiformans	0.899	0.263	0.934	0.5	0.81	0.251	1	0.156	0.938	0.826	0.053	0.057	0.2	4.153	0.007	0.495	0	0
k__Bacteria|p__Firmicutes|c__Bacilli|o__Lactobacillales|f__Lactobacillaceae|g__Sharpea|s__Sharpea_azabuensis	0.007	0.003	0	0	0	0	0.344	0.011	0.312	0.019	0.053	0.027	0	0	0	0	0	0
k__Bacteria|p__Firmicutes|c__Erysipelotrichia|o__Erysipelotrichales|f__Erysipelotrichaceae|g__Holdemania|s__Holdemania_filiformis	0.297	0.017	0.374	0.028	0.286	0.017	0.578	0.029	0.375	0.019	0	0	0	0	0	0	0	0
k__Bacteria|p__Bacteroidetes|c__Bacteroidia|o__Bacteroidales|f__Bacteroidaceae|g__Bacteroides|s__Bacteroides_galacturonicus	0.217	0.028	0.11	0.058	0.095	0.009	0.422	0.123	0.25	0.028	0.053	0.017	0	0	0	0	0	0
k__Bacteria|p__Proteobacteria|c__Deltaproteobacteria|o__Desulfovibrionales|f__Desulfovibrionaceae|g__Bilophila|s__Bilophila_wadsworthia	0.377	0.022	0.374	0.063	0.333	0.104	0.75	0.074	0.688	0.079	0.053	0.003	0	0	0	0	0.041	0.132
k__Bacteria|p__Firmicutes|c__Bacilli|o__Lactobacillales|f__Streptococcaceae|g__Streptococcus|s__Streptococcus_salivarius	0.217	0.033	0.286	0.02	0.19	0.019	0.719	0.161	0.688	0.437	0.421	0.306	0	0	0	0	0.008	0.045
k__Bacteria|p__Firmicutes|c__Clostridia|o__Clostridiales|f__Ruminococcaceae|g__Flavonifractor|s__Flavonifractor_plautii	0.703	0.183	0.868	0.243	0.929	0.353	0.734	0.159	0.875	0.519	0.158	0.186	0	0	0	0	0.025	0.73
k__Bacteria|p__Actinobacteria|c__Coriobacteriia|o__Coriobacteriales|f__Coriobacteriaceae|g__Collinsella|s__Collinsella_intestinalis	0.188	0.051	0.22	0.091	0.214	0.041	0.969	0.015	0.875	0.022	0.684	0.017	0.467	0.779	0.028	0.014	0.364	0.052
k__Bacteria|p__Bacteroidetes|c__Bacteroidia|o__Bacteroidales|f__Barnesiellaceae|g__Coprobacter|s__Coprobacter_fastidiosus	0.21	0.652	0.165	0.488	0.238	0.652	0.594	0.202	0.312	0.184	0	0	0	0	0	0	0.025	0.034
k__Bacteria|p__Bacteroidetes|c__Bacteroidia|o__Bacteroidales|f__Odoribacteraceae|g__Butyricimonas|s__Butyricimonas_virosa	0.449	0.212	0.429	0.273	0.452	0.26	0.703	0.148	0.625	0.191	0.105	0.077	0	0	0.014	0.705	0.008	0.023
k__Bacteria|p__Actinobacteria|c__Coriobacteriia|o__Coriobacteriales|f__Coriobacteriaceae|g__Enorma|s__[Collinsella]_massiliensis	0.196	0.004	0.143	0.004	0.071	0.004	0.984	0.022	0.875	0.031	0.789	0.018	0.8	4.412	0.177	0.024	0.719	0.284
k__Bacteria|p__Firmicutes|c__Firmicutes_unclassified|o__Firmicutes_unclassified|f__Firmicutes_unclassified|g__Firmicutes_unclassified|s__Firmicutes_bacterium_CAG_238	0.029	1.395	0.022	0.007	0.024	0.018	0.406	0.502	0.375	0.09	0.579	0.1	0	0	0	0	0	0
k__Bacteria|p__Synergistetes|c__Synergistia|o__Synergistales|f__Synergistaceae|g__Cloacibacillus|s__Cloacibacillus_evryensis	0.022	0.045	0.033	0.078	0.024	0.022	0.047	1.204	0	0	0	0	0	0	0	0	0	0
k__Archaea|p__Euryarchaeota|c__Methanobacteria|o__Methanobacteriales|f__Methanobacteriaceae|g__Methanosphaera|s__Methanosphaera_stadtmanae	0.007	0.199	0.022	0.003	0	0	0.062	0.008	0	0	0.211	0.032	0	0	0	0	0	0
k__Bacteria|p__Proteobacteria|c__Betaproteobacteria|o__Burkholderiales|f__Sutterellaceae|g__Turicimonas|s__Turicimonas_muris	0.536	0.092	0.418	0.087	0.571	0.115	0.641	0.108	0.562	0.137	0.053	0.004	0	0	0.277	0.136	0.025	0.047
k__Bacteria|p__Bacteroidetes|c__Bacteroidia|o__Bacteroidales|f__Prevotellaceae|g__Prevotella|s__Prevotella_disiens	0.036	0.131	0.033	0.01	0.071	0.023	0.094	0.011	0.062	0.001	0.053	0.168	0	0	0	0	0	0
k__Bacteria|p__Firmicutes|c__Clostridia|o__Clostridiales|f__Ruminococcaceae|g__Ruminococcaceae_unclassified|s__Clostridium_leptum	0.565	0.073	0.648	0.078	0.571	0.071	0.688	0.053	0.312	0.202	0	0	0	0	0	0	0	0
k__Bacteria|p__Actinobacteria|c__Coriobacteriia|o__Eggerthellales|f__Eggerthellaceae|g__Adlercreutzia|s__Adlercreutzia_equolifaciens	0.232	0.012	0.363	0.013	0.381	0.03	0.594	0.081	0.5	0.043	0	0	0	0	0.823	0.112	0	0
k__Bacteria|p__Firmicutes|c__Clostridia|o__Clostridiales|f__Lachnospiraceae|g__Roseburia|s__Roseburia_sp_CAG_471	0.13	0.03	0.055	0.043	0.095	0.009	0.578	0.027	0.438	0.006	1	0.171	0	0	0	0	0	0
k__Bacteria|p__Firmicutes|c__Clostridia|o__Clostridiales|f__Catabacteriaceae|g__Catabacter|s__Catabacter_hongkongensis	0.043	0.027	0.022	0.018	0	0	0.016	0.001	0.062	0.003	0	0	0	0	0	0	0	0
k__Bacteria|p__Actinobacteria|c__Coriobacteriia|o__Eggerthellales|f__Eggerthellaceae|g__Slackia|s__Slackia_isoflavoniconvertens	0.101	0.084	0.099	0.144	0.167	0.052	0.703	0.085	0.688	0.171	0.895	0.23	0.933	2.216	0	0	0	0
k__Bacteria|p__Actinobacteria|c__Coriobacteriia|o__Coriobacteriales|f__Coriobacteriaceae|g__Enorma|s__Enorma_massiliensis	0.072	0.003	0.033	0.016	0	0	0.859	0.026	0.875	0.021	0.368	0.009	0.267	0.645	0.014	0.006	0.777	0.553
k__Bacteria|p__Firmicutes|c__Clostridia|o__Clostridiales|f__Lachnospiraceae|g__Lachnoclostridium|s__Clostridium_citroniae	0.087	0.024	0.088	0.01	0.095	0.015	0.406	0.027	0.562	0.161	0.053	0.505	0	0	0	0	0	0
k__Bacteria|p__Firmicutes|c__Clostridia|o__Clostridiales|f__Ruminococcaceae|g__Ruminococcaceae_unclassified|s__Ruminococcaceae_bacterium_D16	0.094	0.025	0.088	0.035	0.143	0.036	0.188	0.009	0.312	0.048	0	0	0	0	0	0	0.322	0.478
k__Bacteria|p__Bacteroidetes|c__Bacteroidia|o__Bacteroidales|f__Bacteroidaceae|g__Bacteroides|s__Bacteroides_massiliensis	0.326	2.83	0.231	1.246	0.405	3.356	0.375	1.351	0.375	0.577	0.053	0.728	0	0	0.191	4.974	0	0
k__Bacteria|p__Proteobacteria|c__Gammaproteobacteria|o__Pasteurellales|f__Pasteurellaceae|g__Haemophilus|s__Haemophilus_parainfluenzae	0.312	0.057	0.396	0.051	0.19	0.055	0.375	0.171	0.562	0.079	0.316	0.025	0	0	0	0	0	0
k__Bacteria|p__Firmicutes|c__Negativicutes|o__Veillonellales|f__Veillonellaceae|g__Veillonella|s__Veillonella_parvula	0.196	0.229	0.253	0.054	0.238	0.026	0.312	0.196	0.688	0.074	0.632	1.151	0	0	0	0	0	0
k__Bacteria|p__Bacteroidetes|c__Bacteroidia|o__Bacteroidales|f__Bacteroidaceae|g__Bacteroides|s__Bacteroides_eggerthii	0.138	4.2	0.121	4.066	0.119	6.526	0.281	3.168	0.375	9.202	0	0	0	0	0	0	0.008	0.329
k__Bacteria|p__Firmicutes|c__Negativicutes|o__Veillonellales|f__Veillonellaceae|g__Veillonella|s__Veillonella_atypica	0.101	0.029	0.176	0.027	0.095	0.039	0.266	0.207	0.25	0.018	0.263	0.256	0	0	0	0	0	0
k__Bacteria|p__Bacteroidetes|c__Bacteroidia|o__Bacteroidales|f__Bacteroidaceae|g__Bacteroides|s__Bacteroides_clarus	0.094	1.584	0.055	0.838	0.095	0.211	0.266	0.758	0.062	0.889	0	0	0	0	0	0	0	0
k__Bacteria|p__Bacteroidetes|c__Bacteroidia|o__Bacteroidales|f__Bacteroidaceae|g__Bacteroides|s__Bacteroides_coprocola	0.051	4.147	0.044	6.027	0.119	3.567	0.172	0.917	0.375	2.713	0	0	0	0	0	0	0.322	1.077
k__Bacteria|p__Firmicutes|c__Negativicutes|o__Veillonellales|f__Veillonellaceae|g__Veillonella|s__Veillonella_dispar	0.159	0.021	0.297	0.014	0.119	0.027	0.266	0.101	0.188	0.05	0.211	2.344	0	0	0	0	0	0
k__Bacteria|p__Proteobacteria|c__Gammaproteobacteria|o__Pasteurellales|f__Pasteurellaceae|g__Haemophilus|s__Haemophilus_sp_HMSC71H05	0.188	0.021	0.187	0.012	0.095	0.039	0.203	0.109	0.188	0.023	0.263	0.031	0	0	0	0	0	0
k__Bacteria|p__Firmicutes|c__Negativicutes|o__Veillonellales|f__Veillonellaceae|g__Veillonella|s__Veillonella_infantium	0.072	0.007	0.121	0.005	0.095	0.01	0.156	0.073	0.25	0.026	0.105	2.312	0	0	0	0	0	0
k__Bacteria|p__Actinobacteria|c__Actinobacteria|o__Bifidobacteriales|f__Bifidobacteriaceae|g__Bifidobacterium|s__Bifidobacterium_catenulatum	0.072	0.02	0.044	0.048	0.024	0.015	0.172	0.1	0.188	0.566	0	0	0	0	0	0	0	0
k__Bacteria|p__Firmicutes|c__Bacilli|o__Lactobacillales|f__Streptococcaceae|g__Streptococcus|s__Streptococcus_parasanguinis	0.254	0.031	0.407	0.018	0.214	0.011	0.578	0.151	0.5	0.277	0.526	0.059	0	0	0	0	0	0
k__Bacteria|p__Bacteroidetes|c__Bacteroidia|o__Bacteroidales|f__Bacteroidaceae|g__Bacteroides|s__Bacteroides_sp_CAG_144	0.029	1.373	0.033	1.099	0.048	3.059	0.297	0.989	0.562	0.43	0	0	0	0	0	0	0.017	0.339
k__Bacteria|p__Firmicutes|c__Clostridia|o__Clostridiales|f__Peptostreptococcaceae|g__Intestinibacter|s__Intestinibacter_bartlettii	0.145	0.06	0.088	0.028	0.048	0.015	0.422	0.063	0.562	0.037	0.737	0.342	0	0	0	0	0	0
k__Bacteria|p__Firmicutes|c__Clostridia|o__Clostridiales|f__Clostridiaceae|g__Clostridium|s__Clostridium_celatum	0	0	0	0	0	0	0.016	0.058	0.062	0.053	0	0	0	0	0	0	0.025	0.036
k__Bacteria|p__Firmicutes|c__Erysipelotrichia|o__Erysipelotrichales|f__Erysipelotrichaceae|g__Turicibacter|s__Turicibacter_sanguinis	0.109	0.042	0.088	0.024	0.071	0.029	0.219	0.071	0.125	0.009	0.421	0.103	0	0	0	0	0.174	0.511
k__Bacteria|p__Firmicutes|c__Negativicutes|o__Veillonellales|f__Veillonellaceae|g__Veillonella|s__Veillonella_sp_T11011_6	0.014	0.003	0.033	0.003	0.048	0.012	0.094	0.059	0.125	0.022	0.211	1.722	0	0	0	0	0	0
k__Bacteria|p__Firmicutes|c__Negativicutes|o__Veillonellales|f__Veillonellaceae|g__Megasphaera|s__Megasphaera_micronuciformis	0.014	0.151	0.022	0.009	0	0	0.031	0.013	0.062	0.005	0.105	0.26	0	0	0	0	0	0
k__Bacteria|p__Proteobacteria|c__Gammaproteobacteria|o__Pasteurellales|f__Pasteurellaceae|g__Aggregatibacter|s__Aggregatibacter_segnis	0	0	0.011	0.006	0	0	0.016	0.021	0	0	0	0	0	0	0	0	0	0
k__Bacteria|p__Firmicutes|c__Negativicutes|o__Veillonellales|f__Veillonellaceae|g__Veillonella|s__Veillonella_rodentium	0	0	0	0	0	0	0.031	0.017	0	0	0.053	0.198	0	0	0	0	0	0
k__Bacteria|p__Bacteroidetes|c__Bacteroidia|o__Bacteroidales|f__Bacteroidaceae|g__Bacteroides|s__Bacteroides_finegoldii	0.232	4.226	0.264	2.684	0.19	3.515	0.219	1.805	0.312	0.169	0.105	9.794	0.067	14.364	0	0	0.008	0.196
k__Bacteria|p__Firmicutes|c__Negativicutes|o__Veillonellales|f__Veillonellaceae|g__Veillonella|s__Veillonella_denticariosi	0	0	0	0	0	0	0.031	0.008	0	0	0	0	0	0	0	0	0	0
k__Bacteria|p__Firmicutes|c__Negativicutes|o__Veillonellales|f__Veillonellaceae|g__Veillonella|s__Veillonella_tobetsuensis	0	0	0	0	0.024	0.004	0.016	0.016	0	0	0.053	0.162	0	0	0	0	0	0
k__Bacteria|p__Bacteroidetes|c__Bacteroidia|o__Bacteroidales|f__Bacteroidaceae|g__Bacteroides|s__Bacteroides_intestinalis	0.217	1.109	0.198	2.51	0.214	1.332	0.266	3.4	0.062	0.011	0.053	0.052	0	0	0.156	7.006	0	0
k__Bacteria|p__Proteobacteria|c__Epsilonproteobacteria|o__Campylobacterales|f__Campylobacteraceae|g__Campylobacter|s__Campylobacter_concisus	0	0	0	0	0	0	0.016	0.009	0	0	0.053	0.063	0	0	0	0	0	0
k__Bacteria|p__Bacteroidetes|c__Bacteroidia|o__Bacteroidales|f__Barnesiellaceae|g__Coprobacter|s__Coprobacter_secundus	0.123	0.286	0.121	0.195	0.071	0.097	0.391	0.071	0.062	0.11	0.053	0.048	0	0	0	0	0.033	0.068
k__Bacteria|p__Actinobacteria|c__Actinobacteria|o__Bifidobacteriales|f__Bifidobacteriaceae|g__Aeriscardovia|s__Aeriscardovia_aeriphila	0.022	0.005	0	0	0	0	0.562	0.015	0.625	0.037	0	0	0	0	0	0	0.264	0.526
k__Bacteria|p__Firmicutes|c__Clostridia|o__Clostridiales|f__Clostridiaceae|g__Clostridium|s__Clostridium_sp_CAG_167	0.217	0.099	0.198	0.172	0.119	0.086	0.469	0.26	0.25	0.984	0.316	0.214	0	0	0	0	0	0
k__Bacteria|p__Firmicutes|c__Negativicutes|o__Veillonellales|f__Veillonellaceae|g__Veillonella|s__Veillonella_rogosae	0.007	0.002	0.011	0.003	0	0	0.047	0.013	0.188	0.004	0.105	0.045	0	0	0	0	0	0
k__Bacteria|p__Actinobacteria|c__Coriobacteriia|o__Coriobacteriales|f__Atopobiaceae|g__Olsenella|s__Olsenella_scatoligenes	0.007	0.001	0.033	0.015	0	0	0.719	0.008	0.625	0.018	0.579	0.017	0.933	13.959	0.099	0.015	0.62	0.227
k__Bacteria|p__Proteobacteria|c__Gammaproteobacteria|o__Pasteurellales|f__Pasteurellaceae|g__Haemophilus|s__Haemophilus_sputorum	0	0	0.011	0.009	0.024	0.017	0.031	0.003	0	0	0	0	0	0	0	0	0	0
k__Bacteria|p__Firmicutes|c__Clostridia|o__Clostridiales|f__Lachnospiraceae|g__Blautia|s__Ruminococcus_gnavus	0.507	0.407	0.495	0.176	0.524	0.51	0.188	0.559	0.438	1.137	0.158	0.123	0	0	0	0	0	0
k__Bacteria|p__Firmicutes|c__Clostridia|o__Clostridiales|f__Lachnospiraceae|g__Roseburia|s__Roseburia_sp_CAG_303	0.058	0.058	0.033	0.22	0.167	0.04	0.297	0.244	0.125	0.083	0.263	0.03	0	0	0	0	0	0
k__Bacteria|p__Firmicutes|c__Bacilli|o__Bacillales|f__Bacillales_unclassified|g__Gemella|s__Gemella_morbillorum	0.007	0.021	0.011	0.022	0	0	0.016	0.001	0.062	0.021	0	0	0	0	0	0	0	0
k__Bacteria|p__Proteobacteria|c__Proteobacteria_unclassified|o__Proteobacteria_unclassified|f__Proteobacteria_unclassified|g__Proteobacteria_unclassified|s__Proteobacteria_bacterium_CAG_139	0.58	0.924	0.484	0.995	0.548	0.449	0.719	0.506	0.375	0.115	0	0	0	0	0.305	0.178	0.025	1.223
k__Bacteria|p__Firmicutes|c__Clostridia|o__Clostridiales|f__Clostridiaceae|g__Clostridium|s__Clostridium_disporicum	0.043	0.086	0.055	0.027	0.048	0.022	0.156	0.044	0.25	0.024	0.368	0.162	0	0	0	0	0.017	0.124
k__Bacteria|p__Firmicutes|c__Clostridia|o__Clostridiales|f__Lachnospiraceae|g__Lachnoclostridium|s__Clostridium_saccharolyticum	0.051	0.023	0.044	0.006	0	0	0.297	0.039	0.312	0.234	0	0	0	0	0	0	0.066	6.5
k__Bacteria|p__Bacteroidetes|c__Bacteroidia|o__Bacteroidales|f__Barnesiellaceae|g__Barnesiella|s__Barnesiella_sp_An22	0.014	1.576	0	0	0	0	0.016	10.725	0	0	0	0	0	0	0	0	0.579	0.56
k__Bacteria|p__Firmicutes|c__Negativicutes|o__Veillonellales|f__Veillonellaceae|g__Dialister|s__Dialister_invisus	0.384	0.451	0.374	0.217	0.357	0.151	0.359	1.012	0.375	0.505	0	0	0	0	0	0	0	0
k__Bacteria|p__Bacteroidetes|c__Bacteroidia|o__Bacteroidales|f__Rikenellaceae|g__Alistipes|s__Alistipes_onderdonkii	0.167	0.275	0.066	0.606	0.071	0.045	0.078	0.408	0.062	0.004	0	0	0	0	0	0	0	0
k__Bacteria|p__Firmicutes|c__Clostridia|o__Clostridiales|f__Lachnospiraceae|g__Eisenbergiella|s__Eisenbergiella_tayi	0.123	0.179	0.143	0.137	0.143	0.145	0.266	0.057	0.125	0.033	0	0	0	0	0	0	0	0
k__Bacteria|p__Firmicutes|c__Clostridia|o__Clostridiales|f__Clostridiaceae|g__Clostridium|s__Clostridium_sp_CAG_411	0.007	0.067	0	0	0	0	0.188	0.382	0	0	0.053	0.011	0.133	3.878	0	0	0	0
k__Bacteria|p__Firmicutes|c__Clostridia|o__Clostridiales|f__Ruminococcaceae|g__Anaeromassilibacillus|s__Anaeromassilibacillus_sp_An250	0.145	0.018	0.253	0.023	0.119	0.027	0.656	0.057	0.438	0.038	0	0	0	0	0	0	0.446	0.29
k__Bacteria|p__Firmicutes|c__Bacilli|o__Lactobacillales|f__Streptococcaceae|g__Streptococcus|s__Streptococcus_thermophilus	0.152	0.037	0.099	0.022	0.071	0.021	0.391	0.084	0.25	0.223	0	0	0	0	0.014	0.125	0	0
k__Bacteria|p__Firmicutes|c__Clostridia|o__Clostridiales|f__Lachnospiraceae|g__Lachnoclostridium|s__Clostridium_bolteae	0.188	0.045	0.22	0.018	0.19	0.015	0.25	0.09	0.5	0.182	0	0	0	0	0	0	0	0
k__Bacteria|p__Actinobacteria|c__Actinobacteria|o__Micrococcales|f__Micrococcaceae|g__Rothia|s__Rothia_mucilaginosa	0.007	0.019	0.143	0.006	0.048	0.003	0.078	0.02	0.125	0.01	0.105	0.007	0	0	0	0	0	0
k__Bacteria|p__Synergistetes|c__Synergistia|o__Synergistales|f__Synergistaceae|g__Fretibacterium|s__Fretibacterium_fastidiosum	0.043	0.002	0.044	0.003	0	0	0.828	0.01	0.75	0.008	0.053	0.005	0	0	0.418	0.063	0	0
k__Bacteria|p__Firmicutes|c__Clostridia|o__Clostridiales|f__Eubacteriaceae|g__Eubacterium|s__Eubacterium_sp_CAG_274	0.101	0.073	0.099	0.05	0.071	0.047	0.422	0.227	0.25	0.317	0.053	2.342	0.067	0.191	0	0	0	0
k__Bacteria|p__Firmicutes|c__Clostridia|o__Clostridiales|f__Clostridiales_unclassified|g__Intestinimonas|s__Intestinimonas_butyriciproducens	0.399	0.043	0.571	0.043	0.381	0.027	0.484	0.046	0.125	0.052	0	0	0	0	0	0	0	0
k__Bacteria|p__Bacteroidetes|c__Bacteroidia|o__Bacteroidales|f__Barnesiellaceae|g__Barnesiella|s__Barnesiella_viscericola	0	0	0	0	0	0	0.016	0.003	0	0	0	0	0	0	0	0	0.405	0.347
k__Bacteria|p__Actinobacteria|c__Coriobacteriia|o__Eggerthellales|f__Eggerthellaceae|g__Gordonibacter|s__Gordonibacter_pamelaeae	0.29	0.02	0.462	0.026	0.524	0.014	0.609	0.067	0.75	0.037	0	0	0	0	0.17	0.022	0.041	0.009
k__Bacteria|p__Firmicutes|c__Clostridia|o__Clostridiales|f__Eubacteriaceae|g__Eubacterium|s__Eubacterium_sp_OM08_24	0.029	0.013	0.011	0.005	0.048	0.001	0.266	0.051	0.188	0.003	0.263	0.011	0	0	0	0	0	0
k__Bacteria|p__Actinobacteria|c__Thermoleophilia|o__Thermoleophilales|f__Thermoleophilaceae|g__Thermoleophilum|s__Thermoleophilum_album	0	0	0	0	0	0	0.078	0.004	0.062	0.002	0	0	0	0	0	0	0	0
k__Bacteria|p__Actinobacteria|c__Coriobacteriia|o__Eggerthellales|f__Eggerthellaceae|g__Enterorhabdus|s__Enterorhabdus_caecimuris	0.014	0.002	0.011	0.006	0.024	0.006	0.609	0.011	0.625	0.007	0	0	0	0	0.922	3.818	0	0
k__Bacteria|p__Bacteroidetes|c__Bacteroidia|o__Bacteroidales|f__Barnesiellaceae|g__Barnesiella|s__Barnesiella_sp_An55	0	0	0	0	0	0	0.016	0.001	0	0	0	0	0	0	0	0	0.041	0.885
k__Bacteria|p__Firmicutes|c__Clostridia|o__Clostridiales|f__Eubacteriaceae|g__Eubacterium|s__Eubacterium_sp_CAG_180	0.138	2.053	0.154	0.69	0.071	0.397	0.359	4.456	0.438	3.746	0.421	1.006	0	0	0	0	0	0
k__Bacteria|p__Firmicutes|c__Negativicutes|o__Acidaminococcales|f__Acidaminococcaceae|g__Phascolarctobacterium|s__Phascolarctobacterium_faecium	0.471	0.498	0.549	0.3	0.524	0.408	0.109	0.465	0.125	0.646	0	0	0	0	0	0	0	0
k__Bacteria|p__Firmicutes|c__Clostridia|o__Clostridiales|f__Ruminococcaceae|g__Ruminococcus|s__Ruminococcus_callidus	0.123	0.037	0.121	0.031	0	0	0.141	0.079	0.25	0.064	0.421	0.049	0	0	0	0	0	0
k__Bacteria|p__Bacteroidetes|c__Bacteroidia|o__Bacteroidales|f__Bacteroidaceae|g__Bacteroides|s__Bacteroides_faecis	0.159	3.874	0.231	4.006	0.095	3.663	0.125	0.544	0.125	1.132	0	0	0	0	0	0	0	0
k__Bacteria|p__Bacteroidetes|c__Bacteroidia|o__Bacteroidales|f__Bacteroidaceae|g__Bacteroides|s__Bacteroides_faecis_CAG_32	0.109	1.666	0.11	0.605	0.048	1.683	0.109	0.069	0.062	1.578	0	0	0	0	0	0	0	0
k__Bacteria|p__Bacteroidetes|c__Bacteroidia|o__Bacteroidales|f__Prevotellaceae|g__Prevotella|s__Prevotella_sp_CAG_279	0.036	7.75	0.066	4.456	0.024	1.24	0.172	5.079	0.312	4.125	0.579	0.778	0	0	0	0	0	0
k__Bacteria|p__Firmicutes|c__Clostridia|o__Clostridiales|f__Clostridiales_unclassified|g__Monoglobus|s__Monoglobus_pectinilyticus	0.486	0.14	0.44	0.065	0.333	0.146	0.219	0.121	0.062	0.069	0	0	0	0	0	0	0	0
k__Bacteria|p__Bacteroidetes|c__Bacteroidia|o__Bacteroidales|f__Tannerellaceae|g__Parabacteroides|s__Parabacteroides_goldsteinii	0.167	0.279	0.099	0.12	0.262	0.342	0.25	0.291	0.062	0.072	0.053	0.015	0	0	0.574	1.897	0	0
k__Bacteria|p__Firmicutes|c__Firmicutes_unclassified|o__Firmicutes_unclassified|f__Firmicutes_unclassified|g__Firmicutes_unclassified|s__Firmicutes_bacterium_CAG_145	0.174	0.074	0.253	0.04	0.143	0.275	0.328	0.311	0.438	0.821	0	0	0	0	0	0	0	0
k__Bacteria|p__Firmicutes|c__Clostridia|o__Clostridiales|f__Clostridiaceae|g__Clostridium|s__Clostridium_sp_CAG_299	0.101	0.098	0.055	0.037	0.095	0.047	0.172	0.097	0.062	0.027	0	0	0	0	0	0	0	0
k__Bacteria|p__Firmicutes|c__Clostridia|o__Clostridiales|f__Lachnospiraceae|g__Anaerotignum|s__Anaerotignum_lactatifermentans	0.203	0.119	0.187	0.036	0.119	0.043	0.062	0.086	0.062	0.076	0	0	0	0	0	0	0.504	0.724
k__Bacteria|p__Firmicutes|c__Bacilli|o__Lactobacillales|f__Lactobacillaceae|g__Lactobacillus|s__Lactobacillus_mucosae	0	0	0	0	0	0	0.031	0.021	0.062	0.083	0	0	0	0	0	0	0	0
k__Bacteria|p__Proteobacteria|c__Deltaproteobacteria|o__Desulfovibrionales|f__Desulfovibrionaceae|g__Desulfovibrionaceae_unclassified|s__Desulfovibrionaceae_bacterium	0.058	0.07	0.044	0.318	0	0	0.109	0.141	0.188	0.057	0.158	0.007	0	0	0.128	0.014	0	0
k__Eukaryota|p__Ascomycota|c__Saccharomycetes|o__Saccharomycetales|f__Saccharomycetaceae|g__Saccharomyces|s__Saccharomyces_cerevisiae	0	0	0	0	0	0	0.016	0.036	0	0	0	0	0	0	0	0	0	0
k__Bacteria|p__Firmicutes|c__Clostridia|o__Clostridiales|f__Ruminococcaceae|g__Anaerotruncus|s__Anaerotruncus_colihominis	0.188	0.027	0.275	0.08	0.31	0.041	0.203	0.037	0.312	0.048	0	0	0	0	0.021	0.034	0.041	0.841
k__Bacteria|p__Firmicutes|c__Clostridia|o__Clostridiales|f__Lachnospiraceae|g__Blautia|s__Blautia_hydrogenotrophica	0.167	0.019	0.209	0.018	0.167	0.044	0.078	0.015	0.125	0.01	0	0	0	0	0	0	0	0
k__Bacteria|p__Firmicutes|c__Erysipelotrichia|o__Erysipelotrichales|f__Erysipelotrichaceae|g__Faecalitalea|s__Faecalitalea_cylindroides	0.051	0.057	0.044	0.054	0	0	0.156	0.115	0.188	0.045	0	0	0	0	0	0	0.645	0.71
k__Bacteria|p__Firmicutes|c__Bacilli|o__Lactobacillales|f__Streptococcaceae|g__Streptococcus|s__Streptococcus_mitis	0.174	0.026	0.198	0.026	0.167	0.011	0.094	0.024	0.312	0.05	0.263	0.022	0	0	0	0	0	0
k__Bacteria|p__Actinobacteria|c__Actinobacteria|o__Actinomycetales|f__Actinomycetaceae|g__Actinomyces|s__Actinomyces_sp_oral_taxon_181	0	0	0.011	0.002	0	0	0.031	0.009	0	0	0.053	0.002	0	0	0	0	0	0
k__Bacteria|p__Firmicutes|c__Bacilli|o__Bacillales|f__Bacillales_unclassified|g__Gemella|s__Gemella_sanguinis	0.007	0.002	0.033	0.004	0	0	0.125	0.009	0.25	0.038	0.263	0.023	0	0	0	0	0	0
k__Bacteria|p__Firmicutes|c__Clostridia|o__Clostridiales|f__Eubacteriaceae|g__Eubacteriaceae_unclassified|s__Eubacteriaceae_bacterium_CHKCI005	0	0	0	0	0	0	0.094	0.015	0	0	0	0	0	0	0	0	0	0
k__Bacteria|p__Firmicutes|c__Clostridia|o__Clostridiales|f__Clostridiales_Family_XIII_Incertae_Sedis|g__Mogibacterium|s__Mogibacterium_diversum	0.007	0.001	0	0	0	0	0.031	0.003	0.062	0.008	0.421	0.04	0	0	0	0	0	0
k__Bacteria|p__Firmicutes|c__Clostridia|o__Clostridiales|f__Oscillospiraceae|g__Oscillibacter|s__Oscillibacter_sp_PC13	0.014	0.007	0.011	0.004	0.024	0.002	0.141	0.007	0.062	0.004	0	0	0	0	0	0	0	0
k__Bacteria|p__Firmicutes|c__Clostridia|o__Clostridiales|f__Christensenellaceae|g__Christensenella|s__Christensenella_minuta	0.036	0.089	0.088	0.016	0.048	0.007	0.078	0.005	0.062	0.002	0	0	0	0	0	0	0	0
k__Bacteria|p__Actinobacteria|c__Coriobacteriia|o__Eggerthellales|f__Eggerthellaceae|g__Eggerthella|s__Eggerthella_lenta	0.21	0.029	0.374	0.052	0.333	0.024	0.219	0.069	0.5	0.067	0.053	0.001	0	0	0	0	0	0
k__Bacteria|p__Bacteroidetes|c__Bacteroidia|o__Bacteroidales|f__Prevotellaceae|g__Prevotella|s__Prevotella_copri	0.159	30.52	0.473	12.95	0.071	12.255	0.266	23.66	0.312	38.616	1	17.4	0.067	2.587	0	0	0.041	0.782
k__Bacteria|p__Actinobacteria|c__Actinobacteria|o__Actinomycetales|f__Actinomycetaceae|g__Actinomyces|s__Actinomyces_sp_ICM47	0	0	0.055	0.006	0	0	0.031	0.009	0	0	0.053	0.031	0	0	0	0	0	0
k__Bacteria|p__Firmicutes|c__Negativicutes|o__Acidaminococcales|f__Acidaminococcaceae|g__Phascolarctobacterium|s__Phascolarctobacterium_sp_CAG_266	0.036	0.355	0.055	0.399	0.024	0.352	0.328	1.64	0.188	1.131	0	0	0	0	0	0	0.769	6.278
k__Bacteria|p__Firmicutes|c__Clostridia|o__Clostridiales|f__Lachnospiraceae|g__Coprococcus|s__Coprococcus_eutactus	0.297	0.718	0.22	0.382	0.143	1.251	0.516	1.879	0.125	0.191	0.684	2.377	0	0	0	0	0	0
k__Bacteria|p__Lentisphaerae|c__Lentisphaeria|o__Victivallales|f__Victivallaceae|g__Victivallis|s__Victivallis_vadensis	0.08	0.101	0.099	0.028	0.024	0.093	0.281	0.047	0.062	0.002	0.421	0.051	0	0	0	0	0.091	0.063
k__Bacteria|p__Actinobacteria|c__Actinobacteria|o__Bifidobacteriales|f__Bifidobacteriaceae|g__Bifidobacterium|s__Bifidobacterium_pseudocatenulatum	0.232	0.104	0.11	0.096	0.286	0.146	0.219	0.325	0.375	0.123	0	0	0	0	0	0	0	0
k__Bacteria|p__Bacteroidetes|c__Bacteroidia|o__Bacteroidales|f__Tannerellaceae|g__Parabacteroides|s__Parabacteroides_johnsonii	0.116	1.319	0.033	0.424	0.119	1.514	0.219	0.711	0.438	1.16	0.053	0.004	0	0	0	0	0.017	0.188
k__Bacteria|p__Firmicutes|c__Clostridia|o__Clostridiales|f__Clostridiaceae|g__Clostridium|s__Clostridium_sp_CAG_242	0.036	0.034	0.066	0.172	0.024	0.057	0.156	0.087	0.375	0.341	0	0	0	0	0	0	0.264	0.576
k__Bacteria|p__Bacteroidetes|c__Bacteroidia|o__Bacteroidales|f__Odoribacteraceae|g__Odoribacter|s__Odoribacter_laneus	0.043	1.193	0.055	0.544	0	0	0.031	0.029	0	0	0	0	0	0	0.071	0.097	0	0
k__Bacteria|p__Firmicutes|c__Clostridia|o__Clostridiales|f__Lachnospiraceae|g__Dorea|s__Dorea_sp_CAG_317	0.123	0.085	0.132	0.045	0.048	0.081	0.078	0.175	0	0	0	0	0	0	0	0	0	0
k__Bacteria|p__Firmicutes|c__Clostridia|o__Clostridiales|f__Clostridiaceae|g__Clostridium|s__Clostridium_bolteae_CAG_59	0.051	0.027	0.055	0.03	0.024	0.021	0.031	0.017	0.188	0.088	0	0	0	0	0	0	0	0
k__Bacteria|p__Firmicutes|c__Clostridia|o__Clostridiales|f__Lachnospiraceae|g__Eisenbergiella|s__Eisenbergiella_massiliensis	0.13	0.047	0.198	0.109	0.167	0.028	0.203	0.013	0.125	0.015	0	0	0	0	0	0	0	0
k__Bacteria|p__Firmicutes|c__Clostridia|o__Clostridiales|f__Lachnospiraceae|g__Lachnoclostridium|s__Lachnoclostridium_sp_An138	0.043	0.006	0.066	0.011	0	0	0.109	0.007	0.125	0.014	0	0	0	0	0	0	0.562	0.401
k__Bacteria|p__Firmicutes|c__Bacilli|o__Lactobacillales|f__Streptococcaceae|g__Lactococcus|s__Lactococcus_lactis	0.072	0.043	0.077	0.013	0.024	0.002	0.078	0.018	0.062	0.085	0.895	0.749	0	0	0.028	1.564	0.099	0.227
k__Bacteria|p__Firmicutes|c__Clostridia|o__Clostridiales|f__Lachnospiraceae|g__Lachnoclostridium|s__Lachnoclostridium_sp_An131	0.022	0.007	0.011	0.001	0	0	0.047	0.017	0.125	0.023	0	0	0	0	0	0	0.488	0.309
k__Bacteria|p__Firmicutes|c__Clostridia|o__Clostridiales|f__Lachnospiraceae|g__Lachnoclostridium|s__Clostridium_asparagiforme	0.014	0.003	0.077	0.011	0.024	0.022	0.156	0.014	0.062	0.026	0	0	0	0	0	0	0	0
k__Bacteria|p__Firmicutes|c__Clostridia|o__Clostridiales|f__Clostridiaceae|g__Hungatella|s__Hungatella_hathewayi	0.058	0.08	0.132	0.037	0.167	0.028	0.141	0.115	0.312	0.019	0.105	0.358	0	0	0	0	0	0
k__Bacteria|p__Firmicutes|c__Clostridia|o__Clostridiales|f__Eubacteriaceae|g__Eubacterium|s__Eubacterium_sp_CAG_786	0	0	0	0	0	0	0.078	3.212	0	0	0.211	0.258	0	0	0	0	0	0
k__Bacteria|p__Firmicutes|c__Clostridia|o__Clostridiales|f__Clostridiales_unclassified|g__Clostridiales_unclassified|s__Clostridiales_bacterium_CHKCI006	0	0	0	0	0	0	0.016	0.091	0	0	0	0	0	0	0	0	0.471	0.355
k__Bacteria|p__Firmicutes|c__Bacilli|o__Lactobacillales|f__Streptococcaceae|g__Streptococcus|s__Streptococcus_sanguinis	0.022	0.006	0.011	0.002	0	0	0.047	0.057	0	0	0	0	0	0	0	0	0	0
k__Bacteria|p__Actinobacteria|c__Actinobacteria|o__Actinomycetales|f__Actinomycetaceae|g__Actinomyces|s__Actinomyces_sp_HMSC035G02	0	0	0.011	0.005	0	0	0.031	0.011	0	0	0.158	0.009	0	0	0	0	0	0
k__Bacteria|p__Firmicutes|c__Clostridia|o__Clostridiales|f__Ruminococcaceae|g__Ruminococcus|s__Ruminococcus_obeum_CAG_39	0.065	0.024	0.11	0.003	0.071	0.007	0.109	0.063	0.062	0.004	0.105	0.047	0	0	0	0	0	0
k__Bacteria|p__Actinobacteria|c__Actinobacteria|o__Actinomycetales|f__Actinomycetaceae|g__Actinomyces|s__Actinomyces_odontolyticus	0	0	0.011	0.012	0	0	0.031	0.028	0	0	0.474	0.024	0	0	0	0	0	0
k__Bacteria|p__Firmicutes|c__Bacilli|o__Lactobacillales|f__Streptococcaceae|g__Streptococcus|s__Streptococcus_gordonii	0.022	0.01	0	0	0	0	0.094	0.036	0.312	0.037	0.158	0.038	0	0	0	0	0	0
k__Bacteria|p__Firmicutes|c__Bacilli|o__Lactobacillales|f__Streptococcaceae|g__Streptococcus|s__Streptococcus_australis	0.007	0.015	0	0	0.024	0.007	0.047	0.033	0.125	0.13	0.158	0.016	0	0	0	0	0	0
k__Bacteria|p__Actinobacteria|c__Coriobacteriia|o__Eggerthellales|f__Eggerthellaceae|g__Denitrobacterium|s__Denitrobacterium_detoxificans	0	0	0	0	0	0	0.062	0.005	0.125	0.003	0	0	0	0	0	0	0	0
k__Bacteria|p__Firmicutes|c__Bacilli|o__Lactobacillales|f__Streptococcaceae|g__Streptococcus|s__Streptococcus_vestibularis	0	0	0	0	0	0	0.062	0.367	0.125	0.434	0.105	1.68	0	0	0	0	0	0
k__Bacteria|p__Firmicutes|c__Bacilli|o__Lactobacillales|f__Streptococcaceae|g__Streptococcus|s__Streptococcus_sp_A12	0.014	0.018	0.011	0.001	0.024	0.011	0.062	0.007	0.125	0.014	0.158	0.018	0	0	0	0	0	0
k__Bacteria|p__Actinobacteria|c__Coriobacteriia|o__Coriobacteriales|f__Atopobiaceae|g__Atopobium|s__Atopobium_rimae	0	0	0	0	0	0	0.031	0.011	0	0	0	0	0	0	0	0	0	0
k__Bacteria|p__Firmicutes|c__Negativicutes|o__Acidaminococcales|f__Acidaminococcaceae|g__Acidaminococcus|s__Acidaminococcus_fermentans	0	0	0.011	0.391	0	0	0.047	0.361	0.062	0.369	0	0	0	0	0	0	0	0
k__Bacteria|p__Actinobacteria|c__Actinobacteria|o__Bifidobacteriales|f__Bifidobacteriaceae|g__Bifidobacterium|s__Bifidobacterium_bifidum	0.167	0.053	0.121	0.065	0.19	0.134	0.156	0.215	0.562	0.378	0	0	0	0	0	0	0	0
k__Bacteria|p__Proteobacteria|c__Gammaproteobacteria|o__Enterobacterales|f__Hafniaceae|g__Hafnia|s__Hafnia_paralvei	0.007	0.013	0	0	0	0	0.016	0.015	0	0	0	0	0	0	0	0	0	0
k__Bacteria|p__Firmicutes|c__Erysipelotrichia|o__Erysipelotrichales|f__Erysipelotrichaceae|g__Massiliomicrobiota|s__Massiliomicrobiota_timonensis	0.014	0.012	0.022	0.011	0	0	0.047	0.022	0	0	0	0	0	0	0	0	0.364	0.125
k__Bacteria|p__Proteobacteria|c__Deltaproteobacteria|o__Desulfovibrionales|f__Desulfovibrionaceae|g__Desulfovibrio|s__Desulfovibrio_piger	0.08	0.076	0.088	0.09	0.048	0.086	0.219	0.409	0.312	0.377	0.526	0.097	0	0	0	0	0.744	3.168
k__Bacteria|p__Firmicutes|c__Clostridia|o__Clostridiales|f__Clostridiaceae|g__Clostridium|s__Clostridium_sp_CAG_253	0.101	0.168	0.044	0.107	0.071	0.026	0.312	0.185	0.062	0.019	0.211	0.136	0.067	0.902	0	0	0	0
k__Bacteria|p__Firmicutes|c__Negativicutes|o__Veillonellales|f__Veillonellaceae|g__Dialister|s__Dialister_succinatiphilus	0.007	2.283	0.022	0.213	0	0	0.062	0.404	0.125	1.013	0	0	0	0	0	0	0	0
k__Bacteria|p__Firmicutes|c__Firmicutes_unclassified|o__Firmicutes_unclassified|f__Firmicutes_unclassified|g__Firmicutes_unclassified|s__Firmicutes_bacterium_CAG_555	0	0	0	0	0	0	0.109	2.526	0.062	1.686	0.316	0.549	0.333	3.062	0	0	0	0
k__Eukaryota|p__Eukaryota_unclassified|c__Eukaryota_unclassified|o__Eukaryota_unclassified|f__Eukaryota_unclassified|g__Blastocystis|s__Blastocystis_sp_subtype_1	0.007	0.163	0.022	0.785	0.024	0.004	0.047	0.274	0	0	0.316	0.031	0	0	0	0	0	0
k__Bacteria|p__Firmicutes|c__Firmicutes_unclassified|o__Firmicutes_unclassified|f__Firmicutes_unclassified|g__Firmicutes_unclassified|s__Firmicutes_bacterium_CAG_170	0.022	0.012	0.033	0.013	0.048	0.018	0.594	0.808	0.312	0.459	0.526	0.166	0	0	0	0	0	0
k__Bacteria|p__Fusobacteria|c__Fusobacteriia|o__Fusobacteriales|f__Fusobacteriaceae|g__Fusobacterium|s__Fusobacterium_sp_CAG_439	0	0	0.022	0.048	0	0	0.172	1.193	0	0	0	0	0	0	0	0	0	0
k__Bacteria|p__Bacteroidetes|c__Bacteroidia|o__Bacteroidales|f__Rikenellaceae|g__Alistipes|s__Alistipes_timonensis	0.08	0.106	0.055	0.009	0.024	0.991	0.078	0.125	0.062	0.037	0	0	0	0	0.064	0.429	0	0
k__Bacteria|p__Firmicutes|c__Bacilli|o__Lactobacillales|f__Lactobacillaceae|g__Lactobacillus|s__Lactobacillus_sakei	0	0	0	0	0	0	0.047	0.014	0.062	0.017	0	0	0	0	0	0	0.083	0.038
k__Bacteria|p__Bacteroidetes|c__Bacteroidia|o__Bacteroidales|f__Rikenellaceae|g__Alistipes|s__Alistipes_sp_CAG_831	0	0	0	0	0	0	0.047	13.583	0.062	0.37	0	0	0	0	0	0	0.603	1.257
k__Bacteria|p__Firmicutes|c__Negativicutes|o__Veillonellales|f__Veillonellaceae|g__Dialister|s__Dialister_sp_CAG_357	0.072	0.809	0.055	0.549	0.095	2.41	0.078	2.857	0.062	1.923	0	0	0	0	0	0	0	0
k__Bacteria|p__Firmicutes|c__Clostridia|o__Clostridiales|f__Clostridiaceae|g__Clostridium|s__Clostridium_sp_CAG_678	0	0	0.011	0.058	0	0	0.047	2.215	0.062	1.554	0	0	0	0	0	0	0.116	0.512
k__Bacteria|p__Bacteroidetes|c__Bacteroidia|o__Bacteroidales|f__Bacteroidaceae|g__Bacteroides|s__Bacteroides_stercoris	0.565	8.218	0.648	7.099	0.476	16.74	0.281	2.319	0.375	6.361	0.158	0.094	0	0	0	0	0	0
k__Bacteria|p__Firmicutes|c__Erysipelotrichia|o__Erysipelotrichales|f__Erysipelotrichaceae|g__Coprobacillus|s__Coprobacillus_cateniformis	0.109	0.115	0.055	0.333	0.071	0.023	0.141	0.15	0.062	0.091	0.105	0.047	0	0	0	0	0	0
k__Bacteria|p__Firmicutes|c__Clostridia|o__Clostridiales|f__Ruminococcaceae|g__Pseudoflavonifractor|s__Pseudoflavonifractor_sp_An184	0.014	0.008	0.044	0.009	0.048	0.012	0.219	0.044	0.312	0.068	0	0	0	0	0	0	0.694	1.674
k__Bacteria|p__Firmicutes|c__Erysipelotrichia|o__Erysipelotrichales|f__Erysipelotrichaceae|g__Faecalicoccus|s__Faecalicoccus_pleomorphus	0.022	0.055	0	0	0.024	0.023	0.047	0.078	0.125	0.041	0	0	0	0	0	0	0.331	0.259
k__Bacteria|p__Firmicutes|c__Clostridia|o__Clostridiales|f__Lachnospiraceae|g__Butyrivibrio|s__Butyrivibrio_sp_CAG_318	0.022	0.773	0.022	0.13	0.024	0.574	0.172	5.324	0.25	2.712	0.789	2.893	0	0	0	0	0	0
k__Bacteria|p__Firmicutes|c__Clostridia|o__Clostridiales|f__Ruminococcaceae|g__Flavonifractor|s__Flavonifractor_sp_An10	0.007	0.001	0	0	0	0	0.062	0.021	0.062	0.013	0	0	0	0	0	0	0.628	0.596
k__Bacteria|p__Firmicutes|c__Erysipelotrichia|o__Erysipelotrichales|f__Erysipelotrichaceae|g__Erysipelatoclostridium|s__Clostridium_spiroforme	0.478	0.08	0.407	0.048	0.238	0.018	0.281	0.049	0.188	0.059	0	0	0	0	0	0	0.331	0.384
k__Bacteria|p__Firmicutes|c__Erysipelotrichia|o__Erysipelotrichales|f__Erysipelotrichaceae|g__Erysipelatoclostridium|s__Clostridium_innocuum	0.08	0.049	0.121	0.048	0.167	0.062	0.094	0.018	0.312	0.871	0.105	2.069	0	0	0	0	0.017	0.785
k__Bacteria|p__Firmicutes|c__Bacilli|o__Lactobacillales|f__Lactobacillaceae|g__Lactobacillus|s__Lactobacillus_acidophilus	0.014	0.069	0	0	0	0	0.031	0.005	0.062	0.318	0	0	0	0	0.021	0.107	0	0
k__Bacteria|p__Firmicutes|c__Clostridia|o__Clostridiales|f__Lachnospiraceae|g__Tyzzerella|s__Tyzzerella_nexilis	0.065	0.04	0.044	0.026	0.071	0.007	0.016	0.001	0.062	0.004	0.105	0.007	0	0	0	0	0	0
k__Bacteria|p__Firmicutes|c__Clostridia|o__Clostridiales|f__Lachnospiraceae|g__Lachnoclostridium|s__Clostridium_clostridioforme	0.094	0.014	0.066	0.04	0.167	0.013	0.109	0.07	0.312	0.523	0.053	2.82	0	0	0	0	0	0
k__Bacteria|p__Firmicutes|c__Clostridia|o__Clostridiales|f__Eubacteriaceae|g__Eubacterium|s__Eubacterium_dolichum_CAG_375	0.087	0.093	0.077	0.03	0.024	0.13	0.031	0.008	0.125	0.088	0	0	0	0	0	0	0	0
k__Bacteria|p__Firmicutes|c__Clostridia|o__Clostridiales|f__Lachnospiraceae|g__Lachnoclostridium|s__Clostridium_lavalense	0.08	0.027	0.099	0.02	0.048	0.002	0.156	0.034	0.188	0.015	0	0	0	0	0	0	0	0
k__Bacteria|p__Firmicutes|c__Erysipelotrichia|o__Erysipelotrichales|f__Erysipelotrichaceae|g__Absiella|s__Absiella_dolichum	0.08	0.108	0.066	0.04	0.024	0.116	0.031	0.004	0.125	0.077	0	0	0	0	0	0	0	0
k__Bacteria|p__Firmicutes|c__Clostridia|o__Clostridiales|f__Lachnospiraceae|g__Lachnoclostridium|s__Clostridium_aldenense	0	0	0.011	0.001	0	0	0.062	0.014	0.25	0.016	0.053	0.058	0	0	0	0	0	0
k__Bacteria|p__Firmicutes|c__Clostridia|o__Clostridiales|f__Lachnospiraceae|g__Blautia|s__Blautia_sp_CAG_257	0.188	0.08	0.253	0.096	0.214	0.042	0.109	0.101	0.312	1.368	0	0	0	0	0	0	0	0
k__Bacteria|p__Bacteroidetes|c__Bacteroidia|o__Bacteroidales|f__Prevotellaceae|g__Prevotella|s__Prevotella_sp_CAG_924	0	0	0	0	0	0	0.016	9.625	0	0	0	0	0	0	0	0	0.091	8.049
k__Bacteria|p__Firmicutes|c__Clostridia|o__Clostridiales|f__Ruminococcaceae|g__Ruminococcus|s__Ruminococcus_champanellensis	0.022	0.227	0.033	0.942	0	0	0.094	0.699	0.062	0.147	0.368	0.773	0.333	12.766	0	0	0	0
k__Bacteria|p__Firmicutes|c__Clostridia|o__Clostridiales|f__Eubacteriaceae|g__Eubacterium|s__Eubacterium_sp_CAG_251	0.152	2.228	0.121	0.17	0.095	0.108	0.25	0.707	0.312	1.107	0.895	2.098	0.2	0.69	0	0	0	0
k__Bacteria|p__Firmicutes|c__Clostridia|o__Clostridiales|f__Ruminococcaceae|g__Ruminococcus|s__Ruminococcus_sp_CAG_330	0.051	0.179	0.033	0.053	0.143	0.268	0.156	0.24	0.25	0.253	0.579	0.135	0	0	0	0	0	0
k__Bacteria|p__Firmicutes|c__Negativicutes|o__Acidaminococcales|f__Acidaminococcaceae|g__Acidaminococcus|s__Acidaminococcus_intestini	0.196	0.593	0.132	0.733	0.19	0.896	0.094	2.494	0.188	2.968	0	0	0	0	0	0	0	0
k__Bacteria|p__Firmicutes|c__Negativicutes|o__Veillonellales|f__Veillonellaceae|g__Megasphaera|s__Megasphaera_elsdenii	0.022	0.01	0.022	0.096	0.048	0.014	0.047	0.86	0	0	0	0	0	0	0	0	0.008	0.783
k__Bacteria|p__Firmicutes|c__Negativicutes|o__Veillonellales|f__Veillonellaceae|g__Allisonella|s__Allisonella_histaminiformans	0.022	0.01	0.044	0.015	0.024	0.013	0.125	0.047	0.375	0.046	0.211	0.065	0	0	0	0	0	0
k__Bacteria|p__Firmicutes|c__Clostridia|o__Clostridiales|f__Ruminococcaceae|g__Flavonifractor|s__Flavonifractor_sp_An100	0.022	0.015	0.022	0.008	0.024	0.018	0.047	0.013	0.062	0.004	0	0	0	0	0	0	0.397	0.168
k__Bacteria|p__Actinobacteria|c__Coriobacteriia|o__Coriobacteriales|f__Atopobiaceae|g__Olsenella|s__Olsenella_profusa	0	0	0	0	0	0	0.047	0.002	0.062	0.019	0.053	0.004	0.267	0.434	0.014	0.005	0.14	0.025
k__Bacteria|p__Bacteroidetes|c__Bacteroidia|o__Bacteroidales|f__Prevotellaceae|g__Prevotella|s__Prevotella_sp_CAG_520	0.007	0.003	0.022	0.005	0	0	0.047	5.679	0.125	4.116	0.895	3.96	0	0	0	0	0	0
k__Bacteria|p__Firmicutes|c__Firmicutes_unclassified|o__Firmicutes_unclassified|f__Firmicutes_unclassified|g__Firmicutes_unclassified|s__Firmicutes_bacterium_CAG_791	0	0	0	0	0	0	0.016	3.375	0	0	0.632	1.655	0	0	0	0	0	0
k__Bacteria|p__Firmicutes|c__Negativicutes|o__Selenomonadales|f__Selenomonadaceae|g__Mitsuokella|s__Mitsuokella_multacida	0.007	0.052	0	0	0	0	0.078	0.821	0.125	0.145	0	0	0	0	0	0	0.008	0.115
k__Archaea|p__Euryarchaeota|c__Thermoplasmata|o__Methanomassiliicoccales|f__Methanomassiliicoccaceae|g__Methanomassiliicoccus|s__Candidatus_Methanomassiliicoccus_intestinalis	0.051	0.371	0.011	0.078	0.024	0.181	0.016	0.659	0.062	0.005	0	0	0	0	0	0	0	0
k__Bacteria|p__Bacteroidetes|c__Bacteroidia|o__Bacteroidales|f__Prevotellaceae|g__Prevotella|s__Prevotella_stercorea	0.007	13.623	0.033	18.283	0	0	0.047	0.426	0.125	0.482	0.947	2.836	0	0	0	0	0	0
k__Bacteria|p__Proteobacteria|c__Gammaproteobacteria|o__Aeromonadales|f__Succinivibrionaceae|g__Succinatimonas|s__Succinatimonas_hippei	0	0	0	0	0	0	0.047	0.156	0	0	0	0	0	0	0	0	0.579	0.769
k__Bacteria|p__Firmicutes|c__Clostridia|o__Clostridiales|f__Ruminococcaceae|g__Ruminococcaceae_unclassified|s__Ruminococcaceae_bacterium_D5	0.123	0.031	0.165	0.053	0.071	0.031	0.266	0.024	0.125	0.009	0	0	0	0	0	0	0	0
k__Bacteria|p__Bacteroidetes|c__Bacteroidia|o__Bacteroidales|f__Prevotellaceae|g__Prevotella|s__Prevotella_bivia	0.051	0.011	0.066	0.02	0.048	0.026	0.031	0.041	0.125	0.018	0	0	0	0	0	0	0	0
k__Bacteria|p__Bacteroidetes|c__Bacteroidia|o__Bacteroidales|f__Prevotellaceae|g__Prevotella|s__Prevotella_timonensis	0.036	0.171	0.044	0.027	0.071	0.038	0.016	0.032	0	0	0.053	0.012	0	0	0	0	0	0
k__Bacteria|p__Proteobacteria|c__Gammaproteobacteria|o__Enterobacterales|f__Enterobacteriaceae|g__Klebsiella|s__Klebsiella_aerogenes	0.014	0.047	0	0	0	0	0.016	0.015	0	0	0.053	0.008	0	0	0	0	0	0
k__Bacteria|p__Actinobacteria|c__Actinobacteria|o__Propionibacteriales|f__Propionibacteriaceae|g__Propionibacterium|s__Propionibacterium_freudenreichii	0	0	0	0	0	0	0.062	0.008	0	0	0	0	0	0	0	0	0.033	1.319
k__Bacteria|p__Firmicutes|c__Tissierellia|o__Tissierellia_unclassified|f__Tissierellia_unclassified|g__Tissierellia_unclassified|s__Bacteroides_coagulans	0	0	0	0	0	0	0.016	0.002	0	0	0	0	0	0	0	0	0	0
k__Bacteria|p__Bacteroidetes|c__Bacteroidia|o__Bacteroidales|f__Bacteroidaceae|g__Bacteroides|s__Bacteroides_sp_CAG_661	0	0	0	0	0	0	0.031	14.1	0.062	0.001	0	0	0	0	0	0	0.554	0.508
k__Bacteria|p__Bacteroidetes|c__Bacteroidia|o__Bacteroidales|f__Bacteroidaceae|g__Bacteroides|s__Bacteroides_coprophilus	0.014	2.328	0.022	0.589	0.024	1.149	0.109	0.862	0.062	0.193	0	0	0	0	0	0	0.397	1.063
k__Bacteria|p__Proteobacteria|c__Deltaproteobacteria|o__Desulfovibrionales|f__Desulfovibrionaceae|g__Desulfovibrio|s__Desulfovibrio_sp_An276	0	0	0	0	0	0	0.016	0.726	0	0	0	0	0	0	0	0	0.421	1.201
k__Bacteria|p__Bacteroidetes|c__Bacteroidia|o__Bacteroidales|f__Prevotellaceae|g__Prevotella|s__Prevotella_sp_CAG_1124	0	0	0	0	0	0	0.031	0.764	0	0	0	0	0	0	0	0	0.264	0.679
k__Bacteria|p__Bacteroidetes|c__Bacteroidia|o__Bacteroidales|f__Prevotellaceae|g__Prevotella|s__Prevotella_sp_CAG_1185	0.014	0.006	0.011	0.242	0	0	0.062	0.089	0.125	0.136	0	0	0	0	0	0	0.132	0.163
k__Bacteria|p__Bacteroidetes|c__Bacteroidia|o__Bacteroidales|f__Bacteroidaceae|g__Bacteroides|s__Bacteroides_sp_CAG_443	0.014	20.207	0.011	0.105	0.048	0.002	0.109	4.21	0.062	0.04	0	0	0	0	0	0	0.025	0.044
k__Bacteria|p__Firmicutes|c__Bacilli|o__Lactobacillales|f__Leuconostocaceae|g__Weissella|s__Weissella_confusa	0	0	0	0	0	0	0.016	4.81	0	0	0.632	0.315	0	0	0.007	1.871	0.083	0.113
k__Bacteria|p__Firmicutes|c__Bacilli|o__Lactobacillales|f__Streptococcaceae|g__Streptococcus|s__Streptococcus_anginosus_group	0	0	0.011	0.001	0	0	0.031	0.264	0.125	0.077	0.263	0.02	0	0	0	0	0	0
k__Bacteria|p__Firmicutes|c__Bacilli|o__Lactobacillales|f__Lactobacillaceae|g__Lactobacillus|s__Lactobacillus_salivarius	0	0	0	0	0	0	0.016	0.365	0.062	0.246	0	0	0	0	0	0	0.835	2.499
k__Bacteria|p__Firmicutes|c__Bacilli|o__Lactobacillales|f__Lactobacillaceae|g__Pediococcus|s__Pediococcus_pentosaceus	0	0	0	0	0	0	0.016	0.332	0	0	0	0	0	0	0	0	0.058	2.427
k__Bacteria|p__Firmicutes|c__Bacilli|o__Lactobacillales|f__Lactobacillaceae|g__Lactobacillus|s__Lactobacillus_reuteri	0	0	0	0	0	0	0.031	1.669	0	0	0	0	0	0	0.525	4.75	0.711	1.68
k__Bacteria|p__Bacteroidetes|c__Bacteroidia|o__Bacteroidales|f__Bacteroidaceae|g__Bacteroides|s__Bacteroides_nordii	0.21	0.076	0.176	0.043	0.19	0.121	0.188	0.043	0.062	0.231	0.053	0.126	0	0	0.113	0.37	0	0
k__Bacteria|p__Firmicutes|c__Bacilli|o__Lactobacillales|f__Lactobacillaceae|g__Lactobacillus|s__Lactobacillus_fermentum	0	0	0	0	0	0	0.031	0.558	0.062	0.264	0.632	0.084	0	0	0	0	0.05	0.084
k__Bacteria|p__Firmicutes|c__Bacilli|o__Lactobacillales|f__Streptococcaceae|g__Streptococcus|s__Streptococcus_infantis	0.029	0.007	0.011	0.002	0.024	0.008	0.047	0.013	0.188	0.045	0.053	0.011	0	0	0	0	0	0
k__Bacteria|p__Firmicutes|c__Bacilli|o__Lactobacillales|f__Streptococcaceae|g__Streptococcus|s__Streptococcus_oralis	0.022	0.007	0.022	0.008	0	0	0.047	0.026	0.125	0.098	0.105	0.016	0	0	0	0	0	0
k__Bacteria|p__Firmicutes|c__Bacilli|o__Lactobacillales|f__Streptococcaceae|g__Streptococcus|s__Streptococcus_sp_F0442	0.007	0.003	0	0	0	0	0.016	0.019	0.062	0.002	0	0	0	0	0	0	0	0
k__Bacteria|p__Firmicutes|c__Clostridia|o__Clostridiales|f__Lachnospiraceae|g__Lachnoclostridium|s__Clostridium_symbiosum	0.109	0.057	0.154	0.037	0.143	0.016	0.172	0.064	0.375	0.53	0.053	1.761	0	0	0	0	0	0
k__Bacteria|p__Firmicutes|c__Bacilli|o__Lactobacillales|f__Leuconostocaceae|g__Weissella|s__Weissella_cibaria	0	0	0	0	0	0	0.031	0.059	0	0	0.211	0.105	0	0	0.007	0.026	0.083	0.232
k__Bacteria|p__Actinobacteria|c__Actinobacteria|o__Actinomycetales|f__Actinomycetaceae|g__Actinomyces|s__Actinomyces_sp_HPA0247	0	0	0	0	0	0	0.016	0.015	0	0	0	0	0	0	0	0	0	0
k__Bacteria|p__Actinobacteria|c__Actinobacteria|o__Actinomycetales|f__Actinomycetaceae|g__Actinomyces|s__Actinomyces_sp_S6_Spd3	0	0	0	0	0	0	0.016	0.011	0	0	0	0	0	0	0	0	0	0
k__Bacteria|p__Bacteroidetes|c__Bacteroidia|o__Bacteroidales|f__Prevotellaceae|g__Prevotella|s__Prevotella_buccae	0	0	0	0	0	0	0.031	0.015	0	0	0.053	2.305	0	0	0	0	0	0
k__Bacteria|p__Actinobacteria|c__Actinobacteria|o__Bifidobacteriales|f__Bifidobacteriaceae|g__Bifidobacterium|s__Bifidobacterium_dentium	0	0	0	0	0	0	0.078	0.01	0	0	0.105	0.065	0.067	1.658	0	0	0	0
k__Bacteria|p__Proteobacteria|c__Betaproteobacteria|o__Burkholderiales|f__Burkholderiaceae|g__Lautropia|s__Lautropia_mirabilis	0	0	0.011	0.003	0	0	0.016	0.001	0	0	0	0	0	0	0	0	0	0
k__Bacteria|p__Actinobacteria|c__Actinobacteria|o__Bifidobacteriales|f__Bifidobacteriaceae|g__Bifidobacterium|s__Bifidobacterium_breve	0.014	0.043	0.011	1.16	0	0	0.016	0.133	0.125	0.034	0	0	0	0	0	0	0	0
k__Bacteria|p__Bacteroidetes|c__Bacteroidia|o__Bacteroidales|f__Prevotellaceae|g__Prevotella|s__Prevotella_oris	0	0	0	0	0	0	0.016	0.02	0	0	0	0	0	0	0	0	0	0
k__Bacteria|p__Firmicutes|c__Erysipelotrichia|o__Erysipelotrichales|f__Erysipelotrichaceae|g__Dielma|s__Dielma_fastidiosa	0.181	0.029	0.132	0.025	0.19	0.03	0.156	0.026	0.375	0.02	0	0	0	0	0	0	0	0
k__Bacteria|p__Firmicutes|c__Erysipelotrichia|o__Erysipelotrichales|f__Erysipelotrichaceae|g__Erysipelatoclostridium|s__Erysipelatoclostridium_ramosum	0.109	0.051	0.055	0.032	0.071	0.034	0.062	0.043	0.188	0.57	0.105	0.682	0	0	0	0	0	0
k__Bacteria|p__Firmicutes|c__Bacilli|o__Lactobacillales|f__Streptococcaceae|g__Streptococcus|s__Streptococcus_mutans	0	0	0	0	0	0	0.047	0.026	0.062	0.002	0	0	0	0	0	0	0	0
k__Bacteria|p__Firmicutes|c__Clostridia|o__Clostridiales|f__Lachnospiraceae|g__Blautia|s__Blautia_producta	0.014	0.007	0.022	0.025	0	0	0.031	0.028	0.062	0.023	0	0	0	0	0	0	0	0
k__Bacteria|p__Synergistetes|c__Synergistia|o__Synergistales|f__Synergistaceae|g__Pyramidobacter|s__Pyramidobacter_piscolens	0.007	0.004	0.011	0.029	0.048	0.041	0.031	0.004	0.062	0.004	0	0	0	0	0	0	0	0
k__Bacteria|p__Bacteroidetes|c__Bacteroidia|o__Bacteroidales|f__Rikenellaceae|g__Alistipes|s__Alistipes_sp_An31A	0	0	0	0	0	0	0.047	0.393	0.062	0.918	0	0	0	0	0	0	0.455	1.599
k__Bacteria|p__Proteobacteria|c__Gammaproteobacteria|o__Aeromonadales|f__Succinivibrionaceae|g__Anaerobiospirillum|s__Anaerobiospirillum_thomasii	0.007	0.005	0	0	0	0	0.031	0.067	0.062	0.009	0.421	0.069	0	0	0	0	0.099	0.051
k__Bacteria|p__Firmicutes|c__Negativicutes|o__Selenomonadales|f__Selenomonadaceae|g__Megamonas|s__Megamonas_funiformis	0.043	1.017	0.033	0.02	0.048	0.32	0.047	0.088	0	0	0	0	0	0	0	0	0.562	0.333
k__Bacteria|p__Firmicutes|c__Negativicutes|o__Selenomonadales|f__Selenomonadaceae|g__Megamonas|s__Megamonas_funiformis_CAG_377	0.014	0.009	0	0	0	0	0.031	0.009	0	0	0	0	0	0	0	0	0.19	0.53
k__Bacteria|p__Proteobacteria|c__Gammaproteobacteria|o__Enterobacterales|f__Enterobacteriaceae|g__Klebsiella|s__Klebsiella_pneumoniae	0.029	0.15	0.044	0.216	0.048	0.064	0.047	0.233	0	0	0.474	0.249	0	0	0.007	0.106	0.008	0.035
k__Bacteria|p__Firmicutes|c__Clostridia|o__Clostridiales|f__Clostridiaceae|g__Clostridium|s__Clostridium_paraputrificum	0.007	0.08	0	0	0	0	0.016	0.025	0	0	0.105	0.038	0	0	0	0	0.017	0.113
k__Bacteria|p__Proteobacteria|c__Gammaproteobacteria|o__Enterobacterales|f__Enterobacteriaceae|g__Franconibacter|s__Franconibacter_helveticus	0	0	0	0	0	0	0.031	0.001	0	0	0	0	0	0	0	0	0	0
k__Bacteria|p__Firmicutes|c__Clostridia|o__Clostridiales|f__Ruminococcaceae|g__Ruminococcus|s__Ruminococcus_sp_CAG_563	0.014	0.009	0	0	0	0	0.078	2.537	0.125	0.014	0.421	0.734	0.2	0.411	0	0	0	0
k__Bacteria|p__Firmicutes|c__Clostridia|o__Clostridiales|f__Clostridiaceae|g__Clostridium|s__Clostridium_sp_CAG_632	0	0	0	0	0	0	0.031	8.284	0.062	0.174	0.579	0.839	0.2	4.805	0	0	0	0
k__Bacteria|p__Bacteroidetes|c__Bacteroidia|o__Bacteroidales|f__Prevotellaceae|g__Prevotella|s__Prevotella_sp_AM42_24	0.036	4.15	0.033	1.063	0	0	0.031	0.661	0	0	0.842	2.469	0	0	0	0	0	0
k__Bacteria|p__Bacteroidetes|c__Bacteroidia|o__Bacteroidales|f__Prevotellaceae|g__Prevotella|s__Prevotella_sp_885	0.022	2.348	0.033	0.526	0	0	0.016	0.515	0.062	1.404	0.789	1.143	0	0	0	0	0	0
k__Bacteria|p__Firmicutes|c__Clostridia|o__Clostridiales|f__Clostridiaceae|g__Clostridium|s__Clostridium_sp_CAG_590	0.007	0.034	0	0	0	0	0.062	1.519	0.062	0.139	0.579	0.421	0	0	0	0	0	0
k__Bacteria|p__Firmicutes|c__Negativicutes|o__Selenomonadales|f__Selenomonadaceae|g__Mitsuokella|s__Mitsuokella_jalaludinii	0	0	0	0	0	0	0.094	0.351	0.125	0.814	0	0	0	0	0	0	0	0
k__Bacteria|p__Firmicutes|c__Clostridia|o__Clostridiales|f__Ruminococcaceae|g__Ruminococcus|s__Ruminococcus_sp_CAG_488	0.029	0.08	0.011	0	0	0	0.094	0.615	0.125	1.143	0.526	0.41	0.133	10.743	0	0	0	0
k__Bacteria|p__Firmicutes|c__Clostridia|o__Clostridiales|f__Peptostreptococcaceae|g__Romboutsia|s__Romboutsia_ilealis	0.014	0.059	0	0	0	0	0.016	0.002	0.062	0.003	0.211	0.025	0	0	0.078	0.109	0.289	0.505
k__Bacteria|p__Firmicutes|c__Clostridia|o__Clostridiales|f__Ruminococcaceae|g__Pseudoflavonifractor|s__Pseudoflavonifractor_capillosus	0	0	0.011	0.002	0	0	0.078	0.01	0.062	0.013	0	0	0	0	0	0	0.628	0.242
k__Bacteria|p__Firmicutes|c__Clostridia|o__Clostridiales|f__Ruminococcaceae|g__Ruminococcus|s__Ruminococcus_sp_CAG_624	0.022	0.108	0	0	0	0	0.031	0.231	0	0	0.211	1.711	0.333	11.001	0	0	0	0
k__Bacteria|p__Bacteroidetes|c__Bacteroidia|o__Bacteroidales|f__Tannerellaceae|g__Parabacteroides|s__Parabacteroides_sp_CAG_409	0	0	0.011	0.212	0	0	0.031	1.112	0.125	0.491	0	0	0	0	0	0	0.661	1.518
k__Bacteria|p__Proteobacteria|c__Betaproteobacteria|o__Burkholderiales|f__Oxalobacteraceae|g__Oxalobacter|s__Oxalobacter_formigenes	0.065	0.1	0.077	0.06	0.095	0.09	0.062	0.112	0	0	0	0	0	0	0	0	0	0
k__Bacteria|p__Actinobacteria|c__Actinobacteria|o__Bifidobacteriales|f__Bifidobacteriaceae|g__Bifidobacterium|s__Bifidobacterium_angulatum	0.029	0.013	0.033	0.051	0.048	0.075	0.078	0.046	0	0	0	0	0	0	0	0	0	0
k__Bacteria|p__Bacteroidetes|c__Bacteroidia|o__Bacteroidales|f__Porphyromonadaceae|g__Sanguibacteroides|s__Sanguibacteroides_justesenii	0.036	0.071	0.022	0.015	0	0	0.172	0.083	0.062	0.061	0	0	0	0	0	0	0	0
k__Bacteria|p__Proteobacteria|c__Gammaproteobacteria|o__Enterobacterales|f__Enterobacteriaceae|g__Klebsiella|s__Klebsiella_oxytoca	0	0	0.011	0.007	0	0	0.016	0.018	0	0	0.053	0.011	0	0	0	0	0	0
k__Bacteria|p__Proteobacteria|c__Gammaproteobacteria|o__Enterobacterales|f__Enterobacteriaceae|g__Enterobacter|s__Enterobacter_cloacae_complex	0.007	0.002	0.022	0.697	0	0	0.047	0.023	0.062	1.875	0.158	0.233	0	0	0	0	0.008	0.046
k__Bacteria|p__Proteobacteria|c__Gammaproteobacteria|o__Enterobacterales|f__Enterobacteriaceae|g__Kosakonia|s__Kosakonia_cowanii	0	0	0.011	0.001	0	0	0.016	0.013	0	0	0	0	0	0	0	0	0	0
k__Bacteria|p__Proteobacteria|c__Gammaproteobacteria|o__Enterobacterales|f__Enterobacteriaceae|g__Raoultella|s__Raoultella_ornithinolytica	0	0	0	0	0	0	0.016	0.011	0	0	0	0	0	0	0	0	0	0
k__Bacteria|p__Proteobacteria|c__Gammaproteobacteria|o__Enterobacterales|f__Enterobacteriaceae|g__Klebsiella|s__Klebsiella_michiganensis	0	0	0	0	0	0	0.016	0.01	0	0	0.053	0.008	0	0	0.021	0.161	0	0
k__Bacteria|p__Proteobacteria|c__Gammaproteobacteria|o__Enterobacterales|f__Enterobacteriaceae|g__Kluyvera|s__Kluyvera_cryocrescens	0	0	0	0	0	0	0.031	0.017	0	0	0	0	0	0	0	0	0	0
k__Bacteria|p__Firmicutes|c__Clostridia|o__Clostridiales|f__Ruminococcaceae|g__Anaerotruncus|s__Anaerotruncus_sp_CAG_528	0.014	18.913	0.011	0.73	0.024	1.383	0.062	5.894	0.062	0.477	0.368	0.646	0	0	0	0	0	0
k__Bacteria|p__Firmicutes|c__Clostridia|o__Clostridiales|f__Clostridiaceae|g__Clostridium|s__Clostridium_sp_CAG_964	0.007	0.392	0.022	0.228	0.024	0.001	0.031	1.018	0	0	0.158	0.101	0	0	0	0	0	0
k__Bacteria|p__Bacteroidetes|c__Bacteroidia|o__Bacteroidales|f__Bacteroidaceae|g__Bacteroides|s__Bacteroides_sp_CAG_462	0	0	0	0	0	0	0.031	1.293	0.125	0.516	0	0	0	0	0	0	0.273	1.345
k__Bacteria|p__Bacteroidetes|c__Bacteroidia|o__Bacteroidales|f__Prevotellaceae|g__Prevotella|s__Prevotella_sp_CAG_755	0	0	0	0	0	0	0.016	0.294	0	0	0	0	0	0	0	0	0.496	2.715
k__Bacteria|p__Firmicutes|c__Clostridia|o__Clostridiales|f__Ruminococcaceae|g__Ruminococcus|s__Ruminococcus_sp_CAG_579	0	0	0	0	0	0	0.016	0.438	0.062	3.42	0.526	0.154	0	0	0	0	0	0
k__Bacteria|p__Firmicutes|c__Clostridia|o__Clostridiales|f__Ruminococcaceae|g__Ruminococcus|s__Ruminococcus_sp_CAG_403	0.007	0.088	0.022	0.152	0.024	0.028	0.109	0.427	0.062	2.334	0.737	0.264	0	0	0	0	0	0
k__Bacteria|p__Bacteroidetes|c__Bacteroidia|o__Bacteroidales|f__Bacteroidaceae|g__Bacteroides|s__Bacteroides_sp_CAG_530	0	0	0	0	0	0	0.047	1.712	0.125	3.998	0.737	0.348	0	0	0	0	0	0
k__Bacteria|p__Bacteroidetes|c__Bacteroidia|o__Bacteroidales|f__Bacteroidaceae|g__Bacteroides|s__Bacteroides_sp_CAG_633	0	0	0	0	0	0	0.031	0.587	0	0	0	0	0	0	0	0	0.636	1.421
k__Bacteria|p__Proteobacteria|c__Gammaproteobacteria|o__Enterobacterales|f__Enterobacteriaceae|g__Klebsiella|s__Klebsiella_variicola	0.029	0.118	0.033	0.043	0.048	0.028	0.031	0.086	0	0	0.263	0.123	0	0	0	0	0	0
k__Bacteria|p__Proteobacteria|c__Gammaproteobacteria|o__Enterobacterales|f__Enterobacteriaceae|g__Klebsiella|s__Klebsiella_quasipneumoniae	0.014	0.027	0.033	0.025	0	0	0.031	0.034	0	0	0.211	0.161	0	0	0	0	0.008	0.028
k__Bacteria|p__Bacteroidetes|c__Bacteroidia|o__Bacteroidales|f__Prevotellaceae|g__Prevotella|s__Prevotella_sp_CAG_485	0	0	0	0	0	0	0.031	2.57	0.125	1.058	0	0	0	0	0	0	0	0
k__Bacteria|p__Proteobacteria|c__Gammaproteobacteria|o__Enterobacterales|f__Enterobacteriaceae|g__Citrobacter|s__Citrobacter_freundii	0	0	0	0	0	0	0.031	0.006	0	0	0.474	0.09	0	0	0.007	0.074	0	0
k__Bacteria|p__Actinobacteria|c__Coriobacteriia|o__Coriobacteriales|f__Atopobiaceae|g__Atopobium|s__Atopobium_deltae	0	0	0.011	0.01	0	0	0.016	0.005	0	0	0.211	0.081	0	0	0	0	0.132	0.05
k__Bacteria|p__Firmicutes|c__Clostridia|o__Clostridiales|f__Ruminococcaceae|g__Harryflintia|s__Harryflintia_acetispora	0.007	0.014	0.033	0.004	0.048	0.001	0.094	0.009	0	0	0	0	0	0	0	0	0.008	0.016
k__Bacteria|p__Proteobacteria|c__Deltaproteobacteria|o__Desulfovibrionales|f__Desulfovibrionaceae|g__Desulfovibrio|s__Desulfovibrio_fairfieldensis	0.022	0.053	0	0	0	0	0.016	0.047	0.062	0.18	0	0	0	0	0	0	0	0
k__Bacteria|p__Firmicutes|c__Bacilli|o__Lactobacillales|f__Leuconostocaceae|g__Leuconostoc|s__Leuconostoc_mesenteroides	0.007	0.013	0	0	0	0	0.016	0.02	0	0	0.053	0.493	0	0	0	0	0.008	0.07
k__Bacteria|p__Firmicutes|c__Bacilli|o__Bacillales|f__Bacillales_unclassified|g__Gemella|s__Gemella_haemolysans	0.007	0.03	0.011	0.013	0	0	0.031	0.012	0	0	0	0	0	0	0	0	0	0
k__Bacteria|p__Firmicutes|c__Bacilli|o__Bacillales|f__Bacillaceae|g__Hydrogenibacillus|s__Hydrogenibacillus_schlegelii	0	0	0	0	0	0	0.016	0.006	0.062	0.003	0	0	0	0	0	0	0	0
k__Bacteria|p__Firmicutes|c__Bacilli|o__Lactobacillales|f__Streptococcaceae|g__Lactococcus|s__Lactococcus_raffinolactis	0	0	0	0	0	0	0.016	0.005	0	0	0.526	0.604	0	0	0.035	0.091	0.107	1.002
k__Bacteria|p__Firmicutes|c__Firmicutes_unclassified|o__Firmicutes_unclassified|f__Firmicutes_unclassified|g__Firmicutes_unclassified|s__Firmicutes_bacterium_CAG_534	0	0	0	0	0	0	0.031	1.386	0	0	0.105	0.03	0	0	0	0	0	0
k__Bacteria|p__Firmicutes|c__Negativicutes|o__Selenomonadales|f__Selenomonadaceae|g__Megamonas|s__Megamonas_hypermegale	0.029	1.27	0.011	0.012	0.048	0.162	0.016	0.102	0	0	0	0	0	0	0	0	0.669	1.344
k__Bacteria|p__Actinobacteria|c__Actinobacteria|o__Micrococcales|f__Micrococcales_unclassified|g__Tropheryma|s__Tropheryma_whipplei	0	0	0	0	0	0	0.031	0.006	0	0	0	0	0	0	0	0	0	0
k__Bacteria|p__Spirochaetes|c__Spirochaetia|o__Brachyspirales|f__Brachyspiraceae|g__Brachyspira|s__Brachyspira_sp_CAG_700	0.014	0.647	0	0	0	0	0.016	2.365	0	0	0.474	1.594	0	0	0	0	0	0
k__Bacteria|p__Bacteroidetes|c__Bacteroidia|o__Bacteroidales|f__Prevotellaceae|g__Prevotella|s__Prevotella_sp_CAG_5226	0.014	3.263	0.022	4.987	0	0	0.016	0.448	0.062	5.593	0.684	0.872	0	0	0	0	0	0
k__Bacteria|p__Bacteroidetes|c__Bacteroidia|o__Bacteroidales|f__Bacteroidaceae|g__Bacteroides|s__Bacteroides_sp_CAG_598	0	0	0	0	0	0	0.016	0.005	0.062	0.203	0	0	0	0	0	0	0.793	2.835
k__Bacteria|p__Bacteroidetes|c__Bacteroidia|o__Bacteroidales|f__Prevotellaceae|g__Prevotella|s__Prevotella_sp_CAG_1320	0	0	0	0	0	0	0.016	29.219	0	0	0	0	0	0	0	0	0.537	3.51
k__Bacteria|p__Bacteroidetes|c__Bacteroidia|o__Bacteroidales|f__Prevotellaceae|g__Prevotella|s__Prevotella_sp_CAG_891	0	0	0.011	15.353	0	0	0.016	8.878	0	0	0	0	0	0	0	0	0	0
k__Bacteria|p__Firmicutes|c__Clostridia|o__Clostridiales|f__Lachnospiraceae|g__Sellimonas|s__Sellimonas_intestinalis	0.058	0.026	0.121	0.069	0.024	0.015	0.047	0.032	0.125	0.024	0	0	0	0	0	0	0.017	0.136
k__Bacteria|p__Firmicutes|c__Clostridia|o__Clostridiales|f__Clostridiales_Family_XIII_Incertae_Sedis|g__Clostridiales_Family_XIII_Incertae_Sedis_unclassified|s__Eubacterium_sulci	0.065	0.024	0.044	0.004	0	0	0.016	0.001	0	0	0.263	0.035	0	0	0	0	0	0
k__Bacteria|p__Actinobacteria|c__Actinobacteria|o__Bifidobacteriales|f__Bifidobacteriaceae|g__Bifidobacterium|s__Bifidobacterium_animalis	0.007	0.038	0.022	0.023	0	0	0.047	0.186	0.25	0.166	0	0	0	0	0	0	0	0
k__Bacteria|p__Bacteroidetes|c__Bacteroidia|o__Bacteroidales|f__Prevotellaceae|g__Prevotella|s__Prevotella_sp_CAG_617	0.014	3.992	0	0	0	0	0.031	7.156	0	0	0	0	0	0	0	0	0.207	0.986
k__Bacteria|p__Bacteroidetes|c__Bacteroidia|o__Bacteroidales|f__Prevotellaceae|g__Prevotella|s__Prevotella_sp_CAG_1058	0	0	0	0	0	0	0.016	3.297	0	0	0	0	0	0	0	0	0.694	1.443
k__Bacteria|p__Bacteroidetes|c__Bacteroidia|o__Bacteroidales|f__Bacteroidaceae|g__Bacteroides|s__Bacteroides_sp_43_108	0	0	0	0	0	0	0.016	0.26	0	0	0	0	0	0	0	0	0.479	0.656
k__Bacteria|p__Bacteroidetes|c__Bacteroidia|o__Bacteroidales|f__Prevotellaceae|g__Prevotella|s__Prevotella_buccalis	0.036	0.017	0.055	0.056	0.071	0.005	0.016	0.171	0	0	0.053	0.014	0	0	0	0	0	0
k__Bacteria|p__Proteobacteria|c__Epsilonproteobacteria|o__Campylobacterales|f__Campylobacteraceae|g__Campylobacter|s__Campylobacter_hominis	0.051	0.056	0.055	0.025	0.024	0.013	0.016	0.056	0	0	0	0	0	0	0	0	0	0
k__Bacteria|p__Proteobacteria|c__Betaproteobacteria|o__Burkholderiales|f__Comamonadaceae|g__Comamonas|s__Comamonas_kerstersii	0.007	0.007	0.011	0.027	0.024	0.039	0.016	0.015	0	0	0	0	0	0	0	0	0.008	0.65
k__Bacteria|p__Firmicutes|c__Clostridia|o__Clostridiales|f__Ruminococcaceae|g__Flavonifractor|s__Flavonifractor_sp_An306	0	0	0	0	0	0	0.016	0.002	0	0	0	0	0	0	0	0	0.595	0.235
k__Bacteria|p__Firmicutes|c__Clostridia|o__Clostridiales|f__Ruminococcaceae|g__Anaerofilum|s__Anaerofilum_sp_An201	0	0	0	0	0	0	0.016	0.001	0	0	0	0	0	0	0	0	0.446	0.349
k__Bacteria|p__Firmicutes|c__Clostridia|o__Clostridiales|f__Clostridiales_unclassified|g__Clostridiales_unclassified|s__Clostridiales_bacterium_1_7_47FAA	0.022	0.005	0	0	0.048	0.019	0.062	0.067	0.125	0.003	0	0	0	0	0	0	0	0
k__Bacteria|p__Proteobacteria|c__Gammaproteobacteria|o__Enterobacterales|f__Enterobacteriaceae|g__Enterobacter|s__Enterobacter_mori	0	0	0	0	0	0	0.016	0.004	0	0	0	0	0	0	0	0	0.008	0.442
k__Bacteria|p__Firmicutes|c__Limnochordia|o__Limnochordales|f__Limnochordaceae|g__Limnochorda|s__Limnochorda_pilosa	0	0	0	0	0	0	0.031	0.002	0.062	0.006	0	0	0	0	0.035	0.016	0	0
k__Bacteria|p__Bacteroidetes|c__Bacteroidia|o__Bacteroidales|f__Rikenellaceae|g__Alistipes|s__Alistipes_sp_An66	0	0	0	0	0	0	0.016	0.452	0	0	0	0	0	0	0	0	0.579	0.654
k__Bacteria|p__Bacteroidetes|c__Bacteroidia|o__Bacteroidales|f__Rikenellaceae|g__Rikenella|s__Rikenella_microfusus	0	0	0	0	0	0	0.016	2.455	0	0	0	0	0	0	0	0	0.008	0.443
k__Bacteria|p__Firmicutes|c__Clostridia|o__Clostridiales|f__Ruminococcaceae|g__Ruminococcaceae_unclassified|s__Clostridium_methylpentosum	0.007	0.01	0.033	0.005	0	0	0.016	0.004	0	0	0	0	0	0	0	0	0	0
k__Bacteria|p__Firmicutes|c__Clostridia|o__Clostridiales|f__Clostridiaceae|g__Lactonifactor|s__Lactonifactor_longoviformis	0	0	0	0	0	0	0.031	0.003	0.062	0.046	0	0	0	0	0	0	0	0
k__Bacteria|p__Actinobacteria|c__Actinobacteria|o__Actinomycetales|f__Actinomycetaceae|g__Actinomyces|s__Actinomyces_graevenitzii	0	0	0.033	0.037	0	0	0.016	0.003	0	0	0.053	0.022	0	0	0	0	0	0
k__Bacteria|p__Firmicutes|c__Bacilli|o__Lactobacillales|f__Lactobacillaceae|g__Lactobacillus|s__Lactobacillus_delbrueckii	0	0	0	0	0	0	0.016	0.055	0	0	0.053	0.004	0	0	0.021	0.067	0.116	0.419
k__Bacteria|p__Firmicutes|c__Bacilli|o__Lactobacillales|f__Lactobacillaceae|g__Lactobacillus|s__Lactobacillus_amylovorus	0	0	0	0	0	0	0.016	7.823	0.062	0.49	0	0	0	0	0	0	0.372	0.421
k__Bacteria|p__Fusobacteria|c__Fusobacteriia|o__Fusobacteriales|f__Fusobacteriaceae|g__Fusobacterium|s__Fusobacterium_mortiferum	0.014	0.398	0.033	0.171	0	0	0.016	3.447	0	0	0	0	0	0	0	0	0.289	1.776
k__Bacteria|p__Firmicutes|c__Bacilli|o__Lactobacillales|f__Lactobacillaceae|g__Lactobacillus|s__Lactobacillus_johnsonii	0	0	0	0	0	0	0.016	3.133	0	0	0	0	0	0	0.766	13.001	0.917	12.073
k__Bacteria|p__Firmicutes|c__Clostridia|o__Clostridiales|f__Lachnospiraceae|g__Blautia|s__Blautia_hansenii	0.051	0.071	0.033	0.052	0	0	0.016	0.227	0.188	0.365	0	0	0	0	0	0	0	0
k__Bacteria|p__Firmicutes|c__Bacilli|o__Lactobacillales|f__Lactobacillaceae|g__Lactobacillus|s__Lactobacillus_animalis	0	0	0	0	0	0	0.016	0.007	0	0	0	0	0	0	0	0	0.107	6.288
k__Bacteria|p__Firmicutes|c__Clostridia|o__Clostridiales|f__Lachnospiraceae|g__Lachnoclostridium|s__Clostridium_scindens	0	0	0.022	0.009	0	0	0.016	0.006	0	0	0	0	0	0	0	0	0	0
k__Bacteria|p__Firmicutes|c__Bacilli|o__Lactobacillales|f__Carnobacteriaceae|g__Agitococcus|s__Agitococcus_lubricus	0	0	0	0	0	0	0.016	0.002	0	0	0	0	0	0	0	0	0	0
k__Bacteria|p__Actinobacteria|c__Actinobacteria|o__Actinomycetales|f__Actinomycetaceae|g__Actinomyces|s__Actinomyces_oris	0	0	0.033	0.022	0	0	0.016	0.001	0	0	0	0	0	0	0	0	0	0
k__Bacteria|p__Firmicutes|c__Bacilli|o__Lactobacillales|f__Leuconostocaceae|g__Leuconostoc|s__Leuconostoc_lactis	0	0	0	0	0	0	0.016	0.001	0	0	0	0	0	0	0	0	0.017	0.01
k__Bacteria|p__Firmicutes|c__Clostridia|o__Clostridiales|f__Clostridiaceae|g__Clostridium|s__Clostridium_ventriculi	0	0	0	0	0	0	0	0	0	0	0.053	0.207	0.8	12.461	0	0	0	0
k__Bacteria|p__Proteobacteria|c__Gammaproteobacteria|o__Pseudomonadales|f__Moraxellaceae|g__Acinetobacter|s__Acinetobacter_junii	0	0	0	0	0	0	0	0	0	0	0.053	0.027	0.2	5.077	0	0	0	0
k__Bacteria|p__Firmicutes|c__Bacilli|o__Lactobacillales|f__Streptococcaceae|g__Streptococcus|s__Streptococcus_gallolyticus	0	0	0	0	0	0	0	0	0	0	0	0	0.133	0.138	0	0	0.025	0.12
k__Bacteria|p__Firmicutes|c__Bacilli|o__Lactobacillales|f__Streptococcaceae|g__Streptococcus|s__Streptococcus_pasteurianus	0	0	0.011	0.048	0	0	0	0	0	0	0	0	0.333	7.327	0	0	0	0
k__Bacteria|p__Actinobacteria|c__Actinobacteria|o__Bifidobacteriales|f__Bifidobacteriaceae|g__Bifidobacterium|s__Bifidobacterium_moukalabense	0	0	0	0	0	0	0	0	0	0	0	0	0.2	3.46	0	0	0	0
k__Bacteria|p__Actinobacteria|c__Actinobacteria|o__Propionibacteriales|f__Propionibacteriaceae|g__Cutibacterium|s__Cutibacterium_acnes	0.022	0.005	0.044	0.204	0.024	0.005	0	0	0	0	0.105	0.016	0.2	1.406	0	0	0.008	0.662
k__Bacteria|p__Firmicutes|c__Bacilli|o__Lactobacillales|f__Streptococcaceae|g__Lactococcus|s__Lactococcus_petauri	0	0	0	0	0	0	0	0	0	0	0.421	0.791	0.067	6.853	0	0	0	0
k__Bacteria|p__Firmicutes|c__Bacilli|o__Lactobacillales|f__Streptococcaceae|g__Lactococcus|s__Lactococcus_garvieae	0	0	0	0	0	0	0	0	0	0	0.316	0.27	0.067	1.529	0	0	0	0
k__Bacteria|p__Firmicutes|c__Bacilli|o__Bacillales|f__Staphylococcaceae|g__Staphylococcus|s__Staphylococcus_xylosus	0	0	0	0	0	0	0	0	0	0	0	0	0.067	19.922	0.035	2.065	0.008	0.005
k__Bacteria|p__Firmicutes|c__Clostridia|o__Clostridiales|f__Lachnospiraceae|g__Roseburia|s__Roseburia_sp_831b	0	0	0	0	0	0	0	0	0	0	0.105	0.157	0.2	2.133	0	0	0	0
k__Bacteria|p__Firmicutes|c__Clostridia|o__Clostridiales|f__Clostridiaceae|g__Clostridium|s__Clostridium_neonatale	0	0	0	0	0	0	0	0	0	0	0	0	0.067	2.185	0	0	0	0
k__Bacteria|p__Proteobacteria|c__Gammaproteobacteria|o__Pseudomonadales|f__Moraxellaceae|g__Acinetobacter|s__Acinetobacter_gerneri	0	0	0	0	0	0	0	0	0	0	0	0	0.067	0.027	0	0	0.025	1.236
k__Bacteria|p__Firmicutes|c__Clostridia|o__Clostridiales|f__Clostridiaceae|g__Clostridium|s__Clostridium_baratii	0	0	0	0	0	0	0	0	0	0	0	0	0.067	1.082	0	0	0	0
k__Bacteria|p__Firmicutes|c__Bacilli|o__Lactobacillales|f__Streptococcaceae|g__Streptococcus|s__Streptococcus_penaeicida	0	0	0	0	0	0	0	0	0	0	0	0	0.067	0.631	0	0	0	0
k__Bacteria|p__Bacteroidetes|c__Bacteroidia|o__Bacteroidales|f__Barnesiellaceae|g__Coprobacter|s__Coprobacter_sp	0.065	1.107	0.066	0.895	0.167	0.413	0	0	0	0	0	0	0	0	0	0	0	0
k__Bacteria|p__Firmicutes|c__Clostridia|o__Clostridiales|f__Lachnospiraceae|g__Lachnospiraceae_unclassified|s__Lachnospiraceae_bacterium_2_1_46FAA	0.007	0.095	0	0	0.048	0.231	0	0	0	0	0	0	0	0	0	0	0	0
k__Bacteria|p__Firmicutes|c__Firmicutes_unclassified|o__Firmicutes_unclassified|f__Firmicutes_unclassified|g__Firmicutes_unclassified|s__Firmicutes_bacterium_CAG_424	0.022	0.017	0.011	0.005	0.024	0.05	0	0	0.125	0.493	0	0	0	0	0	0	0	0
k__Bacteria|p__Fusobacteria|c__Fusobacteriia|o__Fusobacteriales|f__Fusobacteriaceae|g__Fusobacterium|s__Fusobacterium_ulcerans	0.029	0.09	0.022	0.016	0.071	0.101	0	0	0	0	0.053	0.023	0	0	0	0	0.008	0.01
k__Bacteria|p__Firmicutes|c__Erysipelotrichia|o__Erysipelotrichales|f__Erysipelotrichaceae|g__Candidatus_Stoquefichus|s__Candidatus_Stoquefichus_sp_KLE1796	0.072	0.038	0.088	0.031	0.024	0.002	0	0	0	0	0	0	0	0	0	0	0	0
k__Bacteria|p__Firmicutes|c__Clostridia|o__Clostridiales|f__Clostridiaceae|g__Clostridium|s__Clostridium_sp_D5	0.022	0.012	0.011	0.066	0.024	0.013	0	0	0	0	0	0	0	0	0	0	0	0
k__Bacteria|p__Firmicutes|c__Negativicutes|o__Veillonellales|f__Veillonellaceae|g__Megasphaera|s__Megasphaera_sp_DISK_18	0.007	0.021	0	0	0.071	0.016	0	0	0	0	0	0	0	0	0	0	0	0
k__Bacteria|p__Bacteroidetes|c__Bacteroidia|o__Bacteroidales|f__Porphyromonadaceae|g__Porphyromonas|s__Porphyromonas_asaccharolytica	0.036	0.065	0.088	0.029	0.095	0.008	0	0	0.062	0.138	0	0	0	0	0	0	0	0
k__Bacteria|p__Bacteroidetes|c__Bacteroidia|o__Bacteroidales|f__Prevotellaceae|g__Prevotella|s__Prevotella_corporis	0.043	0.016	0.044	0.044	0.071	0.036	0	0	0.062	0.008	0.053	0.068	0	0	0	0	0	0
k__Bacteria|p__Bacteroidetes|c__Bacteroidia|o__Bacteroidales|f__Bacteroidaceae|g__Bacteroides|s__Bacteroides_sp_OM05_12	0.014	0.413	0	0	0.024	0.554	0	0	0	0	0	0	0	0	0	0	0	0
k__Bacteria|p__Firmicutes|c__Negativicutes|o__Veillonellales|f__Veillonellaceae|g__Megasphaera|s__Megasphaera_sp_MJR8396C	0.007	0.219	0.011	0.142	0.048	0.326	0	0	0	0	0	0	0	0	0	0	0	0
k__Bacteria|p__Firmicutes|c__Bacilli|o__Lactobacillales|f__Streptococcaceae|g__Streptococcus|s__Streptococcus_sp_M334	0	0	0.011	0.002	0.024	0.006	0	0	0	0	0.053	0.011	0	0	0	0	0	0
k__Bacteria|p__Firmicutes|c__Bacilli|o__Lactobacillales|f__Enterococcaceae|g__Enterococcus|s__Enterococcus_faecium	0.029	0.066	0	0	0.024	0.026	0	0	0.062	0.005	0.105	0.178	0	0	0	0	0.182	0.636
k__Bacteria|p__Proteobacteria|c__Gammaproteobacteria|o__Enterobacterales|f__Enterobacteriaceae|g__Citrobacter|s__Citrobacter_europaeus	0.014	0.03	0	0	0.024	0.003	0	0	0	0	0.368	0.059	0	0	0	0	0	0
k__Archaea|p__Euryarchaeota|c__Methanobacteria|o__Methanobacteriales|f__Methanobacteriaceae|g__Methanosphaera|s__Methanosphaera_cuniculi	0	0	0	0	0.024	0.025	0	0	0	0	0	0	0	0	0	0	0	0
k__Bacteria|p__Bacteroidetes|c__Bacteroidia|o__Bacteroidales|f__Prevotellaceae|g__Prevotella|s__Prevotella_sp_CAG_1031	0.022	2.09	0	0	0.048	0.091	0	0	0	0	0	0	0	0	0	0	0	0
k__Bacteria|p__Bacteroidetes|c__Bacteroidia|o__Bacteroidales|f__Bacteroidaceae|g__Bacteroides|s__Bacteroides_caecimuris	0.007	0.106	0	0	0.024	0.079	0	0	0	0	0	0	0	0	0.34	2.59	0	0
k__Bacteria|p__Bacteroidetes|c__Bacteroidia|o__Bacteroidales|f__Porphyromonadaceae|g__Porphyromonas|s__Porphyromonas_sp_HMSC065F10	0.014	0.082	0.044	0.121	0.024	0.053	0	0	0	0	0	0	0	0	0	0	0	0
k__Bacteria|p__Bacteroidetes|c__Bacteroidia|o__Bacteroidales|f__Bacteroidaceae|g__Bacteroides|s__Bacteroides_sp_D2	0.029	0.008	0.033	0.011	0.024	0.013	0	0	0	0	0.053	0.019	0	0	0	0	0	0
k__Bacteria|p__Bacteroidetes|c__Bacteroidia|o__Bacteroidales|f__Tannerellaceae|g__Parabacteroides|s__Parabacteroides_sp_426_9	0	0	0	0	0.048	0.006	0	0	0	0	0	0	0	0	0	0	0	0
k__Bacteria|p__Firmicutes|c__Clostridia|o__Clostridiales|f__Peptococcaceae|g__Peptococcus|s__Peptococcus_niger	0	0	0	0	0.024	0.137	0	0	0	0	0	0	0	0	0	0	0	0
k__Bacteria|p__Proteobacteria|c__Gammaproteobacteria|o__Enterobacterales|f__Morganellaceae|g__Proteus|s__Proteus_mirabilis	0	0	0	0	0.024	0.035	0	0	0	0	0.053	0.084	0	0	0.035	0.03	0.017	0.003
k__Bacteria|p__Actinobacteria|c__Actinobacteria|o__Actinomycetales|f__Actinomycetaceae|g__Actinomyces|s__Actinomyces_turicensis	0.014	0.002	0.011	0.057	0.024	0.034	0	0	0	0	0.053	1.063	0	0	0	0	0	0
k__Bacteria|p__Firmicutes|c__Clostridia|o__Clostridiales|f__Peptostreptococcaceae|g__Peptostreptococcus|s__Peptostreptococcus_anaerobius	0	0	0	0	0.024	0.006	0	0	0	0	0	0	0	0	0	0	0	0
k__Bacteria|p__Bacteroidetes|c__Bacteroidia|o__Bacteroidales|f__Porphyromonadaceae|g__Porphyromonas|s__Porphyromonas_uenonis	0.007	0.006	0.022	0.002	0.024	0.004	0	0	0.062	0.022	0	0	0	0	0	0	0	0
k__Bacteria|p__Firmicutes|c__Tissierellia|o__Tissierellales|f__Peptoniphilaceae|g__Parvimonas|s__Parvimonas_micra	0.043	0.012	0.011	0.421	0.024	0.013	0	0	0.062	0.012	0.105	0.056	0	0	0	0	0	0
k__Bacteria|p__Actinobacteria|c__Actinobacteria|o__Micrococcales|f__Micrococcaceae|g__Rothia|s__Rothia_dentocariosa	0.007	0.002	0.033	0.01	0.024	0.005	0	0	0	0	0	0	0	0	0	0	0	0
k__Bacteria|p__Proteobacteria|c__Betaproteobacteria|o__Neisseriales|f__Neisseriaceae|g__Neisseria|s__Neisseria_flavescens	0	0	0.187	0.007	0	0	0	0	0	0	0	0	0	0	0	0	0	0
k__Bacteria|p__Actinobacteria|c__Actinobacteria|o__Actinomycetales|f__Actinomycetaceae|g__Actinomyces|s__Actinomyces_naeslundii	0	0	0.011	0.013	0	0	0	0	0	0	0	0	0	0	0	0	0	0
k__Bacteria|p__Firmicutes|c__Clostridia|o__Clostridiales|f__Peptostreptococcaceae|g__Peptostreptococcus|s__Peptostreptococcus_stomatis	0	0	0.011	0.007	0	0	0	0	0.062	0.002	0	0	0	0	0	0	0	0
k__Bacteria|p__Firmicutes|c__Bacilli|o__Bacillales|f__Bacillales_unclassified|g__Gemella|s__Gemella_bergeri	0	0	0.011	0.003	0	0	0	0	0	0	0	0	0	0	0	0	0	0
k__Bacteria|p__Actinobacteria|c__Actinobacteria|o__Micrococcales|f__Micrococcaceae|g__Rothia|s__Rothia_aeria	0	0	0.022	0.011	0	0	0	0	0	0	0	0	0	0	0	0	0	0
k__Bacteria|p__Proteobacteria|c__Betaproteobacteria|o__Burkholderiales|f__Burkholderiaceae|g__Ralstonia|s__Ralstonia_pickettii	0	0	0.011	0.003	0	0	0	0	0	0	0	0	0	0	0	0	0	0
k__Bacteria|p__Bacteroidetes|c__Bacteroidia|o__Bacteroidales|f__Prevotellaceae|g__Prevotella|s__Prevotella_melaninogenica	0	0	0.044	0.009	0	0	0	0	0	0	0	0	0	0	0	0	0	0
k__Bacteria|p__Proteobacteria|c__Betaproteobacteria|o__Neisseriales|f__Neisseriaceae|g__Neisseria|s__Neisseria_subflava	0	0	0.099	0.007	0	0	0	0	0	0	0	0	0	0	0	0	0	0
k__Bacteria|p__Actinobacteria|c__Actinobacteria|o__Corynebacteriales|f__Corynebacteriaceae|g__Corynebacterium|s__Corynebacterium_matruchotii	0	0	0.077	0.012	0	0	0	0	0	0	0	0	0	0	0	0	0	0
k__Bacteria|p__Actinobacteria|c__Actinobacteria|o__Propionibacteriales|f__Propionibacteriaceae|g__Cutibacterium|s__Cutibacterium_granulosum	0	0	0.011	0.012	0	0	0	0	0	0	0	0	0	0	0	0	0	0
k__Eukaryota|p__Basidiomycota|c__Malasseziomycetes|o__Malasseziales|f__Malasseziaceae|g__Malassezia|s__Malassezia_restricta	0	0	0.011	0.011	0	0	0	0	0	0	0	0	0	0	0	0	0	0
k__Bacteria|p__Firmicutes|c__Bacilli|o__Lactobacillales|f__Lactobacillaceae|g__Lactobacillus|s__Lactobacillus_crispatus	0.007	0.006	0.022	0.051	0	0	0	0	0	0	0	0	0	0	0	0	0.777	4.704
k__Bacteria|p__Firmicutes|c__Bacilli|o__Lactobacillales|f__Carnobacteriaceae|g__Granulicatella|s__Granulicatella_elegans	0	0	0.011	0.012	0	0	0	0	0	0	0	0	0	0	0	0	0	0
k__Bacteria|p__Actinobacteria|c__Actinobacteria|o__Actinomycetales|f__Actinomycetaceae|g__Actinobaculum|s__Actinobaculum_sp_oral_taxon_183	0	0	0.022	0.011	0	0	0	0	0	0	0	0	0	0	0	0	0	0
k__Bacteria|p__Proteobacteria|c__Gammaproteobacteria|o__Pasteurellales|f__Pasteurellaceae|g__Haemophilus|s__Haemophilus_haemolyticus	0	0	0.011	0.008	0	0	0	0	0	0	0	0	0	0	0	0	0	0
k__Bacteria|p__Firmicutes|c__Firmicutes_unclassified|o__Firmicutes_unclassified|f__Firmicutes_unclassified|g__Firmicutes_unclassified|s__Firmicutes_bacterium_CAG_646	0.014	0.182	0.011	0.15	0	0	0	0	0.062	0.384	0	0	0	0	0	0	0	0
k__Bacteria|p__Proteobacteria|c__Gammaproteobacteria|o__Pseudomonadales|f__Pseudomonadaceae|g__Pseudomonas|s__Pseudomonas_extremaustralis	0	0	0.022	11.399	0	0	0	0	0	0	0	0	0	0	0	0	0	0
k__Bacteria|p__Firmicutes|c__Bacilli|o__Lactobacillales|f__Enterococcaceae|g__Enterococcus|s__Enterococcus_faecalis	0.014	0.058	0.022	0.047	0	0	0	0	0	0	0.316	0.083	0	0	0.206	0.455	0.041	0.066
k__Bacteria|p__Proteobacteria|c__Gammaproteobacteria|o__Pseudomonadales|f__Pseudomonadaceae|g__Pseudomonas|s__Pseudomonas_fluorescens_group	0	0	0.022	0.055	0	0	0	0	0	0	0	0	0	0	0	0	0	0
k__Bacteria|p__Proteobacteria|c__Gammaproteobacteria|o__Pasteurellales|f__Pasteurellaceae|g__Haemophilus|s__Haemophilus_paraphrohaemolyticus	0	0	0.011	0.002	0	0	0	0	0.062	0.002	0	0	0	0	0	0	0	0
k__Bacteria|p__Firmicutes|c__Clostridia|o__Clostridiales|f__Clostridiaceae|g__Clostridium|s__Clostridium_sp_chh4_2	0	0	0.022	0.009	0	0	0	0	0	0	0	0	0	0	0	0	0	0
k__Bacteria|p__Firmicutes|c__Erysipelotrichia|o__Erysipelotrichales|f__Erysipelotrichaceae|g__Solobacterium|s__Solobacterium_moorei	0.014	0.05	0.033	0.011	0	0	0	0	0	0	0.158	0.027	0	0	0	0	0	0
k__Bacteria|p__Firmicutes|c__Tissierellia|o__Tissierellales|f__Peptoniphilaceae|g__Peptoniphilus|s__Peptoniphilus_lacrimalis	0.014	0.004	0.033	0.002	0	0	0	0	0	0	0	0	0	0	0	0	0	0
k__Bacteria|p__Proteobacteria|c__Gammaproteobacteria|o__Pasteurellales|f__Pasteurellaceae|g__Haemophilus|s__Haemophilus_pittmaniae	0.014	0.15	0.022	0.007	0	0	0	0	0	0	0	0	0	0	0	0	0	0
k__Bacteria|p__Bacteroidetes|c__Bacteroidia|o__Bacteroidales|f__Bacteroidaceae|g__Bacteroides|s__Bacteroides_faecichinchillae	0.036	0.081	0.011	0.002	0	0	0	0	0.062	0.003	0.053	0.007	0	0	0.163	0.038	0	0
k__Bacteria|p__Firmicutes|c__Clostridia|o__Clostridiales|f__Lachnospiraceae|g__Lachnoclostridium|s__Lachnoclostridium_sp_An14	0.036	0.007	0.033	0.029	0	0	0	0	0	0	0	0	0	0	0	0	0.025	7.164
k__Bacteria|p__Proteobacteria|c__Betaproteobacteria|o__Neisseriales|f__Neisseriaceae|g__Neisseria|s__Neisseria_macacae	0	0	0.011	0.004	0	0	0	0	0	0	0	0	0	0	0	0	0	0
k__Bacteria|p__Firmicutes|c__Clostridia|o__Clostridiales|f__Eubacteriaceae|g__Eubacterium|s__Eubacterium_coprostanoligenes	0.014	0.033	0.011	0.002	0	0	0	0	0	0	0.895	1.264	0	0	0	0	0	0
k__Bacteria|p__Firmicutes|c__Clostridia|o__Clostridiales|f__Lachnospiraceae|g__Blautia|s__Blautia_sp_N6H1_15	0	0	0.022	0.057	0	0	0	0	0	0	0	0	0	0	0	0	0	0
k__Bacteria|p__Actinobacteria|c__Coriobacteriia|o__Coriobacteriales|f__Atopobiaceae|g__Atopobium|s__Atopobium_minutum	0	0	0.011	0.128	0	0	0	0	0	0	0	0	0	0	0	0	0	0
k__Bacteria|p__Bacteroidetes|c__Bacteroidia|o__Bacteroidales|f__Prevotellaceae|g__Prevotella|s__Prevotella_colorans	0.007	0.015	0.011	0.009	0	0	0	0	0	0	0	0	0	0	0	0	0	0
k__Bacteria|p__Firmicutes|c__Clostridia|o__Clostridiales|f__Lachnospiraceae|g__Blautia|s__Blautia_sp_An249	0	0	0.011	0.027	0	0	0	0	0	0	0	0	0	0	0	0	0.025	0.056
k__Bacteria|p__Actinobacteria|c__Actinobacteria|o__Actinomycetales|f__Actinomycetaceae|g__Varibaculum|s__Varibaculum_cambriense	0.007	0.004	0.022	0.002	0	0	0	0	0	0	0	0	0	0	0	0	0	0
k__Bacteria|p__Firmicutes|c__Clostridia|o__Clostridiales|f__Lachnospiraceae|g__Blautia|s__Blautia_coccoides	0.007	0.006	0.011	0.001	0	0	0	0	0.062	0.013	0	0	0	0	0	0	0	0
k__Bacteria|p__Bacteroidetes|c__Bacteroidia|o__Bacteroidales|f__Tannerellaceae|g__Tannerella|s__Tannerella_sp_oral_taxon_HOT_286	0	0	0.011	0.041	0	0	0	0	0	0	0	0	0	0	0	0	0	0
k__Bacteria|p__Bacteroidetes|c__Bacteroidia|o__Bacteroidales|f__Prevotellaceae|g__Prevotella|s__Prevotella_histicola	0	0	0.011	0.04	0	0	0	0	0	0	0	0	0	0	0	0	0	0
k__Bacteria|p__Bacteroidetes|c__Bacteroidia|o__Bacteroidales|f__Prevotellaceae|g__Alloprevotella|s__Alloprevotella_tannerae	0	0	0.011	0.026	0	0	0	0	0	0	0	0	0	0	0	0	0	0
k__Bacteria|p__Bacteroidetes|c__Bacteroidia|o__Bacteroidales|f__Porphyromonadaceae|g__Porphyromonas|s__Porphyromonas_somerae	0	0	0.011	0.022	0	0	0	0	0	0	0	0	0	0	0	0	0	0
k__Bacteria|p__Actinobacteria|c__Actinobacteria|o__Actinomycetales|f__Actinomycetaceae|g__Actinomyces|s__Actinomyces_sp_oral_taxon_448	0	0	0.011	0.019	0	0	0	0	0	0	0	0	0	0	0	0	0	0
k__Bacteria|p__Fusobacteria|c__Fusobacteriia|o__Fusobacteriales|f__Fusobacteriaceae|g__Fusobacterium|s__Fusobacterium_periodonticum	0	0	0.011	0.018	0	0	0	0	0	0	0.053	0.024	0	0	0	0	0	0
k__Bacteria|p__Bacteroidetes|c__Bacteroidia|o__Bacteroidales|f__Prevotellaceae|g__Prevotella|s__Prevotella_sp_oral_taxon_306	0	0	0.011	0.014	0	0	0	0	0	0	0	0	0	0	0	0	0	0
k__Bacteria|p__Bacteroidetes|c__Bacteroidia|o__Bacteroidales|f__Prevotellaceae|g__Prevotella|s__Prevotella_pallens	0	0	0.011	0.011	0	0	0	0	0	0	0	0	0	0	0	0	0	0
k__Bacteria|p__Proteobacteria|c__Epsilonproteobacteria|o__Campylobacterales|f__Campylobacteraceae|g__Campylobacter|s__Campylobacter_showae	0	0	0.011	0.01	0	0	0	0	0	0	0	0	0	0	0	0	0	0
k__Bacteria|p__Bacteroidetes|c__Bacteroidia|o__Bacteroidales|f__Prevotellaceae|g__Prevotella|s__Prevotella_nigrescens	0	0	0.011	0.004	0	0	0	0	0	0	0	0	0	0	0	0	0	0
k__Bacteria|p__Bacteroidetes|c__Flavobacteriia|o__Flavobacteriales|f__Flavobacteriaceae|g__Capnocytophaga|s__Capnocytophaga_gingivalis	0	0	0.011	0.002	0	0	0	0	0	0	0	0	0	0	0	0	0	0
k__Bacteria|p__Bacteroidetes|c__Bacteroidia|o__Bacteroidales|f__Prevotellaceae|g__Prevotella|s__Prevotella_salivae	0	0	0.011	0.002	0	0	0	0	0	0	0	0	0	0	0	0	0	0
k__Bacteria|p__Firmicutes|c__Clostridia|o__Clostridiales|f__Lachnospiraceae|g__Lachnospiraceae_unclassified|s__Lachnospiraceae_bacterium_oral_taxon_096	0	0	0.011	0.002	0	0	0	0	0.062	0.011	0	0	0	0	0	0	0	0
k__Bacteria|p__Bacteroidetes|c__Bacteroidia|o__Bacteroidales|f__Prevotellaceae|g__Prevotella|s__Prevotella_shahii	0	0	0.011	0.002	0	0	0	0	0	0	0	0	0	0	0	0	0	0
k__Bacteria|p__Fusobacteria|c__Fusobacteriia|o__Fusobacteriales|f__Leptotrichiaceae|g__Leptotrichia|s__Leptotrichia_sp_oral_taxon_215	0	0	0.011	0.001	0	0	0	0	0	0	0	0	0	0	0	0	0	0
k__Bacteria|p__Bacteroidetes|c__Flavobacteriia|o__Flavobacteriales|f__Flavobacteriaceae|g__Capnocytophaga|s__Capnocytophaga_sputigena	0	0	0.011	0.001	0	0	0	0	0	0	0	0	0	0	0	0	0	0
k__Bacteria|p__Proteobacteria|c__Epsilonproteobacteria|o__Campylobacterales|f__Campylobacteraceae|g__Campylobacter|s__Campylobacter_ureolyticus	0	0	0.022	0.616	0	0	0	0	0	0	0	0	0	0	0	0	0	0
k__Bacteria|p__Firmicutes|c__Tissierellia|o__Tissierellales|f__Peptoniphilaceae|g__Parvimonas|s__Parvimonas_sp_oral_taxon_110	0	0	0.011	0.011	0	0	0	0	0	0	0	0	0	0	0	0	0	0
k__Bacteria|p__Firmicutes|c__Clostridia|o__Clostridiales|f__Peptostreptococcaceae|g__Clostridioides|s__Clostridioides_difficile	0	0	0.011	0.008	0	0	0	0	0	0	0.053	0.073	0	0	0	0	0	0
k__Bacteria|p__Firmicutes|c__Tissierellia|o__Tissierellales|f__Peptoniphilaceae|g__Anaerococcus|s__Anaerococcus_vaginalis	0.007	0.026	0.011	0.006	0	0	0	0	0	0	0	0	0	0	0	0	0	0
k__Bacteria|p__Firmicutes|c__Tissierellia|o__Tissierellales|f__Peptoniphilaceae|g__Peptoniphilus|s__Peptoniphilus_sp_HMSC062D09	0.007	0.003	0.011	0.003	0	0	0	0	0	0	0	0	0	0	0	0	0	0
k__Bacteria|p__Actinobacteria|c__Actinobacteria|o__Bifidobacteriales|f__Bifidobacteriaceae|g__Gardnerella|s__Gardnerella_vaginalis	0	0	0.022	0.012	0	0	0	0	0	0	0	0	0	0	0	0	0	0
k__Bacteria|p__Actinobacteria|c__Coriobacteriia|o__Coriobacteriales|f__Atopobiaceae|g__Atopobium|s__Atopobium_vaginae	0	0	0.011	0.007	0	0	0	0	0	0	0	0	0	0	0	0	0	0
k__Bacteria|p__Firmicutes|c__Clostridia|o__Clostridiales|f__Peptostreptococcaceae|g__Criibacterium|s__Criibacterium_bergeronii	0	0	0.011	0.003	0	0	0	0	0	0	0	0	0	0	0	0	0	0
k__Bacteria|p__Firmicutes|c__Bacilli|o__Lactobacillales|f__Lactobacillaceae|g__Lactobacillus|s__Lactobacillus_jensenii	0	0	0.011	0.004	0	0	0	0	0	0	0	0	0	0	0	0	0	0
k__Bacteria|p__Firmicutes|c__Negativicutes|o__Veillonellales|f__Veillonellaceae|g__Dialister|s__Dialister_pneumosintes	0	0	0.011	0.003	0	0	0	0	0.062	0.367	0	0	0	0	0	0	0	0
k__Bacteria|p__Bacteroidetes|c__Bacteroidia|o__Bacteroidales|f__Prevotellaceae|g__Prevotella|s__Prevotella_sp_CAG_873	0	0	0	0	0	0	0	0	0	0	0.474	1.757	0	0	0	0	0	0
k__Bacteria|p__Spirochaetes|c__Spirochaetia|o__Spirochaetales|f__Spirochaetaceae|g__Treponema|s__Treponema_succinifaciens	0	0	0	0	0	0	0	0	0	0	0.368	0.536	0	0	0	0	0	0
k__Bacteria|p__Bacteroidetes|c__Bacteroidia|o__Bacteroidales|f__Prevotellaceae|g__Prevotella|s__Prevotella_sp_CAG_1092	0	0	0	0	0	0	0	0	0	0	0.737	1.038	0	0	0	0	0	0
k__Bacteria|p__Candidatus_Melainabacteria|c__Candidatus_Melainabacteria_unclassified|o__Candidatus_Gastranaerophilales|f__Candidatus_Gastranaerophilales_unclassified|g__Candidatus_Gastranaerophilales_unclassified|s__Candidatus_Gastranaerophilales_bacterium_HUM_9	0	0	0	0	0	0	0	0	0	0	0.316	1.005	0	0	0	0	0	0
k__Bacteria|p__Firmicutes|c__Bacilli|o__Lactobacillales|f__Streptococcaceae|g__Streptococcus|s__Streptococcus_lutetiensis	0	0	0	0	0	0	0	0	0.062	0.277	0.105	0.287	0	0	0.007	0.016	0.008	0.122
k__Bacteria|p__Firmicutes|c__Bacilli|o__Lactobacillales|f__Leuconostocaceae|g__Leuconostoc|s__Leuconostoc_citreum	0	0	0	0	0	0	0	0	0	0	0.579	1.297	0	0	0.014	2.899	0.05	0.072
k__Bacteria|p__Spirochaetes|c__Spirochaetia|o__Spirochaetales|f__Spirochaetaceae|g__Treponema|s__Treponema_berlinense	0	0	0	0	0	0	0	0	0	0	0.316	4.633	0	0	0	0	0	0
k__Bacteria|p__Proteobacteria|c__Gammaproteobacteria|o__Enterobacterales|f__Enterobacteriaceae|g__Citrobacter|s__Citrobacter_youngae	0	0	0	0	0	0	0	0	0	0	0.526	0.155	0	0	0.007	0.065	0	0
k__Bacteria|p__Proteobacteria|c__Gammaproteobacteria|o__Pseudomonadales|f__Moraxellaceae|g__Moraxella|s__Moraxella_osloensis	0	0	0	0	0	0	0	0	0	0	0.526	0.163	0	0	0.007	0.018	0.083	0.625
k__Bacteria|p__Proteobacteria|c__Gammaproteobacteria|o__Pseudomonadales|f__Moraxellaceae|g__Acinetobacter|s__Acinetobacter_johnsonii	0	0	0	0	0	0	0	0	0	0	0.526	0.149	0	0	0.007	0.071	0.091	0.44
k__Bacteria|p__Proteobacteria|c__Alphaproteobacteria|o__Rhodospirillales|f__Rhodospirillales_unclassified|g__Enhydrobacter|s__Enhydrobacter_aerosaccus	0	0	0	0	0	0	0	0	0	0	0.526	0.084	0	0	0.007	0.008	0.058	0.706
k__Bacteria|p__Proteobacteria|c__Gammaproteobacteria|o__Enterobacterales|f__Enterobacteriaceae|g__Citrobacter|s__Citrobacter_portucalensis	0	0	0	0	0	0	0	0	0	0	0.158	0.106	0	0	0	0	0	0
k__Bacteria|p__Proteobacteria|c__Gammaproteobacteria|o__Pseudomonadales|f__Moraxellaceae|g__Acinetobacter|s__Acinetobacter_brisouii	0	0	0	0	0	0	0	0	0	0	0.474	0.05	0	0	0	0	0.008	0.267
k__Bacteria|p__Bacteroidetes|c__Flavobacteriia|o__Flavobacteriales|f__Flavobacteriaceae|g__Chryseobacterium|s__Chryseobacterium_bovis	0	0	0	0	0	0	0	0	0	0	0.368	0.049	0	0	0.007	0.015	0.025	0.508
k__Bacteria|p__Proteobacteria|c__Epsilonproteobacteria|o__Campylobacterales|f__Campylobacteraceae|g__Arcobacter|s__Arcobacter_butzleri	0	0	0	0	0	0	0	0	0	0	0.368	0.035	0	0	0.007	0.035	0.025	0.692
k__Bacteria|p__Proteobacteria|c__Gammaproteobacteria|o__Pseudomonadales|f__Moraxellaceae|g__Acinetobacter|s__Acinetobacter_bereziniae	0	0	0	0	0	0	0	0	0	0	0.316	0.038	0	0	0	0	0	0
k__Bacteria|p__Firmicutes|c__Bacilli|o__Lactobacillales|f__Streptococcaceae|g__Lactococcus|s__Lactococcus_plantarum	0	0	0	0	0	0	0	0	0	0	0.368	0.044	0	0	0.007	0.009	0	0
k__Bacteria|p__Proteobacteria|c__Betaproteobacteria|o__Neisseriales|f__Chromobacteriaceae|g__Microvirgula|s__Microvirgula_aerodenitrificans	0	0	0	0	0	0	0	0	0	0	0.316	0.035	0	0	0.007	0.005	0	0
k__Bacteria|p__Proteobacteria|c__Gammaproteobacteria|o__Aeromonadales|f__Aeromonadaceae|g__Aeromonas|s__Aeromonas_hydrophila	0	0	0	0	0	0	0	0	0	0	0.316	0.034	0	0	0	0	0	0
k__Bacteria|p__Proteobacteria|c__Gammaproteobacteria|o__Enterobacterales|f__Enterobacteriaceae|g__Citrobacter|s__Citrobacter_pasteurii	0	0	0	0	0	0	0	0	0	0	0.211	0.057	0	0	0.007	0.029	0	0
k__Bacteria|p__Tenericutes|c__Mollicutes|o__Mycoplasmatales|f__Mycoplasmataceae|g__Mycoplasma|s__Mycoplasma_mycoides	0	0	0	0	0	0	0	0	0	0	0.158	0.039	0	0	0	0	0	0
k__Bacteria|p__Firmicutes|c__Bacilli|o__Lactobacillales|f__Streptococcaceae|g__Streptococcus|s__Streptococcus_infantarius	0	0	0	0	0	0	0	0	0	0	0.211	0.031	0	0	0	0	0.017	0.124
k__Bacteria|p__Proteobacteria|c__Gammaproteobacteria|o__Enterobacterales|f__Enterobacteriaceae|g__Citrobacter|s__Citrobacter_sp_MGH106	0	0	0	0	0	0	0	0	0	0	0.211	0.027	0	0	0	0	0	0
k__Bacteria|p__Firmicutes|c__Bacilli|o__Lactobacillales|f__Enterococcaceae|g__Enterococcus|s__Enterococcus_italicus	0	0	0	0	0	0	0	0	0	0	0.632	0.22	0	0	0.007	0.009	0.05	0.368
k__Bacteria|p__Proteobacteria|c__Gammaproteobacteria|o__Enterobacterales|f__Enterobacteriaceae|g__Citrobacter|s__Citrobacter_werkmanii	0	0	0	0	0	0	0	0	0	0	0.211	0.024	0	0	0	0	0	0
k__Bacteria|p__Actinobacteria|c__Actinobacteria|o__Corynebacteriales|f__Corynebacteriaceae|g__Corynebacterium|s__Corynebacterium_flavescens	0	0	0	0	0	0	0	0	0	0	0.684	0.372	0	0	0	0	0.025	0.097
k__Bacteria|p__Bacteroidetes|c__Flavobacteriia|o__Flavobacteriales|f__Flavobacteriaceae|g__Chryseobacterium|s__Chryseobacterium_sp_39_10	0	0	0	0	0	0	0	0	0	0	0.158	0.019	0	0	0	0	0.025	3.322
k__Bacteria|p__Firmicutes|c__Clostridia|o__Clostridiales|f__Clostridiaceae|g__Clostridium|s__Clostridium_saccharobutylicum	0	0	0	0	0	0	0	0	0	0	0.579	0.078	0	0	0	0	0	0
k__Bacteria|p__Firmicutes|c__Bacilli|o__Lactobacillales|f__Leuconostocaceae|g__Leuconostoc|s__Leuconostoc_pseudomesenteroides	0	0	0	0	0	0	0	0	0	0	0.421	0.037	0	0	0	0	0.083	0.461
k__Bacteria|p__Proteobacteria|c__Gammaproteobacteria|o__Enterobacterales|f__Enterobacteriaceae|g__Yokenella|s__Yokenella_regensburgei	0	0	0	0	0	0	0	0	0	0	0.053	0.008	0	0	0	0	0	0
k__Bacteria|p__Proteobacteria|c__Epsilonproteobacteria|o__Campylobacterales|f__Campylobacteraceae|g__Campylobacter|s__Campylobacter_jejuni	0	0	0	0	0	0	0	0	0	0	0.053	0.006	0	0	0	0	0.43	1.112
k__Bacteria|p__Fusobacteria|c__Fusobacteriia|o__Fusobacteriales|f__Leptotrichiaceae|g__Sebaldella|s__Sebaldella_termitidis	0	0	0	0	0	0	0	0	0	0	0.053	0.004	0	0	0	0	0.008	0.023
k__Bacteria|p__Bacteroidetes|c__Bacteroidia|o__Bacteroidales|f__Bacteroidaceae|g__Bacteroides|s__Bacteroides_sartorii	0.022	0.147	0	0	0	0	0	0	0	0	0.053	0.052	0	0	0.035	0.198	0	0
k__Bacteria|p__Firmicutes|c__Bacilli|o__Lactobacillales|f__Lactobacillaceae|g__Lactobacillus|s__Lactobacillus_plantarum	0	0	0	0	0	0	0	0	0	0	0.579	0.148	0	0	0	0	0.14	0.937
k__Bacteria|p__Actinobacteria|c__Actinobacteria|o__Corynebacteriales|f__Corynebacteriaceae|g__Corynebacterium|s__Corynebacterium_glutamicum	0	0	0	0	0	0	0	0	0	0	0.105	0.025	0	0	0	0	0.132	0.422
k__Bacteria|p__Proteobacteria|c__Gammaproteobacteria|o__Enterobacterales|f__Enterobacteriaceae|g__Escherichia|s__Escherichia_fergusonii	0	0	0	0	0	0	0	0	0	0	0.053	0.134	0	0	0	0	0.198	0.255
k__Bacteria|p__Proteobacteria|c__Gammaproteobacteria|o__Enterobacterales|f__Enterobacteriaceae|g__Kluyvera|s__Kluyvera_georgiana	0	0	0	0	0	0	0	0	0	0	0.053	0.022	0	0	0	0	0	0
k__Bacteria|p__Firmicutes|c__Bacilli|o__Lactobacillales|f__Enterococcaceae|g__Enterococcus|s__Enterococcus_casseliflavus	0	0	0	0	0	0	0	0	0	0	0.105	0.027	0	0	0	0	0	0
k__Bacteria|p__Spirochaetes|c__Spirochaetia|o__Brachyspirales|f__Brachyspiraceae|g__Brachyspira|s__Brachyspira_pilosicoli	0	0	0	0	0	0	0	0	0	0	0.211	0.284	0	0	0	0	0.083	2.793
k__Bacteria|p__Actinobacteria|c__Actinobacteria|o__Corynebacteriales|f__Corynebacteriaceae|g__Corynebacterium|s__Corynebacterium_variabile	0	0	0	0	0	0	0	0	0	0	0.158	0.063	0	0	0	0	0.116	0.184
k__Bacteria|p__Firmicutes|c__Bacilli|o__Lactobacillales|f__Lactobacillaceae|g__Lactobacillus|s__Lactobacillus_hordei	0	0	0	0	0	0	0	0	0	0	0.105	0.014	0	0	0	0	0	0
k__Bacteria|p__Firmicutes|c__Clostridia|o__Clostridiales|f__Clostridiales_Family_XIII_Incertae_Sedis|g__Mogibacterium|s__Mogibacterium_pumilum	0	0	0	0	0	0	0	0	0	0	0.105	0.009	0	0	0	0	0	0
k__Bacteria|p__Firmicutes|c__Bacilli|o__Lactobacillales|f__Lactobacillaceae|g__Lactobacillus|s__Lactobacillus_brevis	0	0	0	0	0	0	0	0	0	0	0.053	0.007	0	0	0	0	0.074	0.473
k__Bacteria|p__Firmicutes|c__Bacilli|o__Lactobacillales|f__Lactobacillaceae|g__Lactobacillus|s__Lactobacillus_nagelii	0	0	0	0	0	0	0	0	0	0	0.211	0.07	0	0	0	0	0	0
k__Bacteria|p__Firmicutes|c__Bacilli|o__Lactobacillales|f__Enterococcaceae|g__Enterococcus|s__Enterococcus_hirae	0	0	0	0	0	0	0	0	0	0	0.053	0.539	0	0	0	0	0.05	0.029
k__Bacteria|p__Fusobacteria|c__Fusobacteriia|o__Fusobacteriales|f__Fusobacteriaceae|g__Fusobacterium|s__Fusobacterium_varium	0	0	0	0	0	0	0	0	0	0	0.105	0.074	0	0	0	0	0	0
k__Bacteria|p__Firmicutes|c__Bacilli|o__Bacillales|f__Staphylococcaceae|g__Staphylococcus|s__Staphylococcus_cohnii	0	0	0	0	0	0	0	0	0	0	0.053	0.022	0	0	0	0	0.008	0.056
k__Bacteria|p__Firmicutes|c__Clostridia|o__Clostridiales|f__Clostridiaceae|g__Clostridium|s__Clostridium_perfringens	0.007	0.017	0	0	0	0	0	0	0.125	0.007	0.053	0.014	0	0	0	0	0.157	2.411
k__Bacteria|p__Firmicutes|c__Bacilli|o__Lactobacillales|f__Enterococcaceae|g__Enterococcus|s__Enterococcus_gallinarum	0	0	0	0	0	0	0	0	0	0	0.053	0.214	0	0	0.014	0.034	0.008	0.002
k__Bacteria|p__Firmicutes|c__Bacilli|o__Lactobacillales|f__Enterococcaceae|g__Enterococcus|s__Enterococcus_thailandicus	0	0	0	0	0	0	0	0	0	0	0.053	0.117	0	0	0	0	0	0
k__Bacteria|p__Firmicutes|c__Bacilli|o__Lactobacillales|f__Enterococcaceae|g__Enterococcus|s__Enterococcus_avium	0	0	0	0	0	0	0	0	0.062	0.009	0.053	0.011	0	0	0	0	0	0
k__Bacteria|p__Firmicutes|c__Clostridia|o__Clostridiales|f__Lachnospiraceae|g__Oribacterium|s__Oribacterium_parvum	0	0	0	0	0	0	0	0	0	0	0.053	0.126	0	0	0	0	0	0
k__Bacteria|p__Firmicutes|c__Clostridia|o__Clostridiales|f__Lachnospiraceae|g__Oribacterium|s__Oribacterium_sinus	0	0	0	0	0	0	0	0	0	0	0.053	0.044	0	0	0	0	0	0
k__Bacteria|p__Firmicutes|c__Clostridia|o__Clostridiales|f__Clostridiales_Family_XIII_Incertae_Sedis|g__Clostridiales_Family_XIII_Incertae_Sedis_unclassified|s__Eubacterium_brachy	0	0	0	0	0	0	0	0	0	0	0.053	0.027	0	0	0	0	0	0
k__Bacteria|p__Firmicutes|c__Clostridia|o__Clostridiales|f__Clostridiales_Family_XIII_Incertae_Sedis|g__Clostridiales_Family_XIII_Incertae_Sedis_unclassified|s__Eubacterium_infirmum	0	0	0	0	0	0	0	0	0	0	0.105	0.005	0	0	0	0	0	0
k__Bacteria|p__Firmicutes|c__Tissierellia|o__Tissierellales|f__Peptoniphilaceae|g__Parvimonas|s__Parvimonas_sp_oral_taxon_393	0	0	0	0	0	0	0	0	0	0	0.053	0.005	0	0	0	0	0	0
k__Bacteria|p__Actinobacteria|c__Coriobacteriia|o__Coriobacteriales|f__Atopobiaceae|g__Atopobium|s__Atopobium_parvulum	0	0	0	0	0	0	0	0	0	0	0.053	0.014	0	0	0	0	0	0
k__Bacteria|p__Firmicutes|c__Bacilli|o__Lactobacillales|f__Leuconostocaceae|g__Leuconostoc|s__Leuconostoc_suionicum	0	0	0	0	0	0	0	0	0	0	0.053	0.074	0	0	0	0	0	0
k__Bacteria|p__Firmicutes|c__Bacilli|o__Lactobacillales|f__Lactobacillaceae|g__Lactobacillus|s__Lactobacillus_coryniformis	0	0	0	0	0	0	0	0	0	0	0.053	0.034	0	0	0	0	0.025	2.067
k__Bacteria|p__Firmicutes|c__Bacilli|o__Lactobacillales|f__Leuconostocaceae|g__Oenococcus|s__Oenococcus_alcoholitolerans	0	0	0	0	0	0	0	0	0	0	0.053	0.028	0	0	0	0	0.008	0.001
k__Bacteria|p__Firmicutes|c__Bacilli|o__Lactobacillales|f__Lactobacillaceae|g__Lactobacillus|s__Lactobacillus_satsumensis	0	0	0	0	0	0	0	0	0	0	0.053	0.022	0	0	0	0	0	0
k__Bacteria|p__Actinobacteria|c__Actinobacteria|o__Bifidobacteriales|f__Bifidobacteriaceae|g__Bifidobacterium|s__Bifidobacterium_mongoliense	0	0	0	0	0	0	0	0	0	0	0.053	0.018	0	0	0.014	0.093	0.05	3.977
k__Bacteria|p__Chlamydiae|c__Chlamydiia|o__Chlamydiales|f__Chlamydiaceae|g__Chlamydia|s__Chlamydia_ibidis	0	0	0	0	0	0	0	0	0.062	0.013	0	0	0	0	0	0	0.653	5.399
k__Bacteria|p__Firmicutes|c__Clostridia|o__Clostridiales|f__Lachnospiraceae|g__Anaerostipes|s__Anaerostipes_sp_992a	0	0	0	0	0	0	0	0	0.062	0.03	0	0	0	0	0	0	0	0
k__Bacteria|p__Firmicutes|c__Bacilli|o__Lactobacillales|f__Lactobacillaceae|g__Lactobacillus|s__Lactobacillus_paragasseri	0	0	0	0	0	0	0	0	0.062	0.258	0	0	0	0	0	0	0	0
k__Bacteria|p__Proteobacteria|c__Gammaproteobacteria|o__Enterobacterales|f__Enterobacteriaceae|g__Citrobacter|s__Citrobacter_koseri	0	0	0	0	0	0	0	0	0.062	0.01	0	0	0	0	0.014	0.178	0	0
k__Bacteria|p__Bacteroidetes|c__Bacteroidia|o__Bacteroidales|f__Rikenellaceae|g__Alistipes|s__Alistipes_sp_CHKCI003	0	0	0	0	0	0	0	0	0.062	0.116	0	0	0	0	0	0	0.033	0.076
k__Bacteria|p__Proteobacteria|c__Gammaproteobacteria|o__Enterobacterales|f__Morganellaceae|g__Morganella|s__Morganella_morganii	0	0	0	0	0	0	0	0	0.125	0.104	0	0	0	0	0	0	0	0
k__Bacteria|p__Firmicutes|c__Clostridia|o__Clostridiales|f__Lachnospiraceae|g__Murimonas|s__Murimonas_intestini	0	0	0	0	0	0	0	0	0.062	0.005	0	0	0	0	0	0	0	0
k__Bacteria|p__Firmicutes|c__Bacilli|o__Lactobacillales|f__Lactobacillaceae|g__Pediococcus|s__Pediococcus_acidilactici	0	0	0	0	0	0	0	0	0.062	0.04	0	0	0	0	0	0	0	0
k__Bacteria|p__Firmicutes|c__Clostridia|o__Clostridiales|f__Clostridiaceae|g__Butyricicoccus|s__Butyricicoccus_pullicaecorum	0	0	0	0	0	0	0	0	0.125	0.051	0	0	0	0	0	0	0.289	1.663
k__Bacteria|p__Firmicutes|c__Clostridia|o__Clostridiales|f__Ruminococcaceae|g__Gemmiger|s__Gemmiger_sp_An87	0	0	0	0	0	0	0	0	0.062	0.004	0	0	0	0	0	0	0.355	0.907
k__Bacteria|p__Firmicutes|c__Bacilli|o__Lactobacillales|f__Lactobacillaceae|g__Lactobacillus|s__Lactobacillus_curvatus	0	0	0	0	0	0	0	0	0.062	0.011	0	0	0	0	0	0	0.157	0.867
k__Bacteria|p__Firmicutes|c__Clostridia|o__Clostridiales|f__Lachnospiraceae|g__Anaerostipes|s__Anaerostipes_caccae	0.007	0.007	0	0	0	0	0	0	0.125	0.015	0	0	0	0	0	0	0	0
k__Bacteria|p__Proteobacteria|c__Epsilonproteobacteria|o__Campylobacterales|f__Helicobacteraceae|g__Helicobacter|s__Helicobacter_pullorum	0	0	0	0	0	0	0	0	0.062	0.345	0	0	0	0	0	0	0.521	3.14
k__Bacteria|p__Bacteroidetes|c__Bacteroidia|o__Bacteroidales|f__Bacteroidaceae|g__Bacteroides|s__Bacteroides_sp_OM08_11	0	0	0	0	0	0	0	0	0.062	0.022	0	0	0	0	0	0	0	0
k__Bacteria|p__Proteobacteria|c__Gammaproteobacteria|o__Pasteurellales|f__Pasteurellaceae|g__Haemophilus|s__Haemophilus_influenzae	0	0	0	0	0	0	0	0	0.062	0.035	0	0	0	0	0	0	0	0
k__Bacteria|p__Firmicutes|c__Clostridia|o__Clostridiales|f__Lachnospiraceae|g__Lachnoclostridium|s__Lachnoclostridium_sp_An298	0	0	0	0	0	0	0	0	0	0	0	0	0	0	0	0	0.694	2.598
k__Bacteria|p__Bacteroidetes|c__Bacteroidia|o__Bacteroidales|f__Bacteroidaceae|g__Bacteroides|s__Bacteroides_sp_An322	0	0	0	0	0	0	0	0	0	0	0	0	0	0	0	0	0.603	4.078
k__Bacteria|p__Firmicutes|c__Clostridia|o__Clostridiales|f__Lachnospiraceae|g__Lachnoclostridium|s__Lachnoclostridium_sp_An76	0	0	0	0	0	0	0	0	0	0	0	0	0	0	0	0	0.645	1.129
k__Archaea|p__Euryarchaeota|c__Methanobacteria|o__Methanobacteriales|f__Methanobacteriaceae|g__Methanobrevibacter|s__Methanobrevibacter_woesei	0	0	0	0	0	0	0	0	0	0	0	0	0	0	0	0	0.537	3.729
k__Bacteria|p__Firmicutes|c__Negativicutes|o__Selenomonadales|f__Selenomonadaceae|g__Megamonas|s__Megamonas_rupellensis	0	0	0	0	0	0	0	0	0	0	0	0	0	0	0	0	0.653	1.812
k__Bacteria|p__Actinobacteria|c__Actinobacteria|o__Bifidobacteriales|f__Bifidobacteriaceae|g__Bifidobacterium|s__Bifidobacterium_pullorum	0	0	0	0	0	0	0	0	0	0	0	0	0	0	0	0	0.388	0.436
k__Bacteria|p__Actinobacteria|c__Actinobacteria|o__Bifidobacteriales|f__Bifidobacteriaceae|g__Bifidobacterium|s__Bifidobacterium_saeculare	0	0	0	0	0	0	0	0	0	0	0	0	0	0	0	0	0.331	0.382
k__Bacteria|p__Firmicutes|c__Bacilli|o__Lactobacillales|f__Enterococcaceae|g__Enterococcus|s__Enterococcus_cecorum	0	0	0	0	0	0	0	0	0	0	0	0	0	0	0.014	0.067	0.777	2.082
k__Bacteria|p__Firmicutes|c__Bacilli|o__Lactobacillales|f__Lactobacillaceae|g__Lactobacillus|s__Lactobacillus_kitasatonis	0	0	0	0	0	0	0	0	0	0	0	0	0	0	0	0	0.471	1.11
k__Bacteria|p__Bacteroidetes|c__Bacteroidia|o__Bacteroidales|f__Bacteroidaceae|g__Bacteroides|s__Bacteroides_salanitronis	0	0	0	0	0	0	0	0	0	0	0	0	0	0	0	0	0.587	0.509
k__Bacteria|p__Firmicutes|c__Bacilli|o__Lactobacillales|f__Lactobacillaceae|g__Lactobacillus|s__Lactobacillus_gallinarum	0	0	0	0	0	0	0	0	0	0	0	0	0	0	0	0	0.661	5.551
k__Bacteria|p__Actinobacteria|c__Actinobacteria|o__Bifidobacteriales|f__Bifidobacteriaceae|g__Bifidobacterium|s__Bifidobacterium_gallinarum	0	0	0	0	0	0	0	0	0	0	0	0	0	0	0	0	0.24	0.342
k__Bacteria|p__Firmicutes|c__Bacilli|o__Lactobacillales|f__Lactobacillaceae|g__Lactobacillus|s__Lactobacillus_vaginalis	0	0	0	0	0	0	0	0	0	0	0	0	0	0	0	0	0.661	2.264
k__Bacteria|p__Firmicutes|c__Clostridia|o__Clostridiales|f__Lachnospiraceae|g__Lachnoclostridium|s__Lachnoclostridium_sp_An118	0.014	0.007	0	0	0	0	0	0	0	0	0	0	0	0	0	0	0.463	0.136
k__Bacteria|p__Firmicutes|c__Negativicutes|o__Veillonellales|f__Veillonellaceae|g__Megasphaera|s__Megasphaera_stantonii	0	0	0	0	0	0	0	0	0	0	0	0	0	0	0	0	0.355	0.361
k__Bacteria|p__Proteobacteria|c__Gammaproteobacteria|o__Pasteurellales|f__Pasteurellaceae|g__Gallibacterium|s__Gallibacterium_anatis	0	0	0	0	0	0	0	0	0	0	0	0	0	0	0	0	0.314	1.663
k__Bacteria|p__Firmicutes|c__Clostridia|o__Clostridiales|f__Lachnospiraceae|g__Lachnoclostridium|s__Lachnoclostridium_sp_An196	0	0	0	0	0	0	0	0	0	0	0	0	0	0	0	0	0.603	0.734
k__Bacteria|p__Firmicutes|c__Bacilli|o__Lactobacillales|f__Lactobacillaceae|g__Lactobacillus|s__Lactobacillus_ingluviei	0	0	0	0	0	0	0	0	0	0	0	0	0	0	0	0	0.579	1.144
k__Bacteria|p__Firmicutes|c__Clostridia|o__Clostridiales|f__Ruminococcaceae|g__Anaeromassilibacillus|s__Anaeromassilibacillus_sp_An200	0	0	0	0	0	0	0	0	0	0	0	0	0	0	0	0	0.256	0.306
k__Bacteria|p__Firmicutes|c__Bacilli|o__Lactobacillales|f__Lactobacillaceae|g__Lactobacillus|s__Lactobacillus_agilis	0	0	0	0	0	0	0	0	0	0	0	0	0	0	0	0	0.537	1.051
k__Bacteria|p__Firmicutes|c__Bacilli|o__Lactobacillales|f__Leuconostocaceae|g__Leuconostoc|s__Leuconostoc_gelidum	0	0	0	0	0	0	0	0	0	0	0	0	0	0	0	0	0.017	0.02
k__Bacteria|p__Proteobacteria|c__Epsilonproteobacteria|o__Campylobacterales|f__Campylobacteraceae|g__Campylobacter|s__Campylobacter_avium	0	0	0	0	0	0	0	0	0	0	0	0	0	0	0	0	0.256	2.489
k__Bacteria|p__Firmicutes|c__Clostridia|o__Clostridiales|f__Ruminococcaceae|g__Anaeromassilibacillus|s__Anaeromassilibacillus_sp_An172	0	0	0	0	0	0	0	0	0	0	0	0	0	0	0	0	0.479	0.75
k__Bacteria|p__Proteobacteria|c__Epsilonproteobacteria|o__Campylobacterales|f__Campylobacteraceae|g__Campylobacter|s__Campylobacter_coli	0	0	0	0	0	0	0	0	0	0	0	0	0	0	0	0	0.306	1.791
k__Bacteria|p__Firmicutes|c__Clostridia|o__Clostridiales|f__Ruminococcaceae|g__Gemmiger|s__Gemmiger_sp_An50	0	0	0	0	0	0	0	0	0	0	0	0	0	0	0	0	0.529	0.468
k__Bacteria|p__Firmicutes|c__Clostridia|o__Clostridiales|f__Ruminococcaceae|g__Flavonifractor|s__Flavonifractor_sp_An82	0	0	0	0	0	0	0	0	0	0	0	0	0	0	0	0	0.479	0.436
k__Bacteria|p__Chlamydiae|c__Chlamydiia|o__Chlamydiales|f__Chlamydiaceae|g__Chlamydia|s__Chlamydia_gallinacea	0	0	0	0	0	0	0	0	0	0	0	0	0	0	0	0	0.074	0.71
k__Bacteria|p__Firmicutes|c__Bacilli|o__Lactobacillales|f__Lactobacillaceae|g__Lactobacillus|s__Lactobacillus_gigeriorum	0	0	0	0	0	0	0	0	0	0	0	0	0	0	0	0	0.091	0.425
k__Bacteria|p__Firmicutes|c__Bacilli|o__Lactobacillales|f__Lactobacillaceae|g__Lactobacillus|s__Lactobacillus_aviarius	0	0	0	0	0	0	0	0	0	0	0	0	0	0	0	0	0.76	5.073
k__Bacteria|p__Firmicutes|c__Clostridia|o__Clostridiales|f__Clostridiales_unclassified|g__Clostridiales_unclassified|s__Clostridiales_bacterium_CHKCI001	0	0	0	0	0	0	0	0	0	0	0	0	0	0	0	0	0.19	0.239
k__Bacteria|p__Firmicutes|c__Clostridia|o__Clostridiales|f__Ruminococcaceae|g__Subdoligranulum|s__Subdoligranulum_variabile	0	0	0	0	0	0	0	0	0	0	0	0	0	0	0	0	0.149	0.341
k__Bacteria|p__Firmicutes|c__Clostridia|o__Clostridiales|f__Ruminococcaceae|g__Gemmiger|s__Gemmiger_sp_An194	0	0	0	0	0	0	0	0	0	0	0	0	0	0	0	0	0.347	0.492
k__Bacteria|p__Firmicutes|c__Clostridia|o__Clostridiales|f__Ruminococcaceae|g__Gemmiger|s__Gemmiger_sp_An120	0	0	0	0	0	0	0	0	0	0	0	0	0	0	0	0	0.645	0.939
k__Bacteria|p__Firmicutes|c__Bacilli|o__Lactobacillales|f__Carnobacteriaceae|g__Jeotgalibaca|s__Jeotgalibaca_sp_PTS2502	0	0	0	0	0	0	0	0	0	0	0	0	0	0	0	0	0.074	0.21
k__Bacteria|p__Actinobacteria|c__Actinobacteria|o__Corynebacteriales|f__Corynebacteriaceae|g__Corynebacterium|s__Corynebacterium_xerosis	0	0	0	0	0	0	0	0	0	0	0	0	0	0	0	0	0.182	0.689
k__Bacteria|p__Actinobacteria|c__Actinobacteria|o__Corynebacteriales|f__Corynebacteriaceae|g__Corynebacterium|s__Corynebacterium_stationis	0	0	0	0	0	0	0	0	0	0	0	0	0	0	0.007	0.588	0.24	0.879
k__Bacteria|p__Firmicutes|c__Erysipelotrichia|o__Erysipelotrichales|f__Erysipelotrichaceae|g__Erysipelothrix|s__Erysipelothrix_larvae	0	0	0	0	0	0	0	0	0	0	0	0	0	0	0	0	0.149	0.423
k__Bacteria|p__Proteobacteria|c__Alphaproteobacteria|o__Rhodobacterales|f__Rhodobacteraceae|g__Paracoccus|s__Paracoccus_sp_CBA4604	0	0	0	0	0	0	0	0	0	0	0	0	0	0	0	0	0.058	0.424
k__Bacteria|p__Firmicutes|c__Bacilli|o__Lactobacillales|f__Enterococcaceae|g__Enterococcus|s__Enterococcus_aquimarinus	0	0	0	0	0	0	0	0	0	0	0	0	0	0	0	0	0.099	0.281
k__Bacteria|p__Proteobacteria|c__Gammaproteobacteria|o__Enterobacterales|f__Enterobacteriaceae|g__Escherichia|s__Escherichia_albertii	0	0	0	0	0	0	0	0	0	0	0	0	0	0	0	0	0.074	0.18
k__Bacteria|p__Firmicutes|c__Bacilli|o__Lactobacillales|f__Aerococcaceae|g__Aerococcus|s__Aerococcus_urinaeequi	0	0	0	0	0	0	0	0	0	0	0	0	0	0	0	0	0.124	0.244
k__Bacteria|p__Firmicutes|c__Bacilli|o__Lactobacillales|f__Aerococcaceae|g__Aerococcaceae_unclassified|s__Aerococcaceae_bacterium	0	0	0	0	0	0	0	0	0	0	0	0	0	0	0	0	0.116	0.259
k__Bacteria|p__Proteobacteria|c__Gammaproteobacteria|o__Pseudomonadales|f__Moraxellaceae|g__Psychrobacter|s__Psychrobacter_piechaudii	0	0	0	0	0	0	0	0	0	0	0	0	0	0	0	0	0.116	0.204
k__Bacteria|p__Firmicutes|c__Bacilli|o__Lactobacillales|f__Carnobacteriaceae|g__Atopostipes|s__Atopostipes_suicloacalis	0	0	0	0	0	0	0	0	0	0	0	0	0	0	0	0	0.058	0.192
k__Bacteria|p__Proteobacteria|c__Gammaproteobacteria|o__Pseudomonadales|f__Moraxellaceae|g__Psychrobacter|s__Psychrobacter_pasteurii	0	0	0	0	0	0	0	0	0	0	0	0	0	0	0	0	0.14	0.176
k__Bacteria|p__Firmicutes|c__Bacilli|o__Lactobacillales|f__Leuconostocaceae|g__Weissella|s__Weissella_hellenica	0	0	0	0	0	0	0	0	0	0	0	0	0	0	0	0	0.033	0.068
k__Bacteria|p__Actinobacteria|c__Actinobacteria|o__Bifidobacteriales|f__Bifidobacteriaceae|g__Bifidobacterium|s__Bifidobacterium_pseudolongum	0	0	0	0	0	0	0	0	0	0	0	0	0	0	0.319	4.179	0.19	0.198
k__Bacteria|p__Firmicutes|c__Clostridia|o__Clostridiales|f__Clostridiaceae|g__Candidatus_Arthromitus|s__Candidatus_Arthromitus_sp_SFB_turkey	0	0	0	0	0	0	0	0	0	0	0	0	0	0	0	0	0.149	0.41
k__Bacteria|p__Elusimicrobia|c__Elusimicrobia|o__Elusimicrobiales|f__Elusimicrobiaceae|g__Elusimicrobium|s__Elusimicrobium_sp_An273	0	0	0	0	0	0	0	0	0	0	0	0	0	0	0	0	0.099	0.515
k__Bacteria|p__Firmicutes|c__Bacilli|o__Lactobacillales|f__Lactobacillaceae|g__Lactobacillus|s__Lactobacillus_saerimneri	0	0	0	0	0	0	0	0	0	0	0	0	0	0	0	0	0.339	0.129
k__Bacteria|p__Deferribacteres|c__Deferribacteres|o__Deferribacterales|f__Deferribacteraceae|g__Mucispirillum|s__Mucispirillum_schaedleri	0	0	0	0	0	0	0	0	0	0	0	0	0	0	0.369	4.926	0.256	0.121
k__Bacteria|p__Firmicutes|c__Clostridia|o__Clostridiales|f__Ruminococcaceae|g__Pseudoflavonifractor|s__Pseudoflavonifractor_sp_An85	0	0	0	0	0	0	0	0	0	0	0	0	0	0	0	0	0.207	0.16
k__Bacteria|p__Firmicutes|c__Bacilli|o__Lactobacillales|f__Lactobacillaceae|g__Lactobacillus|s__Lactobacillus_oris	0	0	0	0	0	0	0	0	0	0	0	0	0	0	0	0	0.438	0.403
k__Bacteria|p__Bacteroidetes|c__Flavobacteriia|o__Flavobacteriales|f__Flavobacteriaceae|g__Chryseobacterium|s__Chryseobacterium_sp_VAUSW3	0	0	0	0	0	0	0	0	0	0	0	0	0	0	0	0	0.107	1.415
k__Bacteria|p__Bacteroidetes|c__Flavobacteriia|o__Flavobacteriales|f__Flavobacteriaceae|g__Chryseobacterium|s__Chryseobacterium_chaponense	0	0	0	0	0	0	0	0	0	0	0	0	0	0	0	0	0.017	0.076
k__Bacteria|p__Deinococcus-Thermus|c__Deinococci|o__Deinococcales|f__Deinococcaceae|g__Deinococcus|s__Deinococcus_swuensis	0	0	0	0	0	0	0	0	0	0	0	0	0	0	0	0	0.041	0.123
k__Bacteria|p__Proteobacteria|c__Gammaproteobacteria|o__Pseudomonadales|f__Moraxellaceae|g__Psychrobacter|s__Psychrobacter_sp_1501_2011	0	0	0	0	0	0	0	0	0	0	0	0	0	0	0	0	0.041	0.062
k__Bacteria|p__Proteobacteria|c__Betaproteobacteria|o__Burkholderiales|f__Comamonadaceae|g__Melaminivora|s__Melaminivora_sp_SC2_9	0	0	0	0	0	0	0	0	0	0	0	0	0	0	0	0	0.041	0.54
k__Bacteria|p__Proteobacteria|c__Gammaproteobacteria|o__Xanthomonadales|f__Xanthomonadaceae|g__Luteimonas|s__Luteimonas_sp_83_4	0	0	0	0	0	0	0	0	0	0	0	0	0	0	0	0	0.041	0.111
k__Bacteria|p__Bacteroidetes|c__Sphingobacteriia|o__Sphingobacteriales|f__Sphingobacteriaceae|g__Sphingobacterium|s__Sphingobacterium_faecium	0	0	0	0	0	0	0	0	0	0	0	0	0	0	0	0	0.017	0.815
k__Bacteria|p__Bacteroidetes|c__Sphingobacteriia|o__Sphingobacteriales|f__Sphingobacteriaceae|g__Sphingobacterium|s__Sphingobacterium_cellulitidis	0	0	0	0	0	0	0	0	0	0	0	0	0	0	0	0	0.05	0.193
k__Bacteria|p__Actinobacteria|c__Actinobacteria|o__Micrococcales|f__Dermabacteraceae|g__Brachybacterium|s__Brachybacterium_faecium	0	0	0	0	0	0	0	0	0	0	0	0	0	0	0	0	0.091	1.536
k__Bacteria|p__Proteobacteria|c__Gammaproteobacteria|o__Pseudomonadales|f__Moraxellaceae|g__Psychrobacter|s__Psychrobacter_cryohalolentis	0	0	0	0	0	0	0	0	0	0	0	0	0	0	0	0	0.041	0.037
k__Bacteria|p__Proteobacteria|c__Gammaproteobacteria|o__Pseudomonadales|f__Moraxellaceae|g__Psychrobacter|s__Psychrobacter_immobilis	0	0	0	0	0	0	0	0	0	0	0	0	0	0	0	0	0.041	0.054
k__Bacteria|p__Proteobacteria|c__Alphaproteobacteria|o__Rhodobacterales|f__Rhodobacteraceae|g__Paracoccus|s__Paracoccus_sanguinis	0	0	0	0	0	0	0	0	0	0	0	0	0	0	0	0	0.017	0.033
k__Bacteria|p__Bacteroidetes|c__Flavobacteriia|o__Flavobacteriales|f__Flavobacteriaceae|g__Algoriella|s__Algoriella_xinjiangensis	0	0	0	0	0	0	0	0	0	0	0	0	0	0	0	0	0.008	0.014
k__Bacteria|p__Proteobacteria|c__Gammaproteobacteria|o__Pseudomonadales|f__Pseudomonadaceae|g__Pseudomonas|s__Pseudomonas_fragi	0	0	0	0	0	0	0	0	0	0	0	0	0	0	0	0	0.025	0.044
k__Bacteria|p__Bacteroidetes|c__Flavobacteriia|o__Flavobacteriales|f__Flavobacteriaceae|g__Chryseobacterium|s__Chryseobacterium_haifense	0	0	0	0	0	0	0	0	0	0	0	0	0	0	0	0	0.05	0.046
k__Bacteria|p__Proteobacteria|c__Gammaproteobacteria|o__Pseudomonadales|f__Moraxellaceae|g__Psychrobacter|s__Psychrobacter_sp_Sarcosine_3u_12	0	0	0	0	0	0	0	0	0	0	0	0	0	0	0	0	0.017	0.01
k__Bacteria|p__Proteobacteria|c__Gammaproteobacteria|o__Pseudomonadales|f__Moraxellaceae|g__Psychrobacter|s__Psychrobacter_piscatorii	0	0	0	0	0	0	0	0	0	0	0	0	0	0	0	0	0.025	0.104
k__Bacteria|p__Proteobacteria|c__Gammaproteobacteria|o__Pseudomonadales|f__Moraxellaceae|g__Acinetobacter|s__Acinetobacter_celticus	0	0	0	0	0	0	0	0	0	0	0	0	0	0	0	0	0.008	0.007
k__Bacteria|p__Proteobacteria|c__Epsilonproteobacteria|o__Campylobacterales|f__Campylobacteraceae|g__Arcobacter|s__Arcobacter_cryaerophilus	0	0	0	0	0	0	0	0	0	0	0	0	0	0	0	0	0.074	6.871
k__Bacteria|p__Actinobacteria|c__Actinobacteria|o__Micrococcales|f__Dermabacteraceae|g__Brachybacterium|s__Brachybacterium_alimentarium	0	0	0	0	0	0	0	0	0	0	0	0	0	0	0	0	0.033	0.144
k__Bacteria|p__Proteobacteria|c__Gammaproteobacteria|o__Pseudomonadales|f__Moraxellaceae|g__Psychrobacter|s__Psychrobacter_pacificensis	0	0	0	0	0	0	0	0	0	0	0	0	0	0	0	0	0.041	0.046
k__Bacteria|p__Proteobacteria|c__Gammaproteobacteria|o__Pseudomonadales|f__Moraxellaceae|g__Acinetobacter|s__Acinetobacter_parvus	0	0	0	0	0	0	0	0	0	0	0	0	0	0	0	0	0.05	0.306
k__Bacteria|p__Proteobacteria|c__Gammaproteobacteria|o__Pseudomonadales|f__Pseudomonadaceae|g__Pseudomonas|s__Pseudomonas_lundensis	0	0	0	0	0	0	0	0	0	0	0	0	0	0	0	0	0.025	0.08
k__Bacteria|p__Proteobacteria|c__Alphaproteobacteria|o__Sphingomonadales|f__Sphingomonadaceae|g__Sphingopyxis|s__Sphingopyxis_granuli	0	0	0	0	0	0	0	0	0	0	0	0	0	0	0	0	0.008	0.002
k__Bacteria|p__Proteobacteria|c__Gammaproteobacteria|o__Pasteurellales|f__Pasteurellaceae|g__Avibacterium|s__Avibacterium_endocarditidis	0	0	0	0	0	0	0	0	0	0	0	0	0	0	0	0	0.025	0.27
k__Bacteria|p__Proteobacteria|c__Gammaproteobacteria|o__Pasteurellales|f__Pasteurellaceae|g__Avibacterium|s__Avibacterium_gallinarum	0	0	0	0	0	0	0	0	0	0	0	0	0	0	0	0	0.017	0.271
k__Bacteria|p__Proteobacteria|c__Gammaproteobacteria|o__Pasteurellales|f__Pasteurellaceae|g__Avibacterium|s__Avibacterium_avium	0	0	0	0	0	0	0	0	0	0	0	0	0	0	0	0	0.008	0.243
k__Bacteria|p__Firmicutes|c__Bacilli|o__Lactobacillales|f__Streptococcaceae|g__Streptococcus|s__Streptococcus_suis	0	0	0	0	0	0	0	0	0	0	0	0	0	0	0	0	0.017	0.211
k__Bacteria|p__Proteobacteria|c__Gammaproteobacteria|o__Pasteurellales|f__Pasteurellaceae|g__Avibacterium|s__Avibacterium_paragallinarum	0	0	0	0	0	0	0	0	0	0	0	0	0	0	0	0	0.041	0.072
k__Bacteria|p__Firmicutes|c__Bacilli|o__Bacillales|f__Staphylococcaceae|g__Jeotgalicoccus|s__Jeotgalicoccus_halophilus	0	0	0	0	0	0	0	0	0	0	0	0	0	0	0	0	0.107	0.204
k__Bacteria|p__Bacteroidetes|c__Flavobacteriia|o__Flavobacteriales|f__Flavobacteriaceae|g__Riemerella|s__Riemerella_anatipestifer	0	0	0	0	0	0	0	0	0	0	0	0	0	0	0	0	0.033	0.226
k__Bacteria|p__Bacteroidetes|c__Bacteroidia|o__Bacteroidales|f__Bacteroidaceae|g__Mediterranea|s__Mediterranea_sp_An20	0	0	0	0	0	0	0	0	0	0	0	0	0	0	0	0	0.405	2.32
k__Bacteria|p__Proteobacteria|c__Alphaproteobacteria|o__Rhodobacterales|f__Rhodobacteraceae|g__Paracoccus|s__Paracoccus_sphaerophysae	0	0	0	0	0	0	0	0	0	0	0	0	0	0	0	0	0.025	0.009
k__Bacteria|p__Proteobacteria|c__Gammaproteobacteria|o__Enterobacterales|f__Enterobacteriaceae|g__Escherichia|s__Escherichia_marmotae	0	0	0	0	0	0	0	0	0	0	0	0	0	0	0	0	0.033	0.066
k__Bacteria|p__Firmicutes|c__Bacilli|o__Lactobacillales|f__Aerococcaceae|g__Aerococcus|s__Aerococcus_viridans	0	0	0	0	0	0	0	0	0	0	0	0	0	0	0	0	0.116	0.254
k__Bacteria|p__Firmicutes|c__Bacilli|o__Lactobacillales|f__Carnobacteriaceae|g__Trichococcus|s__Trichococcus_flocculiformis	0	0	0	0	0	0	0	0	0	0	0	0	0	0	0	0	0.033	0.022
k__Bacteria|p__Firmicutes|c__Bacilli|o__Bacillales|f__Staphylococcaceae|g__Staphylococcus|s__Staphylococcus_lentus	0	0	0	0	0	0	0	0	0	0	0	0	0	0	0.007	0.011	0.05	0.398
k__Bacteria|p__Firmicutes|c__Bacilli|o__Lactobacillales|f__Enterococcaceae|g__Enterococcus|s__Enterococcus_durans	0	0	0	0	0	0	0	0	0	0	0	0	0	0	0	0	0.041	0.181
k__Bacteria|p__Proteobacteria|c__Deltaproteobacteria|o__Desulfovibrionales|f__Desulfovibrionaceae|g__Lawsonia|s__Lawsonia_intracellularis	0	0	0	0	0	0	0	0	0	0	0	0	0	0	0	0	0.025	0.46
k__Bacteria|p__Firmicutes|c__Bacilli|o__Lactobacillales|f__Leuconostocaceae|g__Weissella|s__Weissella_koreensis	0	0	0	0	0	0	0	0	0	0	0	0	0	0	0	0	0.025	0.034
k__Bacteria|p__Actinobacteria|c__Actinobacteria|o__Micrococcales|f__Intrasporangiaceae|g__Janibacter|s__Janibacter_terrae	0	0	0	0	0	0	0	0	0	0	0	0	0	0	0	0	0.008	0.056
k__Bacteria|p__Firmicutes|c__Bacilli|o__Lactobacillales|f__Carnobacteriaceae|g__Carnobacterium|s__Carnobacterium_sp_AT7	0	0	0	0	0	0	0	0	0	0	0	0	0	0	0	0	0.008	0.018
k__Bacteria|p__Firmicutes|c__Bacilli|o__Lactobacillales|f__Carnobacteriaceae|g__Carnobacterium|s__Carnobacterium_inhibens	0	0	0	0	0	0	0	0	0	0	0	0	0	0	0	0	0.008	0.006
k__Bacteria|p__Actinobacteria|c__Actinobacteria|o__Micrococcales|f__Micrococcaceae|g__Kocuria|s__Kocuria_polaris	0	0	0	0	0	0	0	0	0	0	0	0	0	0	0	0	0.05	0.323
k__Bacteria|p__Actinobacteria|c__Actinobacteria|o__Micrococcales|f__Micrococcaceae|g__Kocuria|s__Kocuria_rosea	0	0	0	0	0	0	0	0	0	0	0	0	0	0	0	0	0.058	0.197
k__Bacteria|p__Actinobacteria|c__Actinobacteria|o__Propionibacteriales|f__Propionibacteriaceae|g__Luteococcus|s__Luteococcus_japonicus	0	0	0	0	0	0	0	0	0	0	0	0	0	0	0	0	0.041	0.265
k__Bacteria|p__Firmicutes|c__Bacilli|o__Lactobacillales|f__Lactobacillaceae|g__Lactobacillus|s__Lactobacillus_coleohominis	0	0	0	0	0	0	0	0	0	0	0	0	0	0	0	0	0.025	0.039
k__Bacteria|p__Actinobacteria|c__Actinobacteria|o__Corynebacteriales|f__Corynebacteriaceae|g__Corynebacterium|s__Corynebacterium_urealyticum	0	0	0	0	0	0	0	0	0	0	0	0	0	0	0	0	0.041	0.196
k__Bacteria|p__Proteobacteria|c__Gammaproteobacteria|o__Xanthomonadales|f__Xanthomonadaceae|g__Xanthomonas|s__Xanthomonas_sacchari	0	0	0	0	0	0	0	0	0	0	0	0	0	0	0	0	0.033	0.28
k__Bacteria|p__Proteobacteria|c__Gammaproteobacteria|o__Xanthomonadales|f__Xanthomonadaceae|g__Stenotrophomonas|s__Stenotrophomonas_sp_SPM	0	0	0	0	0	0	0	0	0	0	0	0	0	0	0	0	0.008	0.01
k__Bacteria|p__Proteobacteria|c__Gammaproteobacteria|o__Enterobacterales|f__Erwiniaceae|g__Pantoea|s__Pantoea_ananatis	0	0	0	0	0	0	0	0	0	0	0	0	0	0	0	0	0.025	0.105
k__Bacteria|p__Firmicutes|c__Bacilli|o__Lactobacillales|f__Streptococcaceae|g__Streptococcus|s__Streptococcus_pluranimalium	0	0	0	0	0	0	0	0	0	0	0	0	0	0	0	0	0.025	0.071
k__Bacteria|p__Firmicutes|c__Bacilli|o__Bacillales|f__Staphylococcaceae|g__Staphylococcus|s__Staphylococcus_equorum	0	0	0	0	0	0	0	0	0	0	0	0	0	0	0	0	0.05	0.455
k__Bacteria|p__Actinobacteria|c__Actinobacteria|o__Corynebacteriales|f__Corynebacteriaceae|g__Corynebacterium|s__Corynebacterium_ammoniagenes	0	0	0	0	0	0	0	0	0	0	0	0	0	0	0	0	0.033	0.014
k__Bacteria|p__Firmicutes|c__Bacilli|o__Lactobacillales|f__Enterococcaceae|g__Vagococcus|s__Vagococcus_lutrae	0	0	0	0	0	0	0	0	0	0	0	0	0	0	0	0	0.017	0.004
k__Bacteria|p__Firmicutes|c__Bacilli|o__Bacillales|f__Staphylococcaceae|g__Jeotgalicoccus|s__Jeotgalicoccus_halotolerans	0	0	0	0	0	0	0	0	0	0	0	0	0	0	0	0	0.041	0.006
k__Bacteria|p__Firmicutes|c__Bacilli|o__Lactobacillales|f__Leuconostocaceae|g__Weissella|s__Weissella_jogaejeotgali	0	0	0	0	0	0	0	0	0	0	0	0	0	0	0	0	0.041	0.04
k__Bacteria|p__Bacteroidetes|c__Flavobacteriia|o__Flavobacteriales|f__Flavobacteriaceae|g__Ornithobacterium|s__Ornithobacterium_rhinotracheale	0	0	0	0	0	0	0	0	0	0	0	0	0	0	0	0	0.008	0.003
k__Bacteria|p__Firmicutes|c__Bacilli|o__Lactobacillales|f__Enterococcaceae|g__Catellicoccus|s__Catellicoccus_marimammalium	0	0	0	0	0	0	0	0	0	0	0	0	0	0	0	0	0.107	0.384
k__Bacteria|p__Bacteroidetes|c__Bacteroidia|o__Bacteroidales|f__Tannerellaceae|g__Parabacteroides|s__Parabacteroides_sp_An277	0	0	0	0	0	0	0	0	0	0	0	0	0	0	0	0	0.074	0.762
k__Bacteria|p__Firmicutes|c__Clostridia|o__Clostridiales|f__Eubacteriaceae|g__Eubacterium|s__Eubacterium_sp_An11	0	0	0	0	0	0	0	0	0	0	0	0	0	0	0	0	0.041	0.064
k__Bacteria|p__Firmicutes|c__Bacilli|o__Lactobacillales|f__Lactobacillaceae|g__Lactobacillus|s__Lactobacillus_frumenti	0	0	0	0	0	0	0	0	0	0	0	0	0	0	0	0	0.008	0.017
k__Bacteria|p__Firmicutes|c__Bacilli|o__Lactobacillales|f__Lactobacillaceae|g__Lactobacillus|s__Lactobacillus_panis	0	0	0	0	0	0	0	0	0	0	0	0	0	0	0	0	0.083	0.056
k__Bacteria|p__Firmicutes|c__Bacilli|o__Lactobacillales|f__Leuconostocaceae|g__Weissella|s__Weissella_thailandensis	0	0	0	0	0	0	0	0	0	0	0	0	0	0	0	0	0.05	0.046
k__Bacteria|p__Actinobacteria|c__Actinobacteria|o__Corynebacteriales|f__Corynebacteriaceae|g__Corynebacterium|s__Corynebacterium_nuruki	0	0	0	0	0	0	0	0	0	0	0	0	0	0	0	0	0.025	0.009
k__Bacteria|p__Firmicutes|c__Bacilli|o__Lactobacillales|f__Lactobacillaceae|g__Lactobacillus|s__Lactobacillus_farciminis	0	0	0	0	0	0	0	0	0	0	0	0	0	0	0	0	0.033	0.027
k__Bacteria|p__Firmicutes|c__Bacilli|o__Lactobacillales|f__Leuconostocaceae|g__Leuconostoc|s__Leuconostoc_garlicum	0	0	0	0	0	0	0	0	0	0	0	0	0	0	0	0	0.017	0.1
k__Bacteria|p__Firmicutes|c__Bacilli|o__Lactobacillales|f__Lactobacillaceae|g__Lactobacillus|s__Lactobacillus_pobuzihii	0	0	0	0	0	0	0	0	0	0	0	0	0	0	0	0	0.008	0.001
k__Bacteria|p__Firmicutes|c__Bacilli|o__Lactobacillales|f__Lactobacillaceae|g__Lactobacillus|s__Lactobacillus_sanfranciscensis	0	0	0	0	0	0	0	0	0	0	0	0	0	0	0	0	0.017	0.811
k__Bacteria|p__Firmicutes|c__Bacilli|o__Lactobacillales|f__Lactobacillaceae|g__Lactobacillus|s__Lactobacillus_murinus	0	0	0	0	0	0	0	0	0	0	0	0	0	0	0.596	7.236	0.033	5.47
k__Bacteria|p__Firmicutes|c__Bacilli|o__Lactobacillales|f__Lactobacillaceae|g__Lactobacillus|s__Lactobacillus_xiangfangensis	0	0	0	0	0	0	0	0	0	0	0	0	0	0	0	0	0.008	0.095
k__Bacteria|p__Firmicutes|c__Bacilli|o__Lactobacillales|f__Lactobacillaceae|g__Lactobacillus|s__Lactobacillus_heilongjiangensis	0	0	0	0	0	0	0	0	0	0	0	0	0	0	0	0	0.008	0.081
k__Bacteria|p__Firmicutes|c__Bacilli|o__Lactobacillales|f__Lactobacillaceae|g__Lactobacillus|s__Lactobacillus_rossiae	0	0	0	0	0	0	0	0	0	0	0	0	0	0	0	0	0.025	0.455
k__Bacteria|p__Fusobacteria|c__Fusobacteriia|o__Fusobacteriales|f__Fusobacteriaceae|g__Fusobacterium|s__Fusobacterium_necrogenes	0	0	0	0	0	0	0	0	0	0	0	0	0	0	0	0	0.182	0.701
k__Bacteria|p__Firmicutes|c__Clostridia|o__Clostridiales|f__Lachnospiraceae|g__Tyzzerella|s__Tyzzerella_sp_An114	0	0	0	0	0	0	0	0	0	0	0	0	0	0	0	0	0.124	0.433
k__Bacteria|p__Proteobacteria|c__Betaproteobacteria|o__Burkholderiales|f__Comamonadaceae|g__Giesbergeria|s__Giesbergeria_anulus	0	0	0	0	0	0	0	0	0	0	0	0	0	0	0	0	0.008	0.009
k__Bacteria|p__Proteobacteria|c__Gammaproteobacteria|o__Pseudomonadales|f__Moraxellaceae|g__Acinetobacter|s__Acinetobacter_bohemicus	0	0	0	0	0	0	0	0	0	0	0	0	0	0	0	0	0.008	0.005
k__Bacteria|p__Proteobacteria|c__Betaproteobacteria|o__Burkholderiales|f__Comamonadaceae|g__Acidovorax|s__Acidovorax_defluvii	0	0	0	0	0	0	0	0	0	0	0	0	0	0	0	0	0.008	0.005
k__Bacteria|p__Proteobacteria|c__Gammaproteobacteria|o__Alteromonadales|f__Shewanellaceae|g__Shewanella|s__Shewanella_morhuae	0	0	0	0	0	0	0	0	0	0	0	0	0	0	0	0	0.008	0.001
k__Bacteria|p__Proteobacteria|c__Epsilonproteobacteria|o__Campylobacterales|f__Helicobacteraceae|g__Helicobacter|s__Helicobacter_equorum	0	0	0	0	0	0	0	0	0	0	0	0	0	0	0	0	0.099	0.248
k__Bacteria|p__Spirochaetes|c__Spirochaetia|o__Brachyspirales|f__Brachyspiraceae|g__Brachyspira|s__Brachyspira_intermedia	0	0	0	0	0	0	0	0	0	0	0	0	0	0	0	0	0.017	0.019
k__Bacteria|p__Proteobacteria|c__Gammaproteobacteria|o__Pasteurellales|f__Pasteurellaceae|g__Gallibacterium|s__Gallibacterium_salpingitidis	0	0	0	0	0	0	0	0	0	0	0	0	0	0	0	0	0.033	0.496
k__Bacteria|p__Proteobacteria|c__Betaproteobacteria|o__Burkholderiales|f__Alcaligenaceae|g__Alcaligenes|s__Alcaligenes_faecalis	0	0	0	0	0	0	0	0	0	0	0	0	0	0	0	0	0.017	0.012
k__Bacteria|p__Actinobacteria|c__Actinobacteria|o__Corynebacteriales|f__Corynebacteriaceae|g__Corynebacterium|s__Corynebacterium_casei	0	0	0	0	0	0	0	0	0	0	0	0	0	0	0	0	0.017	0.127
k__Bacteria|p__Firmicutes|c__Clostridia|o__Clostridiales|f__Lachnospiraceae|g__Lachnoclostridium|s__Lachnoclostridium_sp_An181	0	0	0	0	0	0	0	0	0	0	0	0	0	0	0	0	0.033	1.191
k__Bacteria|p__Proteobacteria|c__Gammaproteobacteria|o__Enterobacterales|f__Erwiniaceae|g__Pantoea|s__Pantoea_dispersa	0	0	0	0	0	0	0	0	0	0	0	0	0	0	0	0	0.008	0.03
k__Bacteria|p__Proteobacteria|c__Gammaproteobacteria|o__Enterobacterales|f__Enterobacteriaceae|g__Leclercia|s__Leclercia_adecarboxylata	0	0	0	0	0	0	0	0	0	0	0	0	0	0	0	0	0.033	0.2
k__Bacteria|p__Proteobacteria|c__Gammaproteobacteria|o__Enterobacterales|f__Erwiniaceae|g__Pantoea|s__Pantoea_eucrina	0	0	0	0	0	0	0	0	0	0	0	0	0	0	0	0	0.008	0.001
k__Bacteria|p__Actinobacteria|c__Actinobacteria|o__Micrococcales|f__Micrococcaceae|g__Kocuria|s__Kocuria_palustris	0	0	0	0	0	0	0	0	0	0	0	0	0	0	0	0	0.025	0.026
k__Bacteria|p__Actinobacteria|c__Actinobacteria|o__Micrococcales|f__Micrococcaceae|g__Kocuria|s__Kocuria_indica	0	0	0	0	0	0	0	0	0	0	0	0	0	0	0	0	0.017	0.002
k__Bacteria|p__Proteobacteria|c__Epsilonproteobacteria|o__Campylobacterales|f__Helicobacteraceae|g__Helicobacter|s__Helicobacter_brantae	0	0	0	0	0	0	0	0	0	0	0	0	0	0	0	0	0.017	1.245
k__Bacteria|p__Firmicutes|c__Bacilli|o__Lactobacillales|f__Streptococcaceae|g__Streptococcus|s__Streptococcus_uberis	0	0	0	0	0	0	0	0	0	0	0	0	0	0	0	0	0.008	0.054
k__Bacteria|p__Actinobacteria|c__Actinobacteria|o__Corynebacteriales|f__Tsukamurellaceae|g__Tsukamurella|s__Tsukamurella_tyrosinosolvens	0	0	0	0	0	0	0	0	0	0	0	0	0	0	0	0	0.008	0.035
k__Bacteria|p__Firmicutes|c__Bacilli|o__Lactobacillales|f__Streptococcaceae|g__Streptococcus|s__Streptococcus_hongkongensis	0	0	0	0	0	0	0	0	0	0	0	0	0	0	0	0	0.008	0.035
k__Bacteria|p__Firmicutes|c__Bacilli|o__Lactobacillales|f__Enterococcaceae|g__Enterococcus|s__Enterococcus_columbae	0	0	0	0	0	0	0	0	0	0	0	0	0	0	0	0	0.074	0.209
k__Bacteria|p__Actinobacteria|c__Actinobacteria|o__Corynebacteriales|f__Tsukamurellaceae|g__Tsukamurella|s__Tsukamurella_pulmonis	0	0	0	0	0	0	0	0	0	0	0	0	0	0	0	0	0.008	0.025
k__Bacteria|p__Bacteroidetes|c__Flavobacteriia|o__Flavobacteriales|f__Flavobacteriaceae|g__Soonwooa|s__Soonwooa_buanensis	0	0	0	0	0	0	0	0	0	0	0	0	0	0	0	0	0.041	0.839
k__Bacteria|p__Actinobacteria|c__Actinobacteria|o__Actinomycetales|f__Actinomycetaceae|g__Actinomyces|s__Actinomyces_nasicola	0	0	0	0	0	0	0	0	0	0	0	0	0	0	0	0	0.025	0.114
k__Bacteria|p__Proteobacteria|c__Gammaproteobacteria|o__Pseudomonadales|f__Moraxellaceae|g__Acinetobacter|s__Acinetobacter_towneri	0	0	0	0	0	0	0	0	0	0	0	0	0	0	0	0	0.083	0.47
k__Bacteria|p__Bacteroidetes|c__Flavobacteriia|o__Flavobacteriales|f__Flavobacteriaceae|g__Chryseobacterium|s__Chryseobacterium_sp_YLOS41	0	0	0	0	0	0	0	0	0	0	0	0	0	0	0	0	0.017	2.657
k__Bacteria|p__Proteobacteria|c__Betaproteobacteria|o__Burkholderiales|f__Comamonadaceae|g__Melaminivora|s__Melaminivora_sp_SC2_7	0	0	0	0	0	0	0	0	0	0	0	0	0	0	0	0	0.008	0.003
k__Bacteria|p__Proteobacteria|c__Epsilonproteobacteria|o__Campylobacterales|f__Helicobacteraceae|g__Helicobacter|s__Helicobacter_anseris	0	0	0	0	0	0	0	0	0	0	0	0	0	0	0	0	0.041	0.217
k__Bacteria|p__Proteobacteria|c__Alphaproteobacteria|o__Rhodobacterales|f__Rhodobacteraceae|g__Rhodobacter|s__Rhodobacter_capsulatus	0	0	0	0	0	0	0	0	0	0	0	0	0	0	0	0	0.025	0.739
k__Bacteria|p__Bacteroidetes|c__Bacteroidia|o__Bacteroidales|f__Bacteroidaceae|g__Bacteroides|s__Bacteroides_graminisolvens	0	0	0	0	0	0	0	0	0	0	0	0	0	0	0	0	0.091	1.688
k__Bacteria|p__Actinobacteria|c__Actinobacteria|o__Corynebacteriales|f__Dietziaceae|g__Dietzia|s__Dietzia_alimentaria	0	0	0	0	0	0	0	0	0	0	0	0	0	0	0	0	0.05	1.489
k__Bacteria|p__Tenericutes|c__Mollicutes|o__Mycoplasmatales|f__Mycoplasmataceae|g__Mycoplasma|s__Mycoplasma_cloacale	0	0	0	0	0	0	0	0	0	0	0	0	0	0	0	0	0.008	0.008
k__Bacteria|p__Proteobacteria|c__Gammaproteobacteria|o__Pseudomonadales|f__Pseudomonadaceae|g__Pseudomonas|s__Pseudomonas_sp_TC_11	0	0	0	0	0	0	0	0	0	0	0	0	0	0	0	0	0.017	3.271
k__Bacteria|p__Proteobacteria|c__Gammaproteobacteria|o__Pseudomonadales|f__Moraxellaceae|g__Acinetobacter|s__Acinetobacter_lwoffii	0	0	0	0	0	0	0	0	0	0	0	0	0	0	0	0	0.074	1.062
k__Bacteria|p__Actinobacteria|c__Actinobacteria|o__Corynebacteriales|f__Corynebacteriaceae|g__Corynebacterium|s__Corynebacterium_efficiens	0	0	0	0	0	0	0	0	0	0	0	0	0	0	0	0	0.025	1.109
k__Bacteria|p__Firmicutes|c__Clostridia|o__Clostridiales|f__Clostridiaceae|g__Proteiniclasticum|s__Proteiniclasticum_ruminis	0	0	0	0	0	0	0	0	0	0	0	0	0	0	0	0	0.025	0.932
k__Bacteria|p__Proteobacteria|c__Gammaproteobacteria|o__Xanthomonadales|f__Xanthomonadaceae|g__Stenotrophomonas|s__Stenotrophomonas_koreensis	0	0	0	0	0	0	0	0	0	0	0	0	0	0	0	0	0.041	1.341
k__Bacteria|p__Bacteroidetes|c__Sphingobacteriia|o__Sphingobacteriales|f__Sphingobacteriaceae|g__Arcticibacter|s__Arcticibacter_pallidicorallinus	0	0	0	0	0	0	0	0	0	0	0	0	0	0	0	0	0.008	2.192
k__Bacteria|p__Proteobacteria|c__Gammaproteobacteria|o__Pseudomonadales|f__Pseudomonadaceae|g__Pseudomonas|s__Pseudomonas_kunmingensis	0	0	0	0	0	0	0	0	0	0	0	0	0	0	0	0	0.017	1.286
k__Bacteria|p__Actinobacteria|c__Actinobacteria|o__Corynebacteriales|f__Corynebacteriaceae|g__Corynebacterium|s__Corynebacterium_marinum	0	0	0	0	0	0	0	0	0	0	0	0	0	0	0	0	0.017	1.049
k__Bacteria|p__Actinobacteria|c__Actinobacteria|o__Micrococcales|f__Micrococcaceae|g__Micrococcus|s__Micrococcus_terreus	0	0	0	0	0	0	0	0	0	0	0	0	0	0	0	0	0.017	1.074
k__Bacteria|p__Actinobacteria|c__Actinobacteria|o__Micrococcales|f__Sanguibacteraceae|g__Sanguibacter|s__Sanguibacter_marinus	0	0	0	0	0	0	0	0	0	0	0	0	0	0	0	0	0.025	0.508
k__Bacteria|p__Bacteroidetes|c__Flavobacteriia|o__Flavobacteriales|f__Flavobacteriaceae|g__Flavobacteriaceae_unclassified|s__Flavobacteriaceae_bacterium_3519_10	0	0	0	0	0	0	0	0	0	0	0	0	0	0	0	0	0.008	1.082
k__Bacteria|p__Proteobacteria|c__Gammaproteobacteria|o__Pseudomonadales|f__Moraxellaceae|g__Acinetobacter|s__Acinetobacter_gandensis	0	0	0	0	0	0	0	0	0	0	0	0	0	0	0	0	0.041	0.38
k__Bacteria|p__Proteobacteria|c__Betaproteobacteria|o__Neisseriales|f__Neisseriaceae|g__Prolinoborus|s__Prolinoborus_fasciculus	0	0	0	0	0	0	0	0	0	0	0	0	0	0	0	0	0.025	0.31
k__Bacteria|p__Proteobacteria|c__Gammaproteobacteria|o__Xanthomonadales|f__Xanthomonadaceae|g__Stenotrophomonas|s__Stenotrophomonas_rhizophila	0	0	0	0	0	0	0	0	0	0	0	0	0	0	0.043	0.425	0.008	0.696
k__Bacteria|p__Proteobacteria|c__Betaproteobacteria|o__Burkholderiales|f__Comamonadaceae|g__Acidovorax|s__Acidovorax_sp_NO_1	0	0	0	0	0	0	0	0	0	0	0	0	0	0	0	0	0.008	0.548
k__Bacteria|p__Proteobacteria|c__Alphaproteobacteria|o__Rhodobacterales|f__Rhodobacteraceae|g__Paracoccus|s__Paracoccus_chinensis	0	0	0	0	0	0	0	0	0	0	0	0	0	0	0	0	0.008	0.525
k__Bacteria|p__Actinobacteria|c__Actinobacteria|o__Micrococcales|f__Jonesiaceae|g__Jonesia|s__Jonesia_denitrificans	0	0	0	0	0	0	0	0	0	0	0	0	0	0	0	0	0.008	0.374
k__Bacteria|p__Bacteroidetes|c__Sphingobacteriia|o__Sphingobacteriales|f__Sphingobacteriaceae|g__Sphingobacterium|s__Sphingobacterium_mizutaii	0	0	0	0	0	0	0	0	0	0	0	0	0	0	0	0	0.066	0.081
k__Bacteria|p__Actinobacteria|c__Actinobacteria|o__Micrococcales|f__Microbacteriaceae|g__Microbacterium|s__Microbacterium_sp_AR7_10	0	0	0	0	0	0	0	0	0	0	0	0	0	0	0	0	0.008	0.336
k__Bacteria|p__Proteobacteria|c__Gammaproteobacteria|o__Aeromonadales|f__Aeromonadaceae|g__Aeromonas|s__Aeromonas_caviae	0	0	0	0	0	0	0	0	0	0	0	0	0	0	0	0	0.05	0.656
k__Bacteria|p__Actinobacteria|c__Actinobacteria|o__Micrococcales|f__Dermabacteraceae|g__Brachybacterium|s__Brachybacterium_muris	0	0	0	0	0	0	0	0	0	0	0	0	0	0	0	0	0.008	0.31
k__Bacteria|p__Bacteroidetes|c__Flavobacteriia|o__Flavobacteriales|f__Flavobacteriaceae|g__Chryseobacterium|s__Chryseobacterium_treverense	0	0	0	0	0	0	0	0	0	0	0	0	0	0	0	0	0.008	0.306
k__Bacteria|p__Proteobacteria|c__Alphaproteobacteria|o__Caulobacterales|f__Caulobacteraceae|g__Brevundimonas|s__Brevundimonas_naejangsanensis	0	0	0	0	0	0	0	0	0	0	0	0	0	0	0	0	0.008	0.269
k__Bacteria|p__Bacteroidetes|c__Flavobacteriia|o__Flavobacteriales|f__Flavobacteriaceae|g__Chryseobacterium|s__Chryseobacterium_solincola	0	0	0	0	0	0	0	0	0	0	0	0	0	0	0	0	0.017	0.153
k__Bacteria|p__Proteobacteria|c__Alphaproteobacteria|o__Rhodobacterales|f__Rhodobacteraceae|g__Rhodobacter|s__Rhodobacter_blasticus	0	0	0	0	0	0	0	0	0	0	0	0	0	0	0	0	0.008	0.241
k__Bacteria|p__Proteobacteria|c__Gammaproteobacteria|o__Cellvibrionales|f__Cellvibrionaceae|g__Cellvibrio|s__Cellvibrio_sp_BR	0	0	0	0	0	0	0	0	0	0	0	0	0	0	0	0	0.025	0.135
k__Bacteria|p__Actinobacteria|c__Actinobacteria|o__Micrococcales|f__Ruaniaceae|g__Ruaniaceae_unclassified|s__Ruaniaceae_bacterium_KH17	0	0	0	0	0	0	0	0	0	0	0	0	0	0	0	0	0.008	0.23
k__Bacteria|p__Bacteroidetes|c__Flavobacteriia|o__Flavobacteriales|f__Flavobacteriaceae|g__Cloacibacterium|s__Cloacibacterium_normanense	0	0	0	0	0	0	0	0	0	0	0	0	0	0	0	0	0.033	0.272
k__Bacteria|p__Firmicutes|c__Bacilli|o__Lactobacillales|f__Lactobacillaceae|g__Lactobacillus|s__Lactobacillus_concavus	0	0	0	0	0	0	0	0	0	0	0	0	0	0	0	0	0.05	0.263
k__Bacteria|p__Actinobacteria|c__Actinobacteria|o__Corynebacteriales|f__Corynebacteriaceae|g__Corynebacterium|s__Corynebacterium_pollutisoli	0	0	0	0	0	0	0	0	0	0	0	0	0	0	0	0	0.033	0.077
k__Bacteria|p__Proteobacteria|c__Gammaproteobacteria|o__Alteromonadales|f__Shewanellaceae|g__Shewanella|s__Shewanella_putrefaciens	0	0	0	0	0	0	0	0	0	0	0	0	0	0	0	0	0.025	0.15
k__Bacteria|p__Actinobacteria|c__Actinobacteria|o__Propionibacteriales|f__Propionibacteriaceae|g__Tessaracoccus|s__Tessaracoccus_flavus	0	0	0	0	0	0	0	0	0	0	0	0	0	0	0	0	0.008	0.138
k__Bacteria|p__Bacteroidetes|c__Bacteroidia|o__Bacteroidales|f__Tannerellaceae|g__Parabacteroides|s__Parabacteroides_chartae	0	0	0	0	0	0	0	0	0	0	0	0	0	0	0	0	0.05	0.11
k__Bacteria|p__Proteobacteria|c__Gammaproteobacteria|o__Pseudomonadales|f__Moraxellaceae|g__Acinetobacter|s__Acinetobacter_schindleri	0	0	0	0	0	0	0	0	0	0	0	0	0	0	0	0	0.033	0.063
k__Bacteria|p__Actinobacteria|c__Actinobacteria|o__Micrococcales|f__Micrococcaceae|g__Glutamicibacter|s__Glutamicibacter_sp	0	0	0	0	0	0	0	0	0	0	0	0	0	0	0	0	0.033	0.057
k__Bacteria|p__Bacteroidetes|c__Flavobacteriia|o__Flavobacteriales|f__Flavobacteriaceae|g__Chryseobacterium|s__Chryseobacterium_indoltheticum	0	0	0	0	0	0	0	0	0	0	0	0	0	0	0	0	0.008	0.101
k__Bacteria|p__Firmicutes|c__Clostridia|o__Clostridiales|f__Clostridiaceae|g__Proteiniclasticum|s__Proteiniclasticum_sp	0	0	0	0	0	0	0	0	0	0	0	0	0	0	0	0	0.008	0.099
k__Bacteria|p__Bacteroidetes|c__Bacteroidia|o__Bacteroidales|f__Bacteroidaceae|g__Bacteroides|s__Bacteroides_reticulotermitis	0	0	0	0	0	0	0	0	0	0	0	0	0	0	0	0	0.025	0.075
k__Bacteria|p__Actinobacteria|c__Actinobacteria|o__Corynebacteriales|f__Dietziaceae|g__Dietzia|s__Dietzia_maris	0	0	0	0	0	0	0	0	0	0	0	0	0	0	0	0	0.008	0.074
k__Bacteria|p__Proteobacteria|c__Gammaproteobacteria|o__Aeromonadales|f__Aeromonadaceae|g__Aeromonas|s__Aeromonas_media	0	0	0	0	0	0	0	0	0	0	0	0	0	0	0	0	0.041	0.178
k__Bacteria|p__Proteobacteria|c__Betaproteobacteria|o__Burkholderiales|f__Alcaligenaceae|g__Pusillimonas|s__Pusillimonas_sp_JR1_69_3_13	0	0	0	0	0	0	0	0	0	0	0	0	0	0	0	0	0.008	0.067
k__Bacteria|p__Actinobacteria|c__Actinobacteria|o__Corynebacteriales|f__Corynebacteriaceae|g__Corynebacterium|s__Corynebacterium_freneyi	0	0	0	0	0	0	0	0	0	0	0	0	0	0	0	0	0.017	0.035
k__Bacteria|p__Proteobacteria|c__Alphaproteobacteria|o__Rhodobacterales|f__Rhodobacteraceae|g__Paracoccus|s__Paracoccus_sp_WN007	0	0	0	0	0	0	0	0	0	0	0	0	0	0	0	0	0.008	0.055
k__Bacteria|p__Actinobacteria|c__Actinobacteria|o__Micrococcales|f__Sanguibacteraceae|g__Sanguibacter|s__Sanguibacter_soli	0	0	0	0	0	0	0	0	0	0	0	0	0	0	0	0	0.008	0.054
k__Bacteria|p__Proteobacteria|c__Gammaproteobacteria|o__Chromatiales|f__Chromatiaceae|g__Rheinheimera|s__Rheinheimera_sp_KL1	0	0	0	0	0	0	0	0	0	0	0	0	0	0	0	0	0.025	0.211
k__Bacteria|p__Proteobacteria|c__Betaproteobacteria|o__Burkholderiales|f__Comamonadaceae|g__Comamonas|s__Comamonas_sp_JNW	0	0	0	0	0	0	0	0	0	0	0	0	0	0	0	0	0.017	0.018
k__Bacteria|p__Bacteroidetes|c__Flavobacteriia|o__Flavobacteriales|f__Flavobacteriaceae|g__Flavobacterium|s__Flavobacterium_ummariense	0	0	0	0	0	0	0	0	0	0	0	0	0	0	0	0	0.017	0.028
k__Bacteria|p__Bacteroidetes|c__Sphingobacteriia|o__Sphingobacteriales|f__Sphingobacteriaceae|g__Sphingobacterium|s__Sphingobacterium_nematocida	0	0	0	0	0	0	0	0	0	0	0	0	0	0	0	0	0.008	0.021
k__Bacteria|p__Firmicutes|c__Bacilli|o__Lactobacillales|f__Aerococcaceae|g__Globicatella|s__Globicatella_sulfidifaciens	0	0	0	0	0	0	0	0	0	0	0	0	0	0	0	0	0.041	0.034
k__Bacteria|p__Proteobacteria|c__Gammaproteobacteria|o__Pseudomonadales|f__Pseudomonadaceae|g__Pseudomonas|s__Pseudomonas_saudiphocaensis	0	0	0	0	0	0	0	0	0	0	0	0	0	0	0	0	0.008	0.016
k__Bacteria|p__Firmicutes|c__Bacilli|o__Lactobacillales|f__Streptococcaceae|g__Streptococcus|s__Streptococcus_parauberis	0	0	0	0	0	0	0	0	0	0	0	0	0	0	0.007	0.001	0.017	0.009
k__Bacteria|p__Actinobacteria|c__Actinobacteria|o__Corynebacteriales|f__Dietziaceae|g__Dietzia|s__Dietzia_cinnamea	0	0	0	0	0	0	0	0	0	0	0	0	0	0	0	0	0.008	0.006
k__Bacteria|p__Actinobacteria|c__Actinobacteria|o__Micrococcales|f__Intrasporangiaceae|g__Ornithinimicrobium|s__Ornithinimicrobium_pekingense	0	0	0	0	0	0	0	0	0	0	0	0	0	0	0	0	0.008	0.005
k__Bacteria|p__Bacteroidetes|c__Cytophagia|o__Cytophagales|f__Cytophagaceae|g__Cytophaga|s__Cytophaga_xylanolytica	0	0	0	0	0	0	0	0	0	0	0	0	0	0	0	0	0.008	0.004
k__Bacteria|p__Firmicutes|c__Bacilli|o__Lactobacillales|f__Lactobacillaceae|g__Lactobacillus|s__Lactobacillus_manihotivorans	0	0	0	0	0	0	0	0	0	0	0	0	0	0	0	0	0.066	2.123
k__Bacteria|p__Proteobacteria|c__Gammaproteobacteria|o__Pasteurellales|f__Pasteurellaceae|g__Gallibacterium|s__Gallibacterium_genomosp_3	0	0	0	0	0	0	0	0	0	0	0	0	0	0	0	0	0.017	10.57
k__Bacteria|p__Firmicutes|c__Clostridia|o__Clostridiales|f__Peptostreptococcaceae|g__Romboutsia|s__Romboutsia_hominis	0	0	0	0	0	0	0	0	0	0	0	0	0	0	0	0	0.008	0.465
k__Bacteria|p__Firmicutes|c__Clostridia|o__Clostridiales|f__Peptostreptococcaceae|g__Paeniclostridium|s__Paeniclostridium_sordellii	0	0	0	0	0	0	0	0	0	0	0	0	0	0	0	0	0.017	0.076
k__Bacteria|p__Proteobacteria|c__Alphaproteobacteria|o__Rhodospirillales|f__Acetobacteraceae|g__Acetobacter|s__Acetobacter_orientalis	0	0	0	0	0	0	0	0	0	0	0	0	0	0	0	0	0.058	0.423
k__Bacteria|p__Firmicutes|c__Bacilli|o__Lactobacillales|f__Lactobacillaceae|g__Lactobacillus|s__Lactobacillus_nantensis	0	0	0	0	0	0	0	0	0	0	0	0	0	0	0	0	0.017	0.483
k__Bacteria|p__Firmicutes|c__Bacilli|o__Lactobacillales|f__Leuconostocaceae|g__Weissella|s__Weissella_viridescens	0	0	0	0	0	0	0	0	0	0	0	0	0	0	0	0	0.008	0.341
k__Bacteria|p__Firmicutes|c__Bacilli|o__Lactobacillales|f__Lactobacillaceae|g__Lactobacillus|s__Lactobacillus_parabrevis	0	0	0	0	0	0	0	0	0	0	0	0	0	0	0	0	0.008	0.025
k__Bacteria|p__Firmicutes|c__Bacilli|o__Lactobacillales|f__Lactobacillaceae|g__Lactobacillus|s__Lactobacillus_paralimentarius	0	0	0	0	0	0	0	0	0	0	0	0	0	0	0	0	0.008	0.039
k__Bacteria|p__Firmicutes|c__Bacilli|o__Lactobacillales|f__Lactobacillaceae|g__Lactobacillus|s__Lactobacillus_siliginis	0	0	0	0	0	0	0	0	0	0	0	0	0	0	0	0	0.008	0.019
k__Bacteria|p__Firmicutes|c__Bacilli|o__Lactobacillales|f__Enterococcaceae|g__Enterococcus|s__Enterococcus_ratti	0	0	0	0	0	0	0	0	0	0	0	0	0	0	0	0	0.008	0.008
k__Bacteria|p__Firmicutes|c__Bacilli|o__Lactobacillales|f__Lactobacillaceae|g__Pediococcus|s__Pediococcus_argentinicus	0	0	0	0	0	0	0	0	0	0	0	0	0	0	0	0	0.05	0.082
k__Bacteria|p__Proteobacteria|c__Gammaproteobacteria|o__Pseudomonadales|f__Pseudomonadaceae|g__Pseudomonas|s__Pseudomonas_alcaliphila	0	0	0	0	0	0	0	0	0	0	0	0	0	0	0	0	0.008	3.024
k__Bacteria|p__Proteobacteria|c__Gammaproteobacteria|o__Pseudomonadales|f__Pseudomonadaceae|g__Pseudomonas|s__Pseudomonas_putida_group	0	0	0	0	0	0	0	0	0	0	0	0	0	0	0	0	0.017	0.078
k__Bacteria|p__Firmicutes|c__Clostridia|o__Clostridiales|f__Peptostreptococcaceae|g__Terrisporobacter|s__Terrisporobacter_othiniensis	0	0	0	0	0	0	0	0	0	0	0	0	0	0	0	0	0.017	0.102
k__Bacteria|p__Firmicutes|c__Bacilli|o__Bacillales|f__Bacillaceae|g__Lysinibacillus|s__Lysinibacillus_contaminans	0	0	0	0	0	0	0	0	0	0	0	0	0	0	0	0	0.017	0.314
k__Eukaryota|p__Ascomycota|c__Saccharomycetes|o__Saccharomycetales|f__Debaryomycetaceae|g__Candida|s__Candida_parapsilosis	0	0	0	0	0	0	0	0	0	0	0	0	0	0	0	0	0.017	0.037
k__Bacteria|p__Firmicutes|c__Clostridia|o__Clostridiales|f__Clostridiaceae|g__Clostridium|s__Clostridium_sp_7_2_43FAA	0	0	0	0	0	0	0	0	0	0	0	0	0	0	0	0	0.017	0.266
k__Bacteria|p__Proteobacteria|c__Gammaproteobacteria|o__Enterobacterales|f__Enterobacteriaceae|g__Enterobacter|s__Enterobacter_bugandensis	0	0	0	0	0	0	0	0	0	0	0	0	0	0	0	0	0.008	0.205
k__Bacteria|p__Proteobacteria|c__Gammaproteobacteria|o__Enterobacterales|f__Enterobacteriaceae|g__Pseudescherichia|s__Pseudescherichia_vulneris	0	0	0	0	0	0	0	0	0	0	0	0	0	0	0	0	0.008	0.835
k__Bacteria|p__Firmicutes|c__Bacilli|o__Lactobacillales|f__Lactobacillaceae|g__Lactobacillus|s__Lactobacillus_koreensis	0	0	0	0	0	0	0	0	0	0	0	0	0	0	0	0	0.017	0.026
k__Bacteria|p__Firmicutes|c__Bacilli|o__Lactobacillales|f__Leuconostocaceae|g__Weissella|s__Weissella_paramesenteroides	0	0	0	0	0	0	0	0	0	0	0	0	0	0	0	0	0.074	0.156
k__Bacteria|p__Firmicutes|c__Bacilli|o__Bacillales|f__Planococcaceae|g__Kurthia|s__Kurthia_sp_11kri321	0	0	0	0	0	0	0	0	0	0	0	0	0	0	0	0	0.025	0.105
k__Bacteria|p__Firmicutes|c__Bacilli|o__Lactobacillales|f__Lactobacillaceae|g__Lactobacillus|s__Lactobacillus_pontis	0	0	0	0	0	0	0	0	0	0	0	0	0	0	0	0	0.017	0.096
k__Bacteria|p__Firmicutes|c__Bacilli|o__Bacillales|f__Staphylococcaceae|g__Macrococcus|s__Macrococcus_caseolyticus	0	0	0	0	0	0	0	0	0	0	0	0	0	0	0	0	0.025	0.03
k__Bacteria|p__Proteobacteria|c__Gammaproteobacteria|o__Pseudomonadales|f__Moraxellaceae|g__Acinetobacter|s__Acinetobacter_variabilis	0	0	0	0	0	0	0	0	0	0	0	0	0	0	0	0	0.033	0.053
k__Bacteria|p__Proteobacteria|c__Gammaproteobacteria|o__Enterobacterales|f__Morganellaceae|g__Proteus|s__Proteus_hauseri	0	0	0	0	0	0	0	0	0	0	0	0	0	0	0	0	0.008	0.023
k__Bacteria|p__Firmicutes|c__Bacilli|o__Lactobacillales|f__Enterococcaceae|g__Enterococcus|s__Enterococcus_asini	0	0	0	0	0	0	0	0	0	0	0	0	0	0	0	0	0.017	0.081
k__Bacteria|p__Proteobacteria|c__Gammaproteobacteria|o__Pseudomonadales|f__Moraxellaceae|g__Acinetobacter|s__Acinetobacter_wuhouensis	0	0	0	0	0	0	0	0	0	0	0	0	0	0	0	0	0.033	2.906
k__Bacteria|p__Bacteroidetes|c__Flavobacteriia|o__Flavobacteriales|f__Flavobacteriaceae|g__Empedobacter|s__Empedobacter_falsenii	0	0	0	0	0	0	0	0	0	0	0	0	0	0	0	0	0.05	0.367
k__Bacteria|p__Proteobacteria|c__Betaproteobacteria|o__Burkholderiales|f__Comamonadaceae|g__Ottowia|s__Ottowia_oryzae	0	0	0	0	0	0	0	0	0	0	0	0	0	0	0	0	0.033	0.743
k__Bacteria|p__Actinobacteria|c__Actinobacteria|o__Bifidobacteriales|f__Bifidobacteriaceae|g__Bifidobacterium|s__Bifidobacterium_minimum	0	0	0	0	0	0	0	0	0	0	0	0	0	0	0	0	0.033	0.292
k__Bacteria|p__Firmicutes|c__Negativicutes|o__Veillonellales|f__Veillonellaceae|g__Megasphaera|s__Megasphaera_cerevisiae	0	0	0	0	0	0	0	0	0	0	0	0	0	0	0	0	0.033	0.347
k__Bacteria|p__Firmicutes|c__Bacilli|o__Lactobacillales|f__Lactobacillaceae|g__Lactobacillus|s__Lactobacillus_harbinensis	0	0	0	0	0	0	0	0	0	0	0	0	0	0	0	0	0.025	3.982
k__Bacteria|p__Proteobacteria|c__Gammaproteobacteria|o__Pseudomonadales|f__Moraxellaceae|g__Acinetobacter|s__Acinetobacter_sp_WCHAc010034	0	0	0	0	0	0	0	0	0	0	0	0	0	0	0.007	0.014	0.017	0.158
k__Bacteria|p__Proteobacteria|c__Betaproteobacteria|o__Neisseriales|f__Neisseriaceae|g__Neisseria|s__Neisseria_arctica	0	0	0	0	0	0	0	0	0	0	0	0	0	0	0	0	0.017	0.125
k__Bacteria|p__Proteobacteria|c__Gammaproteobacteria|o__Pseudomonadales|f__Moraxellaceae|g__Acinetobacter|s__Acinetobacter_sp_WCHAc060041	0	0	0	0	0	0	0	0	0	0	0	0	0	0	0	0	0.033	0.138
k__Bacteria|p__Bacteroidetes|c__Flavobacteriia|o__Flavobacteriales|f__Flavobacteriaceae|g__Chryseobacterium|s__Chryseobacterium_hominis	0	0	0	0	0	0	0	0	0	0	0	0	0	0	0	0	0.025	0.102
k__Bacteria|p__Proteobacteria|c__Gammaproteobacteria|o__Pseudomonadales|f__Moraxellaceae|g__Acinetobacter|s__Acinetobacter_sp_ANC_4218	0	0	0	0	0	0	0	0	0	0	0	0	0	0	0	0	0.025	0.063
k__Bacteria|p__Proteobacteria|c__Betaproteobacteria|o__Rhodocyclales|f__Zoogloeaceae|g__Thauera|s__Thauera_terpenica	0	0	0	0	0	0	0	0	0	0	0	0	0	0	0	0	0.008	0.12
k__Bacteria|p__Proteobacteria|c__Betaproteobacteria|o__Rhodocyclales|f__Zoogloeaceae|g__Thauera|s__Thauera_phenylacetica	0	0	0	0	0	0	0	0	0	0	0	0	0	0	0	0	0.008	0.086
k__Bacteria|p__Bacteroidetes|c__Flavobacteriia|o__Flavobacteriales|f__Flavobacteriaceae|g__Chryseobacterium|s__Chryseobacterium_hispanicum	0	0	0	0	0	0	0	0	0	0	0	0	0	0	0	0	0.025	0.083
k__Bacteria|p__Proteobacteria|c__Betaproteobacteria|o__Burkholderiales|f__Comamonadaceae|g__Acidovorax|s__Acidovorax_temperans	0	0	0	0	0	0	0	0	0	0	0	0	0	0	0	0	0.025	0.031
k__Bacteria|p__Proteobacteria|c__Gammaproteobacteria|o__Pseudomonadales|f__Moraxellaceae|g__Acinetobacter|s__Acinetobacter_defluvii	0	0	0	0	0	0	0	0	0	0	0	0	0	0	0	0	0.025	0.098
k__Bacteria|p__Proteobacteria|c__Betaproteobacteria|o__Burkholderiales|f__Comamonadaceae|g__Comamonas|s__Comamonas_aquatica	0	0	0	0	0	0	0	0	0	0	0	0	0	0	0	0	0.05	0.276
k__Bacteria|p__Bacteroidetes|c__Bacteroidia|o__Bacteroidales|f__Dysgonamonadaceae|g__Dysgonomonas|s__Dysgonomonas_sp_37_18	0	0	0	0	0	0	0	0	0	0	0	0	0	0	0	0	0.025	0.015
k__Bacteria|p__Proteobacteria|c__Alphaproteobacteria|o__Rhodospirillales|f__Acetobacteraceae|g__Gluconacetobacter|s__Gluconacetobacter_liquefaciens	0	0	0	0	0	0	0	0	0	0	0	0	0	0	0	0	0.017	0.108
k__Bacteria|p__Proteobacteria|c__Betaproteobacteria|o__Burkholderiales|f__Comamonadaceae|g__Comamonas|s__Comamonas_testosteroni	0	0	0	0	0	0	0	0	0	0	0	0	0	0	0	0	0.041	0.031
k__Bacteria|p__Firmicutes|c__Negativicutes|o__Veillonellales|f__Veillonellaceae|g__Megasphaera|s__Megasphaera_paucivorans	0	0	0	0	0	0	0	0	0	0	0	0	0	0	0	0	0.025	0.027
k__Bacteria|p__Proteobacteria|c__Betaproteobacteria|o__Burkholderiales|f__Comamonadaceae|g__Acidovorax|s__Acidovorax_caeni	0	0	0	0	0	0	0	0	0	0	0	0	0	0	0	0	0.017	0.015
k__Bacteria|p__Proteobacteria|c__Betaproteobacteria|o__Burkholderiales|f__Comamonadaceae|g__Acidovorax|s__Acidovorax_sp_MR_S7	0	0	0	0	0	0	0	0	0	0	0	0	0	0	0	0	0.017	0.027
k__Bacteria|p__Firmicutes|c__Bacilli|o__Lactobacillales|f__Streptococcaceae|g__Lactococcus|s__Lactococcus_chungangensis	0	0	0	0	0	0	0	0	0	0	0	0	0	0	0	0	0.025	0.009
k__Bacteria|p__Proteobacteria|c__Gammaproteobacteria|o__Pseudomonadales|f__Pseudomonadaceae|g__Pseudomonas|s__Pseudomonas_guangdongensis	0	0	0	0	0	0	0	0	0	0	0	0	0	0	0	0	0.017	0.064
k__Bacteria|p__Bacteroidetes|c__Sphingobacteriia|o__Sphingobacteriales|f__Sphingobacteriaceae|g__Sphingobacterium|s__Sphingobacterium_multivorum	0	0	0	0	0	0	0	0	0	0	0	0	0	0	0	0	0.025	0.102
k__Bacteria|p__Proteobacteria|c__Betaproteobacteria|o__Burkholderiales|f__Comamonadaceae|g__Comamonas|s__Comamonas_sp_SCN_65_56	0	0	0	0	0	0	0	0	0	0	0	0	0	0	0	0	0.008	0.004
k__Bacteria|p__Proteobacteria|c__Alphaproteobacteria|o__Rhodospirillales|f__Acetobacteraceae|g__Acetobacter|s__Acetobacter_indonesiensis	0	0	0	0	0	0	0	0	0	0	0	0	0	0	0	0	0.025	0.27
k__Eukaryota|p__Ascomycota|c__Saccharomycetes|o__Saccharomycetales|f__Debaryomycetaceae|g__Candida|s__Candida_tropicalis	0.007	0.011	0	0	0	0	0	0	0	0	0	0	0	0	0	0	0.017	0.173
k__Bacteria|p__Proteobacteria|c__Alphaproteobacteria|o__Rhizobiales|f__Rhizobiaceae|g__Rhizobium|s__Rhizobium_pusense	0	0	0	0	0	0	0	0	0	0	0	0	0	0	0.064	2.443	0.008	0.089
k__Bacteria|p__Proteobacteria|c__Alphaproteobacteria|o__Rhodobacterales|f__Rhodobacteraceae|g__Rhodobacter|s__Rhodobacter_sphaeroides	0	0	0	0	0	0	0	0	0	0	0	0	0	0	0	0	0.017	0.11
k__Bacteria|p__Actinobacteria|c__Actinobacteria|o__Bifidobacteriales|f__Bifidobacteriaceae|g__Bifidobacterium|s__Bifidobacterium_subtile	0	0	0	0	0	0	0	0	0	0	0	0	0	0	0	0	0.025	0.067
k__Bacteria|p__Proteobacteria|c__Alphaproteobacteria|o__Rhodobacterales|f__Rhodobacteraceae|g__Paracoccus|s__Paracoccus_yeei	0	0	0	0	0	0	0	0	0	0	0	0	0	0	0	0	0.008	0.065
k__Bacteria|p__Proteobacteria|c__Betaproteobacteria|o__Burkholderiales|f__Comamonadaceae|g__Hydrogenophaga|s__Hydrogenophaga_sp_H7	0	0	0	0	0	0	0	0	0	0	0	0	0	0	0	0	0.017	0.183
k__Bacteria|p__Actinobacteria|c__Actinobacteria|o__Micrococcales|f__Microbacteriaceae|g__Microbacterium|s__Microbacterium_sorbitolivorans	0	0	0	0	0	0	0	0	0	0	0	0	0	0	0	0	0.008	0.04
k__Bacteria|p__Proteobacteria|c__Alphaproteobacteria|o__Rhizobiales|f__Brucellaceae|g__Ochrobactrum|s__Ochrobactrum_haematophilum	0	0	0	0	0	0	0	0	0	0	0	0	0	0	0	0	0.008	0.037
k__Bacteria|p__Proteobacteria|c__Alphaproteobacteria|o__Rhizobiales|f__Brucellaceae|g__Ochrobactrum|s__Ochrobactrum_anthropi	0	0	0	0	0	0	0	0	0	0	0	0	0	0	0	0	0.008	0.036
k__Bacteria|p__Proteobacteria|c__Alphaproteobacteria|o__Sphingomonadales|f__Sphingomonadaceae|g__Sphingobium|s__Sphingobium_yanoikuyae	0	0	0	0	0	0	0	0	0	0	0	0	0	0	0	0	0.008	0.026
k__Bacteria|p__Firmicutes|c__Bacilli|o__Lactobacillales|f__Streptococcaceae|g__Lactococcus|s__Lactococcus_fujiensis	0	0	0	0	0	0	0	0	0	0	0	0	0	0	0	0	0.017	0.039
k__Bacteria|p__Bacteroidetes|c__Flavobacteriia|o__Flavobacteriales|f__Flavobacteriaceae|g__Flavobacterium|s__Flavobacterium_cucumis	0	0	0	0	0	0	0	0	0	0	0	0	0	0	0	0	0.017	0.056
k__Bacteria|p__Actinobacteria|c__Actinobacteria|o__Micrococcales|f__Micrococcaceae|g__Arthrobacter|s__Arthrobacter_sp_EpRS66	0	0	0	0	0	0	0	0	0	0	0	0	0	0	0	0	0.017	0.012
k__Bacteria|p__Firmicutes|c__Bacilli|o__Lactobacillales|f__Enterococcaceae|g__Bavariicoccus|s__Bavariicoccus_seileri	0	0	0	0	0	0	0	0	0	0	0	0	0	0	0	0	0.033	0.009
k__Bacteria|p__Proteobacteria|c__Betaproteobacteria|o__Burkholderiales|f__Comamonadaceae|g__Comamonas|s__Comamonas_terrigena	0	0	0	0	0	0	0	0	0	0	0	0	0	0	0	0	0.025	0.011
k__Bacteria|p__Actinobacteria|c__Actinobacteria|o__Micrococcales|f__Micrococcaceae|g__Glutamicibacter|s__Glutamicibacter_soli	0	0	0	0	0	0	0	0	0	0	0	0	0	0	0	0	0.017	0.033
k__Bacteria|p__Actinobacteria|c__Actinobacteria|o__Micrococcales|f__Micrococcaceae|g__Arthrobacter|s__Arthrobacter_sp_NIO_1057	0	0	0	0	0	0	0	0	0	0	0	0	0	0	0	0	0.017	0.007
k__Bacteria|p__Firmicutes|c__Bacilli|o__Lactobacillales|f__Lactobacillaceae|g__Lactobacillus|s__Lactobacillus_dextrinicus	0	0	0	0	0	0	0	0	0	0	0	0	0	0	0	0	0.008	0.006
k__Bacteria|p__Actinobacteria|c__Actinobacteria|o__Micrococcales|f__Micrococcaceae|g__Rothia|s__Rothia_sp	0	0	0	0	0	0	0	0	0	0	0	0	0	0	0	0	0.017	0.013
k__Bacteria|p__Firmicutes|c__Bacilli|o__Lactobacillales|f__Lactobacillaceae|g__Lactobacillus|s__Lactobacillus_amylotrophicus	0	0	0	0	0	0	0	0	0	0	0	0	0	0	0	0	0.008	0.003
k__Bacteria|p__Actinobacteria|c__Actinobacteria|o__Micrococcales|f__Microbacteriaceae|g__Microbacterium|s__Microbacterium_aurum	0	0	0	0	0	0	0	0	0	0	0	0	0	0	0	0	0.008	0.003
k__Bacteria|p__Actinobacteria|c__Actinobacteria|o__Micrococcales|f__Intrasporangiaceae|g__Janibacter|s__Janibacter_melonis	0	0	0	0	0	0	0	0	0	0	0	0	0	0	0	0	0.008	0.009
k__Bacteria|p__Tenericutes|c__Mollicutes|o__Mycoplasmatales|f__Mycoplasmataceae|g__Mycoplasma|s__Mycoplasma_pullorum	0	0	0	0	0	0	0	0	0	0	0	0	0	0	0	0	0.008	0.004
k__Bacteria|p__Firmicutes|c__Bacilli|o__Lactobacillales|f__Lactobacillaceae|g__Lactobacillus|s__Lactobacillus_sharpeae	0	0	0	0	0	0	0	0	0	0	0	0	0	0	0	0	0.008	0.009
k__Bacteria|p__Actinobacteria|c__Actinobacteria|o__Propionibacteriales|f__Propionibacteriaceae|g__Tessaracoccus|s__Tessaracoccus_lapidicaptus	0	0	0	0	0	0	0	0	0	0	0	0	0	0	0	0	0.008	0.049
k__Bacteria|p__Proteobacteria|c__Gammaproteobacteria|o__Pseudomonadales|f__Moraxellaceae|g__Acinetobacter|s__Acinetobacter_idrijaensis	0	0	0	0	0	0	0	0	0	0	0	0	0	0	0	0	0.008	0.028
k__Bacteria|p__Proteobacteria|c__Betaproteobacteria|o__Burkholderiales|f__Comamonadaceae|g__Comamonas|s__Comamonas_thiooxydans	0	0	0	0	0	0	0	0	0	0	0	0	0	0	0	0	0.017	0.018
k__Bacteria|p__Proteobacteria|c__Alphaproteobacteria|o__Rhizobiales|f__Bradyrhizobiaceae|g__Bosea|s__Bosea_thiooxidans	0	0	0	0	0	0	0	0	0	0	0	0	0	0	0	0	0.008	0.011
k__Bacteria|p__Proteobacteria|c__Alphaproteobacteria|o__Rhizobiales|f__Rhizobiaceae|g__Sinorhizobium|s__Sinorhizobium_fredii	0	0	0	0	0	0	0	0	0	0	0	0	0	0	0	0	0.008	0.003
k__Bacteria|p__Firmicutes|c__Bacilli|o__Lactobacillales|f__Lactobacillaceae|g__Lactobacillus|s__Lactobacillus_pasteurii	0	0	0	0	0	0	0	0	0	0	0	0	0	0	0	0	0.017	0.013
k__Bacteria|p__Firmicutes|c__Bacilli|o__Bacillales|f__Staphylococcaceae|g__Staphylococcus|s__Staphylococcus_sciuri	0	0	0	0	0	0	0	0	0	0	0	0	0	0	0.014	0.057	0.033	0.011
k__Bacteria|p__Chlamydiae|c__Chlamydiia|o__Chlamydiales|f__Chlamydiaceae|g__Chlamydia|s__Chlamydia_psittaci	0	0	0	0	0	0	0	0	0	0	0	0	0	0	0	0	0.008	0.285
k__Bacteria|p__Proteobacteria|c__Betaproteobacteria|o__Burkholderiales|f__Comamonadaceae|g__Delftia|s__Delftia_acidovorans	0	0	0	0	0	0	0	0	0	0	0	0	0	0	0.007	0.074	0.008	0.135
k__Bacteria|p__Proteobacteria|c__Betaproteobacteria|o__Burkholderiales|f__Comamonadaceae|g__Delftia|s__Delftia_tsuruhatensis	0	0	0	0	0	0	0	0	0	0	0	0	0	0	0	0	0.008	0.086
k__Bacteria|p__Actinobacteria|c__Actinobacteria|o__Corynebacteriales|f__Corynebacteriaceae|g__Corynebacterium|s__Corynebacterium_testudinoris	0	0	0	0	0	0	0	0	0	0	0	0	0	0	0	0	0.008	0.063
k__Bacteria|p__Proteobacteria|c__Betaproteobacteria|o__Burkholderiales|f__Comamonadaceae|g__Brachymonas|s__Brachymonas_denitrificans	0	0	0	0	0	0	0	0	0	0	0	0	0	0	0	0	0.008	0.059
k__Bacteria|p__Actinobacteria|c__Actinobacteria|o__Micrococcales|f__Microbacteriaceae|g__Microbacterium|s__Microbacterium_laevaniformans	0	0	0	0	0	0	0	0	0	0	0	0	0	0	0	0	0.008	0.048
k__Bacteria|p__Tenericutes|c__Mollicutes|o__Mycoplasmatales|f__Mycoplasmataceae|g__Mycoplasma|s__Mycoplasma_anatis	0	0	0	0	0	0	0	0	0	0	0	0	0	0	0	0	0.008	0.043
k__Bacteria|p__Proteobacteria|c__Gammaproteobacteria|o__Xanthomonadales|f__Xanthomonadaceae|g__Stenotrophomonas|s__Stenotrophomonas_acidaminiphila	0	0	0	0	0	0	0	0	0	0	0	0	0	0	0	0	0.008	0.039
k__Bacteria|p__Proteobacteria|c__Betaproteobacteria|o__Betaproteobacteria_unclassified|f__Betaproteobacteria_unclassified|g__Candidatus_Accumulibacter|s__Candidatus_Accumulibacter_sp_66_26	0	0	0	0	0	0	0	0	0	0	0	0	0	0	0	0	0.008	0.039
k__Bacteria|p__Actinobacteria|c__Actinobacteria|o__Micrococcales|f__Dermabacteraceae|g__Brachybacterium|s__Brachybacterium_nesterenkovii	0	0	0	0	0	0	0	0	0	0	0	0	0	0	0	0	0.008	0.022
k__Bacteria|p__Actinobacteria|c__Actinobacteria|o__Corynebacteriales|f__Corynebacteriaceae|g__Corynebacterium|s__Corynebacterium_callunae	0	0	0	0	0	0	0	0	0	0	0	0	0	0	0	0	0.017	0.026
k__Bacteria|p__Proteobacteria|c__Betaproteobacteria|o__Burkholderiales|f__Comamonadaceae|g__Oryzisolibacter|s__Oryzisolibacter_propanilivorax	0	0	0	0	0	0	0	0	0	0	0	0	0	0	0	0	0.008	0.019
k__Bacteria|p__Proteobacteria|c__Betaproteobacteria|o__Burkholderiales|f__Comamonadaceae|g__Acidovorax|s__Acidovorax_ebreus	0	0	0	0	0	0	0	0	0	0	0	0	0	0	0	0	0.008	0.018
k__Bacteria|p__Proteobacteria|c__Betaproteobacteria|o__Burkholderiales|f__Oxalobacteraceae|g__Herbaspirillum|s__Herbaspirillum_frisingense	0	0	0	0	0	0	0	0	0	0	0	0	0	0	0	0	0.008	0.016
k__Bacteria|p__Proteobacteria|c__Betaproteobacteria|o__Neisseriales|f__Neisseriaceae|g__Rivicola|s__Rivicola_pingtungensis	0	0	0	0	0	0	0	0	0	0	0	0	0	0	0	0	0.008	0.008
k__Bacteria|p__Proteobacteria|c__Gammaproteobacteria|o__Pasteurellales|f__Pasteurellaceae|g__Pasteurella|s__Pasteurella_langaaensis	0	0	0	0	0	0	0	0	0	0	0	0	0	0	0	0	0.008	0.006
k__Bacteria|p__Bacteroidetes|c__Sphingobacteriia|o__Sphingobacteriales|f__Sphingobacteriaceae|g__Sphingobacterium|s__Sphingobacterium_sp_B29	0	0	0	0	0	0	0	0	0	0	0	0	0	0	0	0	0.017	0.002
k__Bacteria|p__Proteobacteria|c__Alphaproteobacteria|o__Rhodospirillales|f__Acetobacteraceae|g__Acetobacter|s__Acetobacter_fabarum	0	0	0	0	0	0	0	0	0	0	0	0	0	0	0	0	0.017	0.025
k__Bacteria|p__Firmicutes|c__Bacilli|o__Bacillales|f__Bacillaceae|g__Lysinibacillus|s__Lysinibacillus_sp_BF_4	0	0	0	0	0	0	0	0	0	0	0	0	0	0	0	0	0.025	0.041
k__Eukaryota|p__Apicomplexa|c__Conoidasida|o__Eucoccidiorida|f__Cryptosporidiidae|g__Cryptosporidium|s__Cryptosporidium_meleagridis	0	0	0	0	0	0	0	0	0	0	0	0	0	0	0	0	0.025	0.062
k__Bacteria|p__Proteobacteria|c__Betaproteobacteria|o__Burkholderiales|f__Alcaligenaceae|g__Paenalcaligenes|s__Paenalcaligenes_hominis	0	0	0	0	0	0	0	0	0	0	0	0	0	0	0	0	0.025	0.152
k__Bacteria|p__Firmicutes|c__Bacilli|o__Lactobacillales|f__Enterococcaceae|g__Enterococcus|s__Enterococcus_pseudoavium	0	0	0	0	0	0	0	0	0	0	0	0	0	0	0	0	0.008	0.047
k__Bacteria|p__Firmicutes|c__Bacilli|o__Lactobacillales|f__Carnobacteriaceae|g__Pisciglobus|s__Pisciglobus_halotolerans	0	0	0	0	0	0	0	0	0	0	0	0	0	0	0	0	0.041	0.021
k__Eukaryota|p__Apicomplexa|c__Conoidasida|o__Eucoccidiorida|f__Cryptosporidiidae|g__Cryptosporidium|s__Cryptosporidium_parvum	0	0	0	0	0	0	0	0	0	0	0	0	0	0	0	0	0.008	0.003
k__Bacteria|p__Proteobacteria|c__Gammaproteobacteria|o__Pseudomonadales|f__Moraxellaceae|g__Acinetobacter|s__Acinetobacter_indicus	0	0	0	0	0	0	0	0	0	0	0	0	0	0	0	0	0.017	0.094
k__Bacteria|p__Proteobacteria|c__Gammaproteobacteria|o__Pseudomonadales|f__Pseudomonadaceae|g__Oblitimonas|s__Oblitimonas_alkaliphila	0	0	0	0	0	0	0	0	0	0	0	0	0	0	0	0	0.008	0.034
k__Bacteria|p__Firmicutes|c__Bacilli|o__Bacillales|f__Bacillaceae|g__Bacillus|s__Bacillus_kochii	0	0	0	0	0	0	0	0	0	0	0	0	0	0	0	0	0.008	0.028
k__Bacteria|p__Actinobacteria|c__Actinobacteria|o__Micrococcales|f__Micrococcaceae|g__Kocuria|s__Kocuria_rhizophila	0	0	0	0	0	0	0	0	0	0	0	0	0	0	0	0	0.008	0.018
k__Bacteria|p__Firmicutes|c__Bacilli|o__Bacillales|f__Planococcaceae|g__Caryophanon|s__Caryophanon_tenue	0	0	0	0	0	0	0	0	0	0	0	0	0	0	0	0	0.008	0.011
k__Bacteria|p__Actinobacteria|c__Actinobacteria|o__Micrococcales|f__Intrasporangiaceae|g__Tetrasphaera|s__Tetrasphaera_elongata	0	0	0	0	0	0	0	0	0	0	0	0	0	0	0	0	0.008	0.006
k__Bacteria|p__Actinobacteria|c__Actinobacteria|o__Micrococcales|f__Micrococcaceae|g__Kocuria|s__Kocuria_marina	0	0	0	0	0	0	0	0	0	0	0	0	0	0	0	0	0.008	0.006
k__Bacteria|p__Actinobacteria|c__Actinobacteria|o__Bifidobacteriales|f__Bifidobacteriaceae|g__Bifidobacterium|s__Bifidobacterium_choerinum	0	0	0	0	0	0	0	0	0	0	0	0	0	0	0	0	0.008	0.006
k__Bacteria|p__Proteobacteria|c__Gammaproteobacteria|o__Gammaproteobacteria_unclassified|f__Gammaproteobacteria_unclassified|g__Wohlfahrtiimonas|s__Wohlfahrtiimonas_chitiniclastica	0	0	0	0	0	0	0	0	0	0	0	0	0	0	0	0	0.008	0.006
k__Bacteria|p__Proteobacteria|c__Gammaproteobacteria|o__Gammaproteobacteria_unclassified|f__Gammaproteobacteria_unclassified|g__Wohlfahrtiimonas|s__Wohlfahrtiimonas_sp_G9077	0	0	0	0	0	0	0	0	0	0	0	0	0	0	0	0	0.008	0.006
k__Bacteria|p__Firmicutes|c__Bacilli|o__Lactobacillales|f__Aerococcaceae|g__Globicatella|s__Globicatella_sanguinis	0	0	0	0	0	0	0	0	0	0	0	0	0	0	0	0	0.008	0.005
k__Bacteria|p__Proteobacteria|c__Gammaproteobacteria|o__Pseudomonadales|f__Moraxellaceae|g__Psychrobacter|s__Psychrobacter_phenylpyruvicus	0	0	0	0	0	0	0	0	0	0	0	0	0	0	0	0	0.008	0.001
k__Bacteria|p__Firmicutes|c__Bacilli|o__Lactobacillales|f__Lactobacillaceae|g__Lactobacillus|s__Lactobacillus_pantheris	0	0	0	0	0	0	0	0	0	0	0	0	0	0	0	0	0.017	0.231
k__Bacteria|p__Firmicutes|c__Bacilli|o__Lactobacillales|f__Lactobacillaceae|g__Lactobacillus|s__Lactobacillus_vaccinostercus	0	0	0	0	0	0	0	0	0	0	0	0	0	0	0	0	0.025	0.191
k__Bacteria|p__Proteobacteria|c__Alphaproteobacteria|o__Rhodospirillales|f__Acetobacteraceae|g__Acetobacter|s__Acetobacter_cibinongensis	0	0	0	0	0	0	0	0	0	0	0	0	0	0	0	0	0.008	0.275
k__Bacteria|p__Proteobacteria|c__Gammaproteobacteria|o__Pseudomonadales|f__Moraxellaceae|g__Acinetobacter|s__Acinetobacter_soli	0	0	0	0	0	0	0	0	0	0	0	0	0	0	0	0	0.008	0.019
k__Bacteria|p__Proteobacteria|c__Betaproteobacteria|o__Burkholderiales|f__Alcaligenaceae|g__Oligella|s__Oligella_ureolytica	0	0	0	0	0	0	0	0	0	0	0	0	0	0	0	0	0.008	0.009
k__Bacteria|p__Proteobacteria|c__Gammaproteobacteria|o__Xanthomonadales|f__Xanthomonadaceae|g__Xanthomonadaceae_unclassified|s__Pseudomonas_geniculata	0	0	0	0	0	0	0	0	0	0	0	0	0	0	0	0	0.008	0.008
k__Bacteria|p__Proteobacteria|c__Betaproteobacteria|o__Burkholderiales|f__Comamonadaceae|g__Lampropedia|s__Lampropedia_hyalina	0	0	0	0	0	0	0	0	0	0	0	0	0	0	0	0	0.008	0.665
k__Bacteria|p__Firmicutes|c__Bacilli|o__Lactobacillales|f__Lactobacillaceae|g__Lactobacillus|s__Lactobacillus_perolens	0	0	0	0	0	0	0	0	0	0	0	0	0	0	0	0	0.008	0.475
k__Bacteria|p__Firmicutes|c__Bacilli|o__Lactobacillales|f__Enterococcaceae|g__Enterococcus|s__Enterococcus_saccharolyticus	0	0	0	0	0	0	0	0	0	0	0	0	0	0	0.007	0.027	0.008	0.089
k__Bacteria|p__Proteobacteria|c__Alphaproteobacteria|o__Rhodospirillales|f__Acetobacteraceae|g__Acetobacter|s__Acetobacter_okinawensis	0	0	0	0	0	0	0	0	0	0	0	0	0	0	0	0	0.008	0.041
k__Bacteria|p__Proteobacteria|c__Alphaproteobacteria|o__Rhizobiales|f__Phyllobacteriaceae|g__Aquamicrobium|s__Aquamicrobium_aerolatum	0	0	0	0	0	0	0	0	0	0	0	0	0	0	0	0	0.008	0.029
k__Bacteria|p__Proteobacteria|c__Epsilonproteobacteria|o__Campylobacterales|f__Campylobacteraceae|g__Arcobacter|s__Arcobacter_skirrowii	0	0	0	0	0	0	0	0	0	0	0	0	0	0	0	0	0.008	0.022
k__Bacteria|p__Firmicutes|c__Clostridia|o__Clostridiales|f__Lachnospiraceae|g__Anaerosporobacter|s__Anaerosporobacter_mobilis	0	0	0	0	0	0	0	0	0	0	0	0	0	0	0	0	0.008	0.015
k__Bacteria|p__Bacteroidetes|c__Flavobacteriia|o__Flavobacteriia_unclassified|f__Flavobacteriia_unclassified|g__Flavobacteriia_unclassified|s__Flavobacteriia_bacterium_40_80	0	0	0	0	0	0	0	0	0	0	0	0	0	0	0	0	0.008	0.01
k__Bacteria|p__Proteobacteria|c__Alphaproteobacteria|o__Rhodobacterales|f__Rhodobacteraceae|g__Paenirhodobacter|s__Paenirhodobacter_enshiensis	0	0	0	0	0	0	0	0	0	0	0	0	0	0	0	0	0.008	0.009
k__Bacteria|p__Proteobacteria|c__Gammaproteobacteria|o__Pseudomonadales|f__Moraxellaceae|g__Acinetobacter|s__Acinetobacter_bouvetii	0	0	0	0	0	0	0	0	0	0	0	0	0	0	0	0	0.008	0.008
k__Bacteria|p__Firmicutes|c__Bacilli|o__Lactobacillales|f__Lactobacillaceae|g__Lactobacillus|s__Lactobacillus_composti	0	0	0	0	0	0	0	0	0	0	0	0	0	0	0	0	0.008	0.008
k__Bacteria|p__Proteobacteria|c__Gammaproteobacteria|o__Xanthomonadales|f__Xanthomonadaceae|g__Stenotrophomonas|s__Stenotrophomonas_nitritireducens	0	0	0	0	0	0	0	0	0	0	0	0	0	0	0	0	0.008	0.008
k__Bacteria|p__Actinobacteria|c__Actinobacteria|o__Micrococcales|f__Micrococcaceae|g__Kocuria|s__Kocuria_varians	0	0	0	0	0	0	0	0	0	0	0	0	0	0	0	0	0.008	0.005
k__Bacteria|p__Firmicutes|c__Clostridia|o__Clostridiales|f__Lachnospiraceae|g__Lachnoclostridium|s__Lachnoclostridium_sp_An169	0	0	0	0	0	0	0	0	0	0	0	0	0	0	0	0	0.017	0.019
k__Bacteria|p__Firmicutes|c__Bacilli|o__Lactobacillales|f__Streptococcaceae|g__Streptococcus|s__Streptococcus_ferus	0	0	0	0	0	0	0	0	0	0	0	0	0	0	0	0	0.008	0.377
k__Bacteria|p__Actinobacteria|c__Actinobacteria|o__Micrococcales|f__Brevibacteriaceae|g__Brevibacterium|s__Brevibacterium_aurantiacum	0	0	0	0	0	0	0	0	0	0	0	0	0	0	0	0	0.008	0.102
k__Bacteria|p__Actinobacteria|c__Actinobacteria|o__Micrococcales|f__Brevibacteriaceae|g__Brevibacterium|s__Brevibacterium_linens	0	0	0	0	0	0	0	0	0	0	0	0	0	0	0	0	0.008	0.1
k__Bacteria|p__Actinobacteria|c__Actinobacteria|o__Bifidobacteriales|f__Bifidobacteriaceae|g__Bifidobacterium|s__Bifidobacterium_thermacidophilum	0	0	0	0	0	0	0	0	0	0	0	0	0	0	0	0	0.008	0.589
k__Bacteria|p__Actinobacteria|c__Actinobacteria|o__Bifidobacteriales|f__Bifidobacteriaceae|g__Bifidobacterium|s__Bifidobacterium_thermophilum	0	0	0	0	0	0	0	0	0	0	0	0	0	0	0	0	0.008	0.051
k__Bacteria|p__Actinobacteria|c__Actinobacteria|o__Bifidobacteriales|f__Bifidobacteriaceae|g__Bifidobacterium|s__Bifidobacterium_ruminantium	0	0	0	0	0	0	0	0	0	0	0	0	0	0	0	0	0.008	0.05
k__Bacteria|p__Synergistetes|c__Synergistia|o__Synergistales|f__Synergistaceae|g__Cloacibacillus|s__Cloacibacillus_sp_An23	0	0	0	0	0	0	0	0	0	0	0	0	0	0	0	0	0.008	0.03
k__Bacteria|p__Actinobacteria|c__Actinobacteria|o__Micrococcales|f__Micrococcaceae|g__Glutamicibacter|s__Glutamicibacter_arilaitensis	0	0	0	0	0	0	0	0	0	0	0	0	0	0	0	0	0.008	0.026
k__Bacteria|p__Firmicutes|c__Bacilli|o__Lactobacillales|f__Lactobacillaceae|g__Lactobacillus|s__Lactobacillus_intestinalis	0	0	0	0	0	0	0	0	0	0	0	0	0	0	0.092	0.971	0.008	0.039
k__Bacteria|p__Actinobacteria|c__Actinobacteria|o__Micrococcales|f__Brevibacteriaceae|g__Brevibacterium|s__Brevibacterium_iodinum	0	0	0	0	0	0	0	0	0	0	0	0	0	0	0	0	0.008	0.128
k__Bacteria|p__Firmicutes|c__Bacilli|o__Bacillales|f__Planococcaceae|g__Kurthia|s__Kurthia_zopfii	0	0	0	0	0	0	0	0	0	0	0	0	0	0	0	0	0.008	0.026
k__Bacteria|p__Firmicutes|c__Bacilli|o__Bacillales|f__Staphylococcaceae|g__Jeotgalicoccus|s__Jeotgalicoccus_sp	0	0	0	0	0	0	0	0	0	0	0	0	0	0	0	0	0.008	0.02
k__Bacteria|p__Actinobacteria|c__Actinobacteria|o__Micrococcales|f__Brevibacteriaceae|g__Brevibacterium|s__Brevibacterium_siliguriense	0	0	0	0	0	0	0	0	0	0	0	0	0	0	0	0	0.008	0.015
k__Bacteria|p__Bacteroidetes|c__Flavobacteriia|o__Flavobacteriales|f__Flavobacteriaceae|g__Myroides|s__Myroides_guanonis	0	0	0	0	0	0	0	0	0	0	0	0	0	0	0	0	0.008	0.004
k__Bacteria|p__Actinobacteria|c__Actinobacteria|o__Actinomycetales|f__Actinomycetaceae|g__Actinomyces|s__Actinomyces_radicidentis	0	0	0	0	0	0	0	0	0	0	0	0	0	0	0	0	0.008	0.002
k__Bacteria|p__Firmicutes|c__Bacilli|o__Lactobacillales|f__Lactobacillaceae|g__Lactobacillus|s__Lactobacillus_paraplantarum	0	0	0	0	0	0	0	0	0	0	0	0	0	0	0	0	0.008	0.016
k__Bacteria|p__Firmicutes|c__Bacilli|o__Lactobacillales|f__Lactobacillaceae|g__Pediococcus|s__Pediococcus_sp	0	0	0	0	0	0	0	0	0	0	0	0	0	0	0	0	0.008	0.016
k__Bacteria|p__Firmicutes|c__Bacilli|o__Lactobacillales|f__Lactobacillaceae|g__Lactobacillus|s__Lactobacillus_crustorum	0	0	0	0	0	0	0	0	0	0	0	0	0	0	0	0	0.008	0.015
k__Bacteria|p__Firmicutes|c__Bacilli|o__Lactobacillales|f__Lactobacillaceae|g__Lactobacillus|s__Lactobacillus_hokkaidonensis	0	0	0	0	0	0	0	0	0	0	0	0	0	0	0	0	0.008	0.006
k__Bacteria|p__Firmicutes|c__Bacilli|o__Lactobacillales|f__Lactobacillaceae|g__Pediococcus|s__Pediococcus_parvulus	0	0	0	0	0	0	0	0	0	0	0	0	0	0	0	0	0.008	0.003
k__Bacteria|p__Firmicutes|c__Bacilli|o__Lactobacillales|f__Lactobacillaceae|g__Lactobacillus|s__Lactobacillus_ginsenosidimutans	0	0	0	0	0	0	0	0	0	0	0	0	0	0	0	0	0.008	0.001
k__Bacteria|p__Spirochaetes|c__Spirochaetia|o__Brachyspirales|f__Brachyspiraceae|g__Brachyspira|s__Brachyspira_murdochii	0	0	0	0	0	0	0	0	0	0	0	0	0	0	0	0	0.017	0.042
k__Bacteria|p__Spirochaetes|c__Spirochaetia|o__Brachyspirales|f__Brachyspiraceae|g__Brachyspira|s__Brachyspira_sp_G79	0	0	0	0	0	0	0	0	0	0	0	0	0	0	0	0	0.008	0.012
k__Bacteria|p__Proteobacteria|c__Alphaproteobacteria|o__Sphingomonadales|f__Sphingomonadaceae|g__Sphingomonas|s__Sphingomonas_sanguinis	0	0	0	0	0	0	0	0	0	0	0	0	0	0	0	0	0.008	0.106
k__Bacteria|p__Proteobacteria|c__Alphaproteobacteria|o__Rhizobiales|f__Methylobacteriaceae|g__Methylobacterium|s__Methylobacterium_radiotolerans	0	0	0	0	0	0	0	0	0	0	0	0	0	0	0	0	0.008	0.085
k__Bacteria|p__Proteobacteria|c__Alphaproteobacteria|o__Sphingomonadales|f__Sphingomonadaceae|g__Sphingomonas|s__Sphingomonas_melonis	0	0	0	0	0	0	0	0	0	0	0	0	0	0	0	0	0.008	0.053
k__Bacteria|p__Proteobacteria|c__Betaproteobacteria|o__Burkholderiales|f__Burkholderiaceae|g__Burkholderia|s__Burkholderia_gladioli	0	0	0	0	0	0	0	0	0	0	0	0	0	0	0	0	0.008	0.031
k__Bacteria|p__Proteobacteria|c__Betaproteobacteria|o__Burkholderiales|f__Comamonadaceae|g__Acidovorax|s__Acidovorax_avenae	0	0	0	0	0	0	0	0	0	0	0	0	0	0	0	0	0.008	0.031
k__Bacteria|p__Proteobacteria|c__Alphaproteobacteria|o__Rhizobiales|f__Methylobacteriaceae|g__Methylobacterium|s__Methylobacterium_aquaticum	0	0	0	0	0	0	0	0	0	0	0	0	0	0	0	0	0.008	0.026
k__Bacteria|p__Proteobacteria|c__Gammaproteobacteria|o__Enterobacterales|f__Erwiniaceae|g__Pantoea|s__Pantoea_deleyi	0	0	0	0	0	0	0	0	0	0	0	0	0	0	0	0	0.008	0.024
k__Bacteria|p__Proteobacteria|c__Alphaproteobacteria|o__Rhizobiales|f__Aurantimonadaceae|g__Aureimonas|s__Aureimonas_ureilytica	0	0	0	0	0	0	0	0	0	0	0	0	0	0	0	0	0.008	0.02
k__Bacteria|p__Firmicutes|c__Erysipelotrichia|o__Erysipelotrichales|f__Erysipelotrichaceae|g__Faecalibaculum|s__Faecalibaculum_rodentium	0	0	0	0	0	0	0	0	0	0	0	0	0	0	0.426	19.718	0	0
k__Bacteria|p__Firmicutes|c__Clostridia|o__Clostridiales|f__Ruminococcaceae|g__Anaerotruncus|s__Anaerotruncus_sp_G3_2012	0	0	0	0	0	0	0	0	0	0	0	0	0	0	1	4.139	0	0
k__Bacteria|p__Bacteroidetes|c__Bacteroidia|o__Bacteroidales|f__Prevotellaceae|g__Prevotella|s__Prevotella_sp_MGM2	0	0	0	0	0	0	0	0	0	0	0	0	0	0	0.135	6.926	0	0
k__Bacteria|p__Firmicutes|c__Firmicutes_unclassified|o__Firmicutes_unclassified|f__Firmicutes_unclassified|g__Firmicutes_unclassified|s__Firmicutes_bacterium_ASF500	0	0	0	0	0	0	0	0	0	0	0	0	0	0	1	0.734	0	0
k__Bacteria|p__Bacteroidetes|c__Bacteroidia|o__Bacteroidales|f__Prevotellaceae|g__Prevotella|s__Prevotella_sp_MGM1	0	0	0	0	0	0	0	0	0	0	0	0	0	0	0.128	11.789	0	0
k__Bacteria|p__Bacteroidetes|c__Bacteroidia|o__Bacteroidales|f__Muribaculaceae|g__Muribaculum|s__Muribaculum_intestinale	0	0	0	0	0	0	0	0	0	0	0	0	0	0	0.199	11.28	0	0
k__Bacteria|p__Bacteroidetes|c__Bacteroidia|o__Bacteroidales|f__Muribaculaceae|g__Muribaculaceae_unclassified|s__Muribaculaceae_bacterium_DSM_103720	0	0	0	0	0	0	0	0	0	0	0	0	0	0	0.234	14.556	0	0
k__Bacteria|p__Firmicutes|c__Clostridia|o__Clostridiales|f__Lachnospiraceae|g__Lachnospiraceae_unclassified|s__Lachnospiraceae_bacterium_28_4	0	0	0	0	0	0	0	0	0	0	0	0	0	0	0.723	8.245	0	0
k__Bacteria|p__Proteobacteria|c__Gammaproteobacteria|o__Pseudomonadales|f__Pseudomonadaceae|g__Pseudomonas|s__Pseudomonas_aeruginosa_group	0	0	0	0	0	0	0	0	0	0	0	0	0	0	0.064	1.612	0	0
k__Bacteria|p__Proteobacteria|c__Gammaproteobacteria|o__Xanthomonadales|f__Xanthomonadaceae|g__Stenotrophomonas|s__Stenotrophomonas_maltophilia	0	0	0	0	0	0	0	0	0	0	0	0	0	0	0.064	1.362	0	0
k__Bacteria|p__Firmicutes|c__Clostridia|o__Clostridiales|f__Oscillospiraceae|g__Oscillibacter|s__Oscillibacter_sp_1_3	0	0	0	0	0	0	0	0	0	0	0	0	0	0	1	0.988	0	0
k__Bacteria|p__Firmicutes|c__Clostridia|o__Clostridiales|f__Ruminococcaceae|g__Acutalibacter|s__Acutalibacter_muris	0	0	0	0	0	0	0	0	0	0	0	0	0	0	0.709	0.993	0	0
k__Bacteria|p__Firmicutes|c__Clostridia|o__Clostridiales|f__Clostridiaceae|g__Clostridium|s__Clostridium_sp_ASF502	0	0	0	0	0	0	0	0	0	0	0	0	0	0	0.908	0.877	0	0
k__Bacteria|p__Proteobacteria|c__Epsilonproteobacteria|o__Campylobacterales|f__Helicobacteraceae|g__Helicobacter|s__Helicobacter_ganmani	0	0	0	0	0	0	0	0	0	0	0	0	0	0	0.064	1.25	0	0
k__Bacteria|p__Firmicutes|c__Clostridia|o__Clostridiales|f__Lachnospiraceae|g__Dorea|s__Dorea_sp_5_2	0	0	0	0	0	0	0	0	0	0	0	0	0	0	0.943	1.157	0	0
k__Bacteria|p__Firmicutes|c__Clostridia|o__Clostridiales|f__Lachnospiraceae|g__Lachnospiraceae_unclassified|s__Lachnospiraceae_bacterium_10_1	0	0	0	0	0	0	0	0	0	0	0	0	0	0	0.312	2.444	0	0
k__Bacteria|p__Firmicutes|c__Clostridia|o__Clostridiales|f__Lachnospiraceae|g__Acetatifactor|s__Acetatifactor_muris	0	0	0	0	0	0	0	0	0	0	0	0	0	0	0.702	1.274	0	0
k__Bacteria|p__Proteobacteria|c__Gammaproteobacteria|o__Xanthomonadales|f__Xanthomonadaceae|g__Stenotrophomonas|s__Stenotrophomonas_sp_BIIR7	0	0	0	0	0	0	0	0	0	0	0	0	0	0	0.021	0.036	0	0
k__Bacteria|p__Firmicutes|c__Clostridia|o__Clostridiales|f__Lachnospiraceae|g__Lachnospiraceae_unclassified|s__Lachnospiraceae_bacterium_A4	0	0	0	0	0	0	0	0	0	0	0	0	0	0	0.681	6.275	0	0
k__Bacteria|p__Firmicutes|c__Clostridia|o__Clostridiales|f__Lachnospiraceae|g__Lachnospiraceae_unclassified|s__Lachnospiraceae_bacterium_A2	0	0	0	0	0	0	0	0	0	0	0	0	0	0	0.61	6.08	0	0
k__Bacteria|p__Firmicutes|c__Erysipelotrichia|o__Erysipelotrichales|f__Erysipelotrichaceae|g__Erysipelatoclostridium|s__Clostridium_cocleatum	0	0	0	0	0	0	0	0	0	0	0	0	0	0	0.567	0.379	0	0
k__Bacteria|p__Firmicutes|c__Clostridia|o__Clostridiales|f__Lachnospiraceae|g__Lachnospiraceae_unclassified|s__Lachnospiraceae_bacterium_M18_1	0	0	0	0	0	0	0	0	0	0	0	0	0	0	0.695	1.563	0	0
k__Bacteria|p__Firmicutes|c__Clostridia|o__Clostridiales|f__Lachnospiraceae|g__Lachnospiraceae_unclassified|s__Lachnospiraceae_bacterium_3_1	0	0	0	0	0	0	0	0	0	0	0	0	0	0	0.709	0.127	0	0
k__Bacteria|p__Proteobacteria|c__Epsilonproteobacteria|o__Campylobacterales|f__Helicobacteraceae|g__Helicobacter|s__Helicobacter_hepaticus	0	0	0	0	0	0	0	0	0	0	0	0	0	0	0.071	4.289	0	0
k__Bacteria|p__Firmicutes|c__Clostridia|o__Clostridiales|f__Clostridiaceae|g__Clostridium|s__Clostridium_sp_ASF356	0	0	0	0	0	0	0	0	0	0	0	0	0	0	0.482	1.232	0	0
k__Bacteria|p__Proteobacteria|c__Gammaproteobacteria|o__Enterobacterales|f__Enterobacteriaceae|g__Salmonella|s__Salmonella_enterica	0	0	0	0	0	0	0	0	0	0	0	0	0	0	0.043	0.157	0	0
k__Bacteria|p__Firmicutes|c__Clostridia|o__Clostridiales|f__Lachnospiraceae|g__Lachnospiraceae_unclassified|s__Lachnospiraceae_bacterium_COE1	0	0	0	0	0	0	0	0	0	0	0	0	0	0	0.376	14.384	0	0
k__Bacteria|p__Firmicutes|c__Clostridia|o__Clostridiales|f__Eubacteriaceae|g__Eubacterium|s__Eubacterium_plexicaudatum	0	0	0	0	0	0	0	0	0	0	0	0	0	0	0.05	0.006	0	0
k__Bacteria|p__Firmicutes|c__Clostridia|o__Clostridiales|f__Lachnospiraceae|g__Lachnospiraceae_unclassified|s__Lachnospiraceae_bacterium_3_2	0	0	0	0	0	0	0	0	0	0	0	0	0	0	0.539	0.504	0	0
k__Bacteria|p__Firmicutes|c__Clostridia|o__Clostridiales|f__Eubacteriaceae|g__Eubacterium|s__Eubacterium_sp_14_2	0	0	0	0	0	0	0	0	0	0	0	0	0	0	0.262	1.034	0	0
k__Bacteria|p__Firmicutes|c__Erysipelotrichia|o__Erysipelotrichales|f__Erysipelotrichaceae|g__Ileibacterium|s__Ileibacterium_valens	0	0	0	0	0	0	0	0	0	0	0	0	0	0	0.234	0.431	0	0
k__Bacteria|p__Firmicutes|c__Erysipelotrichia|o__Erysipelotrichales|f__Erysipelotrichaceae|g__Dubosiella|s__Dubosiella_newyorkensis	0	0	0	0	0	0	0	0	0	0	0	0	0	0	0.135	20.628	0	0
k__Bacteria|p__Firmicutes|c__Bacilli|o__Bacillales|f__Staphylococcaceae|g__Staphylococcus|s__Staphylococcus_aureus	0	0	0	0	0	0	0	0	0	0	0	0	0	0	0.007	0.011	0	0
k__Bacteria|p__Actinobacteria|c__Actinobacteria|o__Corynebacteriales|f__Corynebacteriaceae|g__Corynebacterium|s__Corynebacterium_amycolatum	0	0	0	0	0	0	0	0	0	0	0	0	0	0	0.007	0.598	0	0
k__Bacteria|p__Actinobacteria|c__Actinobacteria|o__Corynebacteriales|f__Mycobacteriaceae|g__Mycobacterium|s__Mycobacterium_canettii	0	0	0	0	0	0	0	0	0	0	0	0	0	0	0.021	0.006	0	0
k__Bacteria|p__Proteobacteria|c__Epsilonproteobacteria|o__Campylobacterales|f__Helicobacteraceae|g__Helicobacter|s__Helicobacter_japonicus	0	0	0	0	0	0	0	0	0	0	0	0	0	0	0.007	0.155	0	0
k__Bacteria|p__Proteobacteria|c__Gammaproteobacteria|o__Pseudomonadales|f__Moraxellaceae|g__Acinetobacter|s__Acinetobacter_pittii	0	0	0	0	0	0	0	0	0	0	0	0	0	0	0.007	0.031	0	0
k__Bacteria|p__Bacteroidetes|c__Bacteroidia|o__Bacteroidales|f__Tannerellaceae|g__Parabacteroides|s__Parabacteroides_gordonii	0.014	0.111	0	0	0	0	0	0	0	0	0	0	0	0	0	0	0	0
k__Bacteria|p__Firmicutes|c__Clostridia|o__Clostridiales|f__Lachnospiraceae|g__Lachnoclostridium|s__Clostridium_hylemonae	0.014	0.016	0	0	0	0	0	0	0	0	0	0	0	0	0	0	0	0
k__Bacteria|p__Firmicutes|c__Bacilli|o__Bacillales|f__Bacillales_unclassified|g__Gemella|s__Gemella_asaccharolytica	0.007	0.015	0	0	0	0	0	0	0	0	0	0	0	0	0	0	0	0
k__Bacteria|p__Firmicutes|c__Negativicutes|o__Veillonellales|f__Veillonellaceae|g__Negativicoccus|s__Negativicoccus_succinicivorans	0.007	0.005	0	0	0	0	0	0	0	0	0	0	0	0	0	0	0	0
k__Bacteria|p__Firmicutes|c__Tissierellia|o__Tissierellales|f__Peptoniphilaceae|g__Finegoldia|s__Finegoldia_magna	0.007	0.003	0	0	0	0	0	0	0	0	0	0	0	0	0	0	0	0
k__Bacteria|p__Bacteroidetes|c__Bacteroidia|o__Bacteroidales|f__Bacteroidaceae|g__Bacteroides|s__Bacteroides_sp_CAG_927	0.022	8.796	0	0	0	0	0	0	0	0	0	0	0	0	0	0	0	0
k__Bacteria|p__Firmicutes|c__Negativicutes|o__Veillonellales|f__Veillonellaceae|g__Veillonella|s__Veillonella_sp_CAG_933	0.007	0.004	0	0	0	0	0	0	0	0	0	0	0	0	0	0	0	0
k__Bacteria|p__Bacteroidetes|c__Bacteroidia|o__Bacteroidales|f__Prevotellaceae|g__Prevotella|s__Prevotella_sp_S7_1_8	0.007	0.002	0	0	0	0	0	0	0	0	0	0	0	0	0	0	0	0
k__Bacteria|p__Firmicutes|c__Clostridia|o__Clostridiales|f__Eubacteriaceae|g__Anaerofustis|s__Anaerofustis_stercorihominis	0.014	0.012	0	0	0	0	0	0	0	0	0	0	0	0	0	0	0	0
k__Bacteria|p__Firmicutes|c__Bacilli|o__Lactobacillales|f__Lactobacillaceae|g__Lactobacillus|s__Lactobacillus_rhamnosus	0.007	0.005	0	0	0	0	0	0	0	0	0	0	0	0	0	0	0	0
k__Bacteria|p__Bacteroidetes|c__Bacteroidia|o__Bacteroidales|f__Bacteroidaceae|g__Bacteroides|s__Bacteroides_stercorirosoris	0.007	0.067	0	0	0	0	0	0	0	0	0	0	0	0	0	0	0	0
k__Bacteria|p__Firmicutes|c__Bacilli|o__Lactobacillales|f__Enterococcaceae|g__Enterococcus|s__Enterococcus_dispar	0.007	0.006	0	0	0	0	0	0	0	0	0	0	0	0	0	0	0	0
k__Bacteria|p__Firmicutes|c__Bacilli|o__Lactobacillales|f__Lactobacillaceae|g__Lactobacillus|s__Lactobacillus_iners	0.014	0.022	0	0	0	0	0	0	0	0	0	0	0	0	0	0	0	0
k__Bacteria|p__Tenericutes|c__Mollicutes|o__Mycoplasmatales|f__Mycoplasmataceae|g__Mycoplasma|s__Mycoplasma_hominis	0.007	0.051	0	0	0	0	0	0	0	0	0	0	0	0	0	0	0	0
k__Bacteria|p__Firmicutes|c__Clostridia|o__Clostridiales|f__Eubacteriaceae|g__Eubacterium|s__Eubacterium_limosum	0.007	0.005	0	0	0	0	0	0	0	0	0	0	0	0	0	0	0	0
k__Bacteria|p__Firmicutes|c__Clostridia|o__Clostridiales|f__Clostridiaceae|g__Clostridium|s__Butyribacterium_methylotrophicum	0.007	0.003	0	0	0	0	0	0	0	0	0	0	0	0	0	0	0	0
k__Bacteria|p__Firmicutes|c__Tissierellia|o__Tissierellales|f__Peptoniphilaceae|g__Anaerococcus|s__Anaerococcus_lactolyticus	0.007	0.003	0	0	0	0	0	0	0	0	0	0	0	0	0	0	0	0

## Sheet: Table S4
Table S4: UniRef90 clusters that are present at >=90% of the samples of at least one cohort
Function	HMP.phase1	HMP.phase2	HMP.phase3	MetaHit.Healthy	MetaHit.IBD	Traditional	Gorillas	Mice	Chicken
UniRef90_A7AJP8	1	1	1	1	1	1	1	1	0.959
UniRef90_A7B5X2	1	1	1	1	1	1	1	1	0.967
UniRef90_A0A0P0LMS1	0.855	0.813	0.929	0.875	0.688	0.158	0	0.781	0.818
UniRef90_A5ZYU5	0.761	0.758	0.643	1	0.812	1	1	0.969	0.868
UniRef90_J7TUV6	0.63	0.769	0.667	0.969	0.875	1	1	1	0.926
UniRef90_A0A174NV69	1	0.967	1	0.984	1	0.947	1	1	0.876
UniRef90_P37247	0.319	0.33	0.452	0.625	1	0.211	0	0	0.653
UniRef90_A7UXY6	1	0.989	1	1	1	1	1	0.844	0.909
UniRef90_D0TK99	1	0.989	1	1	1	1	1	1	0.818
UniRef90_A5ZYU0	0.804	0.802	0.762	1	1	1	1	1	0.917
UniRef90_A7V4G3	0.957	0.945	0.905	0.984	0.938	0.368	0.467	0.781	0.719
UniRef90_A0A3E4HP53	0.993	0.978	1	0.984	1	0.947	1	0.844	0.901
UniRef90_A0A2K0XJM9	0.42	0.396	0.405	0.516	0.688	1	1	0.5	0.777
UniRef90_A0A0E1X896	0.848	0.769	0.786	0.984	0.875	1	1	0.969	0.975
UniRef90_A7V4G2	1	0.989	1	1	1	1	0.8	0.938	0.917
UniRef90_A0A396E587	0.862	0.725	0.786	0.859	0.938	0.526	0	0.062	0.752
UniRef90_E5VDI7	0.797	0.802	0.738	0.812	1	0.105	0	0	0.785
UniRef90_C0BDI2	1	0.989	1	1	1	1	0	1	0.727
UniRef90_A0A069RZ42	0.826	0.736	0.833	0.906	0.938	0.895	0.933	0.906	0.719
UniRef90_A5KRL1	0.993	1	1	1	1	1	1	1	0.967
UniRef90_B5CUP9	0.609	0.56	0.905	0.859	1	0.895	1	0.75	0.942
UniRef90_A0A069S980	0.971	0.967	1	0.984	1	0.684	0	0.812	0.785
UniRef90_A0A173XT59	1	0.978	1	1	1	1	1	0.906	0.835
UniRef90_A5ZYV3	0.87	0.923	0.881	1	1	1	1	1	0.926
UniRef90_A8S6F0	0.993	0.989	1	1	1	1	1	1	0.975
UniRef90_A6BKY7	0.899	0.923	0.905	1	0.938	1	1	1	0.736
UniRef90_A7B6K2	0.957	0.967	0.929	1	1	1	1	1	0.95
UniRef90_A0A3E2XRS1	0.529	0.626	0.524	0.922	0.875	0.895	0.133	0	0.14
UniRef90_A0A1E3U755	1	1	1	1	1	1	0	1	0.843
UniRef90_A0A174N306	0.993	0.989	1	1	1	0.579	0	0.875	0.876
UniRef90_A0A176U927	1	1	1	1	1	1	0	1	0.802
UniRef90_E2SRB6	1	0.989	1	1	1	0.947	0.067	1	0.736
UniRef90_A0A2I1K572	0.841	0.879	0.857	1	0.938	1	1	0.656	0.826
UniRef90_B0NWG2	0.978	0.989	1	0.984	1	0.842	0.933	0.844	0.835
UniRef90_B0PBV1	1	1	1	1	1	1	0	1	0.835
UniRef90_D4JMJ7	0.13	0	0	1	0.875	0.158	0	0	0
UniRef90_A8SBJ8	0.964	0.967	0.905	1	0.938	1	1	0.969	0.917
UniRef90_J7SHX6	0.732	0.824	0.881	0.781	0.812	1	1	0.969	0.934
UniRef90_C4ZER8	0.993	0.978	1	1	1	0.947	0	1	0.818
UniRef90_A0A174QSW1	0.986	1	0.976	1	1	1	1	0.531	0.645
UniRef90_A0A139KBM3	1	1	1	1	1	0.474	0	0.938	0.868
UniRef90_A0A3E5E271	0.993	1	1	1	1	1	0	1	0.826
UniRef90_A5Z326	0.884	0.813	0.786	0.984	0.875	0.947	0.933	1	0.843
UniRef90_U2PTP8	0.732	0.769	0.786	1	0.938	1	0.267	0.25	0.554
UniRef90_D4VB58	0.899	0.923	0.976	0.953	0.938	0.895	0.933	0.812	0.81
UniRef90_C3R2Z0	1	1	1	0.984	1	1	0	0.75	0.81
UniRef90_S3Y7P2	0.812	0.758	0.714	0.906	0.938	0.316	0	0	0.694
UniRef90_A5KR94	0.978	1	1	1	0.938	1	1	1	0.942
UniRef90_A0A173XQ94	0.899	0.956	0.976	0.891	0.812	0.947	0.933	0.812	0.86
UniRef90_A7VSA4	0.833	0.901	0.833	0.828	0.75	0.895	1	1	0.736
UniRef90_A8S6E9	0.964	0.978	0.929	1	0.938	1	1	0.969	0.917
UniRef90_A0A173W2S0	0.688	0.747	0.69	0.922	0.75	0.737	0	0	0
UniRef90_A5ZTV7	0.986	0.989	1	1	1	1	1	1	0.926
UniRef90_A7LQH0	0.884	0.846	0.952	0.875	0.875	0.632	0.8	0.219	0.331
UniRef90_A7VSA7	0.732	0.692	0.786	0.984	0.812	0.842	1	1	0.95
UniRef90_C0CTR8	0.717	0.769	0.714	1	0.75	1	0.133	0.75	0.157
UniRef90_A0A174MXP5	0.645	0.714	0.643	1	0.812	0.947	0.333	0.031	0.033
UniRef90_W1V823	0.674	0.121	0.143	1	1	0.474	0.667	1	0.008
UniRef90_R9KS72	0.681	0.692	0.69	1	0.75	0.947	0.2	0.062	0.058
UniRef90_A0A373DB80	0.609	0.637	0.667	0.953	0.812	0.842	0.2	0.219	0
UniRef90_A0A174MUS7	0.667	0.747	0.738	1	0.812	1	0.133	0.219	0.033
UniRef90_U2NWT3	0.812	0.758	0.714	1	0.688	1	0.8	0.719	0.099
UniRef90_B0NLN7	1	0.989	1	0.953	0.875	0.579	0.267	0.844	0.636
UniRef90_A7AZN6	1	1	1	1	1	1	0	1	0.727
UniRef90_Q08425	1	1	1	0.984	1	1	0	0.875	0.901
UniRef90_A0A3E2W7G5	0.949	0.967	0.905	1	0.875	1	0.267	0	0.76
UniRef90_A5KRI2	0.884	0.923	0.929	0.984	0.938	1	1	1	0.893
UniRef90_A0A127SMK3	0.783	0.813	0.833	0.953	1	0.947	0.867	0.375	0.818
UniRef90_A0A3E2W8H8	0.978	0.945	0.905	1	0.875	1	0.8	0	0.686
UniRef90_A5ZYK6	0.986	1	1	1	1	1	1	1	0.835
UniRef90_D4LUC8	0.761	0.846	0.738	0.984	0.938	0.947	0.133	0.094	0.843
UniRef90_B0GAB5	1	1	1	1	1	1	0	1	0.81
UniRef90_A7V4G1	1	0.989	1	1	1	0.421	0	0.844	0.612
UniRef90_A0A380ZJT8	0.775	0.78	0.905	0.781	0.688	0.053	0	0.594	0.355
UniRef90_G5GK96	0.486	0.659	0.595	0.906	0.562	0.895	0.4	0.031	0.008
UniRef90_G5GK94	0.688	0.725	0.667	1	0.812	1	0.2	0.094	0.017
UniRef90_A0A396G4X1	0.986	0.989	0.976	1	1	1	0	1	0.843
UniRef90_E6SR85	1	1	1	1	1	1	1	1	0.851
UniRef90_C0CTT4	0.732	0.758	0.643	1	0.75	0.947	0.4	0.188	0.008
UniRef90_A7ACK1	0.862	0.901	0.762	0.859	0.938	0.211	0.133	0.594	0.066
UniRef90_U2KCM5	0.957	0.956	0.905	1	1	0.895	0	0	0.711
UniRef90_A7VSA5	0.616	0.736	0.69	0.828	0.688	0.737	0.933	0.969	0.802
UniRef90_C0CTS1	0.768	0.78	0.69	1	0.812	1	0.667	0.219	0.017
UniRef90_A0A3E4GL34	0.79	0.78	0.929	0.969	0.812	1	0.933	0.375	0.488
UniRef90_A0A396GCB6	0.971	0.967	0.952	1	0.938	0.789	0	1	0.62
UniRef90_A0A174N161	0.63	0.725	0.69	1	0.812	0.947	0.4	0.094	0.025
UniRef90_U2PFL2	0.609	0.703	0.69	0.984	0.812	0.947	0.267	0.031	0.017
UniRef90_I4Z7P1	1	1	1	0.984	1	1	0	0.844	0.835
UniRef90_A0A3E2V1V9	0.949	0.967	0.905	1	0.938	1	1	0.781	0.645
UniRef90_R7KL80	1	0.989	1	1	1	0.737	1	0.844	0.843
UniRef90_K6AL67	1	1	1	0.984	1	1	0	0.781	0.81
UniRef90_D4JQL3	0.87	0.89	0.81	0.984	1	0.947	1	0.906	0.826
UniRef90_D4LZT5	0.449	0.44	0.286	0.922	0.5	0.316	0	0	0
UniRef90_E9RZN0	1	1	1	1	1	1	1	1	0.934
UniRef90_A0A173YJ72	0.775	0.78	0.738	1	0.75	1	0.467	0.75	0
UniRef90_Q5L8C7	1	0.989	1	0.984	1	0.526	0	0.844	0.818
UniRef90_A7VSA3	0.812	0.769	0.881	0.984	0.812	0.947	1	1	0.818
UniRef90_A0A395X2Y6	0.493	0.495	0.262	0.906	0.688	0.211	0	0.25	0.008
UniRef90_A6KYH2	1	0.989	1	1	1	1	1	1	0.86
UniRef90_A0A173W330	0.87	0.945	0.857	1	0.938	1	0.867	0.969	0.603
UniRef90_Q8A474	1	0.989	1	1	1	0.842	0.667	0.844	0.868
UniRef90_Q8A480	1	0.989	1	1	1	0.947	1	0.844	0.802
UniRef90_A7V5N8	1	0.978	1	1	0.875	0.158	0	0	0.041
UniRef90_C0CTT0	0.572	0.659	0.738	1	0.625	0.947	0.267	0.188	0.008
UniRef90_A0A396FGB3	0.949	0.901	0.881	0.969	0.938	0.895	0.667	0.031	0.388
UniRef90_A0A174CTY8	1	1	1	1	1	1	0	1	0.777
UniRef90_B7B4Y7	0.993	0.978	1	1	1	0.368	0	0.875	0.86
UniRef90_Q8A483	1	0.989	1	1	1	0.737	0.733	0.938	0.843
UniRef90_A0A3E4RID7	0.79	0.857	0.857	0.891	0.938	0.211	0	0.25	0.496
UniRef90_V8M0W9	0.964	0.956	1	0.797	0.875	0.842	0.933	0.719	0.752
UniRef90_A0A017N650	0.993	0.989	1	1	1	0.526	0	0.875	0.248
UniRef90_K1FAD2	0.978	0.956	0.952	0.906	1	0.579	0	0.688	0.744
UniRef90_A6BD33	0.971	0.989	0.952	1	1	0.947	0.333	0.094	0.752
UniRef90_A0A175AB67	0.841	0.78	0.81	0.953	0.812	1	1	0.938	0.942
UniRef90_U2RIC0	0.768	0.835	0.786	0.984	0.938	0.947	0.133	0.094	0.81
UniRef90_R9LJ58	0.971	1	0.952	1	1	1	0	1	0.488
UniRef90_A6L050	0.993	0.978	1	1	1	0.526	0.267	0.844	0.802
UniRef90_B2RH62	1	0.989	1	1	1	0.526	0	0.844	0.835
UniRef90_Q8A466	1	0.989	1	1	1	0.737	0.6	0.938	0.86
UniRef90_A7LYP6	0.906	0.901	0.952	0.766	0.75	0.211	0	0.312	0.488
UniRef90_A0A396GB52	1	0.967	0.929	1	1	0.947	0	0.406	0.529
UniRef90_A7V2J3	0.761	0.835	0.857	0.906	0.938	0.421	0	0.25	0.488
UniRef90_Q5L8B5	1	0.989	1	1	1	0.632	0.8	0.844	0.86
UniRef90_J9G1B6	0.899	0.747	0.619	0.922	1	0.632	0.667	0.656	0.736
UniRef90_R5ZRR5	0	0.011	0	0.125	0	0.368	0.933	0	0
UniRef90_A0A174EV71	0.971	0.989	0.952	1	1	0.947	0	0.125	0.736
UniRef90_A0A0N7J6W0	1	1	1	0.984	1	1	0	0.875	0.785
UniRef90_D4CI30	0.891	0.923	0.952	1	1	1	1	1	0.893
UniRef90_Q8A488	1	0.989	1	1	1	0.526	0.267	0.844	0.835
UniRef90_F3PQ22	1	0.989	1	1	1	0.684	1	0.844	0.835
UniRef90_Q8A469	1	0.989	1	1	1	0.579	0.8	0.875	0.81
UniRef90_Q8A485	1	0.989	1	0.984	1	0.684	0.733	0.844	0.86
UniRef90_A0A3E4TAH0	1	0.989	1	1	1	1	0	0.906	0.835
UniRef90_A0A0B0HFJ5	0.594	0.473	0.381	0.984	0.938	0.895	1	1	0.884
UniRef90_A8S9X2	0.949	0.967	0.857	1	0.875	1	0.267	0	0.041
UniRef90_A0A174G660	0.993	0.934	1	1	0.938	0.421	0	0.719	0.314
UniRef90_A6L0V1	1	0.989	1	1	1	0.579	0.333	0.844	0.802
UniRef90_A0A139JRM5	1	0.989	1	1	1	0.684	1	0.938	0.835
UniRef90_Q8A0Z8	1	0.989	1	1	1	0.263	0.2	0.844	0.76
UniRef90_A0A174EBX1	0.746	0.758	0.81	1	0.812	1	0.133	0.094	0.008
UniRef90_Q8A6M0	1	0.989	1	1	1	0.632	0.533	0.844	0.835
UniRef90_Q8A465	1	0.989	1	1	1	0.579	0.467	0.844	0.851
UniRef90_A6KYS7	0.978	0.967	1	0.984	0.875	0.211	0.4	0.844	0.76
UniRef90_Q8A4V8	1	0.989	1	1	1	0.789	0.4	0.844	0.835
UniRef90_Q8A481	1	0.989	1	1	1	0.474	0.6	0.844	0.818
UniRef90_A0A2A7A3R9	0.942	0.956	0.929	0.953	0.938	0.842	0	0	0
UniRef90_A0A139L6L7	1	0.989	1	1	1	0.842	0.867	0.938	0.851
UniRef90_A6KYJ9	1	0.989	1	1	1	1	1	1	0.851
UniRef90_R5C195	1	0.989	1	1	1	0.789	0.933	0.844	0.876
UniRef90_G5GK99	0.565	0.582	0.5	0.953	0.875	0.947	0.733	0.875	0.281
UniRef90_C7H3I9	0.993	0.978	1	1	1	1	0	1	0.769
UniRef90_R6JM89	1	0.989	1	1	1	0.474	0.067	0.844	0.802
UniRef90_K1RN31	0.601	0.538	0.5	0.891	0.938	0	0	0	0
UniRef90_G9RSQ0	0.978	1	0.952	1	1	0.947	0.8	0.25	0.694
UniRef90_A0A173VH24	0.978	1	0.976	1	1	0.947	0	1	0.38
UniRef90_R5ZDX3	0.007	0.022	0	0.109	0	0.211	0.933	0	0
UniRef90_G2T0F8	1	1	1	1	1	1	0	1	0.81
UniRef90_Q8A492	1	0.989	1	0.984	1	0.579	0.6	0.844	0.81
UniRef90_A0A3E4USV0	1	0.989	1	0.984	1	0.947	0	0.812	0.818
UniRef90_A0A139KBQ1	0.986	0.967	0.976	0.969	0.938	0.316	0	0.844	0.43
UniRef90_A0A396B2Z4	0.783	0.835	0.833	0.891	0.938	0.368	0	0.312	0.579
UniRef90_D4V727	0.942	0.912	0.952	0.922	0.75	0.158	0	0.781	0.413
UniRef90_G5GJE6	0.703	0.758	0.714	1	0.75	0.947	0.733	0.062	0.025
UniRef90_A6L1I4	1	0.989	1	1	1	0.684	0.533	0.844	0.851
UniRef90_Q8AAN9	1	0.989	1	1	1	0.947	0.867	0.844	0.843
UniRef90_A8S630	0.949	0.978	0.952	1	0.938	1	0.067	0.969	0.702
UniRef90_A0A174IYR9	0.993	1	1	1	1	1	1	1	0.769
UniRef90_K9E6V7	1	1	1	0.984	1	0.947	0	0.781	0.793
UniRef90_A6LEG9	1	0.989	1	1	1	1	1	1	0.851
UniRef90_D4LY54	0.616	0.626	0.524	0.984	1	0	0	0.656	0.686
UniRef90_C0FVQ3	0.826	0.802	0.69	0.969	0.812	0.895	0	0.188	0.132
UniRef90_Q8A6P8	1	0.989	1	1	1	0.579	0.733	0.844	0.826
UniRef90_C4Z9A0	0.862	0.89	0.833	1	0.812	0.895	0.133	0.125	0
UniRef90_B5D2D5	1	0.989	1	1	1	0.737	0.933	0.844	0.893
UniRef90_A0A136WGM7	1	1	1	1	1	1	0	1	0.719
UniRef90_Q8A9M2	1	0.989	1	1	1	0.263	0.933	1	0.744
UniRef90_A0A0M6WCQ3	0.935	0.945	0.905	1	0.938	1	0.933	0.969	0.033
UniRef90_R5CD91	1	0.989	1	1	1	0.579	0	0.844	0.835
UniRef90_D4JA61	0.819	0.89	0.905	0.953	0.812	0.053	0	0.375	0.736
UniRef90_R6MNH0	1	0.989	1	1	1	1	0.8	0.844	0.876
UniRef90_D1KAJ3	1	0.989	1	1	1	1	1	1	0.967
UniRef90_B0PDG6	0.826	0.879	0.81	0.922	0.938	0.895	0	0.031	0.298
UniRef90_A0A076IXF3	0.971	0.956	1	0.953	0.875	0.263	0.067	0.844	0.686
UniRef90_C5EDJ4	0.587	0.571	0.595	0.891	0.875	0.684	1	0.375	0.545
UniRef90_Q8A493	1	0.989	1	1	1	0.632	0.6	0.844	0.793
UniRef90_A6KYI5	0.993	0.978	1	1	0.938	1	1	0.844	0.86
UniRef90_W4PUR5	1	0.989	1	1	1	0.895	1	1	0.876
UniRef90_P94598	1	0.989	1	1	1	0.579	0.733	0.844	0.826
UniRef90_A0A139KPT2	1	0.989	1	1	1	0.421	0.867	0.875	0.76
UniRef90_Q8A499	1	0.989	1	1	1	1	1	0.938	0.86
UniRef90_A0A127T671	0.638	0.615	0.643	0.984	0.875	0.789	0.8	0.844	0.512
UniRef90_O52836	1	0.989	1	1	1	1	0	1	0.992
UniRef90_A5KRL0	0.899	0.901	0.952	0.984	1	1	0.267	0.844	0.471
UniRef90_Q9XBG8	0.92	0.89	0.905	0.703	1	0.947	0	0	0.802
UniRef90_A6KYH0	0.993	0.978	1	1	0.938	0.579	0.933	0.844	0.835
UniRef90_A6L6L6	0.993	1	1	1	1	0.684	0	0.875	0.653
UniRef90_B6W2B1	1	0.989	1	1	1	0.526	0.533	0.844	0.818
UniRef90_A0A133PU47	1	1	1	0.984	1	1	0	0.875	0.802
UniRef90_A0A069D0K7	1	0.989	1	1	1	0.632	0	0.812	0.843
UniRef90_A0A133PRD5	1	1	1	0.984	1	0.947	0	0.719	0.826
UniRef90_Q8A8P8	0.942	0.912	0.952	0.953	0.812	0.211	0	0	0.405
UniRef90_I9U5E7	0.841	0.758	0.714	0.906	0.75	0.053	0	0.5	0
UniRef90_A0A3E5H7Z7	0.942	0.912	0.952	0.938	0.812	0.158	0	0	0.405
UniRef90_Q9AE24	1	0.989	1	1	1	1	0.933	0.844	0.835
UniRef90_A6KYR3	0.993	0.989	1	0.969	1	0.421	0.933	0.844	0.835
UniRef90_E1YSQ9	1	0.989	1	0.984	1	1	0	0.938	0.876
UniRef90_A0A140JXE0	0.913	0.857	0.833	0.984	1	0.316	0.4	0.875	0.843
UniRef90_A0A3E5GAA7	0.978	0.978	0.952	1	1	1	0.467	0.125	0
UniRef90_A6L227	1	0.989	1	1	1	0.474	0.6	0.844	0.818
UniRef90_A8RRJ5	1	1	0.976	1	1	0.947	0	1	0.785
UniRef90_A0A3E5DK23	1	0.989	1	1	1	1	0	0.844	0.777
UniRef90_A0A396A9Y4	0.986	0.978	0.952	1	1	1	0	0	0.058
UniRef90_A7LS50	0.913	0.89	0.952	0.922	0.875	0.158	0.067	0.031	0.405
UniRef90_A6KXG8	1	0.989	1	1	1	0.947	0.467	0.844	0.793
UniRef90_A0A0P0M4R8	1	0.989	1	1	1	0.263	0.133	0.844	0.802
UniRef90_A0A0P0L353	0.993	0.978	1	0.984	1	0.895	1	0.844	0.793
UniRef90_Q8AA33	1	0.989	1	1	1	0.684	0.8	0.844	0.835
UniRef90_C3R499	0.906	0.868	0.905	0.391	0.75	0.316	0.067	0	0.05
UniRef90_Q8A475	1	0.978	1	1	1	1	1	1	0.876
UniRef90_B0G8N9	0.978	0.978	0.976	1	1	1	0.467	0.75	0.008
UniRef90_A0A015SML5	0.884	0.879	0.881	0.562	0.875	0.947	0	0.031	0.512
UniRef90_A6LE88	0.993	0.978	1	1	1	0.737	1	1	0.835
UniRef90_A0A140JXE1	0.913	0.835	0.881	0.984	1	0.158	0.133	0.812	0.835
UniRef90_Q8A0Z5	1	0.989	1	1	1	0.368	0	0.844	0.802
UniRef90_R5MXZ2	1	0.989	1	1	1	0.684	0.733	0.844	0.876
UniRef90_A0A3E5DLS5	1	0.989	1	0.984	1	1	0	0.875	0.826
UniRef90_A0A396DV75	1	1	1	0.984	1	1	0	0.781	0.826
UniRef90_R6DH93	0.978	0.989	1	0.984	0.938	0.368	0.067	0.844	0.793
UniRef90_A0A0P0L796	1	0.989	1	1	1	0.737	0.733	0.844	0.81
UniRef90_P94316	1	0.989	1	1	1	0.632	0.6	0.844	0.802
UniRef90_R7DWY8	1	0.989	1	1	1	0.368	0.467	0.844	0.835
UniRef90_A0A3E2UZH5	0.891	0.857	0.762	1	0.812	0.737	0	0.031	0.496
UniRef90_G8FXM5	1	0.978	1	1	1	1	0	1	0.876
UniRef90_Q8A6P7	1	0.989	1	1	1	0.579	0.2	0.75	0.785
UniRef90_B2RLW9	1	0.989	1	1	1	0.789	0.467	0.844	0.843
UniRef90_A0A076IUR5	0.971	0.956	1	0.969	0.938	0.368	0.733	0.844	0.802
UniRef90_Q8AA38	1	0.989	1	1	1	0.474	0.467	0.844	0.769
UniRef90_A6L7J7	0.993	0.978	1	1	1	0.579	0.467	0.812	0.802
UniRef90_A6L5E4	1	0.989	1	0.984	1	0.579	0.8	0.844	0.785
UniRef90_B6FT18	0.978	1	0.929	1	1	0.526	0.133	0.969	0.074
UniRef90_D4JA60	0.906	0.923	0.881	1	0.938	0.211	0	0	0.727
UniRef90_C0BDI1	0.768	0.692	0.81	0.984	0.875	0.579	0	0.594	0.099
UniRef90_A0A329UIW4	0.993	0.989	0.929	1	1	1	0	0	0.256
UniRef90_A0A173YTU2	0.964	0.989	0.952	1	1	1	0	0.156	0.785
UniRef90_B0NR18	1	0.989	1	1	1	0.316	0.267	0.844	0.719
UniRef90_A0A139SYK8	1	0.989	1	1	1	0.474	0.267	0.844	0.793
UniRef90_D4KKP9	0.949	0.989	0.952	1	1	0.947	0	0	0
UniRef90_D4LWI4	0.986	1	0.976	1	1	0.947	0	1	0.57
UniRef90_K0WTB3	0.797	0.846	0.905	0.984	0.938	0.947	1	1	0.752
UniRef90_A6KWD6	1	0.989	1	1	1	1	1	1	0.826
UniRef90_U6R8L3	0.986	0.923	0.952	0.984	1	0.737	0.333	1	0.76
UniRef90_U2QZ59	0.884	0.791	0.786	0.984	0.875	0.684	0.133	1	0.207
UniRef90_Q5LIX0	1	0.989	1	1	1	0.737	0.6	0.844	0.785
UniRef90_R6CPJ3	1	0.989	1	1	0.938	0.947	1	0.969	0.86
UniRef90_R7AEJ7	0.993	0.978	1	0.984	1	0.632	0.267	0.844	0.752
UniRef90_A0A1E3AIV3	0.978	1	0.952	1	1	1	0	1	0.678
UniRef90_Q8A9J2	1	0.989	1	1	1	0.421	0.4	0.844	0.719
UniRef90_D4VDF7	1	0.989	1	1	1	0.368	0.133	0.844	0.769
UniRef90_A8SEV7	0.942	0.945	0.905	1	0.875	1	0.667	0.438	0.884
UniRef90_A0A139JUF4	1	0.989	1	1	1	0.632	0.333	0.844	0.843
UniRef90_A0A0K6BVC0	1	0.989	1	1	1	0.684	0.8	0.844	0.777
UniRef90_C0B7X0	0.978	0.989	0.929	1	1	0.579	0	0.812	0.058
UniRef90_Q8A1A7	1	0.989	1	1	1	0.474	0.4	0.812	0.785
UniRef90_E1YX32	0.906	0.835	0.881	0.516	0.875	0.895	0	0	0.521
UniRef90_D4K4J9	0.971	0.967	0.929	1	0.938	0.842	0	0	0
UniRef90_A7V2I1	0.87	0.857	0.976	0.922	0.875	0.632	0.067	0	0.645
UniRef90_A0A395UGL2	0.957	0.967	0.952	0.953	0.938	0.263	0	0.75	0.851
UniRef90_B0N9J6	0.957	0.989	0.952	1	1	1	0	0.094	0.777
UniRef90_D4VAE5	0.891	0.879	0.905	0.547	0.875	0.947	0	0	0.628
UniRef90_D4WHX6	1	1	1	0.984	1	1	0	0.781	0.777
UniRef90_A6L012	0.971	0.967	1	0.969	1	0.421	0.067	0.844	0.793
UniRef90_A6KXK3	0.971	0.945	1	0.953	0.938	0.474	0	0.844	0.694
UniRef90_E2ZLQ0	0.964	0.967	0.952	1	1	0.947	0	0.25	0.719
UniRef90_G2T5K3	0.986	0.978	0.952	1	1	1	0	0	0.05
UniRef90_A6L0E8	0.971	0.945	1	0.953	0.875	0.421	0.533	0.844	0.76
UniRef90_A0A078PLC9	1	0.989	1	0.984	0.938	0.158	0	0	0.066
UniRef90_A0A174DNB1	0.986	0.978	1	1	0.938	0.947	0.867	0.75	0.86
UniRef90_D4C6N2	0.971	0.989	0.952	1	1	0.947	0.133	0.031	0.793
UniRef90_A0A396AHV1	0.935	0.901	0.929	1	0.938	1	0.333	0.531	0
UniRef90_W1I5F4	0.949	0.945	1	0.688	1	0	0	0.094	0.876
UniRef90_R7CVM1	0.993	0.978	1	0.984	0.938	0.211	0.4	0.844	0.727
UniRef90_A0A173YLD5	0.717	0.802	0.714	0.984	0.812	0.947	0.667	0.062	0.017
UniRef90_D3AQS6	0.949	0.967	0.929	1	0.938	0.947	0.067	0.031	0.033
UniRef90_A6KYK4	1	0.989	1	0.984	1	0.263	0.4	0.844	0.851
UniRef90_A5ZWS7	0.884	0.813	0.786	1	1	1	0.8	0.094	0.008
UniRef90_A0A174PPU0	1	0.989	1	1	1	1	0.933	0.844	0.818
UniRef90_F3QWL6	0.913	0.89	0.952	0.859	0.938	0.211	0	0.844	0.702
UniRef90_A0A3E4IFP6	1	0.989	1	1	0.938	0.211	0	0.094	0.074
UniRef90_E4VR83	1	0.989	1	1	1	1	0	0.844	0.81
UniRef90_B5D0R0	1	0.989	1	1	0.938	0.263	0	0	0.058
UniRef90_R5MR58	0.971	0.945	1	0.953	0.875	0.211	0.267	0.844	0.76
UniRef90_A0A174VDA7	0.978	1	0.976	1	1	0.947	0	0.156	0.711
UniRef90_D4LY53	0.674	0.604	0.738	1	1	0	0	0.969	0.752
UniRef90_D4KV25	0.478	0.473	0.548	0.984	1	0	0	0.25	0.504
UniRef90_A5KP23	0.913	0.978	0.929	1	0.875	1	0.867	0.969	0.86
UniRef90_A6KYJ5	0.971	0.956	1	0.969	0.938	0.579	0.867	0.812	0.793
UniRef90_Q8A1F6	1	0.989	1	1	1	0.474	0.733	0.844	0.785
UniRef90_Q5LG30	1	0.989	1	1	1	0.579	0.8	0.719	0.826
UniRef90_U2J7N1	0.862	0.846	0.952	0.781	0.688	0.789	0	0	0.678
UniRef90_A0A395UQZ5	0.971	0.945	1	0.953	0.875	0.158	0.067	0.844	0.719
UniRef90_A7UZU6	0.986	0.934	0.881	0.984	1	0.263	0	0.906	0.545
UniRef90_R6Y9C3	0.971	0.956	1	0.953	0.938	0.684	0.867	0.844	0.851
UniRef90_U7UPK0	1	0.989	1	1	1	1	0	0.906	0.81
UniRef90_UPI0009B6CAA6	0.935	0.934	0.81	1	0.875	1	0	0	0.025
UniRef90_A0A088F5Q4	0.819	0.857	0.881	0.812	1	0.947	0	0.656	0.777
UniRef90_G2T0I6	0.877	0.791	0.69	0.984	0.812	0.684	0.133	0	0
UniRef90_A0A076IX78	0.971	0.945	1	0.953	0.875	0.211	0	0.844	0.727
UniRef90_A0A120A0G9	0.971	0.934	1	0.984	1	1	0	0.25	0.752
UniRef90_A6L1X1	0.971	0.956	1	0.953	0.875	0.316	0.6	0.844	0.769
UniRef90_A0A076IVA3	1	0.989	1	0.984	1	0.316	0.267	0.844	0.702
UniRef90_D4JS14	0.978	0.967	0.952	1	1	0.789	0	0	0
UniRef90_A0A0E2T0E4	0.5	0.56	0.69	0.594	1	0.474	0	0.375	0.727
UniRef90_A6KYI2	0.971	0.967	1	0.953	0.938	0.368	0.6	0.844	0.793
UniRef90_A6KWD7	1	0.989	1	0.984	1	0.316	0.6	0.844	0.818
UniRef90_B3JFM7	0.993	0.978	1	0.969	1	0.263	0	0.844	0.818
UniRef90_F0R8V1	0.971	0.967	1	0.953	0.875	0.263	0.067	0.75	0.843
UniRef90_Q8A490	1	0.989	1	1	1	0.737	0.933	0.844	0.851
UniRef90_E6ST13	1	0.978	1	0.984	0.938	0.316	0.8	0.844	0.835
UniRef90_A5KR91	0.942	0.956	0.976	1	1	1	1	1	0.884
UniRef90_B5CXZ6	0.978	0.967	1	0.969	0.812	0.316	0.8	0.719	0.81
UniRef90_F7JMP3	0.993	0.989	0.976	1	1	0.684	0	0.188	0.025
UniRef90_S0F7I4	0.964	0.956	1	0.953	0.875	0.526	0.533	0.844	0.818
UniRef90_E5WU41	0.906	0.879	0.881	0.609	0.938	1	0	0	0.669
UniRef90_A5KIS9	0.971	0.978	0.952	1	1	0.947	0	0.156	0.793
UniRef90_A0A1Y4PHF8	0.949	0.923	0.976	0.703	1	0	0	0.031	0.843
UniRef90_C3QN54	1	0.989	1	0.984	0.938	0.211	0	0	0.066
UniRef90_A0A3E2V1T3	0.986	0.956	0.905	1	0.938	1	0.667	0.438	0.851
UniRef90_D7NG96	0.899	0.89	0.905	0.562	1	1	0	0	0.686
UniRef90_A5ZLR0	0.891	0.78	0.905	0.828	0.938	0.211	0	0.938	0.058
UniRef90_R6J7M6	1	0.989	1	0.984	1	0.316	0	0.844	0.669
UniRef90_A0A3E4IMU5	0.993	0.934	1	0.969	0.812	0.158	0.067	0.719	0.033
UniRef90_S0F7Y5	0.971	0.945	1	0.953	0.812	0.263	0	0.844	0.81
UniRef90_A0A139LDE6	0.949	0.912	0.905	0.969	0.938	0.368	0	0.5	0.777
UniRef90_A6KYG9	0.971	0.956	1	0.953	0.812	0.211	0	0.75	0.785
UniRef90_R6ZMG2	0.971	0.956	1	0.953	0.875	0.368	0.6	0.844	0.835
UniRef90_C0FN88	0.87	0.769	0.69	0.938	0.812	0.158	0	0	0.008
UniRef90_A0A0P0L6M5	0.971	0.956	1	0.969	0.938	0.789	0.667	0.844	0.785
UniRef90_I9QVV4	1	0.989	1	0.984	1	0.947	0	0.75	0.777
UniRef90_Q5L8B2	0.993	0.989	1	1	1	0.789	1	0.844	0.851
UniRef90_A0A076IWP2	0.964	0.945	1	0.953	0.875	0.316	0.133	0.844	0.736
UniRef90_A0A3E4IFT2	1	0.989	1	1	0.938	0.263	0	0.406	0.091
UniRef90_A8RDX0	0.971	0.989	0.952	1	1	0.947	0	0.031	0.545
UniRef90_A9KJG8	0.993	0.989	0.976	1	1	1	1	1	0.785
UniRef90_D5HH09	0.652	0.615	0.762	1	1	0	0	0.75	0.793
UniRef90_A0A173S9W5	0.978	0.978	0.952	1	1	1	0.4	0	0
UniRef90_D0TLK8	0.993	0.978	1	1	0.938	0.263	0	0.656	0.512
UniRef90_A0A0E9FSE3	0.978	1	0.929	1	0.938	0.632	0	0.812	0.107
UniRef90_A7ACF2	0.993	0.989	1	0.938	1	1	1	0.844	0.86
UniRef90_B5D0R2	1	0.989	1	1	0.938	0.211	0	0	0.066
UniRef90_A0A076J5A3	0.971	0.945	1	0.953	0.875	0.158	0.2	0.844	0.603
UniRef90_C4Z2U0	0.993	0.989	1	1	1	1	1	1	0.669
UniRef90_A0A0P0M4G8	1	0.989	1	1	1	0.789	1	0.875	0.81
UniRef90_D4JTZ8	0.942	0.912	0.833	1	0.938	0.947	0	0.031	0.264
UniRef90_UPI00059550CE	0.681	0.714	0.738	0.984	0.688	0.947	0.733	0.625	0.025
UniRef90_A0A329U9G1	0.717	0.659	0.667	0.984	0.875	1	0.333	0.75	0.446
UniRef90_A8R8S8	0.964	0.967	0.881	1	0.938	0.947	0	0	0.264
UniRef90_A0A3E5E4Y3	0.906	0.89	1	0.828	0.812	0.842	0	0	0.653
UniRef90_S0F674	0.971	0.945	1	0.953	0.875	0.368	0.4	0.844	0.785
UniRef90_A0A396BR35	0.92	0.89	0.952	0.812	1	0.211	0.067	0.844	0.719
UniRef90_A0A396E3S1	1	1	1	0.984	1	0.789	0	0.812	0.802
UniRef90_R5MEZ1	0.986	0.967	1	1	1	0.526	0.8	1	0.793
UniRef90_R5N1I6	0.855	0.846	0.905	0.859	0.688	0.263	0.267	0.781	0.818
UniRef90_A0A174Z1D1	0.978	0.956	0.976	1	1	0.895	0	0	0.322
UniRef90_C3R2Y6	0.942	0.967	0.929	0.938	0.875	1	0	0	0.116
UniRef90_U2ISN9	1	1	1	0.938	0.938	0.684	0	0.688	0.777
UniRef90_R0CK04	0.986	1	0.976	1	1	0.947	0	1	0.843
UniRef90_A0A174XK61	0.978	0.989	0.952	1	1	0.947	0.4	0.156	0.669
UniRef90_A0A076IRH5	0.971	0.956	1	0.953	0.875	0.158	0.333	0.844	0.769
UniRef90_A0A174UG67	1	1	1	0.984	1	1	0	0.906	0.868
UniRef90_A0A396F3B0	1	0.989	1	1	0.938	0.211	0	0	0.058
UniRef90_B0P858	0.899	0.824	0.738	0.984	0.875	0.632	0.267	0.219	0.05
UniRef90_A7UZK9	0.884	0.813	0.857	0.922	0.812	0.158	0	0.531	0.05
UniRef90_A0A3E4GX70	1	0.989	1	0.984	1	1	0	0.906	0.835
UniRef90_R6CW89	0.971	0.956	1	0.969	0.875	0.632	0.6	0.844	0.81
UniRef90_C7H6Y1	0.761	0.802	0.643	1	0.938	0.579	0	0.031	0.116
UniRef90_U6RCV6	0.971	0.945	1	0.953	0.938	0.368	0.267	0.844	0.785
UniRef90_D5HH13	0.63	0.681	0.762	1	1	0	0	0.469	0.686
UniRef90_A0A076IVM9	1	0.978	1	0.969	1	0.421	1	0.844	0.843
UniRef90_R7A7S8	0.971	0.956	1	0.969	0.938	0.526	0.133	0.844	0.769
UniRef90_A0A396AE49	0.964	0.989	0.952	1	1	0.947	0	0	0
UniRef90_H1DDZ9	0.601	0.549	0.667	0.594	0.812	0.105	0	0.938	0.05
UniRef90_S0F6E1	0.971	0.956	1	0.953	0.875	0.158	0.067	0.812	0.777
UniRef90_C4Z2U3	0.971	0.956	0.929	1	1	1	0.933	1	0.669
UniRef90_R5VAP6	0.971	0.912	1	0.984	1	0.895	1	0.844	0.868
UniRef90_R5W221	0.971	0.956	1	0.953	0.875	0.579	0.333	0.844	0.826
UniRef90_A0A015ZFK4	0.92	0.857	0.905	0.875	1	0.158	0	0.938	0.099
UniRef90_D7GWV5	0.761	0.736	0.667	0.953	0.688	1	0	0	0.017
UniRef90_A6BIC0	0.761	0.934	0.833	1	0.938	1	0.8	1	0.694
UniRef90_Q9KHQ6	0.949	0.945	0.976	0.703	1	0	0	0.062	0.884
UniRef90_I8XGM3	1	0.989	1	1	1	0.263	0	0.781	0.727
UniRef90_K1FTU8	1	0.989	1	1	1	0.421	0.6	0.844	0.785
UniRef90_A6KXL2	0.971	0.945	1	0.953	0.938	0.368	0	0.844	0.81
UniRef90_C0B7X5	0.971	1	0.905	1	0.938	0.632	0	0.906	0.041
UniRef90_B0NKQ7	0.855	0.857	0.952	0.875	0.812	0.368	0	0.812	0.14
UniRef90_A0A3E4IFI0	1	0.989	1	1	0.938	0.158	0	0	0.058
UniRef90_B6W1I3	0.971	0.956	1	0.969	0.938	0.895	0.533	0.844	0.777
UniRef90_A0A015WBF1	1	0.978	1	1	1	1	0	0.844	0.793
UniRef90_D4IQJ2	1	1	1	0.984	1	0.842	0	0.906	0.818
UniRef90_A0A396C2N2	1	0.989	1	0.984	0.938	0.158	0	0	0.074
UniRef90_C0B7X1	0.928	0.901	0.857	1	0.938	0.368	0	0.281	0.033
UniRef90_R5S2B6	1	0.989	1	0.984	1	0.421	0	0.844	0.719
UniRef90_D4LWJ1	0.978	0.978	0.905	1	0.938	0.368	0	0.969	0.058
UniRef90_R6EPT0	0.971	0.945	0.952	1	0.938	1	0	0	0.008
UniRef90_A0A2N5NJQ6	0.761	0.659	0.857	0.953	0.938	0.105	0	0.562	0.132
UniRef90_A0A2X2VRZ5	1	1	1	1	1	0.947	0	1	0.917
UniRef90_A0A395VRV3	0.906	0.857	0.905	0.422	0.75	0.211	0.067	0	0.017
UniRef90_R6YQA7	0.971	0.945	1	0.969	0.938	0.842	0.667	0.844	0.826
UniRef90_R5J9Q5	0.884	0.89	0.976	0.938	0.625	0.579	0.667	0.875	0.851
UniRef90_D1PJ38	0.935	0.956	0.881	1	1	1	0.067	0.844	0.017
UniRef90_I9FHV8	0.957	0.967	1	0.969	0.938	0.263	0	0.75	0.364
UniRef90_Q5LAX0	1	0.989	1	1	1	0.316	0.267	0.844	0.785
UniRef90_A0A1C6GXE7	0.935	0.945	0.833	1	0.938	1	0.133	0.188	0.826
UniRef90_R5W667	0.971	0.945	1	0.953	0.812	0.158	0.133	0.844	0.802
UniRef90_B5CNA7	0.978	0.978	0.929	1	1	1	0	0	0
UniRef90_A0A3E4IFW9	1	0.989	1	1	0.938	0.105	0	0	0.017
UniRef90_A7V4G0	0.935	0.923	0.905	0.953	0.938	0.263	0	0.781	0.207
UniRef90_A6L7P5	0.993	0.978	1	0.969	0.938	0.474	0	0.812	0.686
UniRef90_A0A016FI57	1	1	1	0.984	1	1	0	0.906	0.793
UniRef90_A6L5I2	0.971	0.945	1	0.953	0.938	0.474	0.267	0.844	0.818
UniRef90_A0A133Y188	0.899	0.879	0.905	0.547	0.938	0.947	0	0	0.669
UniRef90_B3JL31	0.246	0.264	0.286	0.406	0.562	0.053	1	0	0.785
UniRef90_A7UYZ7	0.855	0.846	0.833	0.922	0.812	0.053	0	0.5	0.025
UniRef90_A0A174LFC4	0.971	0.967	0.929	1	1	1	0.133	0.031	0
UniRef90_B5CXI4	0.906	0.879	0.881	0.938	0.875	0.158	0	0.438	0.769
UniRef90_R6DCI9	0.978	0.945	1	0.938	0.812	0.211	0.333	0.531	0.744
UniRef90_A0A0K2HL51	0.971	0.945	1	0.953	0.875	0.263	0	0.844	0.777
UniRef90_B3JHB5	0.819	0.846	0.976	0.812	0.625	0.158	0	0.844	0.678
UniRef90_Q2RFS2	0.891	0.901	0.857	1	1	1	1	0.875	0.835
UniRef90_A0A0D8IZW9	0.964	0.934	0.857	1	0.938	0.947	0.067	0.438	0.727
UniRef90_A0A173QWR1	0.971	0.978	0.952	1	1	0.947	0	0	0.785
UniRef90_A6L7Q8	0.971	0.956	1	0.953	0.938	0.263	0.333	0.844	0.711
UniRef90_E5WY79	1	0.978	1	0.984	1	1	0	0.781	0.769
UniRef90_F7KHD1	0.971	0.989	0.952	1	1	0.947	0	0	0.595
UniRef90_S0F6D4	1	0.989	1	1	1	1	0	0.75	0.81
UniRef90_A0A174E4H8	0.957	0.956	0.952	1	0.938	0.947	0	0	0.248
UniRef90_D4JB62	0.964	0.945	0.929	1	0.938	0.895	0.067	0	0.132
UniRef90_D4RZN6	0.841	0.857	0.762	1	0.875	1	0.933	0.25	0
UniRef90_R6CIY6	0.971	0.945	1	0.953	0.875	0.579	0	0.844	0.835
UniRef90_Q64RV7	1	0.989	1	1	0.938	0.158	0	0	0.058
UniRef90_A0A380ZLL1	0.826	0.769	0.929	0.844	0.562	0.158	0	0.75	0.446
UniRef90_A9KJH0	0.964	0.912	0.881	1	1	1	0.8	0.781	0.694
UniRef90_A0A0K2HQB2	0.971	0.956	1	0.953	0.875	0.263	0.267	0.844	0.818
UniRef90_A0A174EIN5	0.986	1	0.952	1	1	0.474	0	1	0.058
UniRef90_U2KW29	0.87	0.956	0.857	1	1	0.947	0	0	0.628
UniRef90_U6RJ00	0.971	0.945	1	0.953	0.938	0.421	0.067	0.844	0.76
UniRef90_F7LF68	1	0.989	1	1	0.938	0.316	0	0.812	0.694
UniRef90_A0A076J735	0.986	0.967	1	0.969	1	0.474	0.733	0.844	0.785
UniRef90_C0FQ15	0.986	0.967	0.881	1	1	1	1	0	0.041
UniRef90_A6L585	0.971	0.956	1	0.969	0.875	0.579	0.533	0.844	0.76
UniRef90_E2ZGF7	0.638	0.451	0.452	1	0.875	0.368	0.067	0.125	0.182
UniRef90_A0A3E4IFX0	1	0.978	1	1	0.938	0.211	0	0	0.074
UniRef90_A0A3E5DM19	0.935	0.934	0.905	0.859	0.938	1	0	0	0.686
UniRef90_G2SYZ3	0.884	0.923	0.81	1	0.812	0.947	0.867	0.094	0
UniRef90_E4W393	0.986	0.967	1	0.953	0.875	0.158	0.067	0	0.008
UniRef90_G2T0G7	0.942	0.945	0.881	1	1	0.947	0	0	0.058
UniRef90_A0A174JV83	0.928	0.89	0.952	0.594	0.875	0	0	0.094	0.19
UniRef90_D4M0W3	0.899	0.868	0.786	1	1	0.895	0.133	0	0.058
UniRef90_A5ZT60	0.826	0.648	0.643	1	1	0.211	0	0.062	0
UniRef90_K9E0F3	0.986	0.956	1	0.984	0.938	0.211	0.2	0.844	0.744
UniRef90_R7A3V8	0.971	0.945	1	0.953	0.812	0.474	0	0.844	0.818
UniRef90_B5CLP5	0.986	0.989	1	1	1	1	0.6	0.906	0.777
UniRef90_D4JT21	0.957	0.945	0.929	1	0.938	0.789	0	0	0.008
UniRef90_R6YYK5	0.971	0.956	1	0.953	0.875	0.368	0.2	0.844	0.81
UniRef90_A0A176U3T4	0.536	0.549	0.619	0.984	0.75	0.105	0	0.031	0
UniRef90_F7K0A9	0.87	0.813	0.81	0.938	0.938	0.579	0	0	0
UniRef90_A0A173V9E1	0.87	0.846	0.786	0.984	0.812	0.895	0.933	0.125	0.017
UniRef90_G5SL06	0.826	0.835	0.929	0.828	0.812	0.947	0	0.062	0.694
UniRef90_D1JU46	1	0.989	1	0.984	1	0.842	0	0.781	0.81
UniRef90_C4ZBS3	1	1	0.952	1	1	1	1	1	0.727
UniRef90_A0A396B9J2	0.942	0.901	0.952	0.938	0.75	0.105	0	0.781	0.314
UniRef90_A0A0K2HGC7	1	1	1	0.984	1	1	0	0.781	0.802
UniRef90_C4Z5E3	0.942	0.934	0.833	1	1	1	0.933	0.656	0.603
UniRef90_A0A395US25	0.971	0.956	1	0.953	0.875	0.158	0	0.844	0.719
UniRef90_R5VS54	0.826	0.824	0.929	0.828	0.625	0.105	0	0.812	0.645
UniRef90_R6YIF8	0.899	0.879	0.881	0.922	0.812	0.263	0.733	0.438	0.777
UniRef90_C4ZB99	0.957	0.967	0.905	1	0.938	1	1	1	0.364
UniRef90_A6L2W9	0.971	0.945	1	0.953	0.875	0.211	0	0.844	0.686
UniRef90_A0A396E1H1	0.87	0.78	0.786	0.781	0.938	0.368	0	0.812	0.124
UniRef90_A0A174Z407	0.971	0.989	0.952	1	1	0.947	0	0.781	0.669
UniRef90_C4ZD94	0.87	0.835	0.857	0.984	0.938	1	0.267	0.062	0
UniRef90_D4L1Z3	0.993	1	1	1	1	0.947	0.8	0.188	0.669
UniRef90_A8SVC3	0.986	1	0.952	1	1	0.526	0	0.938	0.041
UniRef90_B0NKQ6	0.848	0.868	0.952	0.875	0.812	0.316	0	0.812	0.116
UniRef90_D4JXU6	0.935	0.901	0.857	1	0.938	0.842	0.133	0	0
UniRef90_C3RAS0	0.971	0.945	1	0.953	0.875	0.158	0	0.844	0.62
UniRef90_B6FKK1	0.949	0.912	0.833	1	1	0.789	0	1	0
UniRef90_K6A0H4	0.964	0.945	1	0.844	1	0.684	0	0.562	0.595
UniRef90_A5ZNP0	0.681	0.549	0.69	0.938	0.938	0.947	0	1	0.562
UniRef90_A0A078R3T2	0.906	0.879	0.976	0.953	0.812	0.211	0	0.844	0
UniRef90_C7H6X8	0.667	0.725	0.524	0.781	0.812	0.053	0	1	0.14
UniRef90_C7H7K4	1	0.989	0.952	1	1	0.947	0.067	1	0.95
UniRef90_UPI0003B4B9B1	0.971	0.967	0.905	1	1	0.895	0	1	0.711
UniRef90_E2ZN31	0.971	0.978	0.929	1	0.938	0.158	0	0	0
UniRef90_A0A076J1F4	0.971	0.956	1	0.953	0.875	0.263	0	0.844	0.76
UniRef90_D4V4N2	0.971	0.945	1	0.953	0.938	0.211	0	0.844	0.752
UniRef90_F0R8V8	0.101	0.121	0.048	0.25	0.375	0.158	0.933	0.031	0.843
UniRef90_A7AZM6	0.986	0.989	1	1	0.938	0.947	0	0	0.347
UniRef90_D4LY41	0.986	0.989	0.952	1	1	1	0	0	0
UniRef90_C4ZFG5	0.928	0.912	0.905	1	1	1	1	0	0.017
UniRef90_R5YB14	0.841	0.879	0.833	1	0.812	0.737	0.6	0.75	0.033
UniRef90_C6GFR2	0.87	0.835	0.857	0.547	1	0.947	0	0	0.587
UniRef90_Q9KHQ1	0.964	0.956	1	0.859	1	0	0	0.594	0.876
UniRef90_C7G920	0.942	0.934	0.857	1	1	0.947	0.6	0	0
UniRef90_E1Z1J4	1	0.978	1	0.984	0.875	0.842	0	0.812	0.769
UniRef90_A5Z5I8	0.986	0.978	0.929	1	1	0.579	0	1	0.24
UniRef90_A0A076IP18	0.971	0.945	1	0.953	0.938	0.316	0.067	0.844	0.769
UniRef90_A0A329U187	0.942	0.934	0.857	1	0.938	0.421	0	0.5	0
UniRef90_R5J6I6	1	0.989	1	1	1	0.368	0.4	0.812	0.793
UniRef90_A8S882	0.92	0.956	0.81	1	0.875	0.895	0	0	0.041
UniRef90_A0A135YTH6	0.993	0.956	0.952	1	1	1	1	0	0.041
UniRef90_D4KAU1	0.906	0.879	0.857	1	1	0.632	0	0.562	0
UniRef90_A6L3E7	0.971	0.945	1	0.953	0.938	0.368	0.533	0.844	0.777
UniRef90_A0A0M6WYX6	0.935	0.934	0.881	1	1	0.842	0	0	0
UniRef90_A0A2A6ZAF7	0.884	0.945	0.857	1	0.875	0.947	0	1	0.711
UniRef90_D4JTZ7	0.957	0.934	0.905	1	0.938	0.947	0.133	0.031	0.24
UniRef90_G5SL22	0.949	0.923	1	0.953	1	0.947	0	0.031	0.727
UniRef90_F3QY18	0.514	0.582	0.548	0.719	0.75	0.316	1	0.125	0.802
UniRef90_D1PJZ7	0.862	0.857	0.857	1	0.875	0.789	0	0	0.008
UniRef90_C4Z731	1	0.989	1	1	1	0.947	0	0.5	0.686
UniRef90_R7J8P5	1	0.989	1	1	1	0.789	0.8	0.844	0.826
UniRef90_E2SL22	0.928	0.945	0.952	1	1	0.947	0	0	0.182
UniRef90_A0A174ES80	1	0.989	1	0.969	1	0.895	0	0.875	0.818
UniRef90_I9U2S1	0.87	0.857	0.905	0.828	0.812	0	0	0	0
UniRef90_A0A3E5A2K3	0.812	0.692	0.69	0.984	0.938	0.895	0	0	0.008
UniRef90_U2DQ57	1	0.989	1	0.984	0.938	0.316	0.067	0.688	0.686
UniRef90_B0PDH4	0.906	0.923	0.905	1	1	0.842	0.133	0.969	0.669
UniRef90_A0A329USW5	0.797	0.714	0.667	0.984	0.875	0.947	0	0	0
UniRef90_C7H8P3	0.891	0.923	0.833	1	0.938	0.947	0.067	0	0.008
UniRef90_C0CTQ4	0.812	0.813	0.786	1	0.875	1	0.667	0.875	0.231
UniRef90_D4KYI8	0.971	0.967	0.905	1	1	1	1	0	0.033
UniRef90_A0A174U4T9	0.928	0.901	0.952	0.891	0.812	0.158	0	0	0.347
UniRef90_A6L5E5	0.978	0.989	1	0.969	0.938	0.789	1	0.938	0.835
UniRef90_R6C6P5	0.145	0.176	0.19	0.406	0.562	0.526	0	0.938	0.843
UniRef90_D4IQJ1	1	1	1	0.984	0.938	0.947	0	0.875	0.785
UniRef90_F0R4X6	0.587	0.56	0.524	0.719	0.938	0.053	0	0	0.777
UniRef90_A0A396AIU2	0.942	0.934	0.833	1	0.875	0.105	0	0	0
UniRef90_C7H2A6	0.384	0.582	0.595	0.922	0.938	0	0	0.344	0.777
UniRef90_A6LFQ4	1	0.989	1	1	1	0.579	1	0.875	0.818
UniRef90_T4C374	0.971	0.945	0.929	1	1	1	0	0.406	0.959
UniRef90_A0A396FMH1	0.899	0.934	0.857	1	0.875	0.895	0.933	0.25	0.306
UniRef90_R9HTU6	0.87	0.835	0.857	0.969	0.875	0.316	0	0.531	0.066
UniRef90_C0FQ82	0.746	0.692	0.667	0.969	0.625	1	0.067	0.094	0
UniRef90_U6RAH3	0.986	0.956	1	0.906	0.875	0.211	0.133	0.812	0.612
UniRef90_A0A396AK82	0.841	0.846	0.952	0.859	0.625	0.158	0	0.844	0
UniRef90_K9E707	0.884	0.802	0.929	0.781	0.938	0.105	0	0.562	0.868
UniRef90_A0A174H8K5	0.949	0.978	0.905	1	0.938	0.895	0	0.938	0.438
UniRef90_K6A127	0.913	0.945	0.976	0.984	1	0.526	0	0.156	0.62
UniRef90_I3YIY6	1	0.978	1	1	1	0.947	0	0.406	0.645
UniRef90_A0A173VS15	0.804	0.747	0.667	0.969	0.875	0.789	0.467	0	0
UniRef90_A0A015V6F7	0.862	0.868	0.905	0.781	0.812	0	0	0	0
UniRef90_D4KTF5	0.957	0.978	0.905	1	1	1	1	0.75	0.628
UniRef90_A0A3E4V6K6	0.964	0.934	0.905	1	1	0.737	0	0	0.256
UniRef90_A0A015YJI0	1	1	1	0.984	1	1	0	0.812	0.793
UniRef90_A6L5J9	0.971	0.945	1	0.953	0.875	0.579	0.467	0.844	0.76
UniRef90_D4K8L8	0.971	0.989	0.952	1	1	0.947	0.067	0	0
UniRef90_A9KMW6	0.971	0.945	0.976	1	1	1	1	1	0.653
UniRef90_D4K6N1	0.862	0.901	0.881	1	0.938	0.105	0	0.219	0.835
UniRef90_D4VEF8	1	0.989	1	1	1	0.579	0.533	0.844	0.851
UniRef90_A0A174EF60	0.717	0.681	0.667	0.984	0.75	1	0.267	0	0.008
UniRef90_G2XL12	0.942	0.868	0.976	0.859	0.562	0.263	0	0.719	0.802
UniRef90_A7AE97	0.92	0.901	0.905	0.953	0.938	0.211	0	0.031	0.017
UniRef90_A6L3G7	0.964	0.945	1	0.953	0.938	0.474	0.467	0.812	0.736
UniRef90_A0A3A5SAF1	0.986	0.978	0.976	0.812	0.938	0.211	0	0.5	0.843
UniRef90_A7V130	1	0.989	1	1	1	0.211	0.2	0.938	0.76
UniRef90_A0A395UN55	0.572	0.538	0.548	0.656	0.938	0.053	0	0	0.793
UniRef90_A0A3E5ED92	0.87	0.846	0.905	0.844	0.812	0	0	0	0
UniRef90_A6L4U5	0.986	0.978	1	0.969	0.875	0.368	0	0.844	0.694
UniRef90_Q56VF7	0.884	0.879	0.905	0.844	0.875	0.684	0	0	0.711
UniRef90_A0A3E2VXQ2	0.899	0.912	0.905	1	0.875	0.632	0	0.969	0.38
UniRef90_C7H6X7	0.681	0.802	0.571	0.828	0.812	0.105	0.067	1	0.669
UniRef90_A0A134CL89	0.942	0.978	0.952	1	1	1	0	0.125	0.752
UniRef90_F4XER8	0.913	0.923	0.881	1	0.938	0.842	0.6	0	0.025
UniRef90_D4JTZ5	0.986	0.989	1	1	0.938	0.947	0	0	0.24
UniRef90_I9RD05	0.906	0.89	0.976	0.969	1	0.947	0.333	0.844	0.653
UniRef90_A8RVD6	0.978	0.967	1	1	1	0.947	0.067	0.031	0.661
UniRef90_A0A396GFV9	0.993	0.978	0.905	0.984	1	0.947	0	1	0.727
UniRef90_D4CBT3	0.862	0.89	0.833	1	0.938	0.789	0	0	0
UniRef90_A6L686	0.971	0.956	1	0.953	0.938	0.211	0	0.812	0.769
UniRef90_R9HNH3	1	1	1	1	0.938	1	0	0.844	0.752
UniRef90_A0A176U4A7	0.862	0.89	0.929	0.984	1	0.684	0.067	0.281	0.57
UniRef90_B5CKQ6	0.971	0.967	0.952	1	1	0.947	0.4	0	0.058
UniRef90_A0A0U1CN12	0.87	0.78	0.119	0.938	0.938	0.105	0	0.938	0.033
UniRef90_A0A2A7ALX5	0.942	0.956	0.833	1	0.875	0.895	0	0	0.008
UniRef90_Q64ZS4	1	0.989	1	0.984	1	0.263	0.067	0.812	0.752
UniRef90_S0F753	0.986	0.967	1	0.953	1	0.316	0.267	0.844	0.785
UniRef90_A0A346FUW7	1	0.967	1	1	1	1	0	0.312	0.967
UniRef90_A0A0A2FLK3	0.942	0.945	1	0.953	0.938	0.842	0	0	0.355
UniRef90_A0A134BBD5	0.993	1	1	0.938	1	1	0	0.344	0.826
UniRef90_A0A174E815	0.877	0.89	0.952	1	1	0.842	0	0.125	0.537
UniRef90_A0A173ZUR1	0.957	0.967	0.881	1	0.938	1	0.467	0.219	0
UniRef90_E5X3T8	0.928	0.912	0.952	0.953	0.875	0.211	0	0	0
UniRef90_D4L1G6	0.92	0.912	0.786	1	0.938	0.947	1	0.875	0.273
UniRef90_C4ZBT1	0.942	0.967	0.905	1	1	0.947	0.867	0.812	0.471
UniRef90_B5D1Q5	0.833	0.846	0.929	0.844	0.688	0.105	0.533	0.688	0.752
UniRef90_A0A173W0R5	1	0.989	1	1	1	0.316	0.133	0.719	0.727
UniRef90_A0A395YXK2	1	0.989	1	0.984	1	1	0	0.875	0.802
UniRef90_A0A174N272	0.819	0.791	0.762	1	0.938	0.474	0.067	0.094	0
UniRef90_B5CVT0	0.957	0.945	0.976	0.953	0.812	0.211	0.067	0.688	0.793
UniRef90_B0PDG5	1	0.978	1	1	1	0.895	0	0.969	0.777
UniRef90_B6FSS6	1	1	1	1	1	1	1	1	0.686
UniRef90_A0A015S1R6	0.906	0.791	0.714	0.969	0.938	0.105	0	0.531	0.165
UniRef90_W1I2X5	0.732	0.714	0.69	0.969	0.875	0.842	0	0	0.851
UniRef90_A4EB57	0.674	0.714	0.714	0.984	0.812	1	1	0.938	0.81
UniRef90_A0A174SJS0	0.812	0.78	0.786	1	0.938	1	0.333	0.094	0.711
UniRef90_D1KAJ0	0.971	0.956	1	0.953	1	0.263	0	0.812	0.074
UniRef90_W0FML8	0.92	0.934	0.881	0.953	0.875	1	1	0.906	0.793
UniRef90_R9HWQ8	1	0.989	1	0.984	1	0.842	0	0.875	0.777
UniRef90_A0A395VCF6	0.884	0.912	0.881	1	0.938	0.842	0	0	0.388
UniRef90_W1I1B5	0.949	0.923	1	0.703	1	0	0	0.062	0.876
UniRef90_B6W4E8	0.957	0.956	1	0.938	0.938	0.316	0	0.812	0.322
UniRef90_D4JD89	0.949	0.923	0.833	1	1	0.053	0	0	0
UniRef90_A0A3E5DVA8	1	0.989	1	0.984	1	1	0	0.938	0.843
UniRef90_C4ZD95	0.833	0.857	0.905	1	0.938	1	0.533	0.344	0.306
UniRef90_A0A396FW04	0.587	0.648	0.667	0.906	0.812	0.579	0.133	0	0.05
UniRef90_A0A395VR90	0.681	0.758	0.905	0.766	0.875	0.789	0	0	0.479
UniRef90_A0A1C5VEM4	0.601	0.593	0.452	0.891	0.75	0.947	0.133	0.594	0.017
UniRef90_B0GAD4	0.862	0.846	0.81	1	1	0.895	0.333	0	0.099
UniRef90_A0A346FW62	0.833	0.901	0.833	0.984	0.938	0.947	0.733	1	0.686
UniRef90_A5KP19	0.899	0.824	0.833	1	1	1	0.467	1	0.719
UniRef90_E1KN21	1	1	1	0.984	1	1	0	0.938	0.793
UniRef90_A0A0P0LFD2	0.971	0.956	1	0.953	0.812	0.368	0.467	0.906	0.727
UniRef90_I9IGS0	0.891	0.846	0.905	0.453	0.688	0.263	0	0	0.025
UniRef90_A0A0J1IZ44	0.884	0.879	0.714	1	1	0.158	0	1	0.116
UniRef90_A0A3E5GY35	0.884	0.912	0.976	0.562	0.875	0	0	0.031	0.802
UniRef90_A0A397WEZ6	0.935	0.945	0.952	0.969	0.938	0.158	0	0.719	0.802
UniRef90_D4JXT5	0.92	0.934	0.857	1	0.938	0.947	1	0	0.041
UniRef90_A0A173SUT5	0.993	1	0.952	1	0.938	0.526	0	0.875	0.066
UniRef90_A0A3E2XRZ3	0.833	0.89	0.833	0.984	0.938	0.947	0.533	0.156	0.107
UniRef90_B0NQA3	0.986	0.956	0.952	1	0.875	0.263	0	0.031	0.008
UniRef90_D4IQJ0	1	1	1	1	1	1	0	0.875	0.727
UniRef90_R6CPE5	0.971	0.956	1	0.953	0.812	0.737	0.267	0.844	0.76
UniRef90_C3R2Z9	0.986	1	1	0.969	1	0.632	0	0.688	0.711
UniRef90_C3R255	1	1	1	0.984	0.875	1	0	0.844	0.843
UniRef90_A0A2A7AHV1	0.768	0.912	0.762	1	0.938	0.895	0	0	0.008
UniRef90_B0NE07	0.993	0.967	0.976	1	1	0.632	0	0	0
UniRef90_A0A017NEQ8	0.862	0.791	0.952	0.812	0.938	0.053	0	0.562	0.868
UniRef90_Q650G5	1	0.989	1	0.984	1	0.947	0	0.844	0.802
UniRef90_A0A365NYG0	0.616	0.549	0.714	1	1	0	0	0.625	0.76
UniRef90_A0A136WGK3	0.971	0.989	0.976	1	1	0.684	0	0.219	0.653
UniRef90_B0N9J2	0.891	0.89	0.833	1	0.938	1	0	0.938	0.736
UniRef90_D4KUJ4	0.92	0.945	0.881	1	0.875	0.895	0.933	1	0.149
UniRef90_A0A1Y3RCS7	0.957	0.956	0.905	1	0.938	1	1	0.938	0.893
UniRef90_A0A395ZJH8	0.913	0.945	0.881	1	0.938	1	1	1	0.603
UniRef90_D4JD50	0.507	0.516	0.5	0.891	0.938	0.789	0	0	0.041
UniRef90_R5JME6	1	1	1	1	1	0.368	0	0.844	0.736
UniRef90_A0A395UJU2	1	1	1	0.969	1	0.789	0	0.469	0.752
UniRef90_A5KRK4	0.92	0.945	0.905	1	0.875	1	1	1	0.934
UniRef90_C7H225	0.877	0.868	0.714	1	0.875	0.947	0.067	0	0
UniRef90_D4JXQ0	0.928	0.912	0.857	1	0.938	0.947	0.667	0	0.025
UniRef90_A0A374N425	0.891	0.879	0.905	0.531	0.938	1	0	0	0.628
UniRef90_A0A3E4I387	0.928	0.923	0.929	0.797	0.875	0.684	0	0.5	0.116
UniRef90_B0MUH2	0.565	0.538	0.524	0.672	0.938	0.053	0	0	0.793
UniRef90_H3KE16	0.457	0.516	0.405	0.703	0.812	0.947	1	0.125	0.711
UniRef90_A0A0M6WF30	0.87	0.879	0.786	0.953	0.812	0.684	0	0	0
UniRef90_F4XHW2	0.928	0.901	0.881	1	0.938	0.947	0.4	0	0.149
UniRef90_A7V4H6	0.964	0.912	0.952	0.969	0.875	0.421	0	0.719	0.066
UniRef90_D4L1Z7	0.957	0.978	0.976	1	0.938	0.421	0	0	0
UniRef90_A7V2D0	0.804	0.769	0.738	0.922	0.812	0.053	0	0.406	0.025
UniRef90_D4LY55	0.507	0.637	0.595	1	1	0	0	0.125	0.545
UniRef90_B0B4B4	0.964	0.945	0.952	1	1	1	0	0.812	0.926
UniRef90_D6DJM0	0.877	0.89	0.881	0.984	1	0.053	0	0.219	0.603
UniRef90_Q8A1F7	1	0.989	1	1	1	0.316	0	0.844	0.719
UniRef90_C0BDJ2	0.935	0.945	0.857	1	0.938	0.684	0	0	0
UniRef90_R7A2D0	0.833	0.835	0.929	0.828	0.625	0.263	0.267	0.75	0.785
UniRef90_A0A0P0M182	1	0.989	1	0.984	0.938	0.263	0	0.812	0.025
UniRef90_A0A015V6C9	0.855	0.846	0.905	0.828	0.75	0.053	0	0	0
UniRef90_C4ZHX4	0.848	0.857	0.762	0.953	0.938	0.842	0	0	0.017
UniRef90_A7AE90	0.928	0.901	0.905	0.969	0.938	0.211	0	0.031	0.025
UniRef90_D6DZU4	0.913	0.967	0.905	1	1	0.947	0.933	0.781	0.124
UniRef90_E4MBE6	0.906	0.879	0.81	0.984	0.938	0.211	0.867	1	0.752
UniRef90_D4LFQ4	0.87	0.824	0.857	1	1	0.947	0.267	0	0.008
UniRef90_A5ZYV7	0.659	0.67	0.595	0.969	0.75	0.895	0.867	1	0.736
UniRef90_D4L499	0.877	0.813	0.81	1	0.875	0.947	0.533	0.812	0.636
UniRef90_D4KV22	0.536	0.758	0.643	1	1	0.053	0	0.438	0.802
UniRef90_A6NXP0	0.935	0.934	0.881	1	0.938	0.947	1	0	0.107
UniRef90_C4ZBD4	0.899	0.912	0.833	1	0.812	0.684	0.333	0.312	0
UniRef90_C0B8K0	0.942	0.945	0.857	1	0.938	1	1	0.938	0.124
UniRef90_D4JBN5	0.942	0.978	0.857	1	0.938	0.421	0.133	0	0.008
UniRef90_G4T4R8	0.92	0.901	0.952	1	0.938	0.842	0	0.031	0
UniRef90_A7VY07	0.964	0.967	0.929	1	0.938	0.895	0	0	0.008
UniRef90_A0A174B5P9	0.703	0.703	0.595	0.984	0.812	0.579	0	0	0
UniRef90_R6SP90	0.87	0.89	0.762	1	0.875	0.947	0	0	0
UniRef90_R5MCK3	0.986	0.989	1	0.938	0.875	0.895	0.533	0.969	0.851
UniRef90_R5NYG9	0.899	0.879	0.833	1	0.938	1	0.867	0.094	0.132
UniRef90_A0A139LMC3	1	0.989	1	0.969	1	0.789	0	0.906	0.81
UniRef90_A0A173ZXA8	0.942	0.945	0.857	1	0.875	0.947	1	1	0.124
UniRef90_P10952	0.993	1	0.976	1	1	1	0	1	1
UniRef90_A8SH95	0.761	0.846	0.667	0.969	0.875	0.895	0	0	0.017
UniRef90_Q8A491	1	0.989	1	1	1	0.474	0.533	0.844	0.719
UniRef90_Q8A8R2	0.986	0.956	0.952	1	0.938	0.263	0	0.062	0.008
UniRef90_G5SS34	0.993	0.967	1	1	1	0.316	0.2	0.625	0.793
UniRef90_A6KYK2	1	0.989	1	1	1	0.842	0.867	0.844	0.802
UniRef90_C4Z7V9	0.717	0.692	0.643	0.953	0.625	0.947	0	0	0
UniRef90_Q8A473	0.935	0.945	0.952	0.953	1	0.316	0.933	0.562	0.744
UniRef90_D4KUS1	0.942	0.978	0.905	1	0.875	0.789	0	0	0
UniRef90_A0A329U594	0.616	0.725	0.69	0.984	0.812	1	0.133	0.094	0
UniRef90_R5C3D9	1	0.989	1	1	1	0.579	0	0.844	0.736
UniRef90_E0S269	0.949	0.945	0.857	1	0.875	1	1	0.844	0
UniRef90_W0ERH4	0.572	0.549	0.524	0.672	0.938	0.053	0	0	0.744
UniRef90_A0A174CF54	0.891	0.857	0.81	1	0.875	0.947	0	0	0
UniRef90_J7TNS4	0.225	0.374	0.262	0.719	0.75	0.895	1	0.75	0.537
UniRef90_A0A2U2ECQ4	0.935	0.912	0.857	1	0.938	0.947	0	0	0
UniRef90_A0A0P0M2Y9	0.986	0.956	0.952	1	0.938	0.211	0	0.062	0.008
UniRef90_S0F522	0.971	0.945	1	0.953	0.812	0.263	0	0.844	0.727
UniRef90_A8ST08	0.775	0.297	0.167	1	1	0.789	0	0.969	0
UniRef90_C7GI03	0.986	0.989	1	1	1	0.263	0	0.031	0
UniRef90_K6ADG5	0.964	0.945	1	0.953	1	0.737	0	0.094	0.736
UniRef90_S0FAP6	0.971	0.945	1	0.953	0.812	0.316	0.067	0.812	0.802
UniRef90_S0F6F0	0.899	0.912	0.952	0.844	0.812	0.579	0	0	0.694
UniRef90_C4ZBX9	0.884	0.912	0.81	1	0.938	0.842	0	0.594	0.587
UniRef90_A0A1Q6HB63	1	0.989	1	1	1	0.421	0.133	0.844	0.661
UniRef90_G1UMM8	0.797	0.747	0.905	0.266	0.25	0.053	0	0.344	0.595
UniRef90_E4VT64	0.652	0.593	0.69	0.641	0.938	0.105	0	0.906	0.05
UniRef90_C4Z954	0.957	0.945	0.905	1	0.938	1	1	1	0.215
UniRef90_A6KYI4	0.971	0.956	1	0.953	0.875	0.158	0.2	0.812	0.744
UniRef90_C4Z297	0.92	0.956	0.881	1	0.938	1	0.933	0	0.488
UniRef90_U2BWN4	0.993	0.967	0.976	1	1	1	0	0.844	0.983
UniRef90_F7KIU0	0.928	0.967	0.929	1	1	0.947	0	0.062	0.686
UniRef90_C7H8T6	0.913	0.901	0.833	0.984	0.938	0.947	0	0	0.017
UniRef90_A8S9W7	0.848	0.89	0.714	1	0.875	1	0	0	0
UniRef90_A0A2A6ZB40	0.862	0.967	0.929	1	1	1	0.667	0.156	0.545
UniRef90_A0A174IF97	0.891	0.857	0.833	0.953	0.812	0.158	0	0.781	0.107
UniRef90_U5CJ10	0.899	0.846	0.881	0.906	0.875	0.263	0	0.781	0.372
UniRef90_A0A174C1Q1	0.971	1	0.976	1	1	0.684	0	0.156	0.81
UniRef90_G2SWP4	0.92	0.912	0.857	1	0.812	0.895	0	0	0
UniRef90_A0A395UYP8	0.913	0.923	0.833	1	0.875	0.789	0.4	0	0.05
UniRef90_B0NU50	0.906	0.945	0.976	0.969	0.688	0.158	0.067	0.812	0.025
UniRef90_A6KWR4	0.978	0.945	1	0.984	0.938	0.158	0	0.781	0.661
UniRef90_D4LNK5	0.928	0.923	0.881	1	0.938	1	0	0.469	0.008
UniRef90_A0A173RQY0	0.949	0.923	0.905	1	0.875	1	1	1	0.273
UniRef90_A0A173T023	0.804	0.835	0.786	0.969	0.875	0.421	0.8	0.188	0.132
UniRef90_Q64RV1	0.993	0.978	1	0.984	0.875	0.211	0	0.094	0.083
UniRef90_R7R1N4	0.906	0.857	0.81	1	0.938	1	1	0.938	0.025
UniRef90_A0A0M6WHS8	0.797	0.791	0.738	0.984	0.75	0.474	0.067	0	0
UniRef90_A0A0M6WKN7	0.855	0.813	0.762	1	0.938	0.842	0	0.156	0.05
UniRef90_C7XG97	0.993	0.978	1	1	1	0.842	0.4	1	0.893
UniRef90_A0A395V2K0	0.841	0.879	0.81	1	0.75	0.789	0	0	0
UniRef90_D5HDH9	0.957	0.923	0.905	1	0.938	1	1	0.625	0
UniRef90_A0A0M6WTL0	0.739	0.637	0.571	0.953	0.75	0.947	0	0	0.008
UniRef90_A0A174CFF5	0.92	0.901	0.857	1	0.938	0.895	0.733	0	0.058
UniRef90_A0A0M6WDC4	0.906	0.945	0.857	1	0.875	0.842	0.8	0.969	0.107
UniRef90_C4ZBT4	0.942	0.901	0.881	0.969	0.875	0.947	0.333	0.094	0.017
UniRef90_A6NXN1	0.928	0.912	0.881	1	0.938	0.842	0.067	0	0
UniRef90_D4L195	0.855	0.923	0.833	0.984	0.938	0.368	0.667	0.125	0
UniRef90_D4LFP4	0.768	0.714	0.643	1	0.875	0.579	0	0	0
UniRef90_A8SSF3	0.92	0.912	0.857	1	0.875	0.947	1	0.438	0.008
UniRef90_R9I0V2	0.957	0.945	0.976	0.984	0.875	0.421	0	0.812	0.521
UniRef90_R5Z5I5	0.935	0.923	0.857	1	0.812	0.947	0.2	0.281	0
UniRef90_R5YCI3	0.87	0.89	0.857	0.984	0.812	0.789	0.4	0.562	0.083
UniRef90_A0A3E2SUK6	0.884	0.879	0.81	1	0.875	0.947	0	0	0
UniRef90_A0A174TQZ1	0.993	0.978	1	1	1	0.947	0	0.469	0.554
UniRef90_C0B7D5	0.942	0.945	0.881	1	0.938	0.895	0	0.062	0
UniRef90_R5K610	1	0.989	1	1	1	0.316	0.2	0.844	0.711
UniRef90_F9DJL5	0.855	0.835	0.857	0.484	0.938	0.947	0	0	0.62
UniRef90_B3JJ46	0.971	0.956	0.929	0.891	0.938	0.947	0	0.781	0.736
UniRef90_D4LPV8	0.935	0.956	0.81	1	0.938	0.947	0	0	0
UniRef90_C4ZI84	0.949	0.956	0.857	1	1	0.895	0.933	1	0.57
UniRef90_A7ALV5	0.884	0.824	0.905	0.844	0.75	0.053	0	0	0
UniRef90_A0A396FBT8	0.87	0.912	0.738	0.969	0.812	0.474	0	0	0
UniRef90_C4Z8W1	0.884	0.912	0.833	1	0.812	0.789	0.4	0.531	0.017
UniRef90_C7H6Y3	0.855	0.879	0.81	1	1	0.579	0	0.969	0.744
UniRef90_A0A380YWJ9	0.819	0.857	0.738	0.828	0.75	0.211	1	0.75	0.438
UniRef90_E1KPS5	0.775	0.67	0.643	0.594	0.938	0.105	0	0	0.124
UniRef90_R5JSR8	1	0.989	1	1	1	0.316	0.2	0.844	0.777
UniRef90_A5ZSB4	0.29	0.198	0.095	0.922	0.625	0.053	0	0	0.008
UniRef90_A0A173VFH2	0.717	0.747	0.714	0.969	0.812	0.316	0	0	0
UniRef90_A0A395ZDE2	0.855	0.912	0.857	1	0.812	0.684	0	0	0
UniRef90_A0A1H4FHD8	0.848	0.813	0.81	0.719	0.938	0.211	0	0.844	0.603
UniRef90_F4XHI2	0.92	0.901	0.881	1	0.875	0.842	0.8	0.062	0
UniRef90_Q5L8Z8	1	0.989	1	1	1	0.421	0.6	0.844	0.686
UniRef90_A0A174IFE2	0.754	0.758	0.786	0.766	0.938	0.947	0	0.281	0.777
UniRef90_R6JK25	1	0.989	1	1	1	0.263	0	0	0.008
UniRef90_A6BF00	0.652	0.692	0.619	0.984	0.812	0.632	0	0	0
UniRef90_D4JXQ5	0.928	0.923	0.833	1	0.938	0.947	0.733	0	0.05
UniRef90_A0A367FWE7	0.435	0.582	0.667	0.859	1	0	0	0.406	0.678
UniRef90_U2EZN8	0.435	0.582	0.5	0.953	0.75	0.684	0.4	0.125	0.702
UniRef90_A0A174E050	0.942	0.956	0.786	1	1	0.263	0	0.875	0
UniRef90_R9HXJ2	1	0.989	1	0.984	1	0.842	0	0.844	0.785
UniRef90_A6NW75	0.978	1	0.952	1	1	0.579	0	0.062	0.802
UniRef90_E2ZLP5	0.906	0.879	0.833	1	0.875	0.474	0	0	0.017
UniRef90_A0A1C5Z857	0.949	0.989	0.976	0.938	0.75	1	1	0.969	0.86
UniRef90_E5UU61	0.986	0.978	1	0.984	0.938	0.158	0	0.812	0.008
UniRef90_C7H1C9	0.928	0.912	0.786	1	0.938	1	0	0.156	0.347
UniRef90_C4ZBS6	0.928	0.945	0.857	1	0.875	0.895	0.8	0.5	0.033
UniRef90_B3JHG6	0.138	0.132	0.19	0.469	0.562	0.684	0.933	0.188	0.826
UniRef90_C4ZBT7	0.92	0.956	0.881	1	1	0.947	0.8	0.938	0.314
UniRef90_D4LFQ1	0.87	0.824	0.833	1	1	0.947	0.4	0	0.182
UniRef90_D4KY97	0.92	0.923	0.881	1	0.875	0.842	0.667	0.562	0.008
UniRef90_Q8A155	1	0.989	1	1	1	0.263	0	0.844	0.612
UniRef90_A0A1T4XM19	0.587	0.725	0.571	0.953	0.688	0.632	0	0.438	0.595
UniRef90_D4JA54	0.529	0.593	0.524	0.922	0.875	0.789	0	0	0.033
UniRef90_D4LFS2	0.862	0.835	0.762	1	0.938	0.632	0	0	0
UniRef90_F4XHQ7	0.79	0.824	0.667	0.922	0.688	0.263	0	0	0
UniRef90_D7K7P3	0.993	0.934	1	1	1	0.211	0	0.812	0.537
UniRef90_A0A329UR27	0.746	0.648	0.667	0.969	0.875	0.474	0	0	0
UniRef90_C4ZBT9	0.884	0.846	0.81	1	0.75	0.737	0.267	0.531	0
UniRef90_R5Z8H1	0.891	0.912	0.857	1	0.812	0.737	0.8	0.469	0
UniRef90_A0A014AUH4	0.978	0.989	1	1	0.938	1	1	0.875	0.884
UniRef90_A6NXU4	0.949	0.912	0.905	1	0.938	0.947	0.6	0	0.256
UniRef90_D4LFR6	0.63	0.604	0.452	1	0.812	0.421	0	0.062	0
UniRef90_R5Y9A9	0.891	0.901	0.833	1	0.812	0.789	0.4	0.719	0.008
UniRef90_C7HAG3	0.913	0.967	0.929	1	1	0.632	0	0.625	0.116
UniRef90_A5ZNS7	0.906	0.89	0.81	1	0.875	0.895	0	0	0.62
UniRef90_A0A2A6ZE59	0.899	0.923	0.81	1	0.875	1	0	0	0
UniRef90_A0A0M6X0K1	0.754	0.89	0.833	0.969	0.75	0.737	0.267	0.281	0
UniRef90_A0A173XFH4	0.87	0.824	0.833	1	1	0.842	0.333	0	0.124
UniRef90_A7UYU6	0.87	0.868	0.881	0.906	0.812	0.105	0	0.219	0.025
UniRef90_R5Z4U6	0.899	0.923	0.81	1	0.812	0.842	0.8	0.875	0.107
UniRef90_A5ZAM4	0.949	0.967	0.881	1	1	1	1	0.969	0.223
UniRef90_R5W3T1	0.754	0.758	0.905	0.812	0.562	0.158	0	0.812	0.645
UniRef90_A0A396GAB1	0.819	0.813	0.667	0.938	0.875	1	1	0.844	0.554
UniRef90_A0A174K528	0.986	0.956	0.952	1	0.938	0.263	0	0.062	0.008
UniRef90_C4ZED7	0.899	0.824	0.857	1	0.812	0.947	0	0	0
UniRef90_A0A0M6WAJ5	0.775	0.747	0.714	0.984	0.75	0.579	0	0	0
UniRef90_A0A2A7APA7	0.812	0.89	0.786	0.984	0.875	1	0	0	0
UniRef90_A0A0M6WB81	0.862	0.89	0.857	1	0.812	0.842	0.333	0	0
UniRef90_D4C9V5	0.732	0.747	0.81	0.984	1	0.105	0	0.281	0.868
UniRef90_W0ERK2	1	0.989	1	0.984	1	1	0	0.844	0.818
UniRef90_C4ZF71	0.913	0.934	0.857	1	0.938	1	0.933	0.5	0.116
UniRef90_B0NSG7	1	0.989	1	1	1	0.421	0	0.844	0.083
UniRef90_A5KL06	0.601	0.527	0.667	0.953	0.75	0.842	0.4	0.469	0.669
UniRef90_A0A174LZS3	0.746	0.626	0.69	0.984	1	1	0.667	0	0.017
UniRef90_A0A395ZFE0	0.601	0.67	0.619	0.906	0.75	0	0	0	0
UniRef90_D4JXR0	0.949	0.923	0.881	1	0.938	0.947	0.067	0	0.025
UniRef90_A0A0M6WV61	0.841	0.879	0.833	1	0.812	0.526	0	0	0
UniRef90_A0A396ECZ7	0.993	0.934	0.976	0.984	1	0.263	0	0.906	0.678
UniRef90_A0A395ZMG5	0.899	0.923	0.833	1	0.812	0.789	0.733	0.531	0
UniRef90_A0A396FC48	0.717	0.769	0.69	0.984	0.75	0.579	0	0	0
UniRef90_R6C7R8	0.116	0.11	0.167	0.359	0.5	0.526	1	0	0.744
UniRef90_D4KAT6	0.884	0.934	0.762	1	0.875	1	0	0	0
UniRef90_A0A2A7A3Q8	0.877	0.923	0.881	1	0.875	0.947	0.8	0.188	0.099
UniRef90_A0A069S7N8	0.804	0.692	0.81	0.922	0.875	0.684	0.067	0.438	0.43
UniRef90_A0A078R7F2	0.855	0.846	0.905	0.797	0.75	0.053	0	0	0
UniRef90_C4ZD46	0.92	0.945	0.881	1	0.875	0.947	0.867	0.969	0.008
UniRef90_A0A174YT04	0.913	0.967	0.905	1	0.938	0.263	0	0	0.008
UniRef90_A0A139K2S1	1	0.989	1	0.984	1	0.316	0.667	0.781	0.793
UniRef90_A0A139KDX9	0.899	0.879	0.881	0.953	0.875	0.211	0	0.469	0.421
UniRef90_C4Z7L0	0.899	0.912	0.786	1	0.938	1	0.267	0.781	0
UniRef90_A0A3E5EDH7	0.862	0.835	0.905	0.828	0.812	0.053	0	0	0.008
UniRef90_A0A174FJF4	0.928	0.912	0.833	1	0.938	1	0	0.312	0.008
UniRef90_A0A139K951	0.065	0.022	0.119	0.453	1	0	0	0	0.694
UniRef90_D4JXS9	0.92	0.89	0.881	1	0.938	0.684	0.133	0	0
UniRef90_D4L162	0.754	0.791	0.81	0.984	0.875	0.263	0	0	0.099
UniRef90_A0A174NKG3	0.71	0.637	0.81	0.969	1	1	0.8	0.062	0.033
UniRef90_R5UV19	0.797	0.846	0.81	0.984	0.75	0.737	0	0	0
UniRef90_D1PLZ5	0.899	0.879	0.786	1	0.938	0.526	0	0	0.116
UniRef90_D4JA91	0.623	0.659	0.69	0.984	1	0.947	0	0	0.017
UniRef90_A0A0M6WEG7	0.913	0.912	0.857	1	0.812	0.947	0.733	0.781	0
UniRef90_C4ZBU5	0.87	0.901	0.81	1	0.812	0.789	0.4	0	0
UniRef90_C0FUE2	0.652	0.626	0.762	0.859	0.938	0.526	0.4	0.188	0
UniRef90_B0GAE1	0.746	0.78	0.69	1	1	0.789	0	0	0
UniRef90_A0A174E0F2	1	0.989	1	1	1	0.895	0.133	0.844	0.826
UniRef90_A0A0M6WRV9	0.899	0.912	0.786	1	0.875	0.474	0.133	0	0
UniRef90_A0A3E5EDG7	0.928	0.901	0.952	0.922	0.875	0.105	0	0	0.231
UniRef90_C4Z9U8	0.928	0.923	0.857	1	1	0.842	0	0	0
UniRef90_D1PK18	0.877	0.879	0.762	1	0.938	0.842	0	0	0
UniRef90_A0A173RZE7	0.87	0.89	0.833	1	0.812	0.632	0.133	0.312	0
UniRef90_A0A252F3H1	0.899	0.912	0.905	1	1	1	1	0.938	0.736
UniRef90_F3APC4	0.616	0.593	0.667	0.969	1	0.895	0.4	0	0.025
UniRef90_F7JK95	0.971	0.967	0.833	1	1	1	0	0.062	0.413
UniRef90_A5Z2Z6	0.848	0.758	0.786	0.953	0.812	1	0.867	1	0.926
UniRef90_A0A0M6WSR1	0.87	0.934	0.81	1	0.812	0.789	0	0	0
UniRef90_A0A0P0L8X9	0.971	0.945	1	0.953	0.938	0.632	0	0.781	0.579
UniRef90_B7ARS8	0.884	0.868	0.833	1	0.875	0.632	0.667	0.031	0
UniRef90_C7H5A0	0.797	0.846	0.762	1	0.938	1	0	0	0.322
UniRef90_R9NHK6	0.616	0.527	0.476	0.719	0.812	0	0	1	0
UniRef90_A0A396EYX8	0.986	0.956	0.952	1	0.938	0.263	0	0.094	0.017
UniRef90_F4XHW3	0.92	0.879	0.905	1	0.938	0.947	0.067	0	0.017
UniRef90_B7B9R9	0.964	0.978	1	0.625	0.688	0.684	0	0.5	0.612
UniRef90_A0A076YZQ3	0.819	0.747	0.786	1	0.875	0.947	0.2	0.938	0.19
UniRef90_C4ZBS1	0.913	0.934	0.833	1	0.938	0.737	0.6	0.375	0.083
UniRef90_A0A2N5P2T7	0.957	0.945	0.929	1	1	0.158	0	0	0
UniRef90_B8QUH0	0.841	0.846	0.81	1	1	1	0	0.969	0.893
UniRef90_E2ZLZ9	0.841	0.879	0.81	1	0.875	0.947	0	0	0.421
UniRef90_A0A0M6X0G3	0.87	0.901	0.857	1	0.812	0.789	0.533	0.781	0
UniRef90_A0A3E4TMC8	0.891	0.912	0.857	1	1	0.947	0	0.125	0.826
UniRef90_Q8A4A1	1	0.989	1	1	1	0.316	0.4	0.844	0.719
UniRef90_B0NTF1	1	0.989	1	1	1	0.263	0.333	0.844	0.777
UniRef90_UPI000DE4AA75	0.797	0.923	0.833	1	0.875	0.316	0	0.031	0.488
UniRef90_C4Z908	0.848	0.857	0.81	1	0.875	0.789	0.667	0.906	0.165
UniRef90_A0A1T4IYC5	0.993	0.978	1	0.984	0.938	0.211	0	0.844	0.711
UniRef90_A7A6N2	0.565	0.571	0.667	0.844	0.812	0.842	1	0.562	0.579
UniRef90_A8S8V6	0.833	0.813	0.667	0.984	0.875	0.947	0	0	0
UniRef90_R5ZB68	0.848	0.912	0.833	0.984	0.812	0.526	0	0	0
UniRef90_B5D2J7	0.899	0.846	0.952	0.797	0.75	0.053	0	0	0.008
UniRef90_R7KG75	1	0.989	1	1	1	0.263	0.4	0.844	0.711
UniRef90_A0A174E062	0.848	0.736	0.667	0.984	0.812	0.947	0	0	0.008
UniRef90_A0A174QXZ1	0.514	0.56	0.476	0.984	0.75	0.579	0.2	0	0
UniRef90_C4ZG24	0.79	0.868	0.786	0.984	0.75	0.579	0	0.188	0
UniRef90_A0A3E2SXG9	0.775	0.835	0.786	1	0.875	0.579	0	0	0.669
UniRef90_A0A174FZ57	0.812	0.857	0.571	1	0.938	0.789	0	0	0
UniRef90_A0A395ZFN8	0.855	0.923	0.833	1	0.75	0.737	0	0	0
UniRef90_F4XH62	0.935	0.923	0.857	1	0.938	0.947	0.667	0.031	0.107
UniRef90_D4JA70	0.616	0.582	0.595	0.953	0.875	0.842	0	0	0.05
UniRef90_D6DLD6	0.964	0.945	0.929	1	0.938	0.421	0	0	0.041
UniRef90_B3CAS6	0.587	0.67	0.714	0.812	0.938	0.316	0	0.781	0.76
UniRef90_A5ZSX2	0.572	0.516	0.643	0.938	0.938	0.789	0.2	0	0.008
UniRef90_R6JBJ8	1	0.989	1	1	1	0.579	0.733	0.938	0.636
UniRef90_R5YN30	0.855	0.89	0.833	0.984	0.812	0.632	0	0	0.066
UniRef90_G1VSP2	0.891	0.923	0.738	1	1	0.947	0	0.25	0.008
UniRef90_A0A3E4G4R4	1	0.989	1	1	1	0.474	0.533	0.844	0.76
UniRef90_A0A2A7BB99	0.899	0.879	0.81	1	0.875	0.947	0.133	0	0
UniRef90_B0G6W6	0.906	0.989	0.857	0.969	0.938	0.842	0	0.875	0.719
UniRef90_A6KYH6	1	0.989	1	1	1	0.421	0.467	0.844	0.686
UniRef90_C4ZBS8	0.862	0.868	0.81	0.984	0.812	0.789	0.8	0.656	0.025
UniRef90_A0A395ZHP3	0.855	0.901	0.81	1	0.812	0.737	0.067	0	0
UniRef90_C4Z929	0.906	0.912	0.833	0.984	0.875	0.789	0.533	0.906	0.074
UniRef90_C4ZCE7	0.942	0.956	0.881	1	0.875	0.947	1	0.906	0.124
UniRef90_A0A1L5KVV2	0.63	0.44	0.548	0.734	0.812	0.947	0.2	0.094	0.876
UniRef90_B5CWT0	0.406	0.275	0.262	0.641	0.688	0.632	1	0.75	0.752
UniRef90_C4ZEK2	0.884	0.912	0.857	1	0.812	0.737	0.333	0.156	0
UniRef90_D4JSK0	0.957	0.934	0.905	1	1	1	0	0	0
UniRef90_G5SM11	0.942	0.879	0.905	0.891	1	1	0	0.531	0.661
UniRef90_D4JB63	0.913	0.901	0.81	1	0.938	1	0.333	0	0.066
UniRef90_W4PT15	1	0.989	1	1	1	0.632	1	0.844	0.744
UniRef90_C0FSN2	0.848	0.912	0.929	0.891	0.812	0.579	0	0	0.579
UniRef90_Q8A487	0.978	0.967	1	0.984	0.875	0.316	0.4	0.75	0.736
UniRef90_A0A174M0N4	0.906	0.857	0.857	0.969	0.875	0.579	0	0	0
UniRef90_D4KXS3	0.935	0.923	0.881	1	0.938	0.895	0.933	1	0.132
UniRef90_C4ZHH5	0.884	0.923	0.857	1	0.812	0.579	0	0	0
UniRef90_A0A081TW72	1	0.989	1	1	1	0.632	0.133	0.844	0.777
UniRef90_Q8A8R5	1	0.989	1	1	1	0.263	0	0.094	0.256
UniRef90_B7C9A7	0.551	0.615	0.667	0.969	0.938	0.895	0	0	0.033
UniRef90_D4JA79	0.674	0.648	0.738	0.953	0.938	0.947	0	0	0.008
UniRef90_C0FXH0	0.942	0.956	0.881	1	1	1	1	0	0
UniRef90_W6NZ48	1	0.978	1	0.984	0.938	0.947	0	0.844	0.777
UniRef90_A0A0M6WB74	0.877	0.736	0.667	0.984	0.812	0.947	0	0	0
UniRef90_A0A173TYZ3	0.587	0.604	0.69	0.984	0.938	0.895	0.067	0	0.182
UniRef90_A0A395ZFN1	0.87	0.901	0.857	1	0.75	0.737	0	0	0
UniRef90_A0A2N5NS65	0.558	0.56	0.619	0.938	0.938	0.947	0	0	0.025
UniRef90_C4ZDU4	0.826	0.868	0.81	0.984	0.75	0.474	0	0	0
UniRef90_A0A069SH13	0.986	0.934	1	0.984	1	0.474	0	0.812	0.587
UniRef90_D1JU67	1	0.989	1	0.984	1	0.737	0.067	0.469	0.843
UniRef90_F4XHV1	0.862	0.89	0.857	1	0.812	0.895	0.867	0	0
UniRef90_H1B798	0.761	0.736	0.762	0.984	0.875	0.895	0.2	0.938	0.636
UniRef90_A0A396FI06	0.826	0.901	0.833	1	0.812	0.684	0	0	0
UniRef90_C4ZBD5	0.877	0.923	0.81	1	0.75	0.842	0.4	0.406	0
UniRef90_D4JA55	0.674	0.593	0.714	0.969	0.938	0.947	0.067	0	0.107
UniRef90_R5ZAF4	0.899	0.912	0.81	1	0.875	0.895	0.8	0.781	0.091
UniRef90_A0A396AIL1	0.935	0.956	0.881	1	0.875	0.947	0.933	0	0
UniRef90_D4J3R6	0.862	0.857	0.786	0.953	0.75	0.842	0.867	0.375	0.008
UniRef90_A0A380YYV6	0.812	0.835	0.714	0.797	0.688	0.105	1	0.719	0.38
UniRef90_C0ESU0	0.79	0.835	0.595	1	0.875	0.632	0	0	0
UniRef90_A5ZNY3	0.63	0.582	0.405	0.984	0.875	0.579	0	0	0.008
UniRef90_A7AJP7	0.848	0.802	0.905	0.922	0.938	0.263	0	0.531	0.107
UniRef90_R5VX92	1	0.989	1	0.984	1	0.316	0.4	0.844	0.769
UniRef90_A6KXK1	0.971	0.945	1	0.953	0.875	0.211	0.333	0.844	0.711
UniRef90_C4Z988	0.87	0.901	0.833	1	0.812	0.789	0.133	0.094	0
UniRef90_A0A1Y3YEB5	0.717	0.692	0.619	0.922	0.875	0.211	0	0	0.24
UniRef90_A0A374NP07	0.949	0.89	0.905	1	1	0.947	0	0	0.116
UniRef90_E2ZNI5	0.87	0.912	0.81	1	0.875	0.947	0	0	0
UniRef90_E2ZJS2	0.79	0.912	0.833	1	0.875	1	0	0	0
UniRef90_C4ZDC1	0.833	0.868	0.81	1	0.75	0.737	0	0	0
UniRef90_A0A0M6WZG3	0.754	0.835	0.762	0.984	0.812	0.737	0.2	0.25	0
UniRef90_D4JD60	0.551	0.549	0.714	0.938	0.875	0.842	0	0	0.033
UniRef90_D4LFP9	0.674	0.626	0.619	0.969	0.938	0.684	0.4	0.5	0.248
UniRef90_A0A2A6ZLT1	0.899	0.923	0.762	0.984	0.875	0.947	0	0	0
UniRef90_C4ZDY3	0.804	0.879	0.762	0.969	0.812	0.789	0	0	0
UniRef90_A0A174JYK3	0.993	0.978	0.952	1	0.938	0.263	0	0.75	0.017
UniRef90_A5ZWS6	0.601	0.538	0.238	0.969	0.75	0.789	0	0	0.05
UniRef90_A0A174ISA9	0.819	0.868	0.786	0.984	0.938	0.368	0.267	0.094	0.157
UniRef90_D6E2Z4	0.855	0.89	0.81	0.984	0.812	0.632	0	0	0
UniRef90_A0A173UNL4	0.978	0.989	0.976	1	1	0.211	0	0	0
UniRef90_T5S2I8	0.877	0.879	0.881	1	0.875	0.789	0	0	0
UniRef90_A0A0M6WWD2	0.87	0.879	0.833	0.984	0.812	0.737	0.333	0.344	0.008
UniRef90_W6NZG1	1	0.989	1	0.984	1	0.842	0	0.812	0.81
UniRef90_B0MSG9	0.913	0.879	0.881	1	0.938	0.211	0	1	0.669
UniRef90_A0A076Z3Z1	0.667	0.813	0.69	0.922	0.688	0.895	0.2	0.062	0.041
UniRef90_C7H8M9	0.92	0.89	0.833	1	0.938	0.737	0.067	0	0
UniRef90_D4JD40	0.877	0.868	0.881	1	0.938	0.947	0	0	0.041
UniRef90_C0FZS9	0.942	0.967	0.905	1	0.938	1	0	0	0
UniRef90_I9FJM4	1	0.978	1	0.969	0.875	0.842	0	0.75	0.785
UniRef90_A0A285PSV2	0.587	0.615	0.643	0.953	0.938	0.895	0	0	0.025
UniRef90_A0A367FSS7	0.681	0.604	0.452	0.953	0.812	0.737	0	0	0.008
UniRef90_P0A3Y5	0.623	0.462	0.476	0.766	1	0	0	0	0.967
UniRef90_C4Z0Q6	0.935	0.934	0.833	1	0.938	1	1	0.312	0.397
UniRef90_C7H8R6	0.942	0.923	0.881	1	0.938	0.947	0.733	0	0.074
UniRef90_R9HL83	0.928	0.912	0.952	0.906	0.75	0.105	0	0.719	0.231
UniRef90_D4K6T2	0.986	0.989	0.976	1	0.938	0.684	0	0	0.099
UniRef90_A0A3E5A3P9	0.877	0.901	0.857	1	0.938	0.947	0	0	0
UniRef90_A0A2A7BHE3	0.971	1	0.929	1	1	0.684	0	0.094	0.901
UniRef90_C4Z9W5	0.862	0.846	0.786	0.969	0.812	0.579	0.133	0.062	0.008
UniRef90_U2PNB7	0.986	0.978	1	1	1	0.947	0	0	0
UniRef90_A0A116NS82	0.978	0.967	0.929	1	1	0.947	0	1	0.835
UniRef90_A0A3E5EJF8	0.754	0.857	0.738	1	0.875	0.632	0	0	0
UniRef90_A0A0M6WC88	0.942	0.945	0.881	1	0.875	0.947	0.667	0.844	0.033
UniRef90_R5YHR1	0.87	0.912	0.857	0.984	0.75	0.684	0.267	0.375	0.017
UniRef90_A0A395ZI46	0.855	0.912	0.833	1	0.75	0.789	0.533	0.312	0
UniRef90_N2BHU9	0.928	0.923	0.881	1	0.875	0.789	0.867	1	0.041
UniRef90_D1PJ25	0.841	0.934	0.857	1	1	0.316	0	0	0.264
UniRef90_B0NQJ5	1	0.989	1	0.984	0.938	0.211	0.933	0.812	0.694
UniRef90_B0G8T0	0.623	0.659	0.786	0.969	1	0.947	0.067	0	0.157
UniRef90_A0A2A7BD22	0.797	0.769	0.714	1	1	0.895	0.4	0.062	0.413
UniRef90_R5YJL8	0.884	0.912	0.81	1	0.812	0.789	0.8	0.094	0
UniRef90_A0A174SFH7	0.79	0.802	0.667	1	0.875	1	0.867	0	0.554
UniRef90_U2DV50	0.812	0.857	0.786	1	0.875	0.947	0.2	0.094	0.868
UniRef90_A6LEJ2	1	0.978	1	1	1	1	1	1	0.868
UniRef90_R6YCX3	0.145	0.132	0.19	0.422	0.5	0.368	1	0.688	0.818
UniRef90_A0A173VFV9	0.913	0.89	0.833	1	1	1	0	0	0
UniRef90_C0BDI9	0.92	0.934	0.952	1	0.938	0.789	0	0.906	0.719
UniRef90_A0A015VSW2	0.862	0.846	0.905	0.828	0.812	0	0	0	0.008
UniRef90_R5UV14	0.87	0.912	0.81	1	0.812	0.737	0	0	0
UniRef90_D4IZF5	0.877	0.868	0.786	1	0.812	0.737	0.333	0.656	0.041
UniRef90_A0A1Q6IQ53	0.862	0.846	0.905	0.828	0.875	0.053	0	0	0
UniRef90_A0A174D2X7	0.935	0.912	0.833	1	0.938	1	0	0.375	0.008
UniRef90_C7H6U5	0.942	0.978	0.929	1	0.938	0.632	0	0	0.033
UniRef90_A0A2A7ADF2	0.884	0.989	0.881	1	1	0.947	0	0.094	0.719
UniRef90_A0A285PS72	0.804	0.835	0.81	1	0.938	0.684	0	0.031	0
UniRef90_A0A174SJJ8	0.841	0.879	0.786	1	0.875	0.947	0	0	0.281
UniRef90_A0A174CER3	0.877	0.89	0.881	1	0.75	0.842	0.267	0	0
UniRef90_D6DF46	0.841	0.868	0.857	1	0.875	0.421	0	0	0.058
UniRef90_C7H8M7	0.92	0.901	0.857	1	0.938	0.947	0.067	0	0
UniRef90_A0A3E2WMI2	0.87	0.824	0.738	1	0.938	0.947	0.2	0	0.124
UniRef90_A0A2A7A419	0.804	0.769	0.667	0.984	1	0.947	0.333	0.156	0.496
UniRef90_A7V2K8	0.913	0.901	0.857	0.953	0.875	0.316	0	0.656	0.091
UniRef90_D4LD78	0.725	0.747	0.762	0.922	0.625	0.947	0.933	0.438	0.537
UniRef90_A8S8Y2	0.833	0.813	0.667	0.984	0.875	0.947	0	0	0
UniRef90_A0A0M6WW19	0.884	0.901	0.857	1	0.812	0.842	0.267	0.562	0
UniRef90_R6TY06	0.659	0.527	0.643	0.953	0.562	0.842	0	0	0
UniRef90_D4MQP8	0.862	0.802	0.857	1	0.875	0.368	0	0	0.24
UniRef90_I9U4P4	0.913	0.89	0.905	0.812	0.875	0.105	0	0	0.008
UniRef90_A0A3E2XTM8	0.761	0.802	0.69	0.938	0.875	1	0.933	1	0.727
UniRef90_R5YC45	0.87	0.923	0.833	1	0.812	0.737	0.667	0.75	0
UniRef90_R6VGL3	0.928	0.923	0.857	0.938	0.875	0	0	0.844	0
UniRef90_R5Y9P6	0.855	0.923	0.81	1	0.75	0.737	0.133	0.531	0
UniRef90_A0A395ZFM1	0.841	0.89	0.833	1	0.812	0.474	0.133	0	0
UniRef90_R5YL97	0.87	0.912	0.81	1	0.812	0.789	0.333	0.094	0
UniRef90_D4LUC4	0.616	0.473	0.5	0.656	0.812	0.947	0.2	0.094	0.86
UniRef90_A0A1Q2C5Y4	0.935	0.934	0.81	1	0.938	0.421	0	0.781	0
UniRef90_A0A374QB39	0.986	0.978	1	0.984	0.938	0.421	0.4	0.844	0.711
UniRef90_P30899	0.906	0.857	0.881	0.516	1	0.947	0	0	0.653
UniRef90_V8BKQ3	0.703	0.681	0.762	0.953	1	0.684	0.4	0	0
UniRef90_A0A174XWP6	0.92	0.879	0.881	1	0.875	0.895	0.067	0	0
UniRef90_D4KXU1	0.928	0.868	0.881	1	0.938	0.263	0	0	0
UniRef90_R0AZG5	0.978	0.989	0.952	1	1	0.895	0	1	0.843
UniRef90_B5D2H0	0.884	0.846	0.905	0.844	0.875	0.105	0	0	0.008
UniRef90_B7ANN7	0.884	0.89	0.833	1	1	0.895	0.133	0.25	0.388
UniRef90_A0A174Y457	0.935	0.923	0.881	1	0.938	0.947	0.533	0	0.017
UniRef90_D4KT60	0.826	0.813	0.714	0.969	0.75	1	0.6	0	0
UniRef90_C7GB68	0.732	0.725	0.69	0.938	0.812	0.737	0.133	0.875	0.281
UniRef90_J9H3P5	0.87	0.835	0.905	0.766	0.75	0.737	0.067	0.594	0.785
UniRef90_A0A0P0GDE8	1	0.989	1	0.984	1	0.474	0	0.75	0.14
UniRef90_A0A174GBZ5	0.978	1	1	1	1	0.947	0	0.969	0.099
UniRef90_R5UKG9	0.884	0.901	0.81	1	0.812	0.895	0.6	0.906	0.041
UniRef90_A0A174FN26	0.942	0.89	0.833	1	0.875	0.947	0	0.625	0.017
UniRef90_W0U6Q9	0.804	0.769	0.786	1	0.875	0.895	0.4	0	0
UniRef90_A0A174LPJ5	0.978	0.978	0.952	1	1	0.947	0	0.188	0.636
UniRef90_A0A285PRQ4	0.623	0.615	0.738	0.953	1	0.947	0.133	0	0.017
UniRef90_C6JA65	0.725	0.736	0.69	0.922	0.75	0.737	0.067	0	0.033
UniRef90_B0NNU5	0.891	0.934	0.786	0.531	0.438	0.737	0	0.406	0.719
UniRef90_A0A3E5E465	0.884	0.879	0.929	0.75	0.75	0.684	0	0	0.686
UniRef90_A0A173U4I8	0.957	1	1	1	1	0.947	0	0.406	0.273
UniRef90_Q8A9S7	1	0.989	1	1	1	0.474	0.533	0.844	0.81
UniRef90_C4ZAV7	0.935	0.945	0.881	1	0.875	0.842	0.733	0.812	0.157
UniRef90_A0A396E1H8	0.993	0.978	1	1	1	1	0	0.281	0.76
UniRef90_A8SCH0	0.877	0.912	0.905	1	1	1	0	0.375	0.397
UniRef90_C4ZBH1	0.841	0.879	0.857	1	0.812	0.632	0.067	0.281	0
UniRef90_A0A395ZJ44	0.841	0.879	0.833	0.984	0.75	0.632	0.2	0.094	0
UniRef90_U2CK93	0.957	0.901	0.929	1	0.938	0.842	0	0	0.322
UniRef90_A0A173VHW5	0.928	0.857	0.786	1	0.938	0.053	0	1	0.248
UniRef90_A0A2N5NS79	0.601	0.648	0.667	0.953	0.938	0.947	0	0	0.008
UniRef90_C7H7M1	0.891	0.934	0.81	1	0.938	0.737	0	0.938	0
UniRef90_D4KV19	0.928	0.956	0.857	1	0.812	0.895	0	0.469	0.05
UniRef90_C7H9E0	0.877	0.846	0.762	1	0.875	0.947	0	0	0
UniRef90_A0A174Z6W2	0.906	0.923	0.762	1	0.938	0.632	0	0	0.314
UniRef90_C3R961	0.862	0.78	0.81	0.906	1	0.947	0	0.594	0.917
UniRef90_D4KAL1	0.891	0.912	0.762	1	0.875	1	0.067	0	0.008
UniRef90_A6P028	1	1	0.976	1	1	1	1	1	0.975
UniRef90_A0A174Z629	0.899	0.901	0.833	1	0.938	0.474	0.533	0	0.008
UniRef90_A0A0J9I2L5	1	1	1	0.984	1	0.526	0	0.625	0.19
UniRef90_C4Z9Q2	0.819	0.846	0.714	0.984	0.812	0.579	0.067	0	0
UniRef90_R6JF12	1	0.989	1	1	1	0.316	0.067	0.844	0.653
UniRef90_R6NWV1	0.725	0.67	0.714	0.969	0.688	0.895	0	0	0
UniRef90_A0A078R8J5	1	0.978	1	0.953	0.875	0.211	0.067	0.844	0.545
UniRef90_C4Z9C9	0.87	0.923	0.833	1	0.812	0.737	0.8	0.406	0.355
UniRef90_D4L153	0.63	0.593	0.619	0.984	0.938	0.895	0	0	0.008
UniRef90_A5ZSY5	0.609	0.637	0.667	0.984	1	0.895	0.067	0	0.231
UniRef90_E5XHF2	0.964	0.956	0.905	1	1	0.579	0	0	0.017
UniRef90_A0A174TTJ1	0.848	0.835	0.929	0.828	0.688	0.158	0.333	0.781	0.645
UniRef90_C4ZAW6	0.949	0.945	0.881	1	0.875	0.895	0.933	1	0.041
UniRef90_G9YL23	0.935	0.923	0.905	1	1	0.947	0	0.344	0.413
UniRef90_D1PGV2	0.442	0.396	0.476	0.531	0.562	0.947	0.733	0.531	0.702
UniRef90_A5ZYU6	0.703	0.692	0.619	0.984	1	0.895	1	1	0.752
UniRef90_R5YUH1	0.833	0.901	0.81	1	0.875	0.421	0	0	0
UniRef90_H1B4Y0	0.957	0.978	0.929	1	1	0.421	0	0.125	0.843
UniRef90_A0A285PPQ3	0.964	0.956	0.905	1	1	0.947	0.067	0.312	0.504
UniRef90_A0A078SW85	0.978	0.978	1	0.984	1	0.263	0	0.656	0.339
UniRef90_D4JD93	0.971	0.945	1	1	1	0.158	0	0	0
UniRef90_A0A285PRR7	0.652	0.615	0.571	0.953	0.938	0.895	0	0	0.025
UniRef90_U5F4R0	0.862	0.934	0.786	0.969	0.938	0.316	0	0.094	0.826
UniRef90_B0P5G9	0.986	0.989	0.929	1	1	0.211	0	0	0
UniRef90_C7H8R2	0.906	0.89	0.881	1	0.875	0.789	0	0	0.008
UniRef90_A0A174GXS8	0.906	0.901	0.881	1	0.938	1	1	0.625	0.008
UniRef90_A0A3E5E3S0	0.833	0.846	0.714	1	0.938	0.895	0.467	0	0.05
UniRef90_A0A396FTF8	0.623	0.626	0.69	0.969	0.938	0.947	0	0	0.017
UniRef90_Q8A476	1	0.989	1	1	1	0.474	0.467	0.844	0.736
UniRef90_F4XGS3	0.884	0.879	0.881	1	1	0.947	0.733	0.125	0.579
UniRef90_E4MAW9	1	0.989	1	0.984	1	0.842	0	0.906	0.802
UniRef90_Q89Z22	1	0.989	1	1	1	0.316	0.333	0.844	0.645
UniRef90_I8ZLP8	0.862	0.857	0.905	0.828	0.812	0.053	0	0	0
UniRef90_C4ZI85	0.884	0.901	0.905	1	0.812	0.947	0.733	0.656	0.033
UniRef90_A6L5A6	0.993	0.978	1	1	1	0.158	0.667	0.844	0.512
UniRef90_Q8A525	1	0.989	1	1	1	0.368	0	0.844	0.545
UniRef90_C4ZGF4	0.928	0.901	0.881	1	0.938	0.895	0.533	0.719	0
UniRef90_B0P0P6	0.681	0.67	0.69	0.969	0.75	0.842	0.067	1	0.132
UniRef90_A0A0P0M0G9	0.993	0.978	1	0.969	0.938	0.211	0.867	0.844	0.727
UniRef90_A0A3E4X9I7	0.79	0.835	0.667	0.969	0.938	0.421	0	0.531	0.273
UniRef90_A7B5H0	0.594	0.462	0.571	0.938	1	0.947	0	0	0.008
UniRef90_C4ZDB0	0.819	0.912	0.81	1	0.75	0.737	0	0	0
UniRef90_U2DW97	0.71	0.791	0.69	0.953	0.875	1	0.133	0.094	0.818
UniRef90_C0FUH6	0.775	0.758	0.714	0.922	0.625	0.947	0	0	0
UniRef90_A0A1Q6HIL9	1	0.989	1	1	1	0.316	0.133	0.844	0.686
UniRef90_D3AUQ8	0.841	0.813	0.738	0.969	0.875	0.316	0	0	0.19
UniRef90_C0FVR2	0.935	0.967	0.857	1	0.938	1	0.933	0.594	0.058
UniRef90_A0A136Q7W4	0.942	0.945	0.976	1	1	0.947	0	0.062	0.942
UniRef90_A0A329TLD1	0.928	0.912	0.833	1	0.938	1	0	0.5	0
UniRef90_Q650G6	1	0.989	1	0.969	0.938	0.789	0	0.75	0.802
UniRef90_C7H8U0	0.906	0.89	0.833	1	0.938	0.842	0.133	0	0.025
UniRef90_A0A395X5I7	0.899	0.934	0.857	1	0.938	0.947	0	0.531	0
UniRef90_A0A2A6ZB54	0.87	0.868	0.786	0.984	1	0.895	0.533	0.031	0.595
UniRef90_E5VKQ7	0.949	0.879	0.905	1	1	1	0	1	0.76
UniRef90_E2ZFR1	0.478	0.473	0.286	0.938	0.688	0.105	0	0	0.653
UniRef90_R5YCB1	0.841	0.879	0.857	1	0.812	0.842	0.067	0.562	0.008
UniRef90_A0A174EJL6	1	0.989	1	0.984	0.938	0.211	0.067	0.812	0.645
UniRef90_A0A395ZMB4	0.877	0.89	0.81	1	0.812	0.842	1	0	0
UniRef90_D4JXT2	0.913	0.89	0.881	1	0.875	0.684	0	0	0
UniRef90_A0A096B5B1	0.957	0.989	0.952	0.984	1	0.947	0	0.125	0.843
UniRef90_B3CCL6	0.935	0.945	0.857	0.953	0.812	0	0	0	0.008
UniRef90_A7ALV6	0.964	0.945	0.929	0.984	0.938	0.158	0	0.031	0.017
UniRef90_D1PK04	0.928	0.923	0.881	1	0.938	0.947	0.933	0	0
UniRef90_A0A3E2UB56	0.913	0.89	0.738	1	0.875	1	0	0	0
UniRef90_R5YVH5	0.848	0.912	0.833	1	0.812	0.737	0.667	0.781	0.008
UniRef90_R5JUT8	1	0.989	1	1	1	0.263	0.2	0.844	0.661
UniRef90_H1B773	0.457	0.495	0.19	0.922	0.75	0.105	0	0	0.636
UniRef90_A0A396E717	1	1	1	0.984	1	0.789	0	0.781	0.826
UniRef90_C0FT93	0.913	0.912	0.857	1	0.812	0.895	0.467	0.062	0.008
UniRef90_E2ZJE0	0.891	0.879	0.81	0.984	0.938	0.895	0	0	0.017
UniRef90_C0B5M8	0.935	0.912	0.881	0.984	1	0.947	0.6	0	0.083
UniRef90_A0A174BLV1	0.493	0.33	0.214	0.953	0.688	0.421	0	0	0.05
UniRef90_A0A0D8IW01	0.92	0.923	0.881	1	0.938	0.947	0.133	0.469	0.736
UniRef90_R5YDJ2	0.862	0.879	0.81	0.984	0.812	0.737	0.333	0.625	0
UniRef90_A0A0M6W977	0.826	0.879	0.81	0.984	0.812	0.684	0.267	0.188	0.207
UniRef90_A0A174RDT7	0.899	0.901	0.857	1	0.875	0.737	0	0	0
UniRef90_A0A174TV76	0.609	0.516	0.643	0.938	1	0.947	0	0	0.008
UniRef90_C4ZE35	0.645	0.604	0.405	0.953	0.75	0.684	0.133	0	0
UniRef90_D4KAK2	0.928	0.901	0.81	1	0.875	1	0	0	0
UniRef90_A5Z319	1	1	1	1	1	1	1	1	0.959
UniRef90_A0A076IXB1	0.971	0.945	1	0.953	0.875	0.158	0.467	0.844	0.736
UniRef90_A0A174DPY8	0.935	0.934	0.857	1	1	0.421	0	0	0
UniRef90_C4Z9Z6	0.877	0.89	0.81	0.969	0.812	0.789	0.2	0.625	0.008
UniRef90_A0A174QUE0	0.739	0.769	0.714	0.938	1	0.789	0.4	0	0
UniRef90_R8W196	0.674	0.725	0.548	0.969	1	0.316	0	0	0.653
UniRef90_A5ZTV6	0.833	0.89	0.81	1	1	0.947	0.933	1	0.744
UniRef90_C3RAI8	0.993	0.978	1	0.984	1	0.579	0.067	0.844	0.793
UniRef90_E6SW15	1	0.989	1	1	1	0.316	0.4	0.844	0.793
UniRef90_A0A396AKP8	0.913	0.879	0.905	0.922	0.938	0.158	0	0.031	0.017
UniRef90_A0A174YAF1	0.928	0.967	0.905	1	0.938	0.947	0	0.531	0.008
UniRef90_D4IJC6	0.928	0.89	0.905	0.938	0.938	0.211	0	0.031	0.017
UniRef90_C4ZBU3	0.949	0.989	0.905	1	1	1	1	1	0.347
UniRef90_R0BXG6	0.891	0.923	0.929	1	1	1	0	1	0.818
UniRef90_C4ZED9	0.862	0.824	0.762	0.984	0.75	0.737	0.6	0.156	0
UniRef90_C4Z9E3	0.928	0.945	0.881	1	0.875	0.895	0.933	0.719	0
UniRef90_Q8A129	1	0.989	1	1	1	0.789	1	0.844	0.835
UniRef90_A0A3E4SW77	0.862	0.857	0.929	0.875	0.688	0.158	0	0.719	0.744
UniRef90_A0A174CBR2	0.891	0.89	0.81	1	0.875	0.947	0.133	0	0
UniRef90_D4IMJ0	0.913	0.89	0.857	1	0.938	0.105	0	1	0.678
UniRef90_F3PL25	1	0.989	1	1	1	0.211	0	0.844	0.777
UniRef90_A0A0M6WSM2	0.862	0.901	0.833	1	0.812	0.737	0	0	0
UniRef90_C7H8N4	0.928	0.912	0.857	1	0.938	0.947	0	0	0.008
UniRef90_U5F4E0	0.935	0.967	0.952	1	1	0.526	0	0.375	0.785
UniRef90_A0A2A6ZB25	0.783	0.835	0.69	1	0.875	0.842	0	0	0
UniRef90_K0XI40	0.92	0.923	0.881	1	0.938	0.895	0.133	0	0.025
UniRef90_A0A173VWI6	0.92	0.923	0.81	1	0.875	0.526	0.267	0	0
UniRef90_Q8A2E6	1	0.989	1	1	1	0.368	0.733	0.812	0.744
UniRef90_B0MSI8	0.913	0.879	0.833	0.969	0.875	0.474	0.467	1	0.686
UniRef90_E4M058	0.978	0.989	0.976	1	0.938	0.526	0	0	0.008
UniRef90_D5Q544	0.833	0.901	0.905	0.984	1	0.842	0	1	0.95
UniRef90_A8SEK6	0.855	0.857	0.738	1	0.875	0.842	0	0	0
UniRef90_A0A173UWX3	0.949	0.945	0.786	0.984	0.938	0.263	0	0.594	0
UniRef90_A0A173X477	0.92	0.901	0.833	1	1	0.947	0.067	0	0.322
UniRef90_A5ZNW4	0.877	0.824	0.81	1	0.938	1	0.267	0.562	0.512
UniRef90_A5ZYK8	0.558	0.44	0.5	0.953	0.875	0.842	0.667	0.656	0.273
UniRef90_C4ZE32	0.754	0.681	0.595	1	0.812	0.579	0	0	0
UniRef90_A0A174E206	0.587	0.615	0.595	0.938	0.875	0.789	0.467	0.25	0.603
UniRef90_A0A357TQ74	0.725	0.78	0.786	0.891	0.75	1	0	0	0
UniRef90_A5KRH1	0.906	0.934	0.952	1	1	1	1	1	0.86
UniRef90_C4ZBF9	0.899	0.901	0.857	1	0.812	0.947	0.8	0.969	0
UniRef90_A0A174NS35	0.696	0.78	0.524	0.984	0.875	0.895	0	0	0
UniRef90_A0A1Y4VMG2	0.884	0.879	0.833	0.562	0.938	0.632	0	0.125	0.554
UniRef90_C0CKE3	0.913	0.912	0.881	1	1	0.105	0	1	0.132
UniRef90_B0GA48	0.783	0.89	0.714	1	0.938	0.737	0	0.031	0
UniRef90_A7ALY3	0.928	0.901	0.905	0.938	0.938	0.211	0	0.094	0.008
UniRef90_D4M3M3	0.891	0.89	0.786	1	1	0.947	0.067	0	0
UniRef90_A0A3E2YA41	0.899	0.967	0.905	1	0.938	0.895	0	0	0.14
UniRef90_Q8A5S7	1	0.989	1	1	1	0.368	0.067	0.781	0.727
UniRef90_U2QZ81	0.928	0.912	0.881	1	0.875	0.842	0.067	0.938	0.017
UniRef90_A0A2A7AP59	0.913	0.901	0.81	1	0.875	1	0	0	0
UniRef90_A8SC52	0.761	0.747	0.69	0.969	0.875	0.579	0	0	0.041
UniRef90_C7GB84	0.558	0.495	0.571	0.906	0.625	0.579	0.067	0.062	0.033
UniRef90_A0A174E3N9	0.862	0.769	0.738	1	0.938	0.632	0	0	0.033
UniRef90_C7H8N0	0.855	0.846	0.833	1	0.938	0.684	0.067	0	0
UniRef90_C6IJR4	0.87	0.846	0.905	0.844	0.75	0.053	0	0	0.066
UniRef90_D4JXU5	0.928	0.901	0.857	1	0.938	0.789	0	0	0.314
UniRef90_W1V9N6	0.391	0.275	0.333	0.859	0.938	0.947	0.667	0.406	0.686
UniRef90_H1B795	0.804	0.813	0.762	0.984	0.875	0.789	0.467	1	0.669
UniRef90_R6Q8L0	0.884	0.956	0.833	1	0.875	1	0.067	0.062	0.727
UniRef90_D4LZV1	0.841	0.802	0.667	1	1	0.895	0.4	0	0.041
UniRef90_C4Z9Z8	0.957	0.912	0.881	1	1	1	0.933	1	0.421
UniRef90_R5Z7X3	0.775	0.791	0.762	0.938	0.812	0.737	0.133	0.062	0
UniRef90_A0A396AFP6	0.964	0.923	0.905	1	0.938	1	1	0	0.033
UniRef90_A6BKY9	0.739	0.769	0.69	0.969	0.938	1	0.933	1	0.843
UniRef90_N9XGD7	0.949	0.978	0.905	1	1	1	0.067	1	0.661
UniRef90_A0A174Y621	0.739	0.758	0.548	0.984	0.812	0.579	0	0	0
UniRef90_G9YLS6	0.942	0.956	0.905	1	1	0.947	0.133	0.094	0.802
UniRef90_R5VA53	0.913	0.868	0.881	0.969	0.875	0.105	0	1	0.62
UniRef90_R5YLP9	0.804	0.846	0.762	0.984	0.75	0.474	0.267	0	0
UniRef90_C4ZFJ3	0.775	0.791	0.571	1	0.938	0.579	0	0.031	0
UniRef90_U2CWG0	1	0.989	1	0.984	1	0.263	0	0.781	0.645
UniRef90_R9J210	0.957	0.989	1	0.969	1	1	1	1	0.851
UniRef90_R5UWU7	0.913	0.868	0.881	1	0.938	0.158	0.333	1	0.653
UniRef90_C7H6T9	1	1	1	1	1	1	0	1	0.364
UniRef90_A0A3E2T0E0	0.725	0.703	0.571	0.953	0.875	0.158	0	0.125	0.843
UniRef90_E5VG33	0.855	0.824	0.857	0.922	0.625	0.158	0	0.5	0.05
UniRef90_A5ZSY0	0.565	0.648	0.619	0.922	0.938	0.842	0	0	0.008
UniRef90_A0A2A7AMB7	0.877	0.857	0.69	1	1	0.947	0.867	0.156	0.496
UniRef90_A0A068NYL3	0.957	0.956	0.976	1	1	1	0	1	0.975
UniRef90_C0FSG5	0.928	0.934	0.833	1	0.938	0.947	0	0	0
UniRef90_F4XGR4	0.819	0.769	0.738	0.953	1	0.895	0.267	0.031	0.488
UniRef90_B0N9Q2	0.964	0.956	0.952	1	1	1	0.933	0.938	0.661
UniRef90_D4JXQ6	0.884	0.89	0.81	1	0.938	0.947	0	0	0.025
UniRef90_G5GJD3	0.717	0.703	0.643	0.984	0.75	1	0.667	0.875	0.025
UniRef90_A0A174MWG0	0.848	0.824	0.81	1	1	0.947	0.8	0.031	0.612
UniRef90_A0A252F0G2	0.667	0.714	0.619	0.859	0.938	1	0.067	0.094	0.851
UniRef90_A0A173RSC1	0.942	0.857	0.81	1	0.875	0.842	0	0	0
UniRef90_D1PK65	0.449	0.505	0.19	0.922	0.75	0.105	0	0	0.653
UniRef90_F4XGS0	0.826	0.802	0.762	0.984	1	0.895	0.6	0	0.545
UniRef90_D4MYD8	0.855	0.769	0.81	1	0.875	0.895	0	0.938	0.223
UniRef90_I9KG80	0.913	0.956	0.881	0.984	1	0.368	0	0.094	0.744
UniRef90_A0A3E4JIY8	1	0.989	1	0.984	0.938	0.263	0	0.062	0.008
UniRef90_R5YJW1	0.862	0.846	0.786	0.984	0.75	0.684	0.133	0	0
UniRef90_C0EVZ0	0.971	0.978	0.929	1	0.938	0.947	0	0.625	0
UniRef90_D4LVI9	0.848	0.901	0.905	1	0.938	1	0	0.031	0.364
UniRef90_C9YMF2	0.964	0.978	0.857	1	1	0.368	0	0	0
UniRef90_A0A1E3A9M3	0.957	0.934	0.976	1	1	0.053	0	0.031	0.397
UniRef90_A0A174MDE8	0.964	0.956	0.952	1	1	0	0.133	0	0.132
UniRef90_C4Z926	0.913	0.901	0.881	1	0.875	0.947	0.933	0.906	0.008
UniRef90_I8V4S7	0.913	0.945	0.952	0.875	0.812	0.263	0	0.344	0.008
UniRef90_A0A1Y3V2S0	0.935	0.967	1	0.984	1	0.737	0	0.625	0.62
UniRef90_A0A016BWL8	1	0.989	1	0.984	0.875	0.947	0	0.906	0.81
UniRef90_G2T3B2	0.964	0.978	0.952	1	0.938	0.316	0	0	0.008
UniRef90_A0A0S2W8P0	0.957	0.945	0.929	1	1	0.263	0	0.406	0.86
UniRef90_B7ANM9	0.949	0.967	0.952	1	1	0.947	0	0.375	0.355
UniRef90_A0A174DZC8	0.891	0.945	0.786	1	0.938	0.684	0	0	0
UniRef90_R5Z5U6	0.841	0.879	0.81	0.984	0.75	0.684	0.2	0.344	0
UniRef90_R5VAS3	0.855	0.868	0.786	1	0.812	0.684	1	0.531	0
UniRef90_A5ZWV4	0.978	0.967	0.905	1	1	0.947	0	0.156	0.041
UniRef90_A0A397T591	0.08	0.055	0.024	0.344	0.188	0.579	1	0	0.463
UniRef90_A0A395ZG65	0.899	0.868	0.762	0.969	0.875	1	0.533	0	0.091
UniRef90_A0A175A4P5	0.928	0.956	0.881	1	1	0.316	0	0.281	0.76
UniRef90_A0A174S6X8	0.725	0.725	0.548	1	0.812	0.526	0	0	0
UniRef90_G9RNY1	0.899	0.912	0.786	1	0.938	0.947	0.133	0	0
UniRef90_A6NXQ9	0.884	0.857	0.857	1	0.812	0.737	0	0	0
UniRef90_F4XH96	0.87	0.901	0.762	0.984	0.812	1	0	0	0.017
UniRef90_C7H8P7	0.855	0.857	0.881	1	0.938	0.947	0.933	0	0.074
UniRef90_E2ZMD9	0.906	0.901	0.81	0.984	0.875	1	0	0	0
UniRef90_A6NXR1	0.812	0.879	0.905	1	0.938	0.947	0	0	0.066
UniRef90_A0A396AFL8	0.819	0.802	0.667	0.938	0.812	0.158	0	0	0
UniRef90_A0A3A9L3C1	0.696	0.747	0.69	0.984	0.938	0.211	0	0.062	0.231
UniRef90_A0A3E5ED82	0.913	0.901	0.952	0.891	0.812	0.105	0	0	0
UniRef90_A0A139K413	1	0.989	1	0.984	0.938	0.737	0	0.75	0.818
UniRef90_E1KPU4	0.986	0.989	1	0.844	1	0.632	0	0.688	0.727
UniRef90_A0A174MWS7	0.848	0.879	0.69	0.969	1	0.947	0.6	0.062	0.529
UniRef90_D4KNZ7	0.841	0.813	0.929	1	0.875	0.947	0.267	0.062	0.215
UniRef90_A0A2A6ZB02	0.732	0.758	0.667	0.984	1	0.842	0.333	0.062	0.504
UniRef90_C4ZD63	0.855	0.879	0.81	0.984	0.812	0.579	0.133	0.219	0
UniRef90_A0A127SM24	0.812	0.714	0.738	1	1	0.947	0	0	0
UniRef90_Q8A2S5	1	0.989	1	1	1	0.316	0.267	0.781	0.612
UniRef90_A0A2A7B1T6	0.696	0.692	0.5	0.969	0.875	0.947	0	0	0.025
UniRef90_A0A174HSR4	0.906	0.923	0.905	1	1	0.947	0.467	0.406	0.835
UniRef90_E2ZFR4	0.514	0.473	0.262	0.938	0.688	0.105	0	0.781	0.62
UniRef90_A0A3E2XAG7	0.899	0.923	0.762	0.984	0.875	0.947	0	0	0
UniRef90_C9L7F6	0.826	0.835	0.786	1	1	0.421	0	0.469	0.099
UniRef90_A0A133PRE9	0.949	0.923	0.929	0.859	0.812	0.316	0	0.062	0.504
UniRef90_D4ML23	0.906	0.879	0.833	0.938	0.938	0.316	0	0.156	0.76
UniRef90_A0A329TMV9	0.891	0.813	0.738	1	0.938	0.684	0	0.125	0.207
UniRef90_A0A3E4W6B3	0.993	0.978	1	1	1	0.263	0.333	0.812	0.686
UniRef90_R5YTG8	0.804	0.857	0.786	0.984	0.812	0.632	0.2	0	0.025
UniRef90_A0A3E4VCI8	0.768	0.835	0.786	0.938	1	0.579	0.4	0	0
UniRef90_A0A2I7ZEY3	0.971	0.956	0.976	1	1	1	0	1	0.835
UniRef90_F4XGQ2	0.688	0.659	0.571	0.906	1	0.737	0.533	0	0.455
UniRef90_D4JXR3	0.92	0.923	0.857	1	0.938	0.947	0.267	0	0.05
UniRef90_C6LDD1	0.935	0.901	0.857	1	1	0	0	0.875	0.198
UniRef90_A6BEX3	0.935	0.956	0.881	1	1	1	0.667	0.219	0.587
UniRef90_A0A174FKR7	0.993	0.978	1	0.984	0.938	0.263	0.133	0.812	0.612
UniRef90_D4L0W7	0.964	0.967	0.976	1	1	0.947	0	1	0.975
UniRef90_D4J611	0.739	0.703	0.738	0.844	0.938	0.684	0.133	0	0.008
UniRef90_A7V0W4	0.826	0.813	0.857	0.906	0.812	0.158	0	0.406	0.025
UniRef90_R5YN06	0.848	0.923	0.81	0.984	0.812	0.632	0.067	0.156	0
UniRef90_A0A174KI80	0.551	0.527	0.381	0.953	0.875	0.526	0	0	0
UniRef90_B0MSH2	0.913	0.868	0.881	1	0.875	0.105	0	1	0.678
UniRef90_K9EIT5	1	0.989	1	1	1	0.263	0	0.812	0.702
UniRef90_A0A127SQ11	0.572	0.538	0.476	0.922	0.688	0.421	0	0	0
UniRef90_A0A076J2L2	0.862	0.813	0.786	0.938	0.875	0.105	0	0.75	0.752
UniRef90_A0A396G9A0	0.884	0.835	0.881	0.984	0.938	0.737	0	1	0.19
UniRef90_A0A076YZR3	0.754	0.67	0.738	0.953	0.812	0.895	0.067	0	0.008
UniRef90_A0A174CE89	0.92	0.923	0.881	1	0.938	0.947	0.4	0	0.025
UniRef90_A0A174I2N9	0.949	0.956	0.929	1	1	0.947	0	0.125	0.463
UniRef90_A0A174IKQ7	0.928	0.89	0.929	1	0.938	0.789	0	0	0.083
UniRef90_A0A078S457	0.826	0.835	0.81	0.906	0.625	0.053	0	0.375	0.033
UniRef90_C9YMF1	0.971	0.978	0.952	1	1	0.526	0	0	0.636
UniRef90_A0A174JLB0	0.783	0.769	0.571	1	0.875	0.526	0	0	0.008
UniRef90_U5F4Y0	0.957	0.978	0.952	0.969	1	0.474	0	0.094	0.835
UniRef90_A7UZL1	0.862	0.824	0.857	0.922	0.812	0.105	0	0.5	0.041
UniRef90_A7AJP9	0.884	0.857	0.952	0.922	1	0.789	0.867	1	0.744
UniRef90_R5YLH6	0.949	0.967	0.881	1	0.875	1	1	1	0.38
UniRef90_A0A3E5AS22	0.812	0.879	0.81	1	1	0.842	0.333	0	0
UniRef90_A0A174ZXJ1	0.848	0.824	0.833	1	0.875	0.947	0.2	0	0.05
UniRef90_D4LFQ2	0.442	0.495	0.619	0.953	0.75	0.632	0.133	0	0.033
UniRef90_B0G3E5	0.688	0.747	0.595	1	0.938	0.947	0	0	0.264
UniRef90_A0A3E5ECV5	0.906	0.868	0.833	0.875	0.875	0.263	0	0	0.62
UniRef90_A0A3E5GQQ9	0.529	0.56	0.643	0.953	1	0.842	0.067	0	0.008
UniRef90_D4L1Y8	0.964	1	0.952	1	1	0.421	0	0	0.653
UniRef90_C6JCC1	0.906	0.912	0.786	1	1	0.947	0.067	0.625	0.678
UniRef90_A0A174Y9Z1	0.949	0.956	0.881	1	1	0.947	0	0.125	0
UniRef90_A0A139K0U9	0.855	0.846	0.786	0.906	0.75	0.158	0	0.375	0.041
UniRef90_A0A0M6WZH9	0.884	0.89	0.833	1	0.875	0.526	0.533	0.344	0
UniRef90_C7H292	0.899	0.912	0.81	1	0.875	1	0.2	0	0.182
UniRef90_A0A3E4VCL6	0.696	0.802	0.714	0.969	1	0.632	0.4	0	0
UniRef90_A0A174R0P2	0.754	0.813	0.81	0.922	1	0.579	0.4	0	0
UniRef90_A0A3E2X5R4	0.978	0.956	0.929	1	0.938	0.947	0	0.5	0.587
UniRef90_C7GB52	0.703	0.725	0.643	0.953	0.812	0.684	0.133	0	0.008
UniRef90_E8LH06	0.862	0.813	0.714	0.969	1	0.895	0.4	0.062	0.504
UniRef90_A0A0M6X160	0.877	0.923	0.81	1	0.875	0.947	0	0	0
UniRef90_A0A173YRZ1	0.986	0.978	1	0.984	0.938	0.211	0.6	0.844	0.628
UniRef90_A6BGC3	0.768	0.813	0.762	0.953	0.938	0.632	0.4	0	0
UniRef90_A0A140JXE2	0.906	0.868	0.881	0.984	0.938	0.263	0	0.031	0.868
UniRef90_F4XER6	0.906	0.923	0.881	1	0.938	0.895	0.4	0	0.083
UniRef90_A0A174QBF2	0.971	0.989	0.976	0.938	0.875	0.158	0.067	0	0.008
UniRef90_A0A078RZP9	0.804	0.857	0.857	0.906	0.75	0.105	0	0.438	0.058
UniRef90_U2KQU1	0.935	0.956	0.857	1	1	0.947	0	0.688	0.008
UniRef90_R9KSB2	0.652	0.659	0.643	0.984	0.75	1	0.533	0.781	0.033
UniRef90_A0A0P0L0E5	0.978	0.978	1	0.969	0.938	0.211	0.067	0.844	0.207
UniRef90_A0A176U5Z8	0.957	0.978	1	1	1	0.947	0	1	0.843
UniRef90_D4RZQ9	0.826	0.879	0.786	0.938	0.812	0.263	0	0	0
UniRef90_R6J5Q7	0.993	0.978	1	0.969	0.938	0.316	0.533	0.781	0.727
UniRef90_A0A0M6WCD6	0.804	0.89	0.857	1	0.812	0.737	0	0	0
UniRef90_D4L188	0.964	0.978	0.929	1	0.875	0.789	0	0.406	0.455
UniRef90_B0NSE8	0.754	0.736	0.571	0.906	0.812	0.053	0	0.25	0.091
UniRef90_G2T0E6	0.891	0.934	0.857	1	1	0.895	0.267	0	0
UniRef90_D4KP02	0.717	0.725	0.714	0.938	0.688	0.684	0.133	0.031	0.017
UniRef90_A7AE91	0.92	0.912	0.905	0.938	0.875	0.211	0	0	0.008
UniRef90_F4XHW6	0.913	0.901	0.881	1	0.938	0.789	0	0	0
UniRef90_A0A0P0M3Z0	0.855	0.901	0.976	0.875	0.75	0.263	0	0.812	0.025
UniRef90_A7UXW6	0.92	0.868	0.881	0.938	0.875	0.158	0	0.438	0.223
UniRef90_D4J5Y3	0.717	0.725	0.69	0.906	0.938	0.474	0.267	0	0
UniRef90_A8SC38	0.826	0.769	0.762	0.953	0.812	0.316	0	0	0
UniRef90_B5D0K9	0.978	0.967	0.929	1	1	0.842	1	0.844	0.711
UniRef90_A0A069S1E1	0.986	0.978	1	0.984	0.938	0.158	0	0.281	0.05
UniRef90_A0A3E4IG89	1	0.978	1	0.984	0.938	0.211	0	0	0.083
UniRef90_A0A2D1TZK6	0.957	0.923	0.881	1	1	1	0	0.312	0.934
UniRef90_A0A0M6WMK2	0.942	0.956	0.857	1	0.875	0.895	0	0.469	0.124
UniRef90_A7B5X1	1	1	1	1	1	1	1	1	0.967
UniRef90_A0A174MZL4	0.746	0.769	0.667	0.984	1	0.737	0.2	0.031	0.579
UniRef90_D4LY56	0.58	0.56	0.548	0.938	0.688	0	0	0.781	0.438
UniRef90_D1PK67	0.435	0.451	0.238	0.906	0.688	0.105	0	0.031	0.529
UniRef90_A0A396DXA9	1	0.989	1	0.984	1	0.895	0	0.844	0.76
UniRef90_A0A174I2V0	1	0.989	1	1	1	1	1	0.875	0.917
UniRef90_A0A3E2VAI1	0.732	0.703	0.571	0.984	0.938	0.632	0	0.094	0.116
UniRef90_A0A3E4WLB1	0.993	0.989	1	0.984	1	1	0	0.562	0.777
UniRef90_W5R5G6	0.862	0.846	0.81	1	1	0.947	0	1	0.95
UniRef90_B6FU96	0.775	0.835	0.786	0.969	1	0.789	0.4	0	0
UniRef90_A0A0S2W8L4	0.935	0.923	0.881	0.953	1	0.474	0	0	0.785
UniRef90_A0A174GDC6	0.964	0.956	1	0.969	0.875	0.158	0	0.812	0.083
UniRef90_A0A0K6BQY7	1	0.989	1	1	1	0.263	0	0.594	0.306
UniRef90_E2SL03	0.949	0.923	0.881	1	0.938	0.895	0	0	0.066
UniRef90_F3PGU7	0.993	0.989	1	0.969	1	0.211	0	0.844	0.05
UniRef90_F4XGR7	0.819	0.824	0.714	1	1	0.842	0.6	0	0.545
UniRef90_A0A139KHM0	0.87	0.846	0.857	0.922	0.688	0.053	0	0.469	0.025
UniRef90_A0A174VPV8	1	0.989	1	1	1	0.263	0	0.844	0.686
UniRef90_A0A174ZSN8	0.775	0.791	0.786	0.922	1	0.789	0.333	0	0
UniRef90_A0A0M6X082	0.935	0.879	0.786	1	0.875	0.842	0	0	0
UniRef90_A0A0M6WYS0	0.659	0.648	0.405	0.906	0.812	0.895	0.133	0.375	0.091
UniRef90_C0FTB2	0.935	0.934	0.81	1	0.875	0.895	0.733	0.656	0.182
UniRef90_A0A1G5IKK1	0.739	0.714	0.762	0.984	0.812	0.895	1	0.906	0.694
UniRef90_I3YNZ8	1	0.989	1	0.984	0.938	0.211	0	0	0.058
UniRef90_A0A0M6WQV4	0.848	0.791	0.762	1	0.938	0.842	0.267	0	0.017
UniRef90_A0A174XDQ1	0.587	0.538	0.619	0.938	0.938	0.053	0	0.406	0.248
UniRef90_R5UBJ0	0.906	0.868	0.857	0.984	0.938	0.053	0	0.938	0.661
UniRef90_A7LS51	0.928	0.868	0.929	0.938	0.875	0.105	0	0.219	0.132
UniRef90_Q89Z59	0.964	0.956	1	0.953	1	0.684	0.6	0.844	0.686
UniRef90_A8SAG0	0.877	0.835	0.714	0.984	0.875	1	0	0	0
UniRef90_C7H9F8	0.812	0.868	0.714	1	0.812	0.947	0	0	0.017
UniRef90_A0A0M6WL63	0.942	0.956	0.857	1	1	1	1	1	0.628
UniRef90_A0A1E3UNY3	0.92	0.934	0.857	1	0.875	0.947	0	0	0.017
UniRef90_A0A174CRA0	0.746	0.747	0.643	0.984	1	0.842	0.333	0.094	0.43
UniRef90_C0FPL1	0.522	0.527	0.476	0.984	0.75	0.421	0.333	0	0
UniRef90_I0PY39	0.725	0.725	0.81	0.938	0.812	0.053	0	0.031	0
UniRef90_D4LZX1	0.775	0.747	0.714	0.984	0.812	0.737	0	0	0
UniRef90_Q5L923	1	0.989	1	1	1	0.263	0	0.844	0.744
UniRef90_H1B4W0	0.957	0.967	0.929	0.984	1	0.316	0	0.094	0.835
UniRef90_A0A396FKF2	0.92	0.912	0.905	1	1	0.947	0	0	0.066
UniRef90_C0FW47	0.971	0.978	0.905	1	0.938	0.842	0	0.406	0.711
UniRef90_A0A396E540	0.986	0.967	1	0.953	1	0.789	0	0.625	0.149
UniRef90_C6LDC9	0.906	0.868	0.762	1	1	0.053	0	0.906	0.314
UniRef90_A0A2A7A4I8	0.913	0.934	0.738	1	0.875	0.737	0.067	0	0
UniRef90_A0A139KJ27	0.877	0.857	0.857	0.906	0.812	0.158	0	0.5	0.041
UniRef90_W6PFQ9	0.993	0.978	1	0.969	0.938	0.526	0	0.75	0.702
UniRef90_E5UZS2	0.942	0.956	0.929	0.969	0.875	0.053	0	0.844	0.033
UniRef90_A7LS52	0.964	0.934	0.952	0.844	0.75	0.211	0	0.5	0.008
UniRef90_D4M3P7	0.746	0.714	0.595	0.953	0.875	0.789	0.333	0	0.033
UniRef90_A7V8X8	0.848	0.791	0.857	0.906	0.75	0.158	0	0.406	0.017
UniRef90_A0A174WN42	0.529	0.648	0.619	0.891	0.812	0.105	0.067	0.938	0.488
UniRef90_C6JA81	0.732	0.736	0.738	0.984	0.688	0.842	0.2	0.156	0.017
UniRef90_S2Z5G6	0.725	0.747	0.571	0.953	0.875	0.684	0	0	0.38
UniRef90_R7KY57	0.899	0.846	0.857	0.984	0.812	0.842	0	0	0.446
UniRef90_D4KJY8	0.833	0.846	0.738	1	0.938	0.053	0	0.719	0
UniRef90_A0A139K338	0.884	0.868	0.857	0.953	0.875	0.211	0	0.531	0.165
UniRef90_D4JZY7	0.804	0.791	0.738	0.906	0.812	0.947	0	0.062	0.289
UniRef90_R5UQI8	0.949	0.857	0.881	1	1	0.895	0	0	0
UniRef90_A0A174S2R0	0.768	0.769	0.738	1	1	0.158	0	0	0.496
UniRef90_A4EBI3	0.58	0.725	0.69	0.984	0.875	1	1	1	0.934
UniRef90_A0A133PZY0	0.877	0.846	0.857	0.5	1	0.895	0	0	0.562
UniRef90_D4LFS1	0.783	0.725	0.405	0.984	0.875	0.684	0	0	0
UniRef90_A0A395X6W3	0.841	0.813	0.738	1	0.875	0.579	0	0	0.091
UniRef90_A0A173TXT3	0.862	0.857	0.786	0.984	0.938	0.947	0	0	0.116
UniRef90_A0A396FRL5	0.841	0.912	0.81	1	0.812	0.684	0.4	0.5	0.017
UniRef90_A0A212K361	0.957	0.945	0.905	0.938	0.812	0.947	1	0.812	0.736
UniRef90_A0A174M0G2	0.58	0.56	0.571	0.953	0.875	0.842	0	0	0
UniRef90_UPI0004727077	0.812	0.758	0.905	0.531	0.75	0	0	0.531	0.818
UniRef90_F7KH42	0.957	0.978	0.929	1	0.875	0.947	0	0	0.107
UniRef90_D4L465	0.949	0.89	0.905	0.984	0.875	0.684	0	0	0
UniRef90_D4MLS7	0.659	0.659	0.571	0.969	0.812	0.895	0	0	0.306
UniRef90_A0A1Y3ZPU5	0.297	0	0	0.906	0.75	0	0	0.781	0
UniRef90_A0A396FMV1	0.797	0.747	0.786	0.984	1	0.947	0	0	0.116
UniRef90_A0A285PRD6	0.732	0.714	0.571	1	0.875	0.632	0.067	0	0
UniRef90_U6RQ77	0.775	0.758	0.857	0.969	0.812	0.158	0	0.5	0.603
UniRef90_A0A0K9NBB8	0.957	0.956	0.905	1	1	0.842	0	0	0
UniRef90_U2PTN3	0.906	0.901	0.833	1	0.938	1	0.6	0	0.256
UniRef90_I3YNY6	0.964	0.901	0.881	0.969	0.75	0.158	0	0.719	0.025
UniRef90_C4ZEY5	0.746	0.692	0.69	0.922	0.812	0.526	0	0	0
UniRef90_D4JMB0	0.935	0.912	0.857	1	1	1	0.667	0.375	0.479
UniRef90_D4KXU9	0.913	0.89	0.81	1	0.812	0.105	0	0.219	0
UniRef90_A0A1Y3ZEQ7	0.993	0.956	1	0.969	0.875	0.368	0.067	0.656	0.471
UniRef90_E4MEI2	0.913	0.879	0.857	0.984	0.875	0.105	0	0.938	0.587
UniRef90_G9WKL6	0.841	0.923	0.833	1	0.875	1	1	0.719	0.678
UniRef90_A0A078RZM2	0.877	0.835	0.833	0.953	0.875	0.158	0	0.312	0.025
UniRef90_A8S6U8	0.667	0.604	0.548	1	0.812	0.368	0	0	0
UniRef90_D4K6M8	0.652	0.626	0.548	0.969	0.875	0.684	0	0	0.099
UniRef90_C7GB63	0.71	0.714	0.643	0.984	0.625	0.737	0.133	0.25	0.066
UniRef90_C6LD81	0.906	0.934	0.881	1	0.938	1	0.133	0.219	0.678
UniRef90_A0A0A2FIM1	0.884	0.89	1	0.969	1	0.947	0	0	0.694
UniRef90_A0A015P2L2	0.935	0.956	0.905	0.953	0.938	0.789	0	0.75	0.091
UniRef90_R5UB99	0.906	0.879	0.857	1	0.875	0.158	0	0.938	0.669
UniRef90_F7KH41	0.949	0.978	0.952	1	0.938	0.947	0	0	0.182
UniRef90_A0A174M3V9	0.609	0.516	0.571	0.906	0.75	0.842	0	0	0.017
UniRef90_C0FRS6	0.746	0.758	0.714	0.938	1	0.579	0.333	0	0.041
UniRef90_A0A0D8IWP6	0.906	0.923	0.857	1	0.875	0.947	0.133	0	0.025
UniRef90_A0A173UL76	0.826	0.879	0.762	1	0.812	1	0	0	0.017
UniRef90_A0A173V6Z4	0.971	0.978	0.952	1	1	1	0	0	0
UniRef90_A0A2J4JK05	0.841	0.846	0.667	0.984	0.875	1	0	0	0
UniRef90_A0A396A0I9	0.623	0.67	0.5	0.906	0.812	0.211	0	0	0
UniRef90_A0A174DC02	0.971	0.934	0.976	1	0.938	0.053	0	0.062	0
UniRef90_R9JHQ9	0.812	0.879	0.881	0.859	0.75	0.474	0	1	0.38
UniRef90_A0A174TAR1	0.884	0.879	0.881	0.938	0.75	0.211	0	0.406	0.066
UniRef90_R6Y875	1	0.978	0.952	0.969	1	0.211	0	0	0.165
UniRef90_R5UC62	0.913	0.879	0.881	0.984	0.875	0.105	0	1	0.686
UniRef90_F3PTR4	1	0.989	1	1	1	0.316	0.533	0.812	0.653
UniRef90_R7NWF7	1	0.989	1	0.984	1	0.579	0.267	0.844	0.76
UniRef90_D4L152	0.609	0.615	0.69	0.938	0.875	0.684	0	0	0
UniRef90_A0A174J5J5	0.957	0.945	0.952	0.984	0.875	0.105	0	0	0.463
UniRef90_A0A139K2N8	0.935	0.923	0.929	0.984	0.875	0.263	0	0.5	0.438
UniRef90_G9RSP7	0.87	0.901	0.881	1	0.875	0.684	0.8	0.375	0.711
UniRef90_A0A3E4G1I0	0.87	0.835	0.857	0.906	0.625	0.211	0	0	0.041
UniRef90_A0A174KPV5	1	0.989	1	1	1	0.316	0.467	0.781	0.669
UniRef90_A7VRM9	0.891	0.945	0.857	1	1	1	0.733	1	0.612
UniRef90_E6SRC4	1	0.989	1	0.984	1	0.368	0.067	0.781	0.711
UniRef90_A0A1H4BVR5	0.993	0.967	1	0.969	1	0.737	0	0.469	0.769
UniRef90_C0B5T7	0.964	0.978	1	1	1	1	1	1	0.711
UniRef90_A0A078RWY3	0.841	0.802	0.857	0.906	0.75	0.053	0	0.281	0.025
UniRef90_E9SER7	0.79	0.747	0.714	0.984	0.812	0.947	0.933	0.844	0.314
UniRef90_R5UHY5	0.913	0.879	0.881	1	0.938	0.158	0	1	0.678
UniRef90_A0A395V4J0	0.964	0.945	0.952	1	1	0.895	0	0	0.678
UniRef90_A0A174RDH8	0.935	0.934	0.905	1	1	1	0.2	0	0.562
UniRef90_A0A367GEJ7	0.732	0.78	0.762	0.938	0.75	0.684	0	0	0
UniRef90_Q8A135	1	0.989	1	1	1	0.316	0	0.812	0.678
UniRef90_D1PNJ6	0.891	0.934	0.833	1	0.875	1	0.133	0	0.76
UniRef90_C7H6V3	0.855	0.89	0.81	0.984	0.812	1	0	0	0.017
UniRef90_D4JEF3	0.906	0.89	0.881	1	0.938	0.053	0	0	0.223
UniRef90_Q8A463	0.993	0.978	1	1	1	0.737	1	1	0.76
UniRef90_B0G6W4	0.92	0.868	0.833	0.984	0.875	0.895	0	1	0.347
UniRef90_A8SC54	0.862	0.868	0.786	0.969	0.875	0.895	0	0	0
UniRef90_D4JJ88	0.399	0.308	0.238	0.922	0.938	0.737	0.867	0.375	0.727
UniRef90_R5CHH0	0.978	0.978	1	0.984	0.938	0.158	0	0.5	0.694
UniRef90_E8LCS7	0.703	0.637	0.548	0.938	0.875	0.842	0	0	0.455
UniRef90_A0A174B4X8	0.826	0.813	0.762	0.984	0.812	0.947	0.133	0	0
UniRef90_C0FV99	0.725	0.879	0.905	0.984	0.625	0.947	0	0	0.331
UniRef90_C7H578	0.87	0.912	0.786	1	0.938	0.947	0	0	0
UniRef90_A0A2A7AA08	0.775	0.692	0.643	0.953	0.812	0.421	0	0	0
UniRef90_A0A329U6V2	0.5	0.571	0.5	0.938	0.562	0.895	0.067	0.188	0.033
UniRef90_A0A174FMW6	0.891	0.901	0.786	1	0.75	1	0	0.062	0.264
UniRef90_R6ELW1	0.739	0.714	0.738	1	0.75	1	0	0.062	0
UniRef90_G2T4S6	0.949	0.989	0.833	1	1	0.421	0	0	0.033
UniRef90_A0A078S054	0.848	0.813	0.833	0.922	0.688	0.211	0	0.438	0.033
UniRef90_A0A285PST4	0.674	0.615	0.619	0.984	1	0.895	0	0	0.017
UniRef90_W1I3U0	0.471	0.352	0.19	0.828	0.438	0.579	1	0	0.248
UniRef90_A0A2A7AHE6	0.899	0.89	0.714	1	0.875	1	0.133	0	0.628
UniRef90_A0A396F0F1	0.986	0.956	0.952	1	0.875	0.263	0	0.031	0.008
UniRef90_A8S985	0.819	0.758	0.738	1	0.875	0.895	0	0	0.008
UniRef90_B0MSH3	0.899	0.868	0.857	0.969	0.938	0.053	0.067	0.781	0.686
UniRef90_A0A2A7BHU0	0.761	0.857	0.667	1	0.875	0.947	0.133	0.031	0.157
UniRef90_B9YBY2	0.688	0.923	0.595	0.859	0.812	0.316	0	0.938	0.157
UniRef90_Q6WS07	0.732	0.703	0.714	0.969	0.75	0.737	0.133	0	0.05
UniRef90_A0A0M6WC50	0.739	0.802	0.738	0.938	0.625	0.474	0.067	0	0
UniRef90_E8LCS8	0.833	0.78	0.714	1	0.938	0.947	0.067	0	0.669
UniRef90_R5V322	0.913	0.89	0.881	1	0.875	0.105	0	1	0.678
UniRef90_Q6WS03	0.732	0.703	0.619	0.906	0.625	0.895	0.133	0.125	0.008
UniRef90_C4Z239	0.92	0.89	0.833	1	0.875	0.737	0	0	0
UniRef90_A0A173RU09	0.399	0.374	0.429	0.969	0.875	0.579	0.067	0.188	0.008
UniRef90_C6JA66	0.725	0.681	0.667	0.953	0.75	0.737	0.133	0.125	0.058
UniRef90_T4BVE4	0.986	0.967	1	0.953	0.875	0.158	0.067	0	0.025
UniRef90_A0A127SAM3	0.949	0.945	0.952	0.984	0.875	0.526	0	0.094	0.835
UniRef90_E6SNS4	0.993	0.967	1	0.969	0.875	0.263	0	0.5	0.256
UniRef90_A0A0M6WMR8	0.833	0.835	0.81	0.984	0.875	0.842	0.133	0.188	0
UniRef90_A0A174P5U2	0.906	0.857	0.881	1	0.938	0.105	0	0.938	0.645
UniRef90_A0A329UUU7	0.826	0.824	0.786	1	0.812	0.947	0	0	0.041
UniRef90_B7AWJ3	0.906	0.879	0.81	1	0.875	0.947	0	0	0
UniRef90_I9IRV8	0.884	0.89	0.929	0.953	0.875	0.158	0	0.719	0
UniRef90_B0G4Z3	0.906	0.868	0.952	1	1	1	0.933	0.969	0.678
UniRef90_C4ZEQ8	0.92	0.868	0.833	1	0.938	0.789	0	0.438	0.421
UniRef90_I9JB29	1	0.989	1	1	1	0.316	0.133	0.75	0.727
UniRef90_D4IQR3	0.913	0.868	0.881	0.969	0.938	0.105	0.133	1	0.686
UniRef90_U2PFK4	0.783	0.758	0.619	0.984	0.812	1	1	0.188	0
UniRef90_H1B777	0.442	0.549	0.286	0.938	0.625	0.053	0	0.125	0.636
UniRef90_A0A139K2N3	0.841	0.824	0.857	0.906	0.75	0.158	0	0.344	0.041
UniRef90_B6VX47	0.928	0.901	0.905	0.953	0.812	0.158	0	0.719	0.008
UniRef90_C7H665	0.812	0.736	0.69	0.984	0.875	0.895	0	0	0
UniRef90_Q8A0Z3	1	0.989	1	1	0.938	0.263	0	0.812	0.083
UniRef90_B6FU81	0.768	0.747	0.762	0.922	0.938	0.579	0.333	0	0
UniRef90_R6XWD1	0.913	0.89	0.881	1	0.938	0.105	0	1	0.686
UniRef90_R5J0A3	1	0.989	1	1	1	0.316	0.533	0.781	0.702
UniRef90_Q8A9S3	1	0.989	1	1	1	0.263	0.333	0.781	0.736
UniRef90_Q8AAG5	1	0.989	1	1	1	0.263	0	0.844	0.372
UniRef90_F4XGQ5	0.775	0.846	0.762	1	1	0.842	0.533	0	0.612
UniRef90_Q8A479	0.993	0.978	1	1	1	0.368	0.867	0.844	0.711
UniRef90_A0A120A3C2	1	0.989	1	0.984	1	0.263	0	0.844	0.702
UniRef90_D4J5X8	0.768	0.736	0.762	0.938	1	0.684	0.4	0	0
UniRef90_R5UMZ5	0.906	0.89	0.881	1	0.938	0.211	0	0.938	0.669
UniRef90_A0A173X6V6	0.978	0.967	0.952	1	1	1	0	0	0
UniRef90_D4JEF1	0.899	0.879	0.881	0.984	1	0.053	0	0	0.331
UniRef90_A0A078QYW1	0.848	0.89	0.929	0.875	0.688	0.158	0	0.812	0
UniRef90_R6K3Z5	1	0.989	1	1	1	0.474	0.467	0.812	0.678
UniRef90_D4J5Y5	0.768	0.78	0.786	0.922	1	0.737	0.267	0	0
UniRef90_Q8A1D5	1	0.989	1	1	1	0.263	0.267	0.781	0.736
UniRef90_A0A3E4KLQ4	1	0.989	1	0.984	1	0.211	0.333	0.812	0.579
UniRef90_A0A173RTN3	0.884	0.901	0.905	1	0.938	0.526	0.067	0	0
UniRef90_C9KZY2	0.935	0.967	0.905	0.891	0.938	0.053	0	0.094	0.587
UniRef90_A0A069SCE7	0.812	0.813	0.905	0.859	0.938	0.842	0	0	0.298
UniRef90_A0A015T2R2	0.935	0.879	0.881	0.984	1	0.368	0	0.812	0.562
UniRef90_G2SYV9	0.841	0.846	0.69	1	0.938	0.789	0	0	0.05
UniRef90_A0A1Q6ICG6	0.877	0.879	0.857	0.938	0.812	0.211	0.267	0.438	0.14
UniRef90_Q8A9A8	1	0.989	1	1	1	0.263	0	0.781	0.562
UniRef90_C7H9Z2	0.797	0.824	0.69	1	0.812	0.947	0	0	0
UniRef90_A0A3E4E7J9	0.92	0.945	0.881	1	0.938	0.947	0	0	0.025
UniRef90_A0A0P0M1Z2	0.986	0.978	1	0.984	0.875	0.158	0	0.844	0.612
UniRef90_Q8A6N4	1	0.989	1	1	1	0.316	0.2	0.844	0.727
UniRef90_A0A0B0BWV9	0.899	0.89	0.857	1	0.938	0.158	0.8	0.812	0.62
UniRef90_E4VQT4	0.957	0.967	0.905	1	0.938	0.368	0.867	0.844	0.446
UniRef90_D4JBJ4	0.768	0.769	0.69	0.984	0.875	0.211	0	0.125	0.124
UniRef90_A0A2A7APG6	0.92	0.89	0.762	1	0.875	0.789	0	0	0
UniRef90_A0A133PRA6	0.899	0.912	0.905	0.938	0.875	0.579	0	0.75	0.099
UniRef90_A0A078S1V2	0.848	0.857	0.857	0.906	0.625	0.105	0	0.469	0.033
UniRef90_A0A174UML5	0.928	0.967	0.929	0.969	1	0.947	0	0.344	0.256
UniRef90_A0A139KHH7	1	0.989	1	0.984	1	0.316	0.067	0.812	0.669
UniRef90_G2T1L5	0.899	0.879	0.833	1	0.812	0.842	0.6	0	0
UniRef90_C4ZA21	0.841	0.813	0.833	0.938	0.75	0.684	0	0	0
UniRef90_R5HGK9	0.688	0.429	0.024	1	0.938	0.211	0	0	0.132
UniRef90_Q8A468	1	0.989	1	1	1	0.895	0.933	0.781	0.769
UniRef90_D4JJ93	0.812	0.681	0.738	0.953	1	0.895	0	0.719	0.397
UniRef90_A5KN82	0.746	0.681	0.571	0.922	0.688	0.474	0.067	0.531	0.008
UniRef90_D1PJ32	0.87	0.934	0.786	1	0.938	0.842	0	0	0.264
UniRef90_C0EYV5	0.92	0.923	0.857	1	0.938	0.842	0.333	0	0.008
UniRef90_R5UH37	0.913	0.89	0.881	0.984	0.938	0.105	0.4	1	0.661
UniRef90_C0B613	0.79	0.791	0.714	1	1	0.579	0	0	0
UniRef90_A0A2A7BAQ9	0.812	0.868	0.738	0.969	0.938	0.684	0.667	0	0.124
UniRef90_B0MW94	0.899	0.879	0.881	0.984	0.875	0.105	0	1	0.587
UniRef90_F4XGQ0	0.71	0.791	0.571	0.984	1	0.842	0.333	0	0.612
UniRef90_R6L9G3	0.935	0.912	0.929	0.969	0.875	0.158	0	0.531	0.702
UniRef90_A0A3E4UFP1	0.862	0.813	0.905	0.766	0.688	0.211	0	0.719	0.248
UniRef90_D1PNJ1	0.87	0.934	0.833	1	0.875	1	0.333	0.031	0.769
UniRef90_A7UYM4	0.913	0.879	0.881	0.984	0.938	0.211	0	0.688	0.289
UniRef90_A0A175A5X1	0.717	0.615	0.595	0.953	0.875	1	0	0.031	0
UniRef90_Q8A2S4	1	1	1	1	1	0.316	0.2	0.844	0.157
UniRef90_F3PTU7	0.884	0.879	0.881	0.922	0.812	0.158	0	0.531	0.033
UniRef90_U2D6D2	0.529	0.582	0.619	0.984	0.688	0.579	0.733	0.031	0.033
UniRef90_A8SDJ6	0.725	0.692	0.476	0.969	0.812	0.579	0	0	0
UniRef90_A6BGB7	0.768	0.802	0.69	0.953	1	0.737	0.333	0	0
UniRef90_E5X0R1	0.899	0.901	0.881	0.922	0.875	0.211	0	0.438	0.512
UniRef90_A0A2A6ZSN0	0.862	0.802	0.714	0.969	0.875	0.421	0	0	0.124
UniRef90_A5ZBN0	0.761	0.813	0.619	0.828	0.812	1	0.933	0.719	0.802
UniRef90_G1WUV0	0.855	0.934	0.786	1	0.938	0.947	0.067	0.469	0.793
UniRef90_A6BGA7	0.804	0.824	0.786	0.953	1	0.789	0.333	0	0
UniRef90_A0A329UPM4	0.899	0.923	0.881	1	0.875	0.895	0	0	0
UniRef90_A0A176U3W1	0.862	0.846	0.667	1	0.875	0.895	0.2	0	0.017
UniRef90_A0A139KH84	0.877	0.857	0.857	0.938	0.75	0.158	0	0.438	0.05
UniRef90_A0A396A2D2	0.435	0.648	0.548	0.922	0.938	1	0.133	0	0.736
UniRef90_A0A174M4W1	0.949	0.923	0.881	1	0.938	1	0	0.062	0.008
UniRef90_F4XGQ3	0.754	0.791	0.738	0.953	0.938	0.895	0.467	0	0.504
UniRef90_D6DYV3	0.935	0.857	0.833	1	0.812	0.842	0	0	0
UniRef90_C0B5I1	0.543	0.516	0.643	0.984	0.938	0.421	0	0	0
UniRef90_A0A397WFB7	0.964	0.956	1	0.953	0.812	0.211	0	0.844	0.058
UniRef90_G2T3U0	0.841	0.78	0.738	0.969	0.938	0.947	0.733	0	0.124
UniRef90_A6L171	1	1	1	0.984	1	0.158	0.4	0.844	0.645
UniRef90_A0A173VSR0	0.739	0.659	0.571	0.922	0.688	0.263	0	0	0
UniRef90_A0A3E2Y7W5	0.877	0.846	0.857	1	0.938	0.158	0	0	0.231
UniRef90_R6TMV6	0.783	0.835	0.786	0.922	0.688	0.526	0.067	0	0
UniRef90_A0A076YTG9	0.696	0.692	0.714	0.938	0.812	0.526	0.133	0.344	0.05
UniRef90_A0A395UUP2	0.63	0.637	0.595	0.906	0.875	0.368	0.733	0.125	0
UniRef90_A0A0S2W775	0.957	0.978	0.929	1	1	0.842	0	0.312	0.901
UniRef90_A0A174VVK3	0.79	0.791	0.643	0.984	1	0.842	0.6	0.094	0.397
UniRef90_A0A174Q9G9	0.986	0.967	1	0.953	0.875	0.158	0	0	0.025
UniRef90_D4LFN8	0.819	0.78	0.643	0.984	0.875	0.789	0	0	0
UniRef90_A0A0M6W9V3	0.768	0.78	0.762	0.906	0.75	0.421	0	0	0
UniRef90_C7H3F9	0.645	0.626	0.619	1	0.875	0.895	0	0	0.008
UniRef90_D1K071	0.957	0.945	1	0.953	0.75	0.158	0	0.812	0.008
UniRef90_A0A078R093	0.964	0.945	1	0.953	0.812	0.158	0	0.844	0.008
UniRef90_A0A174T2A6	0.993	0.978	1	1	1	0.368	0.133	0.781	0.727
UniRef90_A0A329TPK5	0.92	0.956	0.81	1	0.875	1	1	0.219	0.752
UniRef90_R7C9H1	0.638	0.582	0.571	0.938	0.625	0.737	0	0	0
UniRef90_A0A2A7APJ8	0.797	0.802	0.738	0.969	0.875	0.842	0	0	0.008
UniRef90_A0A139K7N7	1	0.989	1	1	0.938	0.263	0	0.781	0.62
UniRef90_A0A3E4GTS2	0.703	0.681	0.548	0.938	0.875	0.421	0	0	0.231
UniRef90_C7H6Y4	0.877	0.923	0.81	1	0.875	0.526	0	0.25	0.57
UniRef90_A0A174SF86	0.855	0.846	0.786	1	1	0.895	0.133	0	0.008
UniRef90_R7EI38	1	0.989	1	1	1	0.263	0.133	0.812	0.769
UniRef90_F3PHR0	1	0.989	1	0.984	0.938	0.263	0	0.719	0.628
UniRef90_Q8A489	1	0.989	1	1	1	0.789	0.4	0.812	0.669
UniRef90_C3RFN5	0.913	0.912	0.952	0.859	1	0.211	0.867	0	0.025
UniRef90_U2R7I4	0.949	0.956	0.952	1	1	1	1	1	0.727
UniRef90_C7H3I1	0.935	0.967	0.929	1	1	0.947	0.133	0.594	0.884
UniRef90_A7AZJ6	0.812	0.714	0.619	0.938	0.812	0	0	0	0
UniRef90_A0A173YA79	0.964	0.978	0.905	1	0.938	0.947	0	0.469	0.694
UniRef90_U2DZN0	1	0.989	1	0.984	1	0.263	0	0.75	0.554
UniRef90_R7H386	0.775	0.758	0.738	1	1	1	1	1	0.595
UniRef90_R6Q0Q6	0.884	0.967	0.833	1	0.875	1	0	0	0.793
UniRef90_D4J5X4	0.79	0.857	0.81	0.969	1	0.789	0.4	0.094	0.017
UniRef90_A0A396EWM2	0.884	0.857	0.857	0.906	0.75	0.158	0	0.375	0.091
UniRef90_A0A017NFD2	0.913	0.857	0.929	0.922	1	0	0	0.594	0.835
UniRef90_A0A174PVT9	0.928	0.934	0.857	1	0.938	0.947	0.533	0	0
UniRef90_A0A0K6BYK2	0.935	0.934	0.952	0.969	0.938	0.211	0	0.594	0.587
UniRef90_F7KHD2	0.761	0.835	0.69	1	0.875	0.632	0	0.438	0.62
UniRef90_R9HIX9	0.986	0.989	1	0.969	1	0.947	0	0.75	0.264
UniRef90_R5JD85	1	0.989	1	1	1	0.211	0	0.719	0.537
UniRef90_F7K2G6	0.754	0.747	0.762	1	1	0.105	0	0	0.041
UniRef90_Q5L7Z7	1	0.989	1	1	1	0.316	0.333	0.812	0.702
UniRef90_F7LJ47	1	0.989	1	1	1	0.316	0	0.781	0.074
UniRef90_C5EWP5	0.942	0.934	0.857	0.984	0.938	1	0	0.969	0.488
UniRef90_B0P879	0.92	0.846	0.833	1	0.812	0.632	0	0	0.066
UniRef90_A9KRZ1	0.986	0.989	1	1	1	1	1	1	0.826
UniRef90_A7AZK8	0.971	0.945	0.952	1	0.938	0.842	0	0.062	0.545
UniRef90_A0A139JSS0	0.899	0.879	0.881	0.953	0.875	0.158	0	0.438	0.058
UniRef90_A0A176U3T1	0.623	0.659	0.524	1	0.75	0.316	0.067	0.031	0.033
UniRef90_A0A174ARN5	0.862	0.901	0.833	1	0.875	1	0.067	0	0.678
UniRef90_E4MEM1	0.993	0.967	0.976	0.984	0.938	0.105	0	0.844	0.041
UniRef90_A0A174GT87	1	0.989	1	1	1	0.316	0	0.812	0.727
UniRef90_P22841	1	0.989	1	1	1	0.632	0.933	0.75	0.777
UniRef90_A0A0M6WV69	0.79	0.824	0.762	0.922	0.688	0.579	0.067	0	0
UniRef90_Q8A9E3	1	0.989	1	1	1	0.368	0.4	0.812	0.744
UniRef90_Q8A4A3	0.993	0.978	1	0.984	1	0.316	0	0.812	0.711
UniRef90_C7H8M5	0.906	0.912	0.881	1	0.938	0.842	0.2	0	0
UniRef90_A0A0P0G9A9	1	0.989	1	1	1	0.211	0	0.812	0.066
UniRef90_A0A173V8A3	0.928	0.923	0.881	1	0.812	0.947	0	0	0
UniRef90_A0A139KIL6	0.877	0.868	0.833	0.922	0.812	0.158	0	0.406	0.033
UniRef90_V2Y738	0.812	0.747	0.667	0.969	0.938	0.684	0.067	0.75	0.099
UniRef90_R5UDC8	0.891	0.89	0.881	0.938	0.875	0.263	0.467	0.531	0.669
UniRef90_D4KU18	0.87	0.846	0.786	1	0.938	0.895	1	0	0.471
UniRef90_A6LH06	0.92	0.89	0.905	0.953	0.938	0.158	0	0.125	0.017
UniRef90_A0A3E4VXM1	1	0.989	1	1	1	0.263	0.133	0.781	0.736
UniRef90_D4K7N6	0.819	0.725	0.571	0.953	0.812	0.684	0	0	0
UniRef90_A0A367G919	0.616	0.67	0.595	0.906	0.75	0.316	0	0	0
UniRef90_A0A173VNX7	0.935	0.912	0.929	0.938	0.938	0.526	0	0	0.76
UniRef90_A0A3E4I5X3	1	0.989	1	1	1	0.263	0	0.781	0.645
UniRef90_A0A3E4USB5	0.855	0.813	0.952	0.703	1	0.053	0	0.25	0.843
UniRef90_Q8A012	1	0.989	1	1	1	0.368	0	0.781	0.686
UniRef90_A0A0M6WYP3	0.42	0.33	0.214	0.719	0.688	0.526	0.133	0.906	0.017
UniRef90_U2DKD6	0.935	0.956	0.905	1	0.938	0.947	0	0	0
UniRef90_A8S7S0	0.928	0.879	0.81	1	0.875	0.947	0	0	0
UniRef90_A0A395X3P0	0.928	0.89	0.976	1	0.875	0.316	0	0	0.215
UniRef90_A0A2A7AQV4	0.877	0.912	0.81	0.969	0.875	0.895	0	0	0.107
UniRef90_A0A174SMM2	0.341	0.231	0.214	0.938	0.688	0.632	0	0	0
UniRef90_A7AJ68	0.906	0.868	0.905	0.875	0.875	0.158	0	0.031	0.008
UniRef90_A0A3E4LVW0	0.681	0.692	0.667	0.969	0.812	0.632	0	0	0
UniRef90_R6KLQ9	0.964	0.956	0.952	1	1	0.158	0	0.438	0.504
UniRef90_A7VI39	0.913	0.89	0.833	1	0.938	0.895	0.067	0	0
UniRef90_E2ZNX7	0.891	0.857	0.762	0.984	0.875	0.895	0	0	0
UniRef90_A5ZX27	0.623	0.626	0.524	1	1	0.947	0.467	0.844	0.57
UniRef90_E2ZMJ1	0.688	0.747	0.643	0.953	0.875	0.895	0	0	0
UniRef90_R8W662	0.862	0.835	0.714	1	1	0.789	0.467	0	0.702
UniRef90_A0A174SEG5	0.848	0.802	0.738	1	1	0.947	0.267	0	0.083
UniRef90_C4ZBU2	0.935	0.923	0.929	1	0.938	1	1	0.875	0.669
UniRef90_C6JA57	0.681	0.725	0.714	0.922	0.688	0.526	0.067	0.188	0.025
UniRef90_D4J5W5	0.754	0.813	0.81	0.953	1	0.737	0.333	0	0
UniRef90_A7V046	0.833	0.802	0.857	0.938	0.75	0.158	0	0.469	0.025
UniRef90_A0A1C5XW61	0.855	0.769	0.786	1	0.938	0.632	0	0	0.091
UniRef90_A0A2A7ACZ7	0.957	0.956	0.905	1	1	0.158	0.133	1	0.678
UniRef90_C4ZHG3	0.746	0.703	0.69	0.906	0.875	0.316	0	0	0
UniRef90_Q8A1E9	1	0.989	1	1	1	0.263	0.333	0.844	0.736
UniRef90_B0MZ74	0.826	0.78	0.833	0.938	0.812	0.105	0	0.062	0.017
UniRef90_A0A173XTR7	0.87	0.846	0.714	1	0.875	0.947	0	0	0
UniRef90_R6AJ99	0.935	0.912	0.929	0.969	0.875	0.211	0.067	0.531	0.653
UniRef90_A0A2A7ATM9	0.862	0.835	0.714	0.984	0.875	0.947	0	0	0
UniRef90_R5V317	0.891	0.89	0.881	1	0.938	0.105	0	0.812	0.562
UniRef90_A8SCE3	0.797	0.758	0.643	0.984	0.875	0.263	0	0	0.017
UniRef90_D4JA31	0.37	0.242	0.167	0.922	0.688	0.263	0	0	0
UniRef90_H1AL83	0.797	0.824	0.738	0.969	1	0.947	0.6	0.031	0.694
UniRef90_D4K8Y0	0.862	0.923	0.786	0.984	0.875	1	0	0	0.033
UniRef90_A0A174ZZR7	0.841	0.78	0.714	0.969	0.875	0.053	0	0	0
UniRef90_D6E5T2	0.862	0.813	0.81	0.969	0.812	0.737	0	0	0.008
UniRef90_Q9RQ15	1	0.989	1	1	1	0.211	0	0.719	0.488
UniRef90_A0A2A7AQ57	0.754	0.736	0.524	0.984	0.75	0.579	0	0	0.008
UniRef90_D4JQL7	0.594	0.44	0.476	0.625	0.812	0.947	0.2	0.094	0.843
UniRef90_R5JRC2	0.993	0.978	1	1	1	0.316	0.333	0.781	0.736
UniRef90_W4PMK4	0.993	0.978	1	1	1	0.263	0	0.844	0.562
UniRef90_A6BGD1	0.63	0.67	0.643	0.781	0.938	0.316	0.333	0	0
UniRef90_Q8A5V7	1	0.989	1	1	1	0.263	0	0.75	0.653
UniRef90_K5CBL1	1	0.989	1	0.984	1	0.263	0	0.75	0.678
UniRef90_A0A139KHM2	1	0.989	1	1	1	0.316	0	0.812	0.702
UniRef90_Q5LGS0	1	0.989	1	0.984	1	0.316	0	0.781	0.752
UniRef90_A0A174DU50	0.906	0.912	0.738	1	0.875	0.211	0.133	0	0
UniRef90_B3C522	0.688	0.813	0.833	0.766	0.875	0.684	1	0.969	0.917
UniRef90_R7C793	0.609	0.626	0.5	0.953	0.688	0.737	0.4	0	0
UniRef90_A0A395ZHQ2	0.841	0.857	0.857	0.969	0.812	0.684	0.8	0	0
UniRef90_A0A073I8W5	0.906	0.868	0.786	0.875	0.75	0.105	0	0	0.008
UniRef90_R5MTI9	0.971	0.945	1	0.953	0.812	0.421	0	0.844	0.711
UniRef90_A0A3E2X774	0.819	0.824	0.81	1	0.875	0.947	0.2	0.062	0.273
UniRef90_C0BE67	0.906	0.967	0.976	1	1	0.842	0	0.438	0.917
UniRef90_A0A078SQG7	1	0.978	1	1	1	1	0	0.969	0.752
UniRef90_Q5LI10	1	0.989	1	1	1	0.211	0	0.781	0.661
UniRef90_C7GB50	0.667	0.692	0.738	0.922	0.5	0.421	0.2	0.469	0.19
UniRef90_A0A174GBT9	0.899	0.879	0.881	0.938	0.812	0.211	0	0.438	0.215
UniRef90_A7LRB1	1	0.989	1	1	1	0.316	0.2	0.844	0.727
UniRef90_S2YP78	0.696	0.692	0.571	0.938	0.875	0.737	0	0.031	0.554
UniRef90_C9L7F5	0.797	0.846	0.762	0.984	1	0.737	0	0.969	0.256
UniRef90_U5F5C0	0.949	0.967	0.929	1	1	0.368	0	0.125	0.818
UniRef90_Q8A8P0	0.884	0.868	0.905	0.828	0.812	0.158	0	0.094	0
UniRef90_A0A2A6ZAW7	0.848	0.879	0.762	1	0.875	0.947	1	0.406	0.083
UniRef90_A0A174UXW6	1	0.989	1	1	1	0.316	0	0.781	0.719
UniRef90_A0A139KHL0	0.899	0.879	0.881	0.953	0.812	0.211	0	0.438	0.471
UniRef90_A0A395ZCH9	0.841	0.857	0.786	0.953	0.812	0.579	0.2	0.375	0.041
UniRef90_E6SND0	0.935	0.912	0.952	0.969	1	0.158	0	0.469	0.223
UniRef90_U6RCG3	0.804	0.857	0.762	0.906	0.625	0.474	0	0.844	0
UniRef90_UPI000CF66EED	0.862	0.824	0.786	0.938	0.875	0.211	0	0	0.471
UniRef90_D4JXR4	0.899	0.901	0.833	1	0.938	0.737	0.4	0	0.058
UniRef90_R7JYK6	0.877	0.835	0.762	1	0.938	1	0.667	0.219	0.066
UniRef90_C0FVR5	0.87	0.857	0.714	1	0.812	0.842	0	0	0
UniRef90_R6JI09	0.993	0.978	1	1	1	0.316	0.067	0.844	0.612
UniRef90_R6X734	1	0.989	1	1	0.938	0.263	0.8	0.844	0.636
UniRef90_C4ZES0	0.928	0.912	0.833	1	0.938	1	0	0.812	0.636
UniRef90_A0A396AEL7	0.913	0.945	0.881	1	1	0.947	0.333	0.156	0
UniRef90_I3YHP4	0.906	0.879	0.881	1	0.875	0.105	0	0.938	0.587
UniRef90_A0A174N3M6	0.92	0.901	0.857	1	0.938	0.105	0.133	0.938	0.653
UniRef90_A0A174AUA4	0.906	0.89	0.81	1	0.875	1	0.333	0.031	0.702
UniRef90_D4JA34	0.826	0.802	0.81	1	0.938	0.842	0	0	0.058
UniRef90_D4L2W0	0.855	0.857	0.786	0.984	0.875	0.737	0.467	0.719	0.083
UniRef90_R6RPS3	0.558	0.363	0.429	0.922	0.812	0.158	0	0.094	0
UniRef90_A7UZP6	0.841	0.846	0.857	0.906	0.688	0.158	0	0.375	0.033
UniRef90_C5EWQ2	0.877	0.901	0.738	0.984	1	1	1	1	0.595
UniRef90_D4LWP0	0.891	0.934	0.81	1	1	0.316	0	0	0.719
UniRef90_D4L380	0.92	0.934	0.81	1	1	0.947	0.933	0	0
UniRef90_A0A016DEW0	1	0.989	1	1	1	0.316	0	0.719	0.711
UniRef90_A5KRI7	0.775	0.736	0.786	0.938	0.75	1	0.467	0.969	0.826
UniRef90_A0A016CI08	0.993	0.978	1	0.953	0.938	0.368	0	0.531	0.099
UniRef90_A0A395V2L8	0.833	0.857	0.786	1	0.938	0.842	0	0.469	0.24
UniRef90_C0FTB4	0.812	0.791	0.643	1	0.812	0.947	0.933	0.938	0.149
UniRef90_D4JMT5	0.913	0.89	0.81	1	0.938	1	0.667	0.844	0.19
UniRef90_A0A329TH38	0.92	0.923	0.857	1	0.875	1	0	0	0
UniRef90_Q5LI34	0.986	0.978	1	1	0.938	0.526	0.933	0.562	0.843
UniRef90_S6CPJ7	0.862	0.846	0.786	1	0.938	0.579	0	0	0.38
UniRef90_A0A285PQP0	0.319	0.352	0.238	1	0.812	0.842	0.533	0.594	0.017
UniRef90_A0A395V457	0.949	0.901	0.952	1	1	1	0	1	0.818
UniRef90_A0A078QVM3	0.957	0.945	1	0.953	0.688	0.053	0	0.625	0
UniRef90_R6Y9X7	0.906	0.879	0.881	1	0.938	0.158	0	0.75	0.636
UniRef90_B0G9J5	0.906	0.945	0.881	1	0.938	0.895	0.533	0	0
UniRef90_A0A174P6V1	0.804	0.747	0.762	1	0.875	0.947	0	0	0.504
UniRef90_A0A395X5F0	0.884	0.912	0.833	1	0.938	0.842	0	0	0.017
UniRef90_U6RBH5	0.935	0.934	1	0.797	0.625	0.105	0	0.812	0
UniRef90_A0A2A7B4K8	0.543	0.505	0.452	0.953	0.812	0.842	0.2	0.031	0.124
UniRef90_A0A2A7A133	0.833	0.846	0.762	1	1	0.947	0.6	0.094	0.661
UniRef90_R7DK98	1	0.989	1	1	1	0.263	0.2	0.781	0.479
UniRef90_R6T3M1	0.645	0.56	0.667	0.969	0.875	0.842	0.733	0.469	0.678
UniRef90_D4JY69	0.877	0.945	0.81	1	0.875	1	0.067	0	0.628
UniRef90_R6AK17	1	0.989	1	1	1	0.263	0	0.719	0.793
UniRef90_R5JC86	1	0.989	1	0.984	1	0.211	0	0.781	0.727
UniRef90_A0A174C3B8	0.804	0.791	0.762	0.922	0.75	0.579	0.2	0	0
UniRef90_C4Z9L9	0.812	0.868	0.786	0.953	0.812	0.684	0.6	0.875	0.132
UniRef90_B5CM76	0.717	0.615	0.643	0.969	0.75	0.789	0	0.062	0.074
UniRef90_Q89YY3	1	0.989	1	1	1	0.263	0.267	0.812	0.661
UniRef90_H1ALD0	0.732	0.714	0.595	0.938	0.938	0.684	0.533	0.062	0.471
UniRef90_W0U638	0.688	0.692	0.69	0.953	0.688	0.526	0.067	0	0
UniRef90_F3PVG7	1	0.989	1	1	1	0.263	0	0.781	0.174
UniRef90_A0A139K5P3	0.891	0.879	0.881	0.938	0.875	0.211	0	0.469	0.322
UniRef90_D1KA37	0.971	0.945	1	0.953	0.875	0.158	0	0.844	0.124
UniRef90_C4ZBV2	0.804	0.824	0.833	0.906	0.688	0.526	0.067	0	0
UniRef90_A7M3T1	0.797	0.857	0.738	0.906	0.562	0	0	0.844	0.008
UniRef90_D4LS50	0.957	0.879	0.952	1	0.938	1	0.067	1	0.074
UniRef90_U2CGQ3	1	0.989	1	1	1	0.263	0.133	0.719	0.686
UniRef90_C7H3R1	0.725	0.714	0.69	0.875	0.812	0.947	0	0	0
UniRef90_A0A0K2HFR8	0.971	0.956	1	0.953	0.938	0.158	0	0.844	0.727
UniRef90_D4MWD7	0.783	0.835	0.762	1	1	0.474	0	0	0.653
UniRef90_R6J8M2	1	0.989	1	1	1	0.316	0.067	0.781	0.595
UniRef90_A0A139KJG8	0.855	0.846	0.857	0.938	0.75	0.158	0	0.469	0.05
UniRef90_A0A3E5G3Y1	0.92	0.912	0.905	0.922	0.938	0.632	0.067	0	0.793
UniRef90_A0A174YBK6	0.855	0.813	0.81	0.984	0.875	1	0.8	0.875	0.835
UniRef90_A0A0D8J402	0.855	0.868	0.881	1	0.938	0.789	0	0	0.678
UniRef90_R5M1J0	0.92	0.89	0.929	1	1	1	0.6	0.875	0.736
UniRef90_R6K688	1	0.989	1	1	1	0.263	0.2	0.812	0.744
UniRef90_A0A0P0FSS1	0.949	0.912	0.929	0.984	0.875	0.211	0.533	0.5	0.603
UniRef90_P15623	1	0.989	1	1	1	0.316	0	0.812	0.702
UniRef90_R5K3J5	0.978	0.956	0.929	0.984	1	0.211	0	0.75	0.678
UniRef90_D4J5W9	0.652	0.648	0.595	0.812	0.938	0.474	0.333	0	0
UniRef90_R5DDM8	0.978	0.978	1	0.984	0.938	0.474	1	0.844	0.719
UniRef90_F7LFA0	0.949	0.967	0.976	0.938	0.875	1	0.267	0.375	0.76
UniRef90_A0A396GCE4	0.971	0.978	0.857	0.969	0.812	0.895	0	0.969	0.661
UniRef90_Q5LD96	1	0.989	1	0.984	1	0.316	0.2	0.812	0.777
UniRef90_A0A174S739	0.652	0.714	0.548	1	0.875	0.526	0	0	0
UniRef90_A0A0M6WUK8	0.826	0.703	0.548	0.984	0.812	0.579	0	0	0
UniRef90_R6FT54	1	0.989	1	1	1	0.474	0.133	0.781	0.777
UniRef90_A0A076J5N7	0.986	0.978	1	0.984	0.938	0.474	0.267	0.844	0.562
UniRef90_R7A7Y6	0.623	0.505	0.333	0.734	1	0.105	0	0	0.57
UniRef90_R6NQ72	0.819	0.802	0.762	1	0.875	0.895	0.2	0.156	0.083
UniRef90_A0A2N5NWD5	0.986	1	1	1	1	1	0	0.719	0.273
UniRef90_F4XGN4	0.761	0.725	0.619	0.969	1	0.789	0.467	0.062	0.512
UniRef90_B6FQE1	0.906	0.923	0.905	1	1	0.895	0	0	0
UniRef90_R6KLK7	1	0.989	1	1	1	0.263	0	0.75	0.694
UniRef90_A0A139JY30	0.841	0.791	0.833	0.906	0.688	0.105	0	0.438	0.025
UniRef90_D3AM84	0.812	0.835	0.667	0.969	0.938	0.421	0	0.594	0.62
UniRef90_K9EIH7	0.935	0.912	0.929	0.984	0.875	0.158	0	0.625	0.537
UniRef90_A0A174ARQ5	0.913	0.945	0.905	1	0.938	1	0.2	0.094	0.785
UniRef90_A0A395X7K9	0.717	0.758	0.786	0.969	1	0.737	0.467	0.031	0
UniRef90_Q5L8L7	1	0.989	1	1	1	0.211	0	0.812	0.645
UniRef90_K9E1G2	1	0.989	1	0.984	1	0.263	0	0.781	0.661
UniRef90_U2K7G9	0.862	0.901	0.786	1	0.938	0.789	0	0.281	0.14
UniRef90_E6SV56	0.935	0.912	0.952	0.984	0.875	0.158	0	0.469	0.116
UniRef90_E9RX65	0.819	0.868	0.81	0.922	0.875	0.684	0	0	0.512
UniRef90_A0A173WI84	0.913	0.912	0.881	0.906	0.75	0.211	0	0.531	0.058
UniRef90_A0A2A7BC39	0.841	0.846	0.738	0.969	0.812	0.842	0	0	0
UniRef90_A0A173SXT0	0.884	0.846	0.857	0.984	0.938	0.895	0	0.844	0.843
UniRef90_A0A174CAP2	0.906	0.923	0.857	1	0.938	0.842	0.133	0	0.05
UniRef90_A0A127T6H1	0.935	0.934	1	1	1	0.789	0	0.344	0.901
UniRef90_Q5LG55	1	0.989	1	0.984	1	0.263	0	0.75	0.678
UniRef90_A8SNQ9	0.884	0.846	0.762	0.984	0.75	0.895	0.267	0.062	0
UniRef90_A0A078Q0J4	0.942	0.934	0.786	0.938	0.625	0	0	0	0.008
UniRef90_A0A2A7APR9	0.812	0.846	0.762	1	0.875	1	0	0	0.008
UniRef90_R6TBN0	0.717	0.692	0.69	0.875	0.625	0.947	0.8	0.156	0.579
UniRef90_R5V8Z1	0.906	0.89	0.881	1	0.875	0.105	0	0.656	0.603
UniRef90_Q5LAS7	1	0.989	1	1	1	0.263	0	0.781	0.661
UniRef90_R5MEI2	0.891	0.857	0.81	0.922	0.688	0.158	0	0.5	0.041
UniRef90_R5UBI8	0.913	0.901	0.881	1	0.938	0.211	0.067	1	0.678
UniRef90_D6E4A5	0.616	0.604	0.5	0.938	0.625	0.316	0.133	0	0
UniRef90_D4WFW2	1	0.989	1	1	1	0.263	0	0.719	0.579
UniRef90_B0G312	0.739	0.769	0.595	1	0.812	0.842	0.533	0.625	0.017
UniRef90_S3YUW5	0.935	0.912	0.952	0.984	1	0.158	0	0.688	0.041
UniRef90_A0A076IZE7	0.978	0.956	1	0.953	1	0.105	0.133	0.844	0.397
UniRef90_A0A2A7BFQ8	0.884	0.89	0.762	1	0.875	1	0	0	0.364
UniRef90_Q5LJ28	1	0.989	1	1	1	0.316	0.2	0.812	0.744
UniRef90_Q5L9Q6	1	0.989	1	1	1	0.263	0	0.781	0.62
UniRef90_D4L067	0.884	0.912	0.786	1	0.938	0.105	0	0	0
UniRef90_D4JGR8	0.812	0.824	0.762	0.938	0.75	0.526	0.133	0	0
UniRef90_A6NXQ5	0.783	0.78	0.69	1	0.812	0.737	0	0	0.438
UniRef90_A0A2N5PJM6	0.754	0.78	0.738	0.969	0.875	0.895	0	0.031	0.041
UniRef90_H1ALD3	0.783	0.802	0.619	0.969	1	0.737	0.333	0.094	0.488
UniRef90_A0A139K266	1	0.989	1	1	1	0.263	0	0.781	0.603
UniRef90_D4ML27	0.826	0.813	0.786	0.922	0.938	0.263	0	0.094	0.711
UniRef90_D4J5Y4	0.754	0.725	0.786	0.953	1	0.579	0.333	0	0
UniRef90_E2ZHZ4	0.855	0.923	0.81	0.984	0.875	1	0.2	0.062	0.595
UniRef90_A0A174ASL8	0.862	0.923	0.833	1	0.875	1	0.333	0	0.736
UniRef90_D4INZ2	0.899	0.879	0.881	0.969	0.875	0.158	0.067	0.906	0.719
UniRef90_R6T8E5	0.797	0.802	0.833	0.953	0.75	0.632	0.2	0.312	0.008
UniRef90_D4JJ73	0.884	0.89	0.833	1	0.938	0.842	0	0	0
UniRef90_A0A3E4G8J9	0.935	0.912	0.929	0.984	0.812	0.158	0	0.531	0.273
UniRef90_A0A3E4FZP2	1	0.989	1	1	1	0.316	0.333	0.812	0.777
UniRef90_A0A174JH13	0.986	0.967	1	0.969	0.938	0.263	0	0.844	0.405
UniRef90_A0A3E4GNV5	0.797	0.769	0.762	1	0.875	0.947	0.067	0	0
UniRef90_A0A078R7E6	0.906	0.912	0.952	0.922	0.875	0.368	0	0.812	0.711
UniRef90_A6P1V0	0.761	0.802	0.81	1	1	0.842	0.867	1	0.851
UniRef90_A7AZJ7	0.761	0.769	0.69	0.906	0.812	0.053	0	0.062	0.017
UniRef90_Q8A094	1	0.989	1	1	1	0.316	0	0.812	0.785
UniRef90_E5WVY3	1	0.989	1	1	1	0.263	0	0.656	0.562
UniRef90_A0A3E4VZR9	0.935	0.912	0.929	0.969	0.875	0.211	0	0.469	0.62
UniRef90_J9FXM1	0.341	0.286	0.333	0.875	1	0	0	0.656	0.661
UniRef90_A8SH99	0.862	0.879	0.714	1	0.875	0.789	0	0.844	0
UniRef90_A0A2A6ZAU5	0.717	0.747	0.643	0.984	1	0.895	0.467	0	0.438
UniRef90_A0A3E5E0H2	0.884	0.868	0.881	0.922	0.688	0.105	0	0.344	0.033
UniRef90_F4XGN6	0.775	0.824	0.667	0.953	1	0.947	0.467	0.094	0.521
UniRef90_D1PHF2	0.645	0.648	0.69	0.812	1	0.895	0	0	0.81
UniRef90_C4ZDL6	0.775	0.802	0.738	0.922	0.625	0.632	0.467	0.125	0.008
UniRef90_B0NRZ1	0.906	0.868	0.881	0.938	0.812	0.158	0	0.5	0.24
UniRef90_C4ZB55	0.833	0.846	0.833	0.953	0.812	0.526	0.267	0.25	0
UniRef90_R6M820	0.935	0.912	0.952	0.969	0.938	0.211	0	0.5	0.661
UniRef90_Q8A477	1	0.989	1	1	1	0.316	0	0.812	0.587
UniRef90_A0A174DZ91	0.862	0.857	0.738	0.984	0.875	1	0	0	0.008
UniRef90_A0A1Y4H9K1	0.341	0.418	0.357	0.766	0.75	0	0	0.938	0.653
UniRef90_A0A2A6ZIF3	0.833	0.879	0.81	1	0.875	0.947	0	0	0
UniRef90_R6MDY5	1	0.989	1	1	1	0.316	0	0.781	0.727
UniRef90_B0NTN7	0.935	0.923	0.929	0.984	0.875	0.211	0.4	0.469	0.694
UniRef90_A0A173X9Q0	1	0.989	1	1	1	0.316	0.133	0.781	0.727
UniRef90_A0A174EL30	0.862	0.835	0.69	0.953	0.812	0.316	0	0.875	0
UniRef90_C4ZBS7	0.71	0.692	0.714	0.938	0.688	0.526	0.333	0.969	0.033
UniRef90_A0A176U4C6	0.413	0.374	0.476	0.984	0.625	0.684	0	0	0.091
UniRef90_Q8A7G0	1	0.989	1	1	1	0.684	0.067	0.812	0.719
UniRef90_B0NSV0	0.942	0.912	0.929	0.984	0.938	0.211	0	0.438	0.521
UniRef90_A0A395UZR7	0.841	0.846	0.81	0.969	0.812	0.684	0	0.094	0
UniRef90_D4KYQ2	0.884	0.89	0.81	1	0.938	1	0.667	0.375	0
UniRef90_C6IGG8	1	0.989	1	1	1	0.316	0.667	0.781	0.76
UniRef90_D4L328	0.812	0.725	0.738	1	0.938	0.474	0	0.031	0.289
UniRef90_A0A0M6WSP8	0.819	0.824	0.762	0.938	0.75	0.474	0.133	0	0
UniRef90_A0A329TVF3	0.841	0.901	0.714	1	0.812	0.947	0	0	0.008
UniRef90_A0A3E4FDK2	0.551	0.505	0.452	0.891	0.938	0.842	0	0	0.025
UniRef90_D4JJS0	0.667	0.538	0.5	0.969	0.812	0.579	0	0	0
UniRef90_F3PRY0	0.899	0.879	0.881	0.953	0.812	0.211	0	0.531	0.107
UniRef90_A0A2A6ZS95	0.848	0.945	0.762	1	0.875	1	0.067	0	0.669
UniRef90_A7V8S4	0.906	0.901	0.857	0.953	0.75	0.158	0	0.406	0.025
UniRef90_A0A1L5KP20	0.63	0.418	0.5	0.656	0.812	0.947	0.067	0.094	0.868
UniRef90_A0A0M6WYS7	0.935	0.901	0.786	1	0.938	1	0.667	0.875	0.43
UniRef90_A0A174UIN9	0.572	0.495	0.476	0.938	0.812	0.158	0.133	0.062	0.19
UniRef90_G1UKB1	0.855	0.868	1	0.906	0.938	0.368	0	0.031	0.033
UniRef90_A7V914	0.855	0.835	0.857	0.906	0.688	0.158	0	0.375	0.033
UniRef90_A7LT91	0.993	0.978	1	0.984	0.938	0.421	0	0.656	0.339
UniRef90_E6SVY1	0.993	0.978	1	1	1	0.263	0	0.75	0.669
UniRef90_D4KAN2	0.906	0.934	0.81	1	0.875	0.947	0	0.375	0.182
UniRef90_A0A174AYK4	0.79	0.758	0.714	0.984	1	0.526	0	0	0.554
UniRef90_A0A139KGR8	0.935	0.912	0.929	0.984	0.938	0.211	0.067	0.531	0.496
UniRef90_R6LH10	0.935	0.912	0.929	0.984	0.938	0.211	0	0.469	0.554
UniRef90_A0A078R3S2	0.935	0.879	0.881	0.891	0.812	0.158	0	0.75	0.008
UniRef90_A7V0D3	0.833	0.824	0.833	0.922	0.75	0	0	0.406	0.033
UniRef90_A0A174UTQ0	0.913	0.846	0.81	0.984	1	0.789	0.067	0.031	0.281
UniRef90_A0A174MIY2	0.833	0.791	0.786	0.906	0.75	0.053	0	0.5	0.058
UniRef90_B8QUG6	0.906	0.89	0.905	1	1	0.947	0.8	1	0.777
UniRef90_R6FPH6	1	0.989	1	1	1	0.211	0	0.75	0.711
UniRef90_F3PFC2	1	0.989	1	1	1	0.316	0.2	0.781	0.719
UniRef90_A0A2U2EG04	0.804	0.791	0.81	0.906	0.688	0.526	0	0	0
UniRef90_A0A174SFG8	0.551	0.571	0.405	0.922	0.625	0.842	0	0	0.033
UniRef90_A0A078S416	0.848	0.824	0.833	0.922	0.625	0	0	0.438	0.05
UniRef90_A0A329TZU2	0.775	0.824	0.762	0.984	0.938	0.895	0.067	0	0
UniRef90_A7V0C4	0.935	0.912	0.929	0.984	0.875	0.211	0	0.5	0.05
UniRef90_F7LNS5	1	0.989	1	1	1	0.263	0	0.781	0.471
UniRef90_A0A3E5ECT0	0.971	0.956	0.952	0.938	0.75	0.211	0	0	0.017
UniRef90_A0A139JXS0	0.891	0.89	0.881	0.953	0.875	0.158	0	0.562	0.612
UniRef90_C4ZEG8	0.775	0.78	0.81	0.906	0.75	0.526	0.133	0	0
UniRef90_C4ZAG0	0.804	0.824	0.762	0.938	0.75	0.579	0	0	0
UniRef90_U2BSA7	0.638	0.725	0.619	1	0.75	0.895	1	0	0
UniRef90_A0A174RP44	1	0.989	1	1	1	0.316	0.133	0.812	0.719
UniRef90_A0A395V4R2	0.761	0.769	0.738	0.984	0.75	0.947	0	0	0
UniRef90_A0A396FE66	0.804	0.835	0.833	0.938	0.812	0.526	0.733	0.844	0
UniRef90_A8SEM1	0.884	0.901	0.714	1	0.875	1	0.067	0	0.669
UniRef90_A0A0K6BTG9	1	0.989	1	1	1	0.316	0.467	0.781	0.595
UniRef90_A0A173ZAE3	0.746	0.758	0.786	0.953	0.75	1	0	0.031	0.008
UniRef90_D4L326	0.739	0.714	0.571	0.953	0.938	0.421	0	0	0.463
UniRef90_A0A1Y4VD92	0.993	0.978	1	1	1	0.316	0.133	0.781	0.446
UniRef90_A0A173U3F7	0.652	0.637	0.452	0.906	0.75	0.842	0.2	0.312	0.149
UniRef90_M2NCH0	0.949	0.945	0.81	1	0.812	0.684	0	0.156	0.174
UniRef90_A0A174CBV4	0.841	0.802	0.667	1	0.875	0.737	0.8	0.031	0.628
UniRef90_C4ZAH1	0.841	0.846	0.81	0.969	0.75	0.737	0.733	0.125	0
UniRef90_A0A139L5E5	1	0.989	1	0.984	1	0.263	0	0.562	0.57
UniRef90_A0A173YUY9	0.971	0.956	0.976	0.984	1	0.947	0	0	0.14
UniRef90_A0A2A6ZLQ4	0.87	0.78	0.762	1	0.875	0.947	0	0	0.14
UniRef90_C4ZAD4	0.812	0.846	0.81	0.969	0.75	0.632	0.267	0.156	0
UniRef90_R5UCF4	0.891	0.89	0.881	0.984	0.875	0.158	0	0.969	0.612
UniRef90_R6M6L8	1	0.989	1	1	1	0.263	0	0.781	0.669
UniRef90_E2ZKQ5	0.891	0.89	0.762	1	0.875	0.895	0	0	0
UniRef90_D1PJV5	0.833	0.901	0.81	1	0.938	0.895	0.6	0	0.041
UniRef90_A0A0E9F9Y5	0.283	0.286	0.286	0.406	0.562	0.947	0	0	0.355
UniRef90_A0A174SFY1	0.848	0.857	0.881	1	0.938	0.421	0	0	0.521
UniRef90_A0A2W5BRV9	0.819	0.835	0.69	0.969	0.75	0.263	0.067	0	0
UniRef90_A0A174SJG2	0.71	0.813	0.619	0.984	0.75	0.947	0	0	0.008
UniRef90_A0A3E2TPS1	0.935	0.967	0.905	1	0.938	0.895	0.133	0	0.033
UniRef90_A0A174AU16	0.87	0.901	0.857	1	0.875	1	0	0	0.686
UniRef90_D4JT23	0.529	0.67	0.452	0.953	0.938	0.579	0	0.562	0.264
UniRef90_K9DX04	0.935	0.912	0.905	0.984	0.812	0.211	0	0.5	0.041
UniRef90_A0A0M6WXI3	0.638	0.67	0.69	0.906	0.688	0.526	0.467	0.125	0.05
UniRef90_A0A076J1Q2	0.964	0.956	1	0.953	0.812	0.105	0	0.844	0.017
UniRef90_A0A174ZLH0	0.616	0.407	0.452	0.922	0.75	0.158	0	0.062	0
UniRef90_A0A395V0S0	0.87	0.879	0.81	0.969	0.812	0.789	0.933	0.469	0
UniRef90_A0A174QRB9	0.754	0.692	0.643	0.984	1	0.895	0	0.156	0.008
UniRef90_D3AGE9	0.79	0.835	0.786	1	1	0.737	0	0	0.413
UniRef90_A0A173TLG7	0.717	0.571	0.524	0.938	0.812	0.789	0	0.062	0
UniRef90_A0A176U4N9	0.514	0.505	0.571	0.938	0.812	0.947	1	0.938	0.372
UniRef90_A0A396FI72	0.812	0.78	0.714	0.906	0.75	0.579	0	0	0
UniRef90_Q8A608	1	0.989	1	1	1	0.211	0.533	0.812	0.678
UniRef90_R5JPG2	0.935	0.912	0.952	0.969	0.938	0.211	0	0.531	0.686
UniRef90_C7H8T9	0.725	0.813	0.643	0.984	0.688	0.632	0	0	0
UniRef90_A0A396FDY5	0.783	0.835	0.81	0.906	0.75	0.579	0	0	0
UniRef90_I3YMY0	0.913	0.868	0.881	0.969	0.938	0.105	0	1	0.554
UniRef90_Q8A639	1	0.989	1	1	1	0.316	0	0.812	0.603
UniRef90_A0A127SJQ1	0.833	0.868	0.81	1	0.938	0.789	0.067	0	0
UniRef90_D4JBI5	0.964	0.857	0.762	1	0.875	0.947	0	0.094	0.066
UniRef90_A8R8V0	0.725	0.648	0.595	1	0.875	0.579	0	0	0.107
UniRef90_I8V0Z4	1	0.989	1	1	0.938	0.211	0	0	0.058
UniRef90_C0CYA8	0.891	0.956	0.905	0.953	0.938	0.421	0	0.094	0.826
[truncated: 65,256 more rows]

## Sheet: Table S5
Table S5: all MetaCyc pathways detected in at least one sample
Function	HMP.phase1	HMP.phase2	HMP.phase3	MetaHit.Healthy	MetaHit.IBD	Traditional	Gorillas	Mice	Chicken
UNINTEGRATED	1	1	1	1	1	1	1	1	1
PWY-7219: adenosine ribonucleotides de novo biosynthesis	1	1	1	1	1	1	1	1	1
PWY-6609: adenine and adenosine salvage III	1	1	1	1	1	1	1	1	1
TRNA-CHARGING-PWY: tRNA charging	1	1	1	1	1	1	1	1	1
PWY-6737: starch degradation V	1	1	1	1	1	1	1	1	0.959
PWY-1042: glycolysis IV	1	1	1	1	1	1	1	1	1
NONMEVIPP-PWY: methylerythritol phosphate pathway I	1	1	1	1	1	1	1	1	0.975
PWY-7221: guanosine ribonucleotides de novo biosynthesis	1	1	1	1	1	1	1	1	1
PWY-6527: stachyose degradation	0.986	1	1	1	1	1	1	1	1
DTDPRHAMSYN-PWY: dTDP-&beta;-L-rhamnose biosynthesis	1	1	1	1	1	1	1	1	1
PWY-6700: queuosine biosynthesis I (de novo)	1	1	1	1	1	1	1	1	1
PWY-5686: UMP biosynthesis I	1	1	1	1	1	1	1	1	1
ILEUSYN-PWY: L-isoleucine biosynthesis I (from threonine)	1	1	1	1	1	1	1	1	0.975
PWY-7111: pyruvate fermentation to isobutanol (engineered)	1	1	1	1	1	1	1	1	0.992
VALSYN-PWY: L-valine biosynthesis	1	1	1	1	1	1	1	1	0.992
COA-PWY-1: superpathway of coenzyme A biosynthesis III (mammals)	1	1	1	1	1	1	1	1	1
PWY-7199: pyrimidine deoxyribonucleosides salvage	1	1	1	1	1	1	1	1	0.992
ANAGLYCOLYSIS-PWY: glycolysis III (from glucose)	1	1	1	1	1	1	1	1	1
PWY-6386: UDP-N-acetylmuramoyl-pentapeptide biosynthesis II (lysine-containing)	1	1	1	1	1	1	1	1	1
PWY-6387: UDP-N-acetylmuramoyl-pentapeptide biosynthesis I (meso-diaminopimelate containing)	1	1	1	1	1	1	1	1	1
PWY-5695: inosine 5'-phosphate degradation	1	1	1	1	1	1	1	1	1
PWY-3841: folate transformations II (plants)	1	1	1	1	1	1	1	1	0.992
PEPTIDOGLYCANSYN-PWY: peptidoglycan biosynthesis I (meso-diaminopimelate containing)	1	1	1	1	1	1	1	1	1
PWY-6151: S-adenosyl-L-methionine salvage I	1	1	1	1	1	1	1	1	1
PWY-6385: peptidoglycan biosynthesis III (mycobacteria)	1	1	1	1	1	1	1	1	1
PWY0-1319: CDP-diacylglycerol biosynthesis II	1	1	1	1	1	1	1	1	1
PWY-5667: CDP-diacylglycerol biosynthesis I	1	1	1	1	1	1	1	1	1
PWY-4242	1	1	1	1	1	1	1	1	1
COA-PWY: coenzyme A biosynthesis I (prokaryotic)	1	1	1	1	1	1	1	1	1
PWY-6163: chorismate biosynthesis from 3-dehydroquinate	1	1	1	1	1	1	1	1	0.975
PWY-5097: L-lysine biosynthesis VI	1	1	1	1	1	1	1	1	1
1CMET2-PWY: folate transformations III (E. coli)	1	1	1	1	1	1	1	1	0.992
BRANCHED-CHAIN-AA-SYN-PWY: superpathway of branched chain amino acid biosynthesis	1	1	1	1	1	1	1	1	0.975
ARO-PWY: chorismate biosynthesis I	1	1	1	1	1	1	1	1	0.967
HISTSYN-PWY: L-histidine biosynthesis	1	1	1	1	1	1	1	1	0.975
COMPLETE-ARO-PWY: superpathway of aromatic amino acid biosynthesis	1	1	1	1	1	1	1	1	0.967
PWY-6122: 5-aminoimidazole ribonucleotide biosynthesis II	1	1	1	1	1	1	1	1	1
PWY-6277: superpathway of 5-aminoimidazole ribonucleotide biosynthesis	1	1	1	1	1	1	1	1	1
PWY-6121: 5-aminoimidazole ribonucleotide biosynthesis I	1	1	1	1	1	1	1	1	1
PWY-7400: L-arginine biosynthesis IV (archaebacteria)	1	1	1	1	1	1	1	1	0.967
ARGSYN-PWY: L-arginine biosynthesis I (via L-ornithine)	1	1	1	1	1	1	1	1	0.975
PWY-5103: L-isoleucine biosynthesis III	1	1	1	1	1	1	1	1	0.975
CALVIN-PWY: Calvin-Benson-Bassham cycle	1	1	1	1	1	1	1	1	1
PANTOSYN-PWY: superpathway of coenzyme A biosynthesis I (bacteria)	1	1	1	1	1	1	1	1	0.959
ARGSYNBSUB-PWY: L-arginine biosynthesis II (acetyl cycle)	0.993	1	1	1	1	1	1	1	0.967
FASYN-INITIAL-PWY: superpathway of fatty acid biosynthesis initiation (E. coli)	1	1	1	1	1	1	1	1	1
PWY-6317: D-galactose degradation I (Leloir pathway)	1	1	1	1	1	1	0.933	1	1
PWY66-422	0.986	0.989	1	1	1	1	0.933	1	0.992
PWY0-1586: peptidoglycan maturation (meso-diaminopimelate containing)	1	1	1	1	1	1	0.733	0.816	1
PWY-724: superpathway of L-lysine, L-threonine and L-methionine biosynthesis II	1	1	1	1	1	1	1	1	0.992
PYRIDNUCSYN-PWY: NAD de novo biosynthesis I (from aspartate)	1	1	1	1	1	1	1	1	0.959
PWY-2942: L-lysine biosynthesis III	1	1	1	1	1	1	1	1	1
PANTO-PWY: phosphopantothenate biosynthesis I	1	1	1	1	1	1	1	1	0.967
RIBOSYN2-PWY: flavin biosynthesis I (bacteria and plants)	1	1	1	1	1	1	0.933	1	0.992
PWY-3001: superpathway of L-isoleucine biosynthesis I	1	1	1	1	1	1	1	0.993	0.992
PWY0-1296: purine ribonucleosides degradation	0.993	1	1	1	1	1	1	1	0.992
PWY-5973: cis-vaccenate biosynthesis	1	1	1	1	1	1	1	1	0.992
PWY-6123: inosine-5'-phosphate biosynthesis I	1	1	1	1	1	1	1	1	1
GLUTORN-PWY: L-ornithine biosynthesis I	1	1	1	1	1	1	1	1	0.975
PWY-6124: inosine-5'-phosphate biosynthesis II	1	1	1	1	1	1	1	1	1
THRESYN-PWY: superpathway of L-threonine biosynthesis	1	1	1	1	1	1	1	0.993	0.992
PWY-6168: flavin biosynthesis III (fungi)	1	1	1	1	1	1	1	0.957	0.983
PWY-7663: gondoate biosynthesis (anaerobic)	1	1	1	1	1	1	1	1	0.992
PWY-5154: L-arginine biosynthesis III (via N-acetyl-L-citrulline)	1	1	1	1	1	1	1	0.922	0.959
HSERMETANA-PWY: L-methionine biosynthesis III	1	1	1	1	1	1	1	1	0.992
PWY-7229: superpathway of adenosine nucleotides de novo biosynthesis I	1	1	1	1	1	1	1	0.879	0.983
PWY-7357: thiamine phosphate formation from pyrithiamine and oxythiamine (yeast)	1	1	1	1	1	1	0.933	0.95	0.983
PWY-6897: thiamine diphosphate salvage II	1	1	1	1	1	1	0.933	0.95	0.983
OANTIGEN-PWY: O-antigen building blocks biosynthesis (E. coli)	1	0.989	1	1	1	1	1	0.993	0.992
ARGININE-SYN4-PWY: L-ornithine biosynthesis II	1	0.989	1	1	1	0.579	0.733	0.582	0.826
TRPSYN-PWY: L-tryptophan biosynthesis	1	1	1	1	1	1	1	0.993	0.95
PWY-6305: superpathway of putrescine biosynthesis	0.993	0.978	1	1	1	1	0.8	0.404	0.926
PWY-6703: preQ0 biosynthesis	1	1	1	1	1	1	1	1	0.959
PWY-5100: pyruvate fermentation to acetate and lactate II	0.993	1	1	1	1	1	1	1	1
ANAEROFRUCAT-PWY: homolactic fermentation	0.993	1	1	1	1	1	1	0.979	1
PWY-841: superpathway of purine nucleotides de novo biosynthesis I	1	1	1	1	1	1	1	0.879	0.983
GLYCOGENSYNTH-PWY: glycogen biosynthesis I (from ADP-D-Glucose)	1	1	1	1	1	1	1	1	0.992
THISYNARA-PWY: superpathway of thiamine diphosphate biosynthesis III (eukaryotes)	1	1	1	1	1	1	0.6	0.943	0.942
SER-GLYSYN-PWY: superpathway of L-serine and glycine biosynthesis I	1	1	1	1	1	1	1	1	0.992
PWY-6270: isoprene biosynthesis I	1	1	1	1	1	1	1	0.823	0.967
PWY-7282: 4-amino-2-methyl-5-diphosphomethylpyrimidine biosynthesis II	1	1	1	1	0.938	0.895	0.067	0.738	0.884
PWY-7560: methylerythritol phosphate pathway II	1	1	1	1	1	1	1	0.865	0.967
CITRULBIO-PWY: L-citrulline biosynthesis	1	1	1	1	1	0.684	0.8	0.681	0.322
PWY-6126: superpathway of adenosine nucleotides de novo biosynthesis II	1	1	1	1	1	1	1	0.879	0.983
PWY0-162: superpathway of pyrimidine ribonucleotides de novo biosynthesis	1	1	1	1	1	1	1	0.688	0.959
UDPNAGSYN-PWY: UDP-N-acetyl-D-glucosamine biosynthesis I	1	0.989	1	1	1	1	1	0.993	1
COBALSYN-PWY: superpathway of adenosylcobalamin salvage from cobinamide I	0.978	0.978	0.976	1	1	1	0.867	0.447	0.983
PWY-4984: urea cycle	1	1	1	1	1	0.684	0.8	0.681	0.322
NONOXIPENT-PWY: pentose phosphate pathway (non-oxidative branch) I	1	1	1	1	1	1	1	1	1
GLUCONEO-PWY: gluconeogenesis I	0.993	1	0.976	1	1	1	1	1	0.992
PWY-2941: L-lysine biosynthesis II	0.986	1	1	1	1	1	0.933	0.922	0.992
PWY-7228: superpathway of guanosine nucleotides de novo biosynthesis I	1	1	1	1	1	1	1	0.879	0.983
PHOSLIPSYN-PWY: superpathway of phospholipid biosynthesis I (bacteria)	0.986	1	1	1	1	1	0.667	0.56	0.934
RHAMCAT-PWY: L-rhamnose degradation I	1	1	1	1	1	1	1	1	0.959
COLANSYN-PWY: colanic acid building blocks biosynthesis	0.993	0.989	1	1	0.938	1	0.8	0.929	0.868
ASPASN-PWY: superpathway of L-aspartate and L-asparagine biosynthesis	1	1	1	1	1	1	1	1	0.992
PWY0-1261: anhydromuropeptides recycling I	1	0.967	0.952	1	1	1	0.467	0.553	0.893
PWY0-845: superpathway of pyridoxal 5'-phosphate biosynthesis and salvage	1	1	1	1	0.938	0.895	0.067	0.766	0.752
PWY-5188: tetrapyrrole biosynthesis I (from glutamate)	1	0.978	0.976	1	1	1	0.933	0.986	0.992
PWY-6125: superpathway of guanosine nucleotides de novo biosynthesis II	1	1	1	1	1	1	1	0.879	0.983
PWY-7237: myo-, chiro- and scyllo-inositol degradation	0.993	0.989	0.976	1	1	1	1	1	0.983
PWY-5659: GDP-mannose biosynthesis	1	1	1	1	1	1	0.867	1	0.983
GLYCOLYSIS: glycolysis I (from glucose 6-phosphate)	1	1	1	1	1	1	1	0.986	1
PWY-5484: glycolysis II (from fructose 6-phosphate)	1	1	1	1	1	1	1	0.986	1
PWY-7539: 6-hydroxymethyl-dihydropterin diphosphate biosynthesis III (Chlamydia)	1	1	1	1	1	1	0.267	0.624	0.992
PWY-5121: superpathway of geranylgeranyl diphosphate biosynthesis II (via MEP)	0.993	1	1	0.969	1	0.895	1	0.624	0.909
PWY-7323: superpathway of GDP-mannose-derived O-antigen building blocks biosynthesis	1	1	1	1	0.938	1	0.8	0.929	0.876
PWY-6147: 6-hydroxymethyl-dihydropterin diphosphate biosynthesis I	1	1	1	1	1	1	0.267	0.624	1
PWY-7208: superpathway of pyrimidine nucleobases salvage	1	1	1	1	1	1	1	0.929	0.983
PYRIDOXSYN-PWY: pyridoxal 5'-phosphate biosynthesis I	1	1	1	1	0.938	0.895	0.067	0.773	0.793
HISDEG-PWY: L-histidine degradation I	1	1	1	1	1	1	1	1	0.868
PWY-7456: &beta;-(1,4)-mannan degradation	1	1	1	1	1	1	0.6	0.574	0.826
PWY-6901: superpathway of glucose and xylose degradation	0.993	1	0.976	1	1	0.737	0.2	0.936	0.926
PWY4FS-7: phosphatidylglycerol biosynthesis I (plastidic)	0.986	1	1	1	1	1	0.733	0.695	0.992
PWY4FS-8: phosphatidylglycerol biosynthesis II (non-plastidic)	0.986	1	1	1	1	1	0.733	0.695	0.992
PWY-5030: L-histidine degradation III	1	1	1	0.984	1	0.368	0.867	0.702	0.521
PENTOSE-P-PWY: pentose phosphate pathway	1	1	1	1	1	0.737	0.267	0.936	0.95
PWY-7220: adenosine deoxyribonucleotides de novo biosynthesis II	1	1	1	1	1	1	1	0.879	0.983
PWY-7222: guanosine deoxyribonucleotides de novo biosynthesis II	1	1	1	1	1	1	1	0.879	0.983
PWY-7392: taxadiene biosynthesis (engineered)	0.978	0.967	1	0.953	0.938	0.526	0.067	0.539	0.719
PWY3O-355: stearate biosynthesis III (fungi)	0.971	0.956	1	0.969	0.875	0.158	0	0.447	0.702
PWY-7234: inosine-5'-phosphate biosynthesis III	0.957	0.978	0.976	1	1	0.947	0.733	0.78	1
PWY-7197: pyrimidine deoxyribonucleotide phosphorylation	1	1	1	1	1	1	1	0.879	0.983
PWY66-399: gluconeogenesis III	0.899	0.901	0.833	0.984	1	0.947	1	0.723	0.835
PWY-5104: L-isoleucine biosynthesis IV	1	0.989	1	1	1	1	1	0.745	0.934
PWY-6936: seleno-amino acid biosynthesis (plants)	0.986	1	0.976	1	1	1	0.933	0.667	0.975
GLYCOLYSIS-E-D: superpathway of glycolysis and the Entner-Doudoroff pathway	0.993	1	0.976	1	1	0.842	0.267	0.66	0.917
NAGLIPASYN-PWY: lipid IVA biosynthesis (E. coli)	1	1	0.976	0.984	0.938	1	0.4	0.638	0.95
PWY-7383: anaerobic energy metabolism (invertebrates, cytosol)	0.899	0.901	0.857	0.984	1	0.947	1	0.83	0.835
PYRIDNUCSAL-PWY: NAD salvage pathway I (PNC VI cycle)	0.203	0.242	0.262	0.531	0.625	0.737	0.2	0.099	0.719
PWY-1269: CMP-3-deoxy-D-manno-octulosonate biosynthesis	1	1	1	1	1	1	0.933	0.702	0.95
DAPLYSINESYN-PWY: L-lysine biosynthesis I	0.804	0.824	0.857	0.953	0.938	1	0.533	0.411	0.942
THISYN-PWY: superpathway of thiamine diphosphate biosynthesis I	0.457	0.626	0.571	0.922	0.812	1	0.267	0.156	0.818
PWY-6471: peptidoglycan biosynthesis IV (Enterococcus faecium)	0.58	0.67	0.619	0.891	0.875	0.895	0.333	0.085	0.719
GLUCUROCAT-PWY: superpathway of &beta;-D-glucuronosides degradation	0.993	1	0.976	1	1	1	0.933	0.872	0.86
PWY-4041: &gamma;-glutamyl cycle	0.899	0.934	0.881	1	1	1	0.667	0.865	0.942
GALACT-GLUCUROCAT-PWY: superpathway of hexuronide and hexuronate degradation	0.971	0.989	0.952	1	1	1	0.4	0.773	0.818
BIOTIN-BIOSYNTHESIS-PWY: biotin biosynthesis I	0.978	0.967	0.976	0.969	0.938	0.947	0.133	0.411	0.876
PWY-5345: superpathway of L-methionine biosynthesis (by sulfhydrylation)	0.464	0.571	0.524	0.625	0.688	1	0.6	0.206	0.744
P108-PWY: pyruvate fermentation to propanoate I	0.92	0.89	0.929	1	1	1	1	0.78	0.777
PWY-6470: peptidoglycan biosynthesis V (&beta;-lactam resistance)	0.551	0.648	0.595	0.891	0.875	0.895	0	0.021	0.248
POLYISOPRENSYN-PWY: polyisoprenoid biosynthesis (E. coli)	0.986	0.989	1	1	1	0.684	0.067	0.56	0.893
PWY-7115: C4 photosynthetic carbon assimilation cycle, NAD-ME type	0.616	0.604	0.571	0.906	0.875	1	0.467	0.213	0.793
HEXITOLDEGSUPER-PWY: superpathway of hexitol degradation (bacteria)	0.739	0.725	0.786	0.953	0.875	0.947	0.8	0.936	0.975
PWY0-781: aspartate superpathway	0.275	0.374	0.286	0.812	0.938	0.947	0.533	0.128	0.752
TEICHOICACID-PWY: poly(glycerol phosphate) wall teichoic acid biosynthesis	0.993	1	0.976	1	0.938	1	0.6	0.461	0.826
P4-PWY: superpathway of L-lysine, L-threonine and L-methionine biosynthesis I	0.297	0.385	0.31	0.812	0.938	0.947	0.533	0.128	0.752
PWY-6519: 8-amino-7-oxononanoate biosynthesis I	0.978	0.967	0.976	0.969	0.938	0.947	0.133	0.411	0.876
PWY-7117: C4 photosynthetic carbon assimilation cycle, PEPCK type	0.428	0.516	0.452	0.703	0.875	0.895	0.667	0.532	0.967
PWY-7242: D-fructuronate degradation	0.993	1	0.976	1	1	1	0.933	0.879	0.917
SULFATE-CYS-PWY: superpathway of sulfate assimilation and cysteine biosynthesis	0.464	0.571	0.548	0.625	0.688	1	0.6	0.262	0.736
GALACTUROCAT-PWY: D-galacturonate degradation I	0.978	0.989	0.952	1	1	1	0.867	0.894	0.901
TCA: TCA cycle I (prokaryotic)	0.862	0.857	0.905	1	1	1	1	0.652	0.893
PWY-7198: pyrimidine deoxyribonucleotides de novo biosynthesis IV	0.891	0.967	0.929	0.953	0.938	0.947	1	0.738	0.975
FASYN-ELONG-PWY: fatty acid elongation -- saturated	0.978	0.967	0.976	0.969	0.938	0.947	1	0.411	0.901
PWY-241: C4 photosynthetic carbon assimilation cycle, NADP-ME type	0.428	0.516	0.452	0.703	0.875	0.895	0.667	0.61	0.934
P124-PWY: Bifidobacterium shunt	0.181	0.33	0.286	0.484	0.5	0.947	0.533	0.404	0.529
PWY-5347: superpathway of L-methionine biosynthesis (transsulfuration)	0.841	0.846	0.881	0.984	0.938	1	0.933	0.589	0.942
METH-ACETATE-PWY: methanogenesis from acetate	0.594	0.56	0.619	1	1	1	0.8	0.752	0.719
MET-SAM-PWY: superpathway of S-adenosyl-L-methionine biosynthesis	0.841	0.846	0.881	0.984	0.938	1	0.933	0.681	0.942
FERMENTATION-PWY: mixed acid fermentation	0.413	0.484	0.452	0.719	0.875	1	0.867	0.631	0.95
PWY-6859: all-trans-farnesol biosynthesis	0.978	0.967	1	0.953	1	0.684	0.067	0.539	0.843
PWY-5505: L-glutamate and L-glutamine biosynthesis	0.913	0.923	0.905	1	1	1	0.933	0.66	0.835
PWY-7388: octanoyl-[acyl-carrier protein] biosynthesis (mitochondria, yeast)	0.978	0.967	0.976	0.969	0.938	0.947	1	0.411	0.917
PWY-7664: oleate biosynthesis IV (anaerobic)	0.978	0.967	0.976	0.969	0.938	0.947	1	0.411	0.901
PWY-6507: 4-deoxy-L-threo-hex-4-enopyranuronate degradation	0.993	0.989	0.976	1	1	1	0.933	0.929	0.926
PWY-5913: partial TCA cycle (obligate autotrophs)	0.442	0.527	0.452	0.719	0.875	1	1	0.66	0.967
METSYN-PWY: superpathway of L-homoserine and L-methionine biosynthesis	0.841	0.846	0.881	0.984	0.938	1	0.933	0.681	0.942
PWY-6969: TCA cycle V (2-oxoglutarate synthase)	0.797	0.758	0.786	0.969	0.938	1	1	0.426	0.843
GLCMANNANAUT-PWY: superpathway of N-acetylglucosamine, N-acetylmannosamine and N-acetylneuraminate degradation	0.971	0.989	0.976	1	1	1	0.6	0.901	0.983
PWY-4981: L-proline biosynthesis II (from arginine)	0.899	0.945	0.905	1	1	1	1	1	1
PWY66-409: superpathway of purine nucleotide salvage	0.42	0.473	0.333	0.906	0.75	1	0	0.277	0.777
ARG+POLYAMINE-SYN: superpathway of arginine and polyamine biosynthesis	0.783	0.813	0.786	0.969	0.938	1	0.733	0.149	0.917
PWY0-862: (5Z)-dodecenoate biosynthesis I	0.978	0.967	0.976	0.984	0.938	1	1	0.418	0.901
PWY-6282: palmitoleate biosynthesis I (from (5Z)-dodec-5-enoate)	0.978	0.967	0.976	0.969	0.938	0.947	1	0.411	0.901
PWY-5989: stearate biosynthesis II (bacteria and plants)	0.986	0.967	0.976	1	0.938	1	0.867	0.418	0.901
PWY-6353: purine nucleotides degradation II (aerobic)	0.877	0.868	0.881	0.984	0.938	1	0.6	0.617	0.909
FUC-RHAMCAT-PWY: superpathway of fucose and rhamnose degradation	0.891	0.901	0.976	0.953	0.938	0.842	0.133	0.277	0.678
PWY-6549: L-glutamine biosynthesis III	0.464	0.56	0.429	0.938	1	0.947	0.867	0.603	0.769
P441-PWY: superpathway of N-acetylneuraminate degradation	0.464	0.56	0.571	0.938	0.938	1	0.533	0.333	0.926
PWY-5384: sucrose degradation IV (sucrose phosphorylase)	0.594	0.714	0.643	0.906	1	0.947	0.267	0.397	0.876
PWY-6590: superpathway of Clostridium acetobutylicum acidogenic fermentation	0.732	0.846	0.762	1	0.938	0.947	0.533	0.858	0.81
PWY-6608: guanosine nucleotides degradation III	1	1	1	1	1	1	0.867	0.957	0.983
PWY-5690: TCA cycle II (plants and fungi)	0.862	0.868	0.905	1	1	1	1	0.617	0.818
P42-PWY: incomplete reductive TCA cycle	0.775	0.879	0.81	0.969	0.938	1	1	0.44	0.926
PWY-6863: pyruvate fermentation to hexanol (engineered)	0.609	0.582	0.619	1	0.875	0.947	1	0.064	0.719
SO4ASSIM-PWY: assimilatory sulfate reduction I	0.464	0.571	0.548	0.625	0.688	1	0.6	0.27	0.752
PWY-6143: CMP-pseudaminate biosynthesis	0.399	0.33	0.333	0.391	0.5	0.053	0	0.894	0.215
SALVADEHYPOX-PWY: adenosine nucleotides degradation II	0.877	0.868	0.881	1	0.938	1	0.733	0.936	0.909
CENTFERM-PWY: pyruvate fermentation to butanoate	0.732	0.846	0.762	1	0.938	0.947	0.533	0.858	0.81
PWY-622: starch biosynthesis	0.065	0.055	0.119	0.281	0.312	0.105	0	0.014	0.397
PWY0-1241: ADP-L-glycero-&beta;-D-manno-heptose biosynthesis	0.957	0.945	0.976	1	1	1	0.867	0.61	0.901
GLYCOCAT-PWY: glycogen degradation I	0.348	0.473	0.452	0.641	0.688	0.684	0	0.099	0.562
HOMOSER-METSYN-PWY: L-methionine biosynthesis I	0.841	0.846	0.881	0.984	0.938	1	0.933	0.681	0.942
P164-PWY: purine nucleobases degradation I (anaerobic)	0.558	0.593	0.714	0.969	1	0.947	0.267	0.908	0.785
POLYAMINSYN3-PWY: superpathway of polyamine biosynthesis II	0.413	0.505	0.357	0.594	0.688	0.947	0.667	0.085	0.686
POLYAMSYN-PWY: superpathway of polyamine biosynthesis I	0.804	0.813	0.786	0.969	0.938	1	0.867	0.149	0.926
PWY-6892: thiazole component of thiamine diphosphate biosynthesis I	0.457	0.626	0.571	0.922	0.812	1	0.267	0.156	0.818
PWY-6606: guanosine nucleotides degradation II	0.949	0.956	0.952	0.984	0.875	1	0.6	0.78	0.983
PWY-7332: superpathway of UDP-N-acetylglucosamine-derived O-antigen building blocks biosynthesis	0.768	0.714	0.643	0.656	0.562	0.158	0.467	0.475	0.587
NAD-BIOSYNTHESIS-II: NAD salvage pathway III (to nicotinamide riboside)	0.87	0.89	0.952	0.875	0.875	0.895	0.8	0.348	0.843
PWY-5838: superpathway of menaquinol-8 biosynthesis I	0.464	0.538	0.5	0.5	0.312	0.684	0	0.106	0.57
FUCCAT-PWY: fucose degradation	0.906	0.934	0.976	0.984	0.938	0.947	0.533	0.44	0.711
PWY-5022: 4-aminobutanoate degradation V	0.471	0.615	0.762	0.875	0.75	0.684	0.8	0.305	0.636
GLUDEG-I-PWY: GABA shunt	0.522	0.648	0.69	0.859	0.875	0.737	0.067	0.369	0.777
PWY-5845: superpathway of menaquinol-9 biosynthesis	0.362	0.418	0.381	0.375	0.312	0.632	0	0.043	0.355
PWY-5897: superpathway of menaquinol-11 biosynthesis	0.464	0.538	0.5	0.5	0.312	0.737	0.067	0.121	0.579
PWY-5898: superpathway of menaquinol-12 biosynthesis	0.464	0.538	0.5	0.5	0.312	0.737	0.067	0.121	0.579
PWY-5899: superpathway of menaquinol-13 biosynthesis	0.464	0.538	0.5	0.5	0.312	0.737	0.067	0.121	0.579
PWY0-1297: superpathway of purine deoxyribonucleosides degradation	0.507	0.593	0.5	0.953	0.938	1	0.8	0.617	0.926
PWY-7328: superpathway of UDP-glucose-derived O-antigen building blocks biosynthesis	0.522	0.659	0.548	0.766	0.688	0.895	0.733	0.099	0.545
PWY-6731: starch degradation III	0.348	0.473	0.452	0.641	0.688	0.684	0	0.092	0.537
PPGPPMET-PWY: ppGpp metabolism	0.471	0.615	0.571	0.922	0.938	0.947	0.867	0.645	0.917
PWY-7312: dTDP-&beta;-D-fucofuranose biosynthesis	0.551	0.538	0.476	0.344	0.375	0.105	0	0	0.008
PWY-5676: acetyl-CoA fermentation to butanoate II	0.79	0.868	0.881	0.984	0.812	1	0.6	0.461	0.868
PWY-6531: mannitol cycle	0.754	0.725	0.881	0.734	0.562	0.684	0	0.199	0.62
LACTOSECAT-PWY: lactose and galactose degradation I	0.529	0.571	0.452	0.859	1	1	0.733	0.837	0.686
P461-PWY: hexitol fermentation to lactate, formate, ethanol and acetate	0.37	0.56	0.5	0.875	0.875	0.895	0.933	0.908	0.95
PWY-5861: superpathway of demethylmenaquinol-8 biosynthesis I	0.464	0.538	0.5	0.5	0.312	0.684	0	0.106	0.57
PWY-2723: trehalose degradation V	0.348	0.473	0.452	0.641	0.688	0.684	0	0.099	0.562
PWY-5840: superpathway of menaquinol-7 biosynthesis	0.362	0.44	0.381	0.469	0.312	0.737	0	0.071	0.579
GLUCOSE1PMETAB-PWY: glucose and glucose-1-phosphate degradation	0.435	0.582	0.524	0.656	0.688	0.789	0	0.135	0.694
PWY-7316: dTDP-N-acetylviosamine biosynthesis	0.529	0.44	0.381	0.438	0.188	0.158	0	0.227	0.058
PWY-6595: superpathway of guanosine nucleotides degradation (plants)	0.645	0.659	0.738	0.734	0.688	0.737	0	0.553	0.653
PWY-5862: superpathway of demethylmenaquinol-9 biosynthesis	0.362	0.418	0.381	0.375	0.312	0.632	0	0.043	0.355
PWY-5005: biotin biosynthesis II	0.775	0.824	0.81	0.844	0.75	0.684	0	0.688	0.694
PWY-7013: (S)-propane-1,2-diol degradation	0.217	0.341	0.214	0.688	0.75	0.737	0.733	0.121	0.868
PWY-7209: superpathway of pyrimidine ribonucleosides degradation	0.058	0.121	0.214	0.453	0.5	0.263	0	0.035	0.355
PWY0-1479: tRNA processing	0.891	0.846	0.81	0.984	0.875	1	0.067	0.411	0.893
ARGORNPROST-PWY	0.442	0.549	0.452	0.859	0.438	0.895	0.8	0.078	0.355
PWY4LZ-257: superpathway of fermentation (Chlamydomonas reinhardtii)	0.203	0.33	0.333	0.703	0.875	0.947	0.467	0.532	0.843
P185-PWY: formaldehyde assimilation III (dihydroxyacetone cycle)	0.667	0.648	0.619	0.953	0.812	0.789	0.467	0.284	0.157
PWY-5837: 2-carboxy-1,4-naphthoquinol biosynthesis	0.464	0.538	0.5	0.5	0.312	0.737	0.067	0.121	0.579
GOLPDLCAT-PWY: superpathway of glycerol degradation to 1,3-propanediol	0.507	0.462	0.595	0.828	0.875	1	0.6	0.312	0.736
P161-PWY: acetylene degradation (anaerobic)	0.217	0.341	0.333	0.703	0.875	0.947	0.867	0.532	0.917
PWY490-3: nitrate reduction VI (assimilatory)	0.051	0.077	0	0.344	0.188	0.158	0	0	0.066
HEMESYN2-PWY: heme b biosynthesis II (oxygen-independent)	0.812	0.78	0.833	0.844	0.875	0.789	0.067	0.56	0.942
P621-PWY: nylon-6 oligomer degradation	0	0	0	0.125	0.125	0.053	0	0.028	0.05
HEME-BIOSYNTHESIS-II: heme b biosynthesis I (aerobic)	0.746	0.703	0.571	0.797	0.5	0.737	0.133	0.44	0.785
PWY0-1298: superpathway of pyrimidine deoxyribonucleosides degradation	0.551	0.626	0.571	0.938	0.875	1	1	0.589	0.95
PWY-6263: superpathway of menaquinol-8 biosynthesis II	0.457	0.538	0.571	0.719	0.625	0.105	0	0.319	0.736
PWY-5265: peptidoglycan biosynthesis II (staphylococci)	0.022	0.033	0.048	0.141	0.188	0.211	0.133	0.028	0.306
PWY-1861: formaldehyde assimilation II (assimilatory RuMP Cycle)	0.304	0.429	0.262	0.75	0.75	0.737	0.733	0.248	0.777
FOLSYN-PWY: superpathway of tetrahydrofolate biosynthesis and salvage	0.239	0.319	0.286	0.516	0.5	0.842	0.067	0.092	0.488
PWY-7315: dTDP-N-acetylthomosamine biosynthesis	0.58	0.626	0.595	0.828	0.562	0.947	0.733	0.993	0.595
PWY-5189: tetrapyrrole biosynthesis II (from glycine)	0.246	0.253	0.19	0.312	0.438	0.842	0.533	0.546	0.884
PWY-6612: superpathway of tetrahydrofolate biosynthesis	0.239	0.319	0.286	0.516	0.5	0.842	0.067	0.092	0.488
PWY-6572: chondroitin sulfate degradation I (bacterial)	0.739	0.824	0.762	0.578	0.438	0.053	0	0.142	0
GALACTARDEG-PWY: D-galactarate degradation I	0.529	0.604	0.643	0.672	0.688	0.842	0.067	0.156	0.694
GLUCARGALACTSUPER-PWY: superpathway of D-glucarate and D-galactarate degradation	0.529	0.604	0.643	0.672	0.688	0.842	0.067	0.156	0.694
PWY-6749: CMP-legionaminate biosynthesis I	0.493	0.462	0.571	0.375	0.312	0.105	0	0.674	0.545
GLUCARDEG-PWY: D-glucarate degradation I	0.341	0.297	0.31	0.609	0.438	0.789	0.067	0.121	0.661
PWY66-389: phytol degradation	0.196	0.363	0.262	0.312	0.5	1	0.4	0.106	0.901
PWY-7210: pyrimidine deoxyribonucleotides biosynthesis from CTP	0.63	0.758	0.667	0.484	0.688	0.684	1	0.106	0.893
PWY-7184: pyrimidine deoxyribonucleotides de novo biosynthesis I	0.696	0.813	0.786	0.547	0.688	0.789	1	0.461	0.901
PWY-6545: pyrimidine deoxyribonucleotides de novo biosynthesis III	0.688	0.813	0.786	0.547	0.688	0.789	1	0.461	0.901
PWY-5723: Rubisco shunt	0.145	0.209	0.19	0.266	0.25	0.789	0.8	0.142	0.81
PWY-7211: superpathway of pyrimidine deoxyribonucleotides de novo biosynthesis	0.457	0.626	0.5	0.516	0.688	0.737	0.533	0.078	0.835
PWY-5101: L-isoleucine biosynthesis II	0.058	0.055	0.071	0.203	0.125	0.579	0.8	0.007	0.388
PWY-7200: superpathway of pyrimidine deoxyribonucleoside salvage	0.051	0.11	0.095	0.062	0	0.053	0.133	0.05	0.215
PWY-6803: phosphatidylcholine acyl editing	0.225	0.33	0.286	0.266	0.312	0.842	0.067	0.156	0.769
PWY-6785: hydrogen production VIII	0	0	0	0.031	0.062	0	0.533	0	0.182
PWY-101: photosynthesis light reactions	0	0	0	0.031	0.062	0	0.8	0.021	0.19
PWY-5083: NAD(P)/NADPH interconversion	0.123	0.187	0.095	0.328	0.25	0.789	0.2	0.092	0.645
GLYCOLYSIS-TCA-GLYOX-BYPASS: superpathway of glycolysis, pyruvate dehydrogenase, TCA, and glyoxylate bypass	0.145	0.187	0.167	0.203	0.25	0.895	0.067	0.092	0.645
P105-PWY: TCA cycle IV (2-oxoglutarate decarboxylase)	0.123	0.154	0.143	0.172	0.25	0.789	0.067	0.064	0.587
TCA-GLYOX-BYPASS: superpathway of glyoxylate bypass and TCA	0.145	0.187	0.167	0.203	0.25	0.895	0.067	0.092	0.645
PWY0-1415: superpathway of heme b biosynthesis from uroporphyrinogen-III	0.188	0.297	0.238	0.234	0.312	0.684	0.067	0.057	0.554
PWY-7218: photosynthetic 3-hydroxybutanoate biosynthesis (engineered)	0	0	0	0.016	0	0	0.533	0	0.132
METHGLYUT-PWY: superpathway of methylglyoxal degradation	0.645	0.615	0.667	0.578	0.625	0.632	0	0.064	0.694
GLYOXYLATE-BYPASS: glyoxylate cycle	0.188	0.286	0.167	0.266	0.312	0.947	0.333	0.135	0.686
PWY-4702: phytate degradation I	0.123	0.143	0.119	0.172	0.188	0.632	0	0.028	0.463
PHOTOALL-PWY: oxygenic photosynthesis	0	0	0	0.016	0	0	0.533	0	0.14
PWY-5971: palmitate biosynthesis (type II fatty acid synthase)	0.297	0.253	0.19	0.391	0.188	0.947	0	0.05	0.463
PWY-5497: purine nucleobases degradation II (anaerobic)	0.312	0.451	0.381	0.531	0.625	0.789	0.133	0.234	0.702
PWY-7003: glycerol degradation to butanol	0.13	0.154	0.095	0.391	0.438	0.474	0.4	0.021	0.124
PWY-6285: superpathway of fatty acids biosynthesis (E. coli)	0.051	0.088	0.071	0.094	0.125	0.947	0	0.035	0.397
RUMP-PWY: formaldehyde oxidation I	0.029	0.033	0.024	0.234	0.5	0.474	0.067	0.035	0.612
PWY0-881: superpathway of fatty acid biosynthesis I (E. coli)	0.007	0.055	0	0.016	0.062	0	0	0	0.025
PWY-5464: superpathway of cytosolic glycolysis (plants), pyruvate dehydrogenase and TCA cycle	0.072	0.099	0.119	0.281	0.25	0.684	0	0.035	0.421
PWY-5918: superpathway of heme b biosynthesis from glutamate	0.232	0.253	0.286	0.328	0.312	0.737	0.067	0.39	0.744
PWY-7196: superpathway of pyrimidine ribonucleosides salvage	0.029	0.022	0.048	0.141	0.25	0	0.2	0	0.207
PWY-5850: superpathway of menaquinol-6 biosynthesis	0.065	0.176	0.048	0.172	0.188	0.579	0	0.028	0.331
PWY-5896: superpathway of menaquinol-10 biosynthesis	0.065	0.187	0.048	0.172	0.188	0.579	0	0.028	0.388
PWY-5173	0.21	0.297	0.238	0.281	0.312	0.842	0.067	0.113	0.62
PRPP-PWY: superpathway of histidine, purine, and pyrimidine biosynthesis	0.08	0.11	0.048	0.125	0.125	0.526	0	0.028	0.198
DENOVOPURINE2-PWY: superpathway of purine nucleotides de novo biosynthesis II	0.094	0.132	0.048	0.141	0.125	0.526	0	0.035	0.198
PWY-7389: superpathway of anaerobic energy metabolism (invertebrates)	0.101	0.165	0.119	0.156	0.125	0.842	0.133	0.021	0.57
PWY-6588: pyruvate fermentation to acetone	0.297	0.429	0.405	0.516	0.562	0.579	0.533	0.135	0.893
PWY-6284: superpathway of unsaturated fatty acids biosynthesis (E. coli)	0.297	0.253	0.19	0.375	0.188	0.947	0	0.05	0.463
PWY66-398: TCA cycle III (animals)	0.072	0.121	0.143	0.266	0.188	0.579	0	0.021	0.14
PWY-5860: superpathway of demethylmenaquinol-6 biosynthesis I	0.065	0.176	0.048	0.172	0.188	0.579	0	0.028	0.331
P23-PWY: reductive TCA cycle I	0.08	0.176	0.119	0.125	0.125	0.684	0.8	0.05	0.785
PWY-5910: superpathway of geranylgeranyldiphosphate biosynthesis I (via mevalonate)	0	0.022	0	0.047	0.125	0.474	0	0.22	0.57
PWY-7254: TCA cycle VII (acetate-producers)	0.138	0.22	0.214	0.188	0.375	0.789	0.133	0.106	0.678
PWY-7384: anaerobic energy metabolism (invertebrates, mitochondrial)	0.109	0.176	0.143	0.172	0.125	0.895	0.267	0.057	0.678
KETOGLUCONMET-PWY: ketogluconate metabolism	0.123	0.176	0.095	0.156	0.25	0.632	0.067	0.511	0.512
REDCITCYC: TCA cycle VI (Helicobacter)	0.051	0.143	0.119	0.156	0.25	0.789	0.2	0.064	0.669
PWY0-166: superpathway of pyrimidine deoxyribonucleotides de novo biosynthesis (E. coli)	0.167	0.231	0.19	0.172	0.25	0.684	0.067	0.426	0.62
FAO-PWY: fatty acid &beta;-oxidation I (generic)	0.087	0.143	0.048	0.109	0.25	0.789	0.133	0.064	0.603
ALLANTOINDEG-PWY: superpathway of allantoin degradation in yeast	0.065	0.077	0.024	0.156	0.438	0.158	0	0.057	0.273
P125-PWY: superpathway of (R,R)-butanediol biosynthesis	0.022	0.011	0.024	0.141	0.312	0.421	0	0.028	0.405
PWY-922: mevalonate pathway I (eukaryotes and bacteria)	0	0.022	0	0.047	0.125	0.579	0	0.227	0.628
PWY-6145: superpathway of CMP-sialic acids biosynthesis	0.239	0.242	0.167	0.297	0.188	0.105	0	0.021	0.058
P122-PWY: heterolactic fermentation	0.051	0.11	0.071	0.188	0.25	0.632	0	0.156	0.587
PWY-5675: nitrate reduction V (assimilatory)	0.116	0.22	0.214	0.234	0.25	0.895	0.133	0.128	0.628
PWY-821: superpathway of sulfur amino acid biosynthesis (Saccharomyces cerevisiae)	0.072	0.132	0.048	0.125	0.188	0.632	0.067	0.064	0.455
PWY-5863: superpathway of phylloquinol biosynthesis	0.065	0.176	0.048	0.156	0.125	0.474	0	0.035	0.306
PWY-5791	0.065	0.176	0.048	0.172	0.188	0.579	0	0.035	0.331
PWY-7385: 1,3-propanediol biosynthesis (engineered)	0.043	0.165	0.143	0.141	0.125	0.737	0	0.035	0.496
PWY-5656: mannosylglycerate biosynthesis I	0.065	0.088	0.024	0.125	0.188	0.526	0	0.035	0.43
PWY0-1338: polymyxin resistance	0.029	0.077	0.048	0.109	0.188	0.632	0	0.043	0.388
PWY-7187: pyrimidine deoxyribonucleotides de novo biosynthesis II	0.087	0.121	0.048	0.141	0.125	0.526	0	0.035	0.198
PWY-5367: petroselinate biosynthesis	0.304	0.253	0.19	0.406	0.188	1	0	0.057	0.471
PWY-7031: protein N-glycosylation (bacterial)	0.109	0.077	0.071	0.094	0	0	0	0	0.182
PWY-6478: GDP-D-glycero-&alpha;-D-manno-heptose biosynthesis	0.609	0.582	0.524	0.281	0.375	0.158	0	0.064	0.025
PWY-7294: D-xylose degradation IV	0.014	0.044	0	0.016	0.062	0.105	0	0	0.033
LPSSYN-PWY: superpathway of lipopolysaccharide biosynthesis	0.014	0.033	0	0.062	0.062	0.474	0	0.007	0.347
PWY0-1061: superpathway of L-alanine biosynthesis	0.051	0.11	0.071	0.094	0.188	0.737	0.067	0.021	0.446
KDO-NAGLIPASYN-PWY: superpathway of (Kdo)2-lipid A biosynthesis	0.036	0.055	0	0.047	0.188	0.526	0	0.007	0.38
PWY-7269: mitochondrial NADPH production (yeast)	0.051	0.088	0	0.062	0.062	0.579	0	0.035	0.397
ECASYN-PWY: enterobacterial common antigen biosynthesis	0.022	0.066	0.024	0.062	0.188	0.526	0	0.021	0.38
P221-PWY: octane oxidation	0.051	0.099	0.048	0.109	0.125	0.526	0.133	0.057	0.438
GLYCOL-GLYOXDEG-PWY: superpathway of glycol metabolism and degradation	0.087	0.132	0.071	0.141	0.25	0.684	0	0.035	0.628
PWY-5705: allantoin degradation to glyoxylate III	0.043	0.077	0.048	0.078	0.125	0.526	0	0.014	0.388
PWY0-42: 2-methylcitrate cycle I	0.051	0.11	0.119	0.078	0.125	0.737	0	0.085	0.661
PWY-5747: 2-methylcitrate cycle II	0.058	0.143	0.167	0.078	0.188	0.789	0.067	0.121	0.702
PWY0-1533: methylphosphonate degradation I	0.014	0.022	0	0.062	0.062	0.526	0	0.057	0.355
DENITRIFICATION-PWY: nitrate reduction I (denitrification)	0	0.011	0	0.031	0.062	0	0	0.043	0.116
PWY-6876: isopropanol biosynthesis (engineered)	0.08	0.099	0.095	0.109	0.25	0.474	0.533	0.014	0.653
PWY-7371: 1,4-dihydroxy-6-naphthoate biosynthesis II	0.435	0.407	0.5	0.516	0.438	0.053	0.067	0.298	0.711
PWY-6953: dTDP-3-acetamido-&alpha;-D-fucose biosynthesis	0.167	0.187	0.048	0.125	0	0	0	0.383	0.074
PROPFERM-PWY: superpathway of L-alanine fermentation (Stickland reaction)	0.014	0.022	0.024	0.188	0.375	0.158	0	0	0.083
PWY-5920: superpathway of heme b biosynthesis from glycine	0.065	0.132	0.048	0.094	0.188	0.421	0.067	0.071	0.455
PWY-6415: L-ascorbate biosynthesis V (euglena, D-galacturonate pathway)	0.116	0.121	0.238	0.266	0.125	0.158	0	0	0.017
AST-PWY: L-arginine degradation II (AST pathway)	0.029	0.099	0.024	0.062	0.188	0.526	0	0.05	0.43
PWY-7204: pyridoxal 5'-phosphate salvage II (plants)	0.058	0.099	0.119	0.125	0.188	0.632	0	0.021	0.43
PWY-4722: creatinine degradation II	0	0	0	0.031	0.062	0	0	0	0.017
UBISYN-PWY: superpathway of ubiquinol-8 biosynthesis (early decarboxylation)	0.043	0.121	0.024	0.078	0.188	0.632	0	0.035	0.579
PWY-7094: fatty acid salvage	0.043	0.099	0.048	0.047	0.188	0.684	0	0.05	0.512
PWY-6467: Kdo transfer to lipid IVA III (Chlamydia)	0.007	0	0	0.016	0	0	0	0	0.099
PWY-6708: ubiquinol-8 biosynthesis (early decarboxylation)	0.051	0.121	0.024	0.078	0.188	0.684	0	0.05	0.595
PWY-7446: sulfoquinovose degradation I	0.022	0.088	0	0.047	0.125	0.526	0	0.021	0.364
PWY-5855: ubiquinol-7 biosynthesis (early decarboxylation)	0.051	0.121	0.024	0.078	0.188	0.684	0	0.05	0.595
PWY-5856: ubiquinol-9 biosynthesis (early decarboxylation)	0.051	0.121	0.024	0.078	0.188	0.684	0	0.05	0.595
PWY-5857: ubiquinol-10 biosynthesis (early decarboxylation)	0.051	0.121	0.024	0.078	0.188	0.684	0	0.05	0.595
PWY-5994: palmitate biosynthesis (type I fatty acid synthase)	0.007	0	0.024	0.031	0	0.368	0	0	0.421
PWY-6906: chitin derivatives degradation	0.014	0.011	0.024	0.047	0.062	0	0	0.007	0.041
UDPNACETYLGALSYN-PWY: UDP-N-acetyl-D-glucosamine biosynthesis II	0.014	0.044	0.024	0.062	0.188	0.053	0	0.021	0.091
PWY-5677: succinate fermentation to butanoate	0.043	0.11	0.071	0.078	0.312	0.105	0	0	0.033
P163-PWY: L-lysine fermentation to acetate and butanoate	0.036	0.033	0.024	0.031	0	0	0	0.028	0.463
PWY-2221: Entner-Doudoroff pathway III (semi-phosphorylative)	0	0	0	0.016	0	0	0	0	0
PWY3DJ-35471: L-ascorbate biosynthesis IV (animals, D-glucuronate pathway)	0.022	0.022	0.048	0.047	0.062	0.158	0	0.021	0.058
PWY-5514: UDP-N-acetyl-D-galactosamine biosynthesis II	0	0	0	0.031	0	0.053	0	0	0.05
ORNDEG-PWY: superpathway of ornithine degradation	0.029	0.055	0.071	0.094	0.125	0.632	0	0	0.446
ARGDEG-PWY: superpathway of L-arginine, putrescine, and 4-aminobutanoate degradation	0.029	0.055	0.071	0.094	0.062	0.632	0	0	0.43
ORNARGDEG-PWY: superpathway of L-arginine and L-ornithine degradation	0.029	0.055	0.071	0.094	0.062	0.632	0	0	0.43
PWY-7286: 7-(3-amino-3-carboxypropyl)-wyosine biosynthesis	0.014	0.033	0	0.094	0.062	0.263	0.267	0	0.306
PWY-5532: nucleoside and nucleotide degradation (archaea)	0	0	0	0.016	0	0	0	0	0.314
PWY-5088: L-glutamate degradation VIII (to propanoate)	0.007	0.011	0.024	0.031	0	0.579	0.6	0.071	0.488
PWY-7374: 1,4-dihydroxy-6-naphthoate biosynthesis I	0.007	0	0.024	0.016	0.062	0	0	0.028	0.025
PWY0-1277: 3-phenylpropanoate and 3-(3-hydroxyphenyl)propanoate degradation	0.036	0.077	0.048	0.047	0.062	0.632	0	0	0.438
THREOCAT-PWY: superpathway of L-threonine metabolism	0.036	0.033	0.024	0.062	0	0.474	0	0	0.322
HCAMHPDEG-PWY: 3-phenylpropanoate and 3-(3-hydroxyphenyl)propanoate degradation to 2-hydroxypentadienoate	0.036	0.088	0.071	0.047	0.062	0.632	0	0	0.463
PWY-6690: cinnamate and 3-hydroxycinnamate degradation to 2-hydroxypentadienoate	0.036	0.088	0.071	0.047	0.062	0.632	0	0	0.463
AEROBACTINSYN-PWY: aerobactin biosynthesis	0	0.011	0.024	0.031	0.125	0.105	0	0	0.116
PWY66-388: ceramide degradation by &alpha;-oxidation	0.065	0.121	0.048	0.094	0.125	0.053	0	0.014	0.116
PWY-6823: molybdopterin biosynthesis	0.022	0.055	0.024	0.047	0.062	0.474	0	0.014	0.306
PWY-7039: phosphatidate metabolism, as a signaling molecule	0	0.022	0	0.031	0	0.105	0	0	0.273
PWY-6630: superpathway of L-tyrosine biosynthesis	0.014	0.055	0.024	0.047	0.125	0.684	0	0	0.38
PWY-7409: phospholipid remodeling (phosphatidylethanolamine, yeast)	0.007	0	0	0.031	0	0.158	0	0	0.165
PWY0-41: allantoin degradation IV (anaerobic)	0.014	0.055	0	0.047	0.125	0.474	0	0.014	0.339
PWY-5692: allantoin degradation to glyoxylate II	0.014	0.044	0	0.047	0.062	0.474	0	0.007	0.289
URDEGR-PWY: superpathway of allantoin degradation in plants	0.014	0.044	0	0.047	0.062	0.474	0	0.007	0.289
PWY-5392: reductive TCA cycle II	0.014	0.033	0.024	0.016	0.062	0.421	0.133	0.014	0.215
PWY-6318: L-phenylalanine degradation IV (mammalian, via side chain)	0.007	0.033	0	0.016	0.125	0.316	0	0	0.231
PWY-6167: flavin biosynthesis II (archaea)	0.007	0.011	0	0.094	0.062	0.263	0.067	0	0.306
METHANOGENESIS-PWY: methanogenesis from H2 and CO2	0.014	0	0	0.078	0.125	0.211	0.133	0	0.521
PWY-6349: CDP-archaeol biosynthesis	0.014	0.011	0	0.094	0.062	0.263	0.333	0	0.339
PWY-6350: archaetidylinositol biosynthesis	0.007	0	0	0.078	0.062	0.211	0.133	0	0.281
PWY-5941: glycogen degradation II	0.029	0.011	0	0.062	0.062	0.053	0	0	0
PWY-6281: L-selenocysteine biosynthesis II (archaea and eukaryotes)	0	0.022	0	0.016	0	0	0	0	0.025
PWY-4321: L-glutamate degradation IV	0.022	0.011	0	0.031	0	0.579	0	0.27	0.537
PWY-6396: superpathway of 2,3-butanediol biosynthesis	0	0	0	0.016	0.125	0	0	0	0.198
PWY-6797: 6-hydroxymethyl-dihydropterin diphosphate biosynthesis II (Methanocaldococcus)	0	0	0	0.016	0	0	0	0	0.008
PWY1G-0: mycothiol biosynthesis	0	0.011	0	0.016	0	0.263	0	0	0.165
3-HYDROXYPHENYLACETATE-DEGRADATION-PWY: 4-hydroxyphenylacetate degradation	0.007	0.011	0	0.016	0	0.211	0	0	0.116
PWY-3781: aerobic respiration I (cytochrome c)	0	0.022	0	0.031	0	0.684	0.533	0.014	0.901
PWY-7279: aerobic respiration II (cytochrome c) (yeast)	0	0.022	0	0.031	0	0.421	0	0	0.736
P241-PWY: coenzyme B biosynthesis	0	0	0	0.016	0	0	0	0	0
PWY-7616: methanol oxidation to carbon dioxide	0.014	0.011	0	0.016	0.062	0.421	0	0.007	0.165
PROTOCATECHUATE-ORTHO-CLEAVAGE-PWY: protocatechuate degradation II (ortho-cleavage pathway)	0.007	0.022	0	0.016	0	0.158	0	0.071	0.157
CATECHOL-ORTHO-CLEAVAGE-PWY: catechol degradation to &beta;-ketoadipate	0.007	0.011	0	0.016	0	0.158	0	0.028	0.157
PWY-6185: 4-methylcatechol degradation (ortho cleavage)	0.007	0	0	0.016	0	0.105	0	0.028	0.124
PWY66-367: ketogenesis	0.007	0.011	0	0.031	0	0.211	0	0.014	0.322
PWY-7090: UDP-2,3-diacetamido-2,3-dideoxy-&alpha;-D-mannuronate biosynthesis	0	0	0	0	0	0	0.067	0.113	0.066
PWY-6562: norspermidine biosynthesis	0.007	0	0	0	0	0.368	0.267	0.057	0.289
PWY-7268: cytosolic NADPH production (yeast)	0	0.033	0	0	0	0.053	0	0.043	0.008
PWY-7235: superpathway of ubiquinol-6 biosynthesis (late decarboxylation)	0	0.033	0	0	0	0	0	0	0.273
PWY-5870: ubiquinol-8 biosynthesis (late decarboxylation)	0	0.033	0	0	0	0	0	0	0.149
PWY-5028: L-histidine degradation II	0	0.022	0	0	0	0	0	0.043	0.033
PWY-7245: superpathway of NAD/NADP - NADH/NADPH interconversion (yeast)	0	0.022	0	0	0	0.053	0	0	0
PWY-7118: chitin deacetylation	0	0.022	0	0	0	0.053	0	0	0.099
VALDEG-PWY: L-valine degradation I	0	0.022	0	0	0	0	0	0	0.058
PWY-2201: folate transformations I	0	0.022	0	0	0	0	0	0	0
URSIN-PWY: ureide biosynthesis	0.007	0.022	0	0	0	0.105	0	0.028	0.05
PWY-7511: protein ubiquitination	0	0.022	0	0	0	0	0	0	0.008
PWY-5044: purine nucleotides degradation I (plants)	0	0.022	0	0	0	0	0	0	0.025
PWY-5871: ubiquinol-9 biosynthesis (late decarboxylation)	0	0.022	0	0	0	0	0	0	0.041
PWY-5873: ubiquinol-7 biosynthesis (late decarboxylation)	0	0.022	0	0	0	0	0	0	0.041
PWY-5872: ubiquinol-10 biosynthesis (late decarboxylation)	0	0.022	0	0	0	0	0	0	0.017
PWY-7411: phosphatidate biosynthesis (yeast)	0	0.022	0	0	0	0	0	0	0
PWY-6596: adenosine nucleotides degradation I	0	0.022	0	0	0	0	0	0	0.025
LYSINE-AMINOAD-PWY: L-lysine biosynthesis IV	0	0.022	0	0	0	0	0	0	0
ERGOSTEROL-SYN-PWY: superpathway of ergosterol biosynthesis I	0	0.022	0	0	0	0	0	0	0
PWY-7391: isoprene biosynthesis II (engineered)	0	0.022	0	0	0	0.211	0	0.021	0.322
PWY-7283: wybutosine biosynthesis	0	0.022	0	0	0	0	0	0	0
PWY-6074: zymosterol biosynthesis	0	0.022	0	0	0	0	0	0	0
PWY-6075: ergosterol biosynthesis I	0	0.022	0	0	0	0	0	0	0
PWY6666-2: dopamine degradation	0	0.022	0	0	0	0	0	0	0
PWY-6352: 3-phosphoinositide biosynthesis	0	0.022	0	0	0	0	0	0	0
PWY-6351: D-myo-inositol (1,4,5)-trisphosphate biosynthesis	0	0.022	0	0	0	0	0	0	0
PWY-7546: diphthamide biosynthesis II (eukaryotes)	0	0.022	0	0	0	0	0	0	0
PWY-6309: L-tryptophan degradation XI (mammalian, via kynurenine)	0	0.022	0	0	0	0	0	0	0.058
PWY-5080: very long chain fatty acid biosynthesis I	0	0.022	0	0	0	0	0	0	0
PWY-6598: sciadonate biosynthesis	0	0.022	0	0	0	0	0	0	0
PWY-7619: juniperonate biosynthesis	0	0.022	0	0	0	0	0	0	0
MANNOSYL-CHITO-DOLICHOL-BIOSYNTHESIS: protein N-glycosylation initial phase (eukaryotic)	0	0.022	0	0	0	0	0	0	0
PWY-5381: NAD salvage (plants)	0	0.022	0	0	0	0	0	0	0
7ALPHADEHYDROX-PWY	0	0.011	0	0	0	0	0	0.028	0.008
PWY-7317: superpathway of dTDP-glucose-derived O-antigen building blocks biosynthesis	0	0.011	0	0	0	0	0	0	0
TRIGLSYN-PWY: diacylglycerol and triacylglycerol biosynthesis	0	0.011	0	0	0	0	0	0	0
PWY-7420: monoacylglycerol metabolism (yeast)	0	0.011	0	0	0	0	0	0	0
PWY-5654: 2-amino-3-carboxymuconate semialdehyde degradation to 2-hydroxypentadienoate	0.007	0.022	0	0	0	0.105	0	0	0.008
PWY-6210: 2-aminophenol degradation	0.007	0.022	0	0	0	0.105	0	0	0.017
PWY-7165: L-ascorbate biosynthesis VIII (engineered pathway)	0	0.011	0	0	0	0.105	0	0.028	0.033
PWY-5181: toluene degradation III (aerobic) (via p-cresol)	0	0.011	0	0	0	0.053	0	0.043	0.025
PWY-5417: catechol degradation III (ortho-cleavage pathway)	0.007	0.011	0	0	0	0.158	0	0.028	0.14
PWY-5431: aromatic compounds degradation via &beta;-ketoadipate	0.007	0.011	0	0	0	0.158	0	0.028	0.14
DHGLUCONATE-PYR-CAT-PWY: glucose degradation (oxidative)	0.007	0.011	0	0	0	0.105	0	0	0
PWY5F9-12: biphenyl degradation	0	0.011	0	0	0	0	0	0	0.066
PWY-1541: superpathway of taurine degradation	0.007	0.011	0	0	0	0.053	0	0	0.033
PWY-6565: superpathway of polyamine biosynthesis III	0	0	0	0	0	0.105	0	0.057	0.149
PWY-6215: 4-chlorobenzoate degradation	0	0	0	0	0	0.211	0	0	0.083
PWY-6174: mevalonate pathway II (haloarchaea)	0	0	0	0	0	0.211	0	0	0.198
P562-PWY: myo-inositol degradation I	0	0	0	0	0	0.053	0	0.532	0.157
LIPASYN-PWY: phospholipases	0	0	0	0	0	0.053	0	0	0.174
PWY-5156: superpathway of fatty acid biosynthesis II (plant)	0	0	0	0	0	0.053	0	0	0.041
PWY-6182: superpathway of salicylate degradation	0.007	0	0	0	0	0.053	0	0.028	0.091
PWY-5180: toluene degradation I (aerobic) (via o-cresol)	0	0	0	0	0.062	0.053	0	0	0.041
PWY-5182: toluene degradation II (aerobic) (via 4-methylcatechol)	0	0	0	0	0.062	0.053	0	0.014	0.041
PWY-5415: catechol degradation I (meta-cleavage pathway)	0	0	0	0	0.062	0.053	0	0	0.083
PWY-5751: phenylethanol biosynthesis	0	0	0	0	0	0.053	0	0	0.041
PWY-5178: toluene degradation IV (aerobic) (via catechol)	0	0	0	0	0	0.053	0	0	0.017
CRNFORCAT-PWY: creatinine degradation I	0.007	0	0	0	0.062	0	0	0.007	0.033
PWY66-375: leukotriene biosynthesis	0	0	0	0	0	0	0	0	0.008
PWY-6435: 4-hydroxybenzoate biosynthesis III (plants)	0	0	0	0	0	0	0	0	0.017
PWY-6834: spermidine biosynthesis III	0	0	0	0	0	0	0	0.078	0.083
PWY3O-1109	0	0	0	0	0	0	0	0	0.017
PWY-5754: 4-hydroxybenzoate biosynthesis I (eukaryotes)	0	0	0	0	0	0	0	0	0.017
LEU-DEG2-PWY: L-leucine degradation I	0	0	0	0	0	0	0	0.021	0.157
PWY-6165: chorismate biosynthesis II (archaea)	0	0	0	0	0	0	0	0	0.107
PWY-7373: superpathway of demethylmenaquinol-6 biosynthesis II	0	0	0	0	0	0	0	0	0.174
P101-PWY: ectoine biosynthesis	0	0	0	0	0	0	0	0	0.091
PWY-5136: fatty acid &beta;-oxidation II (plant peroxisome)	0	0	0	0	0	0	0	0	0.099
PWY-181: photorespiration	0	0	0	0	0	0	0	0	0.116
PWY-1622: formaldehyde assimilation I (serine pathway)	0	0	0	0	0	0	0	0	0.083
PWY-561: superpathway of glyoxylate cycle and fatty acid degradation	0	0	0	0	0	0	0	0	0.091
PWY-6837: fatty acid &beta;-oxidation V (unsaturated, odd number, di-isomerase-dependent)	0	0	0	0	0	0	0	0	0.099
PWY66-373: sucrose degradation V (sucrose &alpha;-glucosidase)	0	0	0	0	0	0	0	0	0.041
PWY66-391: fatty acid &beta;-oxidation VI (mammalian peroxisome)	0	0	0	0	0	0	0	0	0.033
PWY-7288: fatty acid &beta;-oxidation VII (yeast peroxisome)	0	0	0	0	0	0	0	0	0.033
PWY-7337: 10-cis-heptadecenoyl-CoA degradation (yeast)	0	0	0	0	0	0	0	0	0.033
PWY-7338: 10-trans-heptadecenoyl-CoA degradation (reductase-dependent, yeast)	0	0	0	0	0	0	0	0	0.033
PWY-7290: Escherichia coli serotype O86 O-antigen biosynthesis	0	0	0	0	0	0	0	0	0.017
PWY-3502: superpathway of NAD biosynthesis in eukaryotes	0	0	0	0	0	0	0	0.014	0.05
NADSYN-PWY: NAD de novo biosynthesis II (from tryptophan)	0	0	0	0	0	0	0	0.014	0.05
P165-PWY: superpathway of purines degradation in plants	0	0	0	0	0	0	0	0	0.025
PWY-5651: L-tryptophan degradation to 2-amino-3-carboxymuconate semialdehyde	0	0	0	0	0	0	0	0.014	0.05
TYRFUMCAT-PWY: L-tyrosine degradation I	0	0	0	0	0	0	0	0.028	0.066
PWY-1361: benzoyl-CoA degradation I (aerobic)	0	0	0	0	0	0	0	0	0.033
PWY-6748: nitrate reduction VII (denitrification)	0	0	0	0	0	0	0	0	0.033
PWY-5420: catechol degradation II (meta-cleavage pathway)	0	0	0	0	0	0	0	0	0.041
PWY-5430: meta cleavage pathway of aromatic compounds	0	0	0	0	0	0	0	0	0.025
ILEUDEG-PWY: L-isoleucine degradation I	0	0	0	0	0	0	0	0.007	0.05
PWY-5419: catechol degradation to 2-hydroxypentadienoate II	0	0	0	0	0	0	0	0	0.041
P184-PWY: protocatechuate degradation I (meta-cleavage pathway)	0	0	0	0	0	0	0	0	0.008
PWY-6760: D-xylose degradation III	0	0	0	0	0	0	0	0	0.017
METHYLGALLATE-DEGRADATION-PWY: methylgallate degradation	0	0	0	0	0	0	0	0	0.008
PWY1F-823: leucopelargonidin and leucocyanidin biosynthesis	0	0	0	0	0	0	0	0.057	0.033
GALLATE-DEGRADATION-I-PWY: gallate degradation II	0	0	0	0	0	0	0	0	0.008
PWY-7124: ethene biosynthesis V (engineered)	0	0	0	0	0	0	0	0	0.008
P281-PWY: 3-phenylpropanoate degradation	0	0	0	0	0	0	0	0	0.025
PWY66-201: nicotine degradation IV	0	0	0	0	0	0	0	0	0.05
PWY-6992: 1,5-anhydrofructose degradation	0	0	0	0	0	0	0	0	0.025
PWY-4221: superpathway of coenzyme A biosynthesis II (plants)	0	0	0	0	0	0	0	0	0.008
PWY-6313: serotonin degradation	0	0	0	0	0	0	0	0	0.008
PWY-3941: &beta;-alanine biosynthesis II	0	0	0	0	0	0	0	0	0.008
PWY-6307: L-tryptophan degradation X (mammalian, via tryptamine)	0	0	0	0	0	0	0	0	0.008
PWY-7431: aromatic biogenic amine degradation (bacteria)	0	0	0	0	0	0	0	0	0.008
PWY-6339: syringate degradation	0	0	0	0	0	0	0	0	0.008
SUCSYN-PWY: sucrose biosynthesis I (from photosynthesis)	0	0	0	0	0	0	0	0	0.017
PWY-7654: (8E,10E)-dodeca-8,10-dienol biosynthesis	0	0	0	0	0	0	0	0	0.008
CHLOROPHYLL-SYN: 3,8-divinyl-chlorophyllide a biosynthesis I (aerobic, light-dependent)	0	0	0	0	0	0	0	0	0.017
PWY-7238: sucrose biosynthesis II	0	0	0	0	0	0	0	0	0.017
PWY-5647: 2-nitrobenzoate degradation I	0.007	0	0	0	0	0	0	0	0.008
PWY-5531: 3,8-divinyl-chlorophyllide a biosynthesis II (anaerobic)	0	0	0	0	0	0	0	0	0.008
PWY-7159: 3,8-divinyl-chlorophyllide a biosynthesis III (aerobic, light independent)	0	0	0	0	0	0	0	0	0.008
PWY-5529: superpathway of bacteriochlorophyll a biosynthesis	0	0	0	0	0	0	0	0	0.008
PWY-7347: sucrose biosynthesis III	0	0	0	0	0	0	0	0	0.017
LYSINE-DEG1-PWY: L-lysine degradation XI (mammalian)	0	0	0	0	0	0	0	0	0.008
PWY-5757: fosfomycin biosynthesis	0	0	0	0	0	0	0	0	0.017
PWY-6557: glycosaminoglycan-protein linkage region biosynthesis	0	0	0	0	0	0	0	0	0.017
PWY-6728: methylaspartate cycle	0	0	0	0	0	0	0	0	0.033
PWY-3661: glycine betaine degradation I	0	0	0	0	0	0	0	0.028	0.008
PWY-5109: propanoate fermentation to 2-methylbutanoate	0	0	0	0	0	0	0	0	0.008
PWY-6583: pyruvate fermentation to butanol I	0	0	0	0	0	0	0	0	0.017
PWY-5177: glutaryl-CoA degradation	0	0	0	0	0	0	0	0	0.017
PWY-7413: dTDP-6-deoxy-&alpha;-D-allose biosynthesis	0	0	0	0	0	0	0	0	0.017
GLUDEG-II-PWY: L-glutamate degradation VII (to butanoate)	0	0	0	0	0	0	0	0	0.008
PWY-6098: diploterol biosynthesis	0	0	0	0	0	0	0	0	0.008
PWY-7342: superpathway of nicotine biosynthesis	0	0	0	0	0	0	0	0.028	0
PWY-6486: D-galacturonate degradation II	0	0	0	0	0	0	0	0.035	0
PWY-6660: 2-heptyl-3-hydroxy-4(1H)-quinolone biosynthesis	0	0	0	0	0	0	0	0.014	0
PWY-6986: alginate degradation	0	0	0	0	0	0	0	0.007	0
